# Supplementary material for: Deep Proteomic Analysis on Biobanked Paraffine-Archived Melanoma with Prognostic/Predictive Biomarker Read-Out
Source: MDPI journal article supplement (doi:10.3390/cancers13236105), 2021-12-03

## Table of contents

|                |   |
|----------------|---|
| FIGURE S1..... | 2 |
| FIGURE S2..... | 3 |
| FIGURE S3..... | 4 |
| TABLE S1.....  | 5 |
| TABLE S2.....  | 7 |
| FIGURE S4..... | 9 |

Figure S1

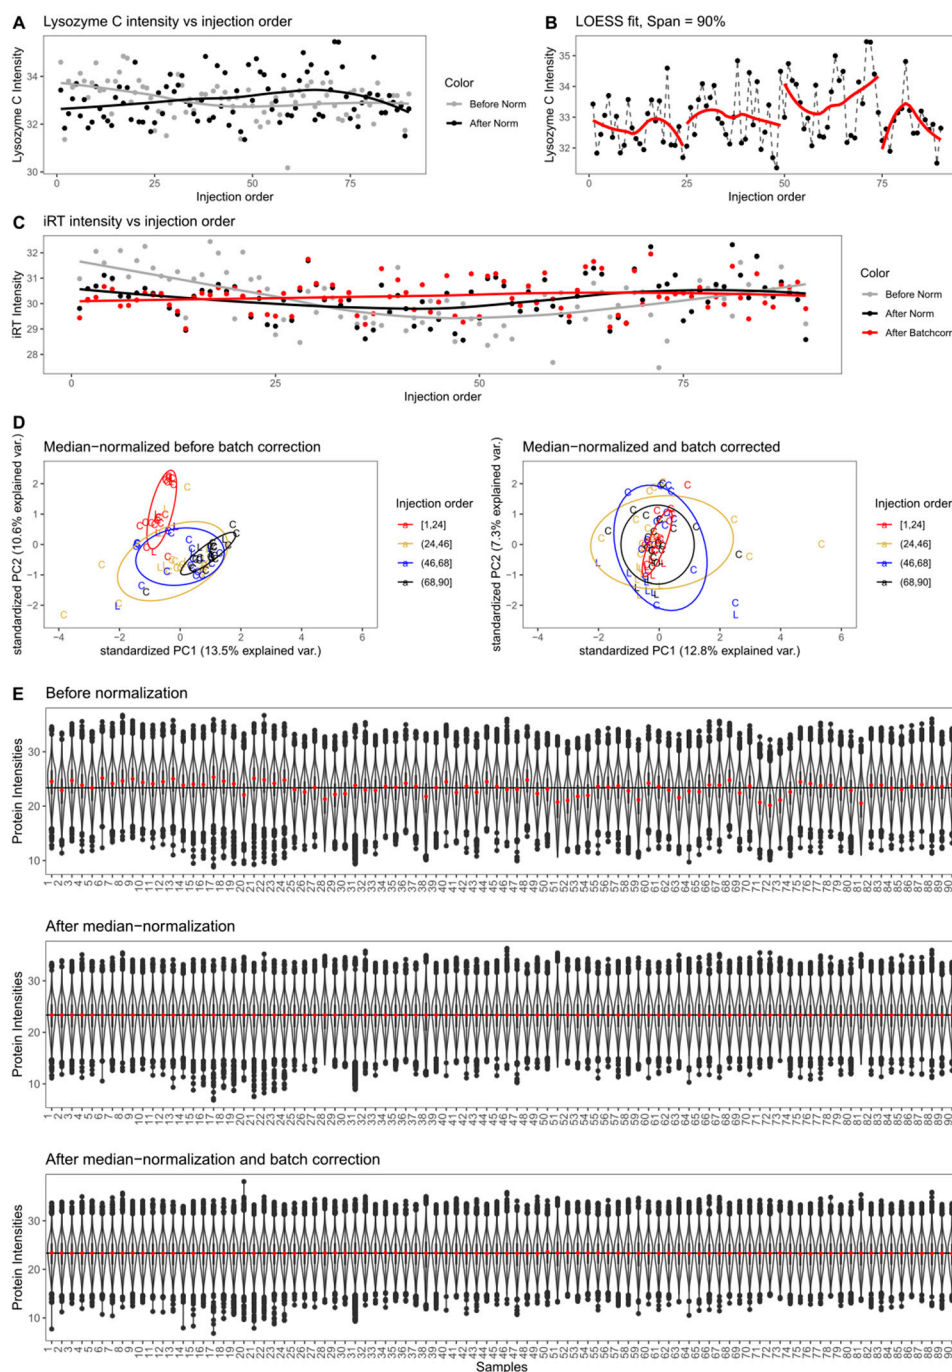

**Figure S1.** Quality control plots for proteomic data normalization and batch effect correction. (A) Lysozyme C (spike-in) protein intensity versus the injection order in the LC-MS/MS analysis. A continuous drift in the intensity values was observed before and after median-normalization, shown in dark grey and black respectively. (B) Continuous drift correction of Lysozyme C protein intensities based on a batch correction method implemented in proBatch. A non-linear trend (shown in red) was fitted on the intensities in each batch, which was then subtracted from all protein intensity values. (C) The iRT intensity before and after normalization, and after batch correction (shown with dark grey, black and red respectively). After batch correction, the intensities were fairly constant. (D) Principal Component Analysis (PCA) plot of the samples after median normalization. Separation based on the injection order was observed. (E) PCA plot of the samples after batch effect correction. Separation based on the injection order was no longer visible, as well as samples of lymph node origin were mainly clustering separately from samples of cutaneous origin (denoted as L and C on the plot).

# Figure S2

A

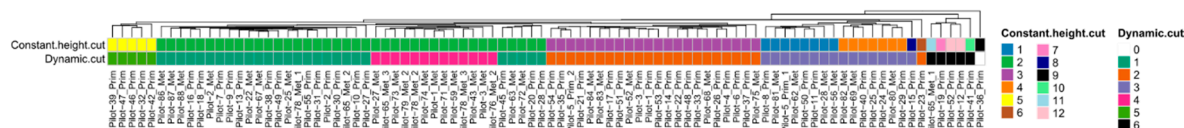

B

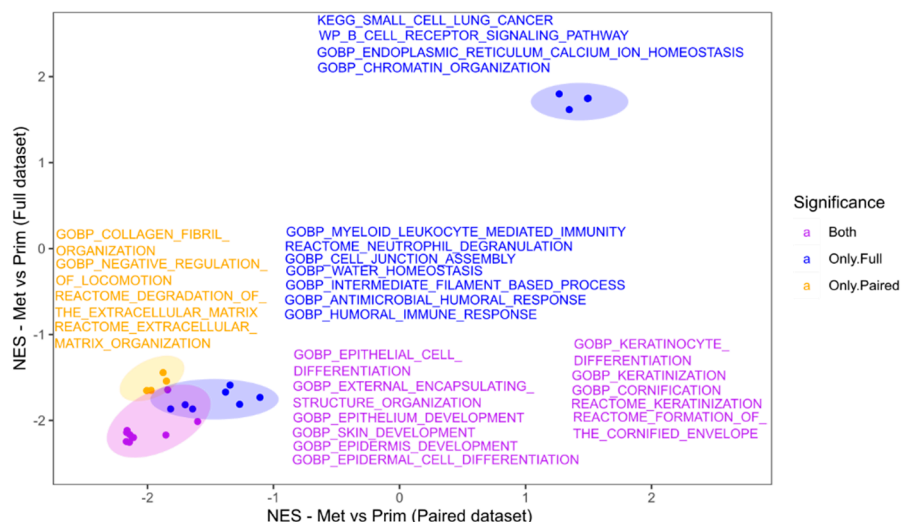

C

|            | All identified proteins | Proteins used in ANCOVA | Significantly upregulated proteins (p-value < 0.05 and regression coefficient > 0) | Significantly downregulated proteins (p-value < 0.05 and regression coefficient < 0) |
|------------|-------------------------|-------------------------|------------------------------------------------------------------------------------|--------------------------------------------------------------------------------------|
| # Proteins | 7881                    | 6907                    | 147                                                                                | 152                                                                                  |

D

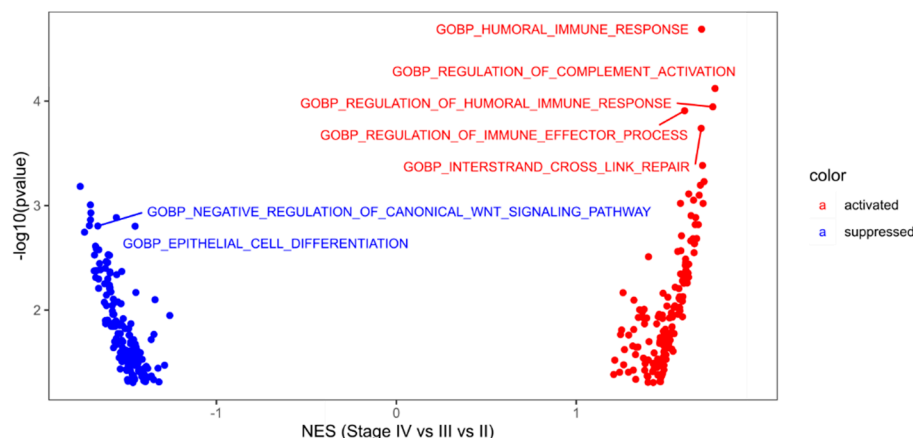

**Figure S2.** Addressing sample heterogeneity in our study. (A) Difference between dynamic tree cutting and tree cutting at a constant height. The samples are clustered based on their Z-score normalized protein expression table using Euclidean distance and complete linkage. Heatmap annotations show the results of tree cutting at a constant height (setting the number of clusters to an arbitrary value of 12), and the results of dynamic tree cutting. The latter method chose the optimal number of clusters automatically, was able to detect nested clusters and did not result in multiple clusters consisting of only a single sample. (B) A contrast between activated and suppressed processes in metastasis samples when comparing the 8 paired patient samples (paired t-test) or when comparing all samples (t-test between 53 primary and 37 metastasis samples). Significance was set to pGSEA FDR < 0.05 and dots are colored according to significance in the datasets. A positive NES indicates an activated gene set in metastasis samples, whereas negative NES indicates suppression of the gene set in metastasis samples. A high alignment between the results was detected, with multiple commonly significant gene sets, and when significance was not shared, the processes were still indicating the same direction (i.e., same NES sign) in both datasets. (C) Summary of ANCOVA results comparing protein expression between clinical stages II-IV. (D) Pre-ranked gene set enrichment analysis results for proteins showing linear up- and downregulation from stage II to IV. Gene sets discussed in the text are highlighted.

Figure S3

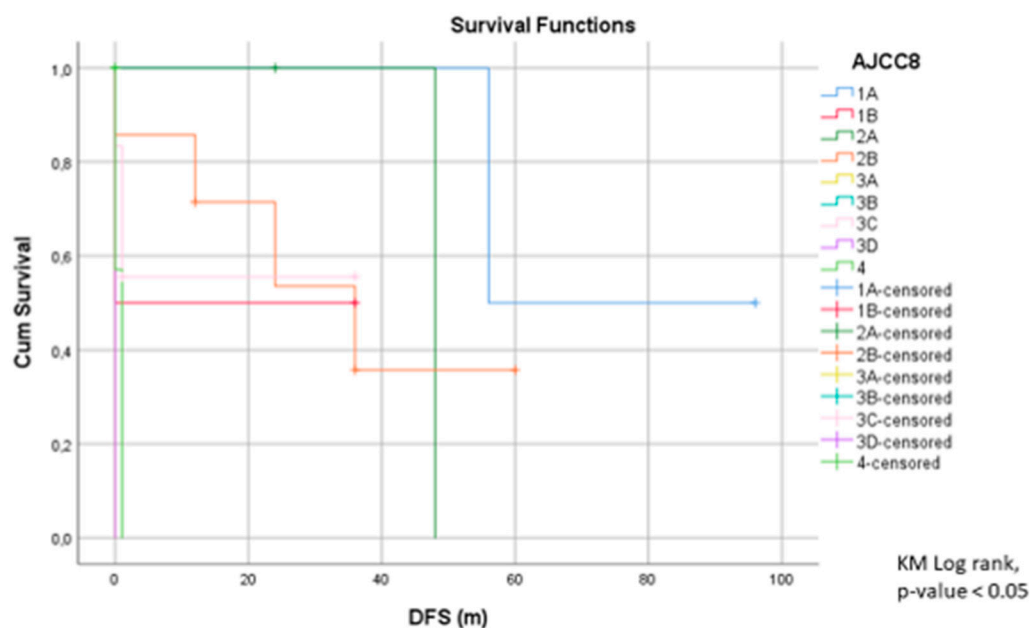

| AJCC8   | Percentiles |            |          |            |          |            |
|---------|-------------|------------|----------|------------|----------|------------|
|         | 25,0%       |            | 50,0%    |            | 75,0%    |            |
|         | Estimate    | Std. Error | Estimate | Std. Error | Estimate | Std. Error |
| 1A      |             |            | 56,000   | .          | 56,000   | .          |
| 1B      |             |            | ,000     | .          | ,000     | .          |
| 2A      | 48,000      | .          | 48,000   | .          | 48,000   | .          |
| 2B      | .           | .          | 36,000   | 13,301     | 12,000   | 12,749     |
| 3A      | ,000        | .          | ,000     | .          | ,000     | .          |
| 3C      |             |            |          |            | 1,000    | ,894       |
| 3D      | ,000        | .          | ,000     | .          | ,000     | .          |
| 4       | 1,000       | .          | 1,000    | .          | ,000     | .          |
| Overall | 56,000      | .          | 36,000   | 21,982     | ,000     | .          |

| Overall Comparisons            |            |    |      |
|--------------------------------|------------|----|------|
|                                | Chi-Square | df | Sig. |
| Log Rank (Mantel-Cox)          | 5,277      | 1  | ,022 |
| Breslow (Generalized Wilcoxon) | 4,001      | 1  | ,045 |
| Tarone-Ware                    | 4,784      | 1  | ,029 |

**Figure S3.** Kaplan-Meier Survival analysis of the treated patients based on their AJCC8 classification stage during disease-free survival. /DFS is calculated in months (m), DFS – disease free survival, AJCC8 - American Joint Committee on Cancer 8th Edition/ KM Log rank, Breslow (Generalized Wilcoxon), Tarone Ware p-value < 0.05. Kaplan-Meier survival analyses and figures showing p-values, quartile values, and 95% confidence intervals were produced by IBM SPSS statistics package (26.0 version) software.

# Table S1

**Table S1.** Fisher's exact test results for clinical and histopathological categories (borderline) significantly enriched in the detected sample clusters. /Abbreviations: Mel - melanoma, OS - overall survival, DFS - disease free survival, PFS - progression-free survival. /

| <i>Cluster</i> | <i>Trait</i>                                     | <i>P value</i> | <i>Patient Ratios</i>                    | <i>Odds Ratio</i> |
|----------------|--------------------------------------------------|----------------|------------------------------------------|-------------------|
| 1              | Localisation of primary mel. – head and neck     | 0.0355         | In Cluster: 9/26, Out of Cluster: 9/62   | 0.3255            |
| 1              | OS – 101 to 205 (m)                              | 0.0466         | In Cluster: 7/26, Out of Cluster: 6/61   | 0.3010            |
| 2              | Type of Samples - Primary                        | 0.0240         | In Cluster: 18/23, Out of Cluster: 35/67 | 0.3077            |
| 2              | DFS – 11 to 30 (m)                               | 0.0835         | In Cluster: 6/23, Out of Cluster: 7/64   | 0.3529            |
| 2              | Regression of the primary mel. - yes             | 0.0918         | In Cluster: 8/23, Out of Cluster: 11/61  | 0.4174            |
| 3              | Localisation of primary mel. – upper extremities | 0.0069         | In Cluster: 6/16, Out of Cluster: 6/72   | 0.1564            |
| 3              | PFS – 61 to 100 (m)                              | 0.0913         | In Cluster: 4/15, Out of Cluster: 7/72   | 0.3016            |
| 4              | Type of Samples - Metastasis                     | <0.0001        | In Cluster: 13/13, Out of Cluster: 24/77 | 0.0000            |
| 4              | Organ of the Samples – lymph node                | <0.0001        | In Cluster: 13/13, Out of Cluster: 11/77 | 0.0000            |
| 4              | AJCC8 Stage - 3D                                 | 0.0286         | In Cluster: 4/12, Out of Cluster: 6/75   | 0.1794            |
| 4              | Breslow – 4.1 to 8 mm                            | 0.0616         | In Cluster: 6/11, Out of Cluster: 19/73  | 0.2982            |
| 4              | Sex - male                                       | 0.0703         | In Cluster: 10/13, Out of Cluster: 39/77 | 0.3117            |
| 4              | DFS – 0 to 10 (m)                                | 0.0778         | In Cluster: 10/12, Out of Cluster: 43/75 | 0.2723            |
| 4              | Localisation of primary mel. – lower extremities | 0.0786         | In Cluster: 6/12, Out of Cluster: 19/76  | 0.3382            |
| 5              | Subtype - ALM                                    | 0.0001         | In Cluster: 3/5, Out of Cluster: 0/85    | 0.0000            |

|   |                                                  |        |                                        |        |
|---|--------------------------------------------------|--------|----------------------------------------|--------|
| 5 | Localisation of primary mel. – lower extremities | 0.0014 | In Cluster: 5/5, Out of Cluster: 20/83 | 0.0000 |
| 5 | Sex - female                                     | 0.0171 | In Cluster: 5/5, Out of Cluster: 36/85 | 0.0000 |
| 5 | BRAFstate - NO (cKIT mutation)                   | 0.0568 | In Cluster: 1/5, Out of Cluster: 0/83  | 0.0000 |
| 5 | AJCC8 stage - 2A                                 | 0.0647 | In Cluster: 2/5, Out of Cluster: 6/82  | 0.1243 |
| 5 | Type of Samples – Primary mel.                   | 0.0653 | In Cluster: 5/5, Out of Cluster: 48/85 | 0.0000 |
| 5 | PFS – 10 to 30 (m)                               | 0.0662 | In Cluster: 4/5, Out of Cluster: 29/82 | 0.1399 |
| 5 | OS – 10 to 30 (m)                                | 0.0662 | In Cluster: 4/5, Out of Cluster: 29/82 | 0.1399 |
| 5 | AJCC8 stage - 3C                                 | 0.0774 | In Cluster: 3/5, Out of Cluster: 17/82 | 0.1791 |
| 6 | DFS – 30 to 60 (m)                               | 0.0342 | In Cluster: 3/5, Out of Cluster: 12/82 | 0.1189 |

---

## Table S2

**Table S2.** The stages of patients at diagnosis and after follow-up in Cluster 1, 2 and 4. Clinical stage based on AJCC8 classification.

| Cluster 1<br>(n = 26) | Stage at<br>diagnosis | Stage<br>after<br>follow<br>up | Cluster 2<br>(n=23) | Stage at<br>diagnosis | Stage<br>after<br>follow<br>up | Cluster 4<br>(n=12) | Stage at<br>diagnosis | Stage<br>after<br>follow<br>up |
|-----------------------|-----------------------|--------------------------------|---------------------|-----------------------|--------------------------------|---------------------|-----------------------|--------------------------------|
| <i>Pilot-10</i>       | IIB                   | IIB                            | <i>Pilot-37</i>     | IA                    | IIIA                           | <i>Pilot-27</i>     | IIB                   | IV                             |
| <i>Pilot-65</i>       | NA                    | NA                             | <i>Pilot-84</i>     | IIIC                  | IV                             | <i>Pilot-3</i>      | IIID                  | IIID                           |
| <i>Pilot-2</i>        | IB                    | IV                             | <i>Pilot-68</i>     | IV                    | IV                             | <i>Pilot-76</i>     | IV                    | IV                             |
| <i>Pilot-30</i>       | IIA                   | IV                             | <i>Pilot-33</i>     | IV                    | IV                             | <i>Pilot-65</i>     | NA                    | NA                             |
| <i>Pilot-87</i>       | IV                    | IV                             | <i>Pilot-5</i>      | IV                    | IV                             | <i>Pilot-43</i>     | IIID                  | IV                             |
| <i>Pilot-27</i>       | IIB                   | IV                             | <i>Pilot-35</i>     | IIB                   | IIB                            | <i>Pilot-59</i>     | IIIC                  | IIIC                           |
| <i>Pilot-25</i>       | IIB                   | IV                             | <i>Pilot-23</i>     | IIA                   | IV                             | <i>Pilot-79</i>     | IIIC                  | IV                             |
| <i>Pilot-76</i>       | IIID                  | IIID                           | <i>Pilot-54</i>     | IIB                   | IIB                            | <i>Pilot-78</i>     | IIID                  | IIID                           |
| <i>Pilot-67</i>       | IV                    | IV                             | <i>Pilot-53</i>     | IIIC                  | IV                             | <i>Pilot-1</i>      | IV                    | IV                             |
| <i>Pilot-31</i>       | IIB                   | NA                             | <i>Pilot-51</i>     | IIB                   | IV                             | <i>Pilot-71</i>     | IIIA                  | IV                             |
| <i>Pilot-7</i>        | IV                    | IV                             | <i>Pilot-26</i>     | IIA                   | IIIC                           | <i>Pilot-74</i>     | IIIC                  | IV                             |
| <i>Pilot-9</i>        | IIB                   | IV                             | <i>Pilot-52</i>     | IV                    | IV                             | <i>Pilot-73</i>     | IIIB                  | IV                             |
| <i>Pilot-45</i>       | IIID                  | IIID                           | <i>Pilot-17</i>     | IIIB                  | IIIB                           |                     |                       |                                |
| <i>Pilot-86</i>       | IIIC                  | IV                             | <i>Pilot-4</i>      | IIIB                  | IV                             |                     |                       |                                |
| <i>Pilot-72</i>       | IIA                   | IV                             | <i>Pilot-14</i>     | IV                    | IV                             |                     |                       |                                |
| <i>Pilot-88</i>       | IIB                   | IV                             | <i>Pilot-75</i>     | IIB                   | IV                             |                     |                       |                                |

|                 |      |      |                 |      |      |  |  |  |
|-----------------|------|------|-----------------|------|------|--|--|--|
| <i>Pilot-13</i> | IIIC | IV   | <i>Pilot-6</i>  | IIIC | IV   |  |  |  |
| <i>Pilot-63</i> | IA   | IV   | <i>Pilot-21</i> | IIIC | IV   |  |  |  |
| <i>Pilot-28</i> | IIIC | IV   | <i>Pilot-1</i>  | IV   | IV   |  |  |  |
| <i>Pilot-38</i> | IIB  | IV   | <i>Pilot-22</i> | IIID | IIID |  |  |  |
| <i>Pilot-18</i> | IIB  | IV   | <i>Pilot-48</i> | IIIC | IIIC |  |  |  |
| <i>Pilot-20</i> | IIIB | IIIB | <i>Pilot-83</i> | IIA  | IV   |  |  |  |
| <i>Pilot-16</i> | IIIB | IIIB | <i>Pilot-3</i>  | IIID | IIID |  |  |  |
| <i>Pilot-55</i> | IIIC | IIIC |                 |      |      |  |  |  |
| <i>Pilot-49</i> | IIA  | IIA  |                 |      |      |  |  |  |
| <i>Pilot-22</i> | IIID | IIID |                 |      |      |  |  |  |
|                 |      |      |                 |      |      |  |  |  |



**Figure S4.** Functional annotation (Gene Ontology Biological Processes) of proteins significantly (FDR < 0.05) associated with therapy response. (A) Enrichment analysis results for proteins showing overexpression in patients with better response (left) and worse response (right) to targeted therapy. (B) Enrichment analysis results for proteins showing overexpression in patients with better response (top) and worse response (bottom) to targeted therapy. /FDR- false discovery rate/.

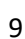

Supplement: s1 [file s1]
