# Supplementary material for: Deep Proteomic Analysis on Biobanked Paraffine-Archived Melanoma with Prognostic/Predictive Biomarker Read-Out
Source: Cancers (Basel). 2021 Dec 3;13(23):6105. doi: 10.3390/cancers13236105 (PMC8657028; doi:10.3390/cancers13236105)
Supplement: Supplementary file 1 [file cancers-13-06105-s001.zip › Suppl.Document-S1_Cancers-2021-11-24_SZL_final.xlsx]

## Sheet: Summarized proteomics
ID	MS/MS Counts per sample	PSMs per sample	Number of proteins per sample
Pilot-84	103843	78241	7363
Pilot-15	76366	43541	6954
Pilot-63	72228	37716	7315
Pilot-7	96401	84136	7416
Pilot-22	102889	102801	7506
Pilot-21	95205	48619	7313
Pilot-22	102842	90982	7492
Pilot-45	104697	79478	7415
Pilot-88	104649	96195	7502
Pilot-80	74722	30030	7160
Pilot-48	99571	70345	7391
Pilot-14	79925	55633	7387
Pilot-17	99648	63660	7356
Pilot-26	95907	72486	7356
Pilot-2	103424	99229	7502
Pilot-52	48818	26419	7061
Pilot-52	93436	63798	7400
Pilot-36	84868	55746	6793
Pilot-25	109449	106566	7494
Pilot-25	71337	50099	7289
Pilot-69	95649	99892	7419
Pilot-38	106315	111967	7550
Pilot-73	102407	91452	7499
Pilot-79	106871	109322	7550
Pilot-30	100237	89045	7475
Pilot-71	100855	88196	7491
Pilot-2	98447	96728	7487
Pilot-75	96390	41259	7147
Pilot-82	69747	41849	7383
Pilot-68	99873	86277	7413
Pilot-16	101619	85961	7437
Pilot-59	101982	95809	7502
Pilot-76	100874	108834	7506
Pilot-55	97073	84133	7473
Pilot-13	95383	78992	7439
Pilot-23	90432	38022	7107
Pilot-24	97453	65689	7271
Pilot-27	95813	78381	7377
Pilot-37	101195	54399	7201
Pilot-50	103434	102164	7477
Pilot-27	92957	74051	7415
Pilot-20	86243	81730	7389
Pilot-72	91370	62931	7339
Pilot-19	59764	35384	6933
Pilot-43	97277	91315	7450
Pilot-5	99561	79323	7420
Pilot-5	99460	89518	7450
Pilot-1	107337	108632	7544
Pilot-65	100861	92055	7415
Pilot-65	41126	32371	6990
Pilot-65	110588	101480	7515
Pilot-87	104708	91293	7457
Pilot-56	95399	97072	7409
Pilot-1	104788	96110	7511
Pilot-11	107493	103941	7516
Pilot-67	105356	107465	7492
Pilot-28	71161	36765	7167
Pilot-31	97873	92792	7419
Pilot-32	98872	77200	7338
Pilot-28	87321	62193	7361
Pilot-33	103019	76807	7374
Pilot-18	101662	90911	7496
Pilot-39	103726	82736	7356
Pilot-41	48235	23849	6819
Pilot-74	86463	78383	7430
Pilot-46	101785	85695	7447
Pilot-81	98984	92810	7454
Pilot-51	100225	70338	7387
Pilot-86	97785	91611	7438
Pilot-4	94536	59089	7280
Pilot-53	96112	73365	7355
Pilot-29	88424	39504	7152
Pilot-83	101910	81357	7462
Pilot-12	45626	42496	7165
Pilot-54	102520	93219	7427
Pilot-3	102062	93793	7434
Pilot-6	96220	52181	7275
Pilot-62	99159	88637	7454
Pilot-9	104131	98574	7478
Pilot-10	106881	87544	7438
Pilot-35	106010	92495	7407
Pilot-42	100378	56213	7248
Pilot-78	101988	95291	7432
Pilot-78	101855	95415	7505
Pilot-78	98987	103280	7467
Pilot-40	92972	84700	7406
Pilot-47	98038	61748	7234
Pilot-8	108868	114550	7572
Pilot-3	98911	89672	7478
Pilot-49	100424	80528	7438

## Sheet: All statistics
Protein data														ANOVA and Tukey's HSD test results for comparing sample clusters
Accession	Description	Gene Symbol	# Peptides	# PSMs	# Unique Peptides	# Protein Groups	Modifications	Biological Process	Cellular Component	Molecular Function	KEGG Pathways	Reactome Pathways	WikiPathways	Fvalues	p.v SampleCluster	p.adj SampleCluster	tukey(2-1)	tukey(3-1)	tukey(4-1)	tukey(5-1)	tukey(6-1)	tukey(3-2)	tukey(4-2)	tukey(5-2)	tukey(6-2)	tukey(4-3)	tukey(5-3)	tukey(6-3)	tukey(5-4)	tukey(6-4)	tukey(6-5)	Log2FC(2-1)	Log2FC(3-1)	Log2FC(4-1)	Log2FC(5-1)	Log2FC(6-1)	Log2FC(3-2)	Log2FC(4-2)	Log2FC(5-2)	Log2FC(6-2)	Log2FC(4-3)	Log2FC(5-3)	Log2FC(6-3)	Log2FC(5-4)	Log2FC(6-4)	Log2FC(6-5)	Log2FC.95%.CI(2-1)	Log2FC.95%.CI(3-1)	Log2FC.95%.CI(4-1)
A0A075B6H7	Probable non-functional immunoglobulin kappa variable 3-7 OS=Homo sapiens OX=9606 GN=IGKV3-7 PE=1 SV=1		4	265	2	1		response to stimulus						6.5883 (df=5)	3.28701e-05	0.000203801	0.0668084	0.0190714	0.997425	0.999804	0.854814	3.82086e-06	0.441069	0.757848	0.997084	0.0249519	0.219461	0.0295454	1	0.970314	0.983128	0.667802	-0.865158	0.129414	0.109804	0.473615	-1.53296	-0.538388	-0.557999	-0.194187	0.994572	0.974962	1.33877	-0.0196103	0.344201	0.363811	[-0.0271 , 1.3627]	[-1.6378 , -0.0925]	[-0.6973 , 0.9561]
A0A075B6H9	Immunoglobulin lambda variable 4-69 OS=Homo sapiens OX=9606 GN=IGLV4-69 PE=1 SV=1	IGLV4-69	3	98	3	1		response to stimulus	extracellular;membrane					2.904 (df=5)	0.0183009	0.0360241	0.06542	0.941679	0.864392	0.966169	0.0268253	0.613598	0.83216	0.9597	0.675242	0.999845	0.999956	0.156979	1	0.25476	0.464631	0.859569	0.31029	0.412381	0.418709	1.64137	-0.54928	-0.447188	-0.44086	0.781805	0.102092	0.10842	1.33108	0.00632836	1.22899	1.22267	[-0.0322 , 1.7514]	[-0.6796 , 1.3002]	[-0.6459 , 1.4706]
A0A075B6I0	Immunoglobulin lambda variable 8-61 OS=Homo sapiens OX=9606 GN=IGLV8-61 PE=3 SV=7	IGLV8-61	3	69	3	1		response to stimulus	extracellular;membrane					10.4662 (df=5)	8.25272e-08	1.42029e-06	0.374778	0.115358	0.622741	0.999873	6.87452e-06	0.968945	1	0.949407	7.64336e-08	0.973535	0.755418	2.43218e-08	0.970628	5.59185e-07	0.000449106	0.723079	1.05656	0.687922	0.155764	-3.46347	0.333482	-0.0351574	-0.567315	-4.18655	-0.368639	-0.900797	-4.52003	-0.532158	-4.15139	-3.61924	[-0.3539 , 1.8001]	[-0.1409 , 2.254]	[-0.5934 , 1.9692]
A0A075B6I9	Immunoglobulin lambda variable 7-46 OS=Homo sapiens OX=9606 GN=IGLV7-46 PE=3 SV=4	IGLV7-46	4	209	1	1	Methyl [K91]	response to stimulus	extracellular;membrane					7.3752 (df=5)	9.18599e-06	7.16134e-05	0.388331	0.912018	0.067785	0.0108683	0.685176	0.0924717	0.00063165	0.207358	0.118616	0.553505	0.00253019	0.971672	4.69701e-05	0.997927	0.003747	0.596014	-0.347183	-1.02499	1.82561	-0.77577	-0.943197	-1.621	1.2296	-1.37178	-0.677807	2.1728	-0.428587	2.8506	0.24922	-2.60138	[-0.3024 , 1.4944]	[-1.346 , 0.6517]	[-2.0938 , 0.0438]
A0A075B6J1	Immunoglobulin lambda variable 5-37 OS=Homo sapiens OX=9606 GN=IGLV5-37 PE=3 SV=1	IGLV5-37	2	12	1	1		response to stimulus	extracellular;membrane
A0A075B6J9	Immunoglobulin lambda variable 2-18 OS=Homo sapiens OX=9606 GN=IGLV2-18 PE=3 SV=2	IGLV2-18	4	336	2	1		response to stimulus	extracellular;membrane
A0A075B6K0	Immunoglobulin lambda variable 3-16 OS=Homo sapiens OX=9606 GN=IGLV3-16 PE=3 SV=2	IGLV3-16	6	436	1	1		response to stimulus	extracellular;membrane					5.6055 (df=4)	0.000558971	0.00208635	0.884432	0.106664	0.767699		0.0447967	0.0163288	0.996208		0.0107682	0.0181568		0.792953		0.00940847		-0.3406	0.98795	-0.500994		1.69076	1.32855	-0.160395		2.03136	-1.48894		0.702814		2.19176		[-1.3661 , 0.6849]	[-0.1269 , 2.1028]	[-1.6985 , 0.6965]
A0A075B6K4	Immunoglobulin lambda variable 3-10 OS=Homo sapiens OX=9606 GN=IGLV3-10 PE=3 SV=2	IGLV3-10	8	437	1	1		response to stimulus	extracellular;membrane
A0A075B6K5	Immunoglobulin lambda variable 3-9 OS=Homo sapiens OX=9606 GN=IGLV3-9 PE=3 SV=1	IGLV3-9	10	557	4	1		response to stimulus	extracellular;membrane					2.1327 (df=5)	0.0696255	0.107571	0.908125	0.307791	0.993726	1	0.0704796	0.862331	0.999653	0.991481	0.269679	0.79695	0.785783	0.769614	0.999246	0.239687	0.276514	-0.423549	-0.975261	-0.271156	-0.000122671	-1.97239	-0.551712	0.152393	0.423426	-1.54884	0.704105	0.975139	-0.997131	0.271033	-1.70124	-1.97227	[-1.629 , 0.7819]	[-2.3433 , 0.3928]	[-1.7053 , 1.163]
A0A075B6P5	Immunoglobulin kappa variable 2-28 OS=Homo sapiens OX=9606 GN=IGKV2-28 PE=3 SV=1	IGKV2D-28; IGKV2-28	13	1106	7	1	Methyl [K99]	cellular component movement;metabolic process;regulation of biological process;response to stimulus;transport	extracellular;membrane	catalytic activity		FCERI mediated Ca+2 mobilization; Scavenging of heme from plasma; Classical antibody-mediated complement activation; FCERI mediated MAPK activation; FCERI mediated NF-kB activation; CD22 mediated BCR regulation; Regulation of Complement cascade; Immunoregulatory interactions between a Lymphoid and a non-Lymphoid cell; Cell surface interactions at the vascular wall; FCGR activation; Regulation of …		2.1872 (df=5)	0.063311	0.0995003	0.442897	0.980944	0.999417	0.983187	0.489741	0.209452	0.843887	0.998856	0.0659432	0.945835	0.88629	0.811038	0.998309	0.437608	0.415183	0.655255	-0.278028	0.141756	0.417156	-1.07907	-0.933283	-0.513499	-0.238099	-1.73433	0.419785	0.695184	-0.801043	0.2754	-1.22083	-1.49623	[-0.3806 , 1.6911]	[-1.4298 , 0.8737]	[-1.0906 , 1.3741]
A0A075B6Q5	Immunoglobulin heavy variable 3-64 OS=Homo sapiens OX=9606 GN=IGHV3-64 PE=3 SV=1	LOC100291056; IGHV3-64	9	597	1	1		cell organization and biogenesis;defense response;metabolic process;regulation of biological process;response to stimulus	extracellular;membrane	catalytic activity;protein binding
A0A075B6R2	Immunoglobulin heavy variable 4-4 OS=Homo sapiens OX=9606 GN=IGHV4-4 PE=3 SV=2	IGHV4-4	11	875	2	1		cell organization and biogenesis;defense response;metabolic process;regulation of biological process;response to stimulus	extracellular;membrane	protein binding				9.1912 (df=5)	5.44979e-07	6.94016e-06	0.890051	0.997512	0.998994	0.122128	1.89252e-06	0.996144	0.995516	0.0279488	3.27869e-05	1	0.0858268	1.96088e-05	0.109024	3.00563e-05	1.24945e-07	0.235682	0.110552	0.0979669	-0.959025	2.17386	-0.125129	-0.137715	-1.19471	1.93818	-0.0125853	-1.06958	2.06331	-1.05699	2.07589	3.13289	[-0.4041 , 0.8755]	[-0.6008 , 0.8219]	[-0.6632 , 0.8591]
A0A075B6R9	Probable non-functional immunoglobulin kappa variable 2D-24 OS=Homo sapiens OX=9606 GN=IGKV2D-24 PE=1 SV=1		5	318	3	1	Methyl [K99]	response to stimulus						14.1446 (df=5)	5.33242e-10	2.08078e-08	0.998588	0.507861	0.657474	0.994926	1.26748e-09	0.328959	0.862389	0.974582	7.44414e-10	0.0609934	0.992569	6.94476e-07	0.69163	2.87034e-10	1.18614e-05	0.115571	-0.556052	0.516191	-0.259562	-3.67125	-0.671623	0.40062	-0.375132	-3.78682	1.07224	0.29649	-3.1152	-0.775752	-4.18744	-3.41169	[-0.7215 , 0.9526]	[-1.4867 , 0.3746]	[-0.4796 , 1.512]
A0A075B6S2	Immunoglobulin kappa variable 2D-29 OS=Homo sapiens OX=9606 GN=IGKV2D-29 PE=3 SV=1	IGKV2D-29	12	884	1	1	Methyl [K99]	response to stimulus	extracellular;membrane					1.1671 (df=3)	0.329836	0.390338	0.328823		1	0.952198			0.478394	0.959483					0.959333			0.717544		-0.00509251	0.366565			-0.722636	-0.350979					0.371657			[-0.3929 , 1.828]		[-1.2878 , 1.2776]
A0A075B6S5	Immunoglobulin kappa variable 1-27 OS=Homo sapiens OX=9606 GN=IGKV1-27 PE=3 SV=1	IGKV1-27	14	1497	1	1		response to stimulus	extracellular;membrane					1.1189 (df=5)	0.356784	0.416153	0.988953	1	0.960683	0.484838	0.998942	0.994976	0.999666	0.290361	0.977242	0.976727	0.534652	0.999041	0.258387	0.949152	0.889028	0.0972023	0.00315978	0.154226	-0.475523	-0.101417	-0.0940426	0.0570239	-0.572725	-0.198619	0.151066	-0.478683	-0.104576	-0.629749	-0.255643	0.374106	[-0.3573 , 0.5517]	[-0.5022 , 0.5085]	[-0.3865 , 0.695]
A0A075B6S9	Probable non-functional immunoglobulinn kappa variable 1-37 OS=Homo sapiens OX=9606 GN=IGKV1-37 PE=1 SV=7		7	935	3	1		response to stimulus						0.9934 (df=5)	0.427108	0.484622	0.766247	0.998431	0.999337	0.715832	0.936223	0.632463	0.973056	0.988377	0.999988	0.985632	0.601105	0.861985	0.882479	0.987118	0.999022	0.469234	-0.164212	0.143986	0.85219	0.561766	-0.633446	-0.325249	0.382956	0.0925316	0.308198	1.0164	0.725978	0.708205	0.41778	-0.290424	[-0.5588 , 1.4973]	[-1.3287 , 1.0003]	[-1.076 , 1.3639]
A0A087WSX0	Immunoglobulin lambda variable 5-45 OS=Homo sapiens OX=9606 GN=IGLV5-45 PE=3 SV=1	IGLV5-45	5	48	4	1	Methyl [K77]	response to stimulus	extracellular;membrane					3.6469 (df=5)	0.00494794	0.0124888	0.717179	0.974593	0.109951	0.928871	0.686384	0.372309	0.00531478	0.999994	0.988251	0.528529	0.741141	0.436165	0.120751	0.0379479	0.998805	-0.396421	0.23398	0.86426	-0.461483	-0.704261	0.630401	1.26068	-0.0650617	-0.30784	0.63028	-0.695462	-0.93824	-1.32574	-1.56852	-0.242778	[-1.2131 , 0.4202]	[-0.674 , 1.142]	[-0.1073 , 1.8358]
A0A087WSY4	Immunoglobulin heavy variable 4-30-2 OS=Homo sapiens OX=9606 GN=IGHV4-30-2 PE=3 SV=1	IGHV4-31	6	321	1	1		cell organization and biogenesis;defense response;metabolic process;regulation of biological process;response to stimulus	extracellular;membrane	protein binding				1.5407 (df=5)	0.186165	0.241932	0.993205	0.92396	0.878698	0.423315	0.939856	0.9974	0.989708	0.260527	0.99167	0.999978	0.173344	0.999783	0.153239	0.999991	0.270279	0.143441	0.2776	0.335396	-0.823043	0.404113	0.134159	0.191954	-0.966484	0.260672	0.0577957	-1.10064	0.126513	-1.15844	0.0687172	1.22716	[-0.602 , 0.8889]	[-0.5513 , 1.1065]	[-0.5515 , 1.2223]
A0A087WSY6	Immunoglobulin kappa variable 3D-15 OS=Homo sapiens OX=9606 GN=IGKV3D-15 PE=3 SV=6	IGKV3D-15	9	376	5	1		response to stimulus	extracellular;membrane					3.6232 (df=5)	0.00515782	0.0128893	0.998216	0.673576	0.999392	1	0.00157634	0.890989	1	0.99997	0.00428663	0.931956	0.955105	0.0484512	0.999984	0.00872658	0.033367	-0.103063	-0.402858	-0.0981177	-0.0249956	-1.69189	-0.299795	0.00494535	0.0780675	-1.58883	0.30474	0.377862	-1.28903	0.0731222	-1.59377	-1.6669	[-0.814 , 0.6079]	[-1.1934 , 0.3876]	[-0.9439 , 0.7477]
A0A087WSZ0	Immunoglobulin kappa variable 1D-8 OS=Homo sapiens OX=9606 GN=IGKV1D-8 PE=3 SV=6	IGKV1D-8	7	336	1	1		response to stimulus	extracellular;membrane
A0A096LP49	Coiled-coil domain-containing protein 187 OS=Homo sapiens OX=9606 GN=CCDC187 PE=2 SV=1	MGC50722; CCDC187	2	1279	2	1		cell organization and biogenesis		protein binding				7.5937 (df=5)	6.48253e-06	5.35708e-05	0.112629	0.427542	0.00699378	0.999998	0.914005	0.00147467	3.76793e-06	0.737301	0.996348	0.554188	0.809892	0.292548	0.166583	0.0206019	0.982027	0.799993	-0.643661	-1.32452	0.0558706	0.535373	-1.44365	-2.12451	-0.744122	-0.26462	-0.68086	0.699532	1.17903	1.38039	1.85989	0.479503	[-0.103 , 1.703]	[-1.6477 , 0.3603]	[-2.3988 , -0.2502]
A0A0A0MS15	Immunoglobulin heavy variable 3-49 OS=Homo sapiens OX=9606 GN=IGHV3-49 PE=3 SV=1	IGHV3-49	10	653	3	1		cell organization and biogenesis;defense response;metabolic process;regulation of biological process;response to stimulus	extracellular;membrane	protein binding				1.8373 (df=5)	0.114448	0.162602	0.321641	0.849558	0.999999	0.991674	0.774797	0.986138	0.486706	0.990594	0.141827	0.888573	0.999983	0.366912	0.990312	0.856542	0.686922	0.640894	0.406073	-0.0367819	0.314048	-0.705186	-0.234821	-0.677676	-0.326847	-1.34608	-0.442855	-0.0920255	-1.11126	0.350829	-0.668404	-1.01923	[-0.2694 , 1.5512]	[-0.6061 , 1.4182]	[-1.1198 , 1.0462]
A0A0A0MT36	Immunoglobulin kappa variable 6D-21 OS=Homo sapiens OX=9606 GN=IGKV6D-21 PE=3 SV=1	LOC652775; IGKV6D-21	3	686	1	1		response to stimulus	extracellular;membrane
A0A0A0MT89	Immunoglobulin kappa joining 1 OS=Homo sapiens OX=9606 GN=IGKJ1 PE=4 SV=2		2	32	2	1								4.1159 (df=5)	0.00219633	0.00641577	0.847855	0.996222	0.147491	0.77257	0.115399	0.993772	0.0154085	0.363264	0.0225018	0.0981271	0.626665	0.0761491	0.999204	0.966402	0.927664	0.320691	0.148561	-0.790706	-0.611686	-1.19201	-0.17213	-1.1114	-0.932377	-1.5127	-0.939266	-0.760246	-1.34057	0.17902	-0.401303	-0.580323	[-0.4764 , 1.1178]	[-0.727 , 1.0241]	[-1.7276 , 0.1462]
A0A0B4J1U3	Immunoglobulin lambda variable 1-36 OS=Homo sapiens OX=9606 GN=IGLV1-36 PE=1 SV=5	IGLV1-36	2	8	2	1		response to stimulus	extracellular;membrane					0.0152 (df=1)	0.903843	0.917038													0.903843															-0.112916
A0A0B4J1U7	Immunoglobulin heavy variable 6-1 OS=Homo sapiens OX=9606 GN=IGHV6-1 PE=3 SV=1	IGHV6-1	5	180	4	1		cell organization and biogenesis;defense response;metabolic process;regulation of biological process;response to stimulus	extracellular;membrane	protein binding				1.4325 (df=5)	0.221179	0.278596	0.999975	0.99789	0.969085	0.250694	0.997583	0.999797	0.989203	0.218817	0.999351	0.999369	0.183872	0.999986	0.125523	0.999999	0.33049	-0.0554582	-0.152915	-0.293803	1.18308	-0.242769	-0.0974565	-0.238344	1.23854	-0.187311	-0.140888	1.336	-0.0898546	1.47688	0.0510333	-1.42585	[-0.9714 , 0.8605]	[-1.1713 , 0.8655]	[-1.3835 , 0.7959]
A0A0B4J1V0	Immunoglobulin heavy variable 3-15 OS=Homo sapiens OX=9606 GN=IGHV3-15 PE=3 SV=1	IGHV3-15	11	1172	3	1	Methyl [K62; K86]	cell organization and biogenesis;defense response;metabolic process;regulation of biological process;response to stimulus	extracellular;membrane	protein binding				0.8439 (df=5)	0.522499	0.57387	0.998205	0.974511	0.960505	0.827803	0.998077	0.99918	0.855793	0.70053	0.985011	0.733606	0.588568	0.952244	0.991394	0.999993	0.990368	0.0960623	0.189751	-0.224797	-0.473344	-0.167214	0.093689	-0.320859	-0.569407	-0.263276	-0.414548	-0.663096	-0.356965	-0.248547	0.0575831	0.30613	[-0.5657 , 0.7578]	[-0.5461 , 0.9256]	[-1.0121 , 0.5625]
A0A0B4J1V1	Immunoglobulin heavy variable 3-21 OS=Homo sapiens OX=9606 GN=IGHV3-21 PE=1 SV=1	IGHV3-21	13	1474	1	1		cell organization and biogenesis;defense response;metabolic process;regulation of biological process;response to stimulus	extracellular;membrane	protein binding				1.645 (df=5)	0.157217	0.210575	0.999331	0.51366	0.941513	0.879191	0.916897	0.361749	0.990157	0.79188	0.843018	0.208752	1	0.999997	0.596431	0.657732	1	0.0645047	-0.360317	0.203533	-0.353387	-0.320442	-0.424822	0.139028	-0.417892	-0.384946	0.56385	0.00692944	0.0398753	-0.55692	-0.523974	0.0329458	[-0.4807 , 0.6097]	[-0.9665 , 0.2459]	[-0.4451 , 0.8522]
A0A0B4J1V2	Immunoglobulin heavy variable 2-26 OS=Homo sapiens OX=9606 GN=IGHV2-26 PE=3 SV=1	IGHV2-26	2	14	2	1		cell organization and biogenesis;defense response;metabolic process;regulation of biological process;response to stimulus	extracellular;membrane	protein binding				7.4158 (df=5)	8.60875e-06	6.78381e-05	0.949743	0.0193538	0.999251	0.990528	2.24142e-05	0.171051	0.998964	0.878975	0.000211583	0.155874	0.113367	0.0507747	0.969381	0.000243775	0.000371665	-0.412744	-1.69654	-0.196654	0.484217	-4.15578	-1.2838	0.21609	0.896961	-3.74303	1.49989	2.18076	-2.45924	0.680871	-3.95912	-4.64	[-1.7775 , 0.952]	[-3.214 , -0.1791]	[-1.8203 , 1.427]
A0A0B4J1V6	Immunoglobulin heavy variable 3-73 OS=Homo sapiens OX=9606 GN=IGHV3-73 PE=3 SV=1	IGHV3-73	8	707	3	1		cell organization and biogenesis;defense response;metabolic process;regulation of biological process;response to stimulus	extracellular;membrane	protein binding				0.2755 (df=4)	0.892905	0.907834	0.995501	0.988244	0.995225	0.982472		0.930477	0.957678	0.94587		0.99999	0.999383		0.998606			-0.15659	0.227083	0.183702	0.407575		0.383673	0.340292	0.564165		-0.0433802	0.180492		0.223872			[-1.3113 , 0.9981]	[-1.0751 , 1.5292]	[-1.1502 , 1.5176]
A0A0B4J1X5	Immunoglobulin heavy variable 3-74 OS=Homo sapiens OX=9606 GN=IGHV3-74 PE=3 SV=1	IGHV3-74	15	1663	1	1		cell organization and biogenesis;defense response;metabolic process;regulation of biological process;response to stimulus	extracellular;membrane	protein binding				4.3686 (df=5)	0.00140311	0.00443416	0.996524	0.987772	0.972477	0.97053	0.00169111	0.99996	0.999313	0.996482	0.000763465	0.999988	0.99932	0.0008606	0.999912	0.000868695	0.0050633	0.150328	0.219194	0.281483	0.412415	-2.13442	0.0688658	0.131155	0.262087	-2.28475	0.062289	0.193221	-2.35361	0.130932	-2.4159	-2.54683	[-0.7511 , 1.0518]	[-0.7831 , 1.2215]	[-0.791 , 1.3539]
A0A0B4J1Y8	Immunoglobulin lambda variable 9-49 OS=Homo sapiens OX=9606 GN=IGLV9-49 PE=1 SV=1	IGLV9-49	2	28	2	1		response to stimulus	extracellular;membrane	protein binding				0.9708 (df=5)	0.440811	0.497079	0.946672	0.650445	0.994281	0.983732	0.91157	0.980454	0.790033	0.99999	0.996663	0.461884	0.999618	1	0.920267	0.782966	0.99983	0.353283	0.665169	-0.251958	0.451965	0.675197	0.311886	-0.605241	0.0986821	0.321914	-0.917127	-0.213204	0.0100278	0.703923	0.927155	0.223232	[-0.7995 , 1.506]	[-0.6099 , 1.9402]	[-1.6124 , 1.1085]
A0A0B4J1Y9	Immunoglobulin heavy variable 3-72 OS=Homo sapiens OX=9606 GN=IGHV3-72 PE=3 SV=1	IGHV3-72	15	1420	2	1	Methyl [K62]	cell organization and biogenesis;defense response;metabolic process;regulation of biological process;response to stimulus	extracellular;membrane	protein binding				2.377 (df=5)	0.0456664	0.076236	0.378398	0.999489	0.677189	0.944569	0.689353	0.735626	0.0363349	0.999906	0.999542	0.591204	0.98599	0.841481	0.480319	0.204907	0.998077	0.448903	0.0834798	-0.405105	0.356426	0.57657	-0.365423	-0.854008	-0.0924762	0.127667	-0.488585	0.272947	0.49309	0.761532	0.981675	0.220143	[-0.2218 , 1.1197]	[-0.6623 , 0.8293]	[-1.2031 , 0.3929]
A0A0B4J2A2	Peptidyl-prolyl cis-trans isomerase A-like 4C OS=Homo sapiens OX=9606 GN=PPIAL4C PE=2 SV=1	PPIAL4C	11	5331	1	1	Methyl [K91]	metabolic process	cytoplasm	catalytic activity
A0A0B4J2D5	Glutamine amidotransferase-like class 1 domain-containing protein 3B, mitochondrial OS=Homo sapiens OX=9606 GN=GATD3B PE=1 SV=1	C21orf33; LOC102724023	17	1336	17	1	Methyl [K94; K141; K203; K233]		mitochondrion				Gastric Cancer Network 1	3.6154 (df=5)	0.00522866	0.0130175	0.994226	0.304519	0.0710292	0.999999	0.241101	0.137665	0.0268668	0.999917	0.136177	0.974915	0.746046	0.962626	0.431813	0.999804	0.488007	-0.0758265	0.324508	0.462495	-0.0209279	0.532186	0.400334	0.538321	0.0548986	0.608012	0.137987	-0.345436	0.207678	-0.483423	0.0696913	0.553114	[-0.4839 , 0.3323]	[-0.1293 , 0.7783]	[-0.023 , 0.948]
A0A0B4J2D9	Immunoglobulin kappa variable 1D-13 OS=Homo sapiens OX=9606 GN=IGKV1D-13 PE=3 SV=1	IGKV1D-13; IGKV1-13	9	1124	1	1		response to stimulus	extracellular;membrane
A0A0B4J2H0	Immunoglobulin heavy variable 1-69D OS=Homo sapiens OX=9606 GN=IGHV1-69D PE=1 SV=1	IGHV1-69D	12	804	5	1	Methyl [K38]	cell organization and biogenesis;defense response;metabolic process;regulation of biological process;response to stimulus	extracellular;membrane	protein binding				4.3193 (df=5)	0.00152862	0.00476273	0.0812587	0.995353	0.0166324	0.910182	0.9824	0.426065	0.917916	0.115843	0.227126	0.119482	0.791091	0.924288	0.0333663	0.0733974	0.999856	0.582184	0.122967	0.842553	-0.373844	-0.253696	-0.459217	0.260369	-0.956028	-0.83588	0.719586	-0.496811	-0.376663	-1.2164	-1.09625	0.120148	[-0.0414 , 1.2057]	[-0.5703 , 0.8163]	[0.1007 , 1.5844]
A0A0C4DH24	Immunoglobulin kappa variable 6-21 OS=Homo sapiens OX=9606 GN=IGKV6-21 PE=3 SV=1	IGKV6-21	3	692	1	1		response to stimulus	extracellular;membrane
A0A0C4DH25	Immunoglobulin kappa variable 3D-20 OS=Homo sapiens OX=9606 GN=IGKV3D-20 PE=3 SV=1	IGKV3D-20	16	1157	1	1		cellular component movement;metabolic process;regulation of biological process;response to stimulus;transport	extracellular;membrane	catalytic activity		FCERI mediated Ca+2 mobilization; Scavenging of heme from plasma; Classical antibody-mediated complement activation; FCERI mediated MAPK activation; FCERI mediated NF-kB activation; CD22 mediated BCR regulation; Regulation of Complement cascade; Immunoregulatory interactions between a Lymphoid and a non-Lymphoid cell; Cell surface interactions at the vascular wall; FCGR activation; Regulation of …		4.0442 (df=5)	0.00246853	0.00704771	0.283381	0.940392	0.540576	0.993383	0.132819	0.0770021	0.999999	0.984445	0.0050126	0.2029	0.881355	0.459055	0.992744	0.0125187	0.181701	0.542573	-0.260737	0.513429	0.244191	-1.09847	-0.80331	-0.0291447	-0.298382	-1.64104	0.774165	0.504928	-0.837729	-0.269238	-1.61189	-1.34266	[-0.2013 , 1.2864]	[-1.0878 , 0.5663]	[-0.3715 , 1.3984]
A0A0C4DH29	Immunoglobulin heavy variable 1-3 OS=Homo sapiens OX=9606 GN=IGHV1-3 PE=3 SV=1	IGHV1-3	10	804	1	1	Methyl [K38]	cell organization and biogenesis;defense response;metabolic process;regulation of biological process;response to stimulus	extracellular;membrane	protein binding				1.9049 (df=5)	0.103869	0.149759	0.688922	0.98922	0.744661	0.752531	0.999886	0.429342	0.126432	0.997639	0.900848	0.981243	0.549257	0.999992	0.267967	0.989683	0.841457	0.635922	-0.299467	-0.695632	0.957645	-0.186432	-0.935389	-1.33155	0.321723	-0.822354	-0.396164	1.25711	0.113035	1.65328	0.5092	-1.14408	[-0.6368 , 1.9087]	[-1.7132 , 1.1142]	[-2.1819 , 0.7906]
A0A0C4DH31	Immunoglobulin heavy variable 1-18 OS=Homo sapiens OX=9606 GN=IGHV1-18 PE=3 SV=1	IGHV1-18	10	859	2	1	Methyl [K38]	cell organization and biogenesis;defense response;metabolic process;regulation of biological process;response to stimulus	extracellular;membrane	protein binding				1.7795 (df=5)	0.125999	0.175965	0.118031	0.912219	0.931673	0.986044	1	0.809395	0.849196	0.286051	0.710243	1	0.81164	0.992159	0.826891	0.992919	0.994218	0.733908	0.322536	0.323944	-0.322639	0.0232868	-0.411372	-0.409964	-1.05655	-0.710621	0.00140764	-0.645175	-0.299249	-0.646583	-0.300657	0.345926	[-0.1012 , 1.569]	[-0.606 , 1.251]	[-0.6695 , 1.3174]
A0A0C4DH32	Immunoglobulin heavy variable 3-20 OS=Homo sapiens OX=9606 GN=IGHV3-20 PE=3 SV=2	IGHV3-20	7	399	2	1		cell organization and biogenesis;defense response;metabolic process;regulation of biological process;response to stimulus	extracellular;membrane	protein binding				1.4708 (df=4)	0.219269	0.27677	0.999997	0.596504	0.676994	0.999996		0.599031	0.734783	1		0.122643	0.8699		0.932492			0.0282191	-0.76343	0.730046	0.0503589		-0.791649	0.701827	0.0221398		1.49348	0.813789		-0.679687			[-1.2819 , 1.3383]	[-2.2324 , 0.7055]	[-0.8098 , 2.2699]
A0A0C4DH34	Immunoglobulin heavy variable 4-28 OS=Homo sapiens OX=9606 GN=IGHV4-28 PE=3 SV=1	IGHV4-28	5	513	1	1		cell organization and biogenesis;defense response;metabolic process;regulation of biological process;response to stimulus	extracellular;membrane	protein binding				1.1329 (df=5)	0.349516	0.408918	0.716918	0.994911	0.977872	0.99825	0.971058	0.505899	0.429489	0.820795	1	0.999938	1	0.895268	1	0.843256	0.940157	0.400821	-0.165974	-0.245212	-0.204497	0.376069	-0.566795	-0.646033	-0.605318	-0.0247522	-0.0792377	-0.038523	0.542043	0.0407147	0.621281	0.580566	[-0.4246 , 1.2263]	[-1.0838 , 0.7518]	[-1.2272 , 0.7368]
A0A0C4DH35	Probable non-functional immunoglobulin heavy variable 3-35 OS=Homo sapiens OX=9606 GN=IGHV3-35 PE=1 SV=1	IGHV3-35	9	723	2	1		cell organization and biogenesis;defense response;metabolic process;regulation of biological process;response to stimulus		protein binding				1.9462 (df=5)	0.0959594	0.140459	0.116854	0.903517	0.445421	1	0.396788	0.789936	0.999224	0.643011	0.998992	0.966475	0.985975	0.840363	0.831415	0.991432	0.667443	0.972351	0.429435	0.812863	-0.00221384	1.21076	-0.542916	-0.159488	-0.974565	0.23841	0.383428	-0.431649	0.781326	-0.815077	0.397898	1.21297	[-0.1325 , 2.0772]	[-0.7787 , 1.6375]	[-0.4762 , 2.1019]
A0A0C4DH36	Probable non-functional immunoglobulin heavy variable 3-38 OS=Homo sapiens OX=9606 GN=IGHV3-38 PE=1 SV=1		4	175	1	1		cell organization and biogenesis;defense response;metabolic process;regulation of biological process;response to stimulus		protein binding
A0A0C4DH38	Immunoglobulin heavy variable 5-51 OS=Homo sapiens OX=9606 GN=IGHV5-51 PE=3 SV=1	IGHV5-51	6	335	2	1		cell organization and biogenesis;defense response;metabolic process;regulation of biological process;response to stimulus	extracellular;membrane	protein binding				5.6075 (df=5)	0.000168046	0.000783536	0.00083291	0.999974	0.967198	0.999999	0.999998	0.00299321	0.000817104	0.132393	0.196017	0.992687	1	0.999939	0.997947	0.989933	0.99999	1.01372	-0.047537	-0.227491	-0.033828	0.0443684	-1.06126	-1.24121	-1.04755	-0.969355	-0.179954	0.013709	0.0919053	0.193663	0.27186	0.0781963	[0.3142 , 1.7133]	[-0.8253 , 0.7303]	[-1.0597 , 0.6047]
A0A0C4DH42	Immunoglobulin heavy variable 3-66 OS=Homo sapiens OX=9606 GN=IGHV3-66 PE=3 SV=1	IGHV3-66	12	1107	1	1		cell organization and biogenesis;defense response;metabolic process;regulation of biological process;response to stimulus	extracellular;membrane	protein binding
A0A0C4DH43	Immunoglobulin heavy variable 2-70D OS=Homo sapiens OX=9606 GN=IGHV2-70D PE=3 SV=1	IGHV2-70D	3	220	1	1		cell organization and biogenesis;defense response;metabolic process;regulation of biological process;response to stimulus	extracellular;membrane	protein binding				0.6079 (df=3)	0.613111	0.656474	0.794109			0.752172	0.9941			0.976397	0.845622						0.763462	0.379102			0.653229	-0.167243			0.274127	-0.546345						-0.820472	[-0.7171 , 1.4753]
A0A0C4DH67	Immunoglobulin kappa variable 1-8 OS=Homo sapiens OX=9606 GN=IGKV1-8 PE=3 SV=1	IGKV1-8	9	1023	1	1		response to stimulus	extracellular;membrane
A0A0C4DH72	Immunoglobulin kappa variable 1-6 OS=Homo sapiens OX=9606 GN=IGKV1-6 PE=3 SV=1	IGKV1-6	13	1290	1	1		response to stimulus	extracellular;membrane					8.7575 (df=5)	1.05425e-06	1.22498e-05	0.997623	0.999999	0.940275	0.986901	2.24288e-07	0.999656	0.994894	0.946098	9.76647e-07	0.974378	0.984453	1.09856e-06	0.840629	1.92456e-05	1.21339e-05	-0.103454	-0.023844	-0.252186	0.256045	-2.48039	0.0796104	-0.148731	0.359499	-2.37694	-0.228342	0.279889	-2.45655	0.50823	-2.22821	-2.73644	[-0.7755 , 0.5686]	[-0.7711 , 0.7234]	[-1.0518 , 0.5474]
A0A0C4DH73	Immunoglobulin kappa variable 1-12 OS=Homo sapiens OX=9606 GN=IGKV1-12 PE=3 SV=1	IGKV1-12; IGKV1D-12	13	1226	2	1		cellular component movement;metabolic process;regulation of biological process;response to stimulus;transport	extracellular;membrane	catalytic activity		FCERI mediated Ca+2 mobilization; Scavenging of heme from plasma; Classical antibody-mediated complement activation; FCERI mediated MAPK activation; FCERI mediated NF-kB activation; CD22 mediated BCR regulation; Regulation of Complement cascade; Immunoregulatory interactions between a Lymphoid and a non-Lymphoid cell; Cell surface interactions at the vascular wall; FCGR activation; Regulation of …		1.7895 (df=5)	0.124409	0.173978	0.999408	1	0.999671	0.622183	0.116033	0.999893	1	0.762096	0.195677	0.99993	0.69345	0.163975	0.804618	0.251554	0.970706	-0.122465	-0.0246873	-0.125755	-0.949487	-1.55885	0.0977779	-0.00328983	-0.827022	-1.43638	-0.101068	-0.9248	-1.53416	-0.823732	-1.43309	-0.609359	[-1.1853 , 0.9403]	[-1.1757 , 1.1263]	[-1.3562 , 1.1047]
A0A0J9YVY3	Immunoglobulin heavy variable 7-4-1 OS=Homo sapiens OX=9606 GN=IGHV7-4-1 PE=3 SV=1	IGHV7-4-1	5	529	2	1	Methyl [K38]	response to stimulus	extracellular;membrane					1.4329 (df=5)	0.221212	0.278596	0.999999	0.44521	0.990859	1	0.742187	0.434801	0.995527	0.999999	0.724945	0.298935	0.880316	0.99977	0.998313	0.574199	0.891517	0.0256081	-0.620604	0.215797	-0.0191112	-0.786288	-0.646212	0.190189	-0.0447193	-0.811897	0.836402	0.601493	-0.165684	-0.234909	-1.00209	-0.767177	[-0.8587 , 0.91]	[-1.6039 , 0.3627]	[-0.8363 , 1.2679]
A0A0J9YX35	Immunoglobulin heavy variable 3-64D OS=Homo sapiens OX=9606 GN=IGHV3-64D PE=3 SV=1	IGHV3-64D	15	1163	1	1		response to stimulus	extracellular;membrane	catalytic activity
A0A0J9YXX1	Immunoglobulin heavy variable 5-10-1 OS=Homo sapiens OX=9606 GN=IGHV5-10-1 PE=3 SV=1	IGHV5-A; IGHV5-10-1	5	338	1	1		response to stimulus	extracellular;membrane					25.8806 (df=1)	0.000109789	0.000557889												0.000109789															4.10046
A0AV96	RNA-binding protein 47 OS=Homo sapiens OX=9606 GN=RBM47 PE=1 SV=2	RBM47	5	16	5	1		cell differentiation;metabolic process	nucleus	RNA binding			TYROBP Causal Network	3.199 (df=5)	0.0110287	0.0238732	0.893163	0.547294	0.999999	0.99755	0.00845092	0.980454	0.92125	0.910645	0.0537855	0.644074	0.727616	0.192492	0.999106	0.0146102	0.0463444	-0.432936	-0.756848	0.0475987	0.341887	-2.43782	-0.323911	0.480535	0.774824	-2.00488	0.804446	1.09873	-1.68097	0.294289	-2.48542	-2.7797	[-1.6184 , 0.7525]	[-2.0704 , 0.5567]	[-1.3553 , 1.4505]
A0AVT1	Ubiquitin-like modifier-activating enzyme 6 OS=Homo sapiens OX=9606 GN=UBA6 PE=1 SV=1	UBA6	45	1459	45	1	Methyl [K976]	metabolic process;response to stimulus	cytoplasm;cytosol	catalytic activity;nucleotide binding;protein binding	Ubiquitin mediated proteolysis	Synthesis of active ubiquitin: roles of E1 and E2 enzymes; Antigen processing: Ubiquitination & Proteasome degradation		5.8879 (df=5)	0.000104907	0.000535318	1	0.488201	0.911476	0.303531	7.75292e-05	0.51873	0.918323	0.315579	9.77907e-05	0.99207	0.947366	0.0086445	0.794762	0.00309109	0.279183	-0.0019914	0.468436	0.287012	0.851109	1.98222	0.470427	0.289004	0.8531	1.98421	-0.181424	0.382673	1.51378	0.564097	1.69521	1.13111	[-0.695 , 0.691]	[-0.3021 , 1.2389]	[-0.5374 , 1.1115]
A0FGR8-2	Isoform 2 of Extended synaptotagmin-2 OS=Homo sapiens OX=9606 GN=ESYT2	ESYT2	33	1707	32	1		metabolic process;transport	membrane	metal ion binding;protein binding				4.0264 (df=5)	0.00254618	0.00722094	0.293356	0.350615	0.874107	0.90515	0.0241061	0.999998	0.0660743	0.999962	0.391232	0.0864136	0.999863	0.474829	0.554337	0.00568753	0.564299	-0.314845	-0.332294	0.198011	-0.26494	-0.816253	-0.0174488	0.512856	0.0499054	-0.501408	0.530305	0.0673542	-0.483959	-0.462951	-1.01426	-0.551313	[-0.7506 , 0.1209]	[-0.8168 , 0.1522]	[-0.3204 , 0.7164]
A0M8Q6	Immunoglobulin lambda constant 7 OS=Homo sapiens OX=9606 GN=IGLC7 PE=1 SV=3	IGLC7	18	2699	4	1	Methyl [K23; K65; K80; K98]	cell organization and biogenesis;cellular component movement;defense response;metabolic process;regulation of biological process;response to stimulus;transport	extracellular;membrane	catalytic activity;protein binding		FCERI mediated Ca+2 mobilization; Scavenging of heme from plasma; Classical antibody-mediated complement activation; FCERI mediated MAPK activation; FCERI mediated NF-kB activation; CD22 mediated BCR regulation; Regulation of Complement cascade; Immunoregulatory interactions between a Lymphoid and a non-Lymphoid cell; Cell surface interactions at the vascular wall; FCGR activation; Regulation of …		3.7414 (df=4)	0.00802546	0.0184272	0.271655	0.559543	0.821569		0.0756315	0.997625	0.0669657		0.648627	0.176013		0.540735		0.0209195		0.490583	0.401151	-0.305485		1.0478	-0.0894316	-0.796068		0.557221	-0.706636		0.646653		1.35329		[-0.1923 , 1.1734]	[-0.3423 , 1.1446]	[-1.1049 , 0.4939]
A0MZ66	Shootin-1 OS=Homo sapiens OX=9606 GN=SHTN1 PE=1 SV=4	KIAA1598; SHTN1	25	377	25	1		cell organization and biogenesis;cellular component movement;development;regulation of biological process;response to stimulus	cytoplasm;cytoskeleton	protein binding		Recycling pathway of L1		1.6696 (df=5)	0.151028	0.20397	0.917896	0.318084	0.638931	0.980676	0.880263	0.868115	0.983188	0.999996	0.563288	0.999307	0.990935	0.200392	0.999421	0.347922	0.732757	0.147078	0.338231	0.270693	0.178955	-0.278494	0.191154	0.123615	0.0318767	-0.425571	-0.0675381	-0.159277	-0.616725	-0.0917387	-0.549187	-0.457448	[-0.2836 , 0.5778]	[-0.1406 , 0.8171]	[-0.2417 , 0.7831]
A0PJW8	Death-associated protein-like 1 OS=Homo sapiens OX=9606 GN=DAPL1 PE=1 SV=2	DAPL1	6	25	6	1	Met-loss+Acetyl [N-Term]	cell communication;cell death;cell differentiation;regulation of biological process;response to stimulus		protein binding				3.273 (df=5)	0.00953885	0.0212275	0.759666	0.755595	0.999983	0.460297	0.00814236	0.999993	0.806178	0.909791	0.0803573	0.789609	0.946626	0.124485	0.479668	0.0133056	0.766168	0.287005	0.3208	-0.0417329	0.665994	1.30025	0.0337949	-0.328738	0.378988	1.01324	-0.362533	0.345193	0.979447	0.707726	1.34198	0.634254	[-0.336 , 0.91]	[-0.3719 , 1.0135]	[-0.7829 , 0.6995]
A1A5D9	BICD family-like cargo adapter 2 OS=Homo sapiens OX=9606 GN=BICDL2 PE=1 SV=2	CCDC64B; BICDL2	2	12	2	1				protein binding				0.9918 (df=3)	0.402192	0.460938	0.607516	0.836226	0.968376			0.992576	0.450083			0.667171						-0.555562	-0.413005	0.229791			0.142558	0.785353			0.642795						[-1.7419 , 0.6308]	[-1.7122 , 0.8862]	[-1.1006 , 1.5602]
A1IGU5	Rho guanine nucleotide exchange factor 37 OS=Homo sapiens OX=9606 GN=ARHGEF37 PE=2 SV=2	ARHGEF37	3	13	3	1		regulation of biological process;response to stimulus	cytoplasm	protein binding		G alpha (12/13) signalling events; NRAGE signals death through JNK; Signalling by NGF; Rho GTPase cycle		0.6819 (df=5)	0.638466	0.68003	1	0.999861	0.901242	0.993334	0.892216	0.999825	0.901212	0.994114	0.898271	0.975974	0.982495	0.848299	0.836045	0.5805	0.997598	-0.00620109	0.0936921	0.417701	-0.320166	-0.673115	0.0998932	0.423902	-0.313965	-0.666914	0.324009	-0.413858	-0.766807	-0.737867	-1.09082	-0.352949	[-0.9927 , 0.9803]	[-0.9995 , 1.1869]	[-0.7498 , 1.5852]
A1L0T0	2-hydroxyacyl-CoA lyase 2 OS=Homo sapiens OX=9606 GN=ILVBL PE=1 SV=2	ILVBL	34	1329	34	1	Methyl [K174; K221; K303; K507; K577]		membrane	catalytic activity;metal ion binding;protein binding				1.0865 (df=5)	0.373964	0.433215	0.923346	0.978345	0.812094	0.996572	0.947466	0.999989	0.343274	0.999999	0.999559	0.509646	1	0.998617	0.811273	0.584422	0.999584	0.2022	0.166455	-0.306489	0.171893	0.316016	-0.0357447	-0.508689	-0.0303073	0.113815	-0.472945	0.00543736	0.14956	0.478382	0.622505	0.144123	[-0.4003 , 0.8047]	[-0.5035 , 0.8364]	[-1.0233 , 0.4103]
A1L188	NADH dehydrogenase [ubiquinone] 1 alpha subcomplex assembly factor 8 OS=Homo sapiens OX=9606 GN=NDUFAF8 PE=1 SV=1	C17orf89; NDUFAF8	1	6	1	1		cell organization and biogenesis	mitochondrion	protein binding
A1X283	SH3 and PX domain-containing protein 2B OS=Homo sapiens OX=9606 GN=SH3PXD2B PE=1 SV=3	SH3PXD2B	20	471	18	1		cell differentiation;cell organization and biogenesis;metabolic process;regulation of biological process	cytoplasm	enzyme regulator activity;protein binding				3.0975 (df=5)	0.0129814	0.0272513	0.999999	0.746101	0.659843	0.999056	0.0575002	0.722286	0.732723	0.999596	0.0725065	0.130378	0.838435	0.00778831	0.988875	0.547941	0.398232	-0.0201608	0.324139	-0.382587	-0.135536	-1.04728	0.344299	-0.362426	-0.115375	-1.02712	-0.706725	-0.459675	-1.37142	0.24705	-0.66469	-0.91174	[-0.6421 , 0.6018]	[-0.3674 , 1.0156]	[-1.1225 , 0.3573]
A2NJV5	Immunoglobulin kappa variable 2-29 OS=Homo sapiens OX=9606 GN=IGKV2-29 PE=3 SV=2	IGKV2-29	13	899	2	1	Methyl [K99]	cellular component movement;metabolic process;regulation of biological process;response to stimulus;transport	extracellular;membrane	catalytic activity		FCERI mediated Ca+2 mobilization; Scavenging of heme from plasma; Classical antibody-mediated complement activation; FCERI mediated MAPK activation; FCERI mediated NF-kB activation; CD22 mediated BCR regulation; Regulation of Complement cascade; Immunoregulatory interactions between a Lymphoid and a non-Lymphoid cell; Cell surface interactions at the vascular wall; FCGR activation; Regulation of …		1.741 (df=5)	0.134286	0.185373	0.839246	0.49349	0.855226	0.126026	0.644939	0.984597	0.999989	0.461879	0.961946	0.997731	0.772383	0.99908	0.599499	0.984292	0.971495	0.35465	0.583761	0.409707	1.29337	0.781681	0.229111	0.0550567	0.938724	0.427031	-0.174054	0.709614	0.197921	0.883668	0.371975	-0.511693	[-0.513 , 1.2223]	[-0.3809 , 1.5485]	[-0.6225 , 1.4419]
A2RRP1	Neuroblastoma-amplified sequence OS=Homo sapiens OX=9606 GN=NBAS PE=1 SV=2	NBAS	35	395	35	1		metabolic process;regulation of biological process;transport	cytoplasm;cytosol;endoplasmic reticulum;membrane	protein binding		COPI-dependent Golgi-to-ER retrograde traffic		4.7768 (df=5)	0.000692599	0.0024966	0.989113	0.687379	0.393877	0.000315205	0.997423	0.950883	0.747368	0.00141631	0.965239	0.995903	0.0141049	0.76419	0.0493139	0.562943	0.00349087	0.121892	0.319194	0.449125	1.51147	-0.153613	0.197301	0.327232	1.38958	-0.275505	0.129931	1.19228	-0.472807	1.06235	-0.602738	-1.66508	[-0.4499 , 0.6937]	[-0.3166 , 0.9549]	[-0.2311 , 1.1294]
A2RTX5	Threonine--tRNA ligase 2, cytoplasmic OS=Homo sapiens OX=9606 GN=TARS3 PE=1 SV=1	TARSL2	8	230	4	1	Met-loss+Acetyl [N-Term]	metabolic process	cytoplasm	catalytic activity;nucleotide binding;protein binding	Aminoacyl-tRNA biosynthesis			1.2522 (df=5)	0.293152	0.354689	0.649902	0.271305	0.999745	0.992173	0.999892	0.957121	0.935154	0.999629	0.905244	0.619854	0.957661	0.668861	0.999335	0.998779	0.990041	-0.410037	-0.689355	-0.0931225	-0.267025	0.12069	-0.279318	0.316914	0.143012	0.530727	0.596232	0.42233	0.810045	-0.173903	0.213812	0.387715	[-1.196 , 0.376]	[-1.6245 , 0.2458]	[-1.0542 , 0.8679]
A2RUB6	Coiled-coil domain-containing protein 66 OS=Homo sapiens OX=9606 GN=CCDC66 PE=1 SV=4	CCDC66	3	26	1	1								2.3764 (df=4)	0.0589488	0.0936737	0.999974	0.183614	0.755029	0.990475		0.247808	0.724698	0.994697		0.0327364	0.885461		0.755401			-0.0396685	-0.946787	0.545004	-0.304108		-0.907119	0.584672	-0.264439		1.49179	0.642679		-0.849112			[-1.1112 , 1.0318]	[-2.1382 , 0.2446]	[-0.7298 , 1.8198]
A2RUS2	DENN domain-containing protein 3 OS=Homo sapiens OX=9606 GN=DENND3 PE=1 SV=2	DENND3	4	20	4	1		metabolic process;transport	cytoplasm;cytosol	protein binding		RAB GEFs exchange GTP for GDP on RABs		0.9586 (df=5)	0.448227	0.503729	0.999141	0.841679	0.988351	0.973471	0.7264	0.960298	0.942589	0.993251	0.83799	0.617983	1	0.98448	0.886409	0.545425	0.996531	-0.137274	-0.498677	0.283635	-0.541465	-0.999163	-0.361403	0.420909	-0.404191	-0.861889	0.782312	-0.0427881	-0.500486	-0.8251	-1.2828	-0.457698	[-1.24 , 0.9654]	[-1.7247 , 0.7274]	[-1.0283 , 1.5955]
A3KMH1	von Willebrand factor A domain-containing protein 8 OS=Homo sapiens OX=9606 GN=VWA8 PE=1 SV=2	VWA8	39	436	38	1			mitochondrion	catalytic activity;nucleotide binding				3.7912 (df=5)	0.00384171	0.0101385	0.992937	0.907185	0.800337	0.999997	0.0103234	0.671705	0.536729	0.997813	0.0305928	0.999761	0.995178	0.00232802	0.980719	0.00168471	0.0738557	-0.0907376	0.183235	0.242196	0.0322807	-0.954948	0.273973	0.332934	0.123018	-0.864211	0.0589614	-0.150954	-1.13818	-0.209916	-1.19714	-0.987229	[-0.5584 , 0.3769]	[-0.3367 , 0.7032]	[-0.3142 , 0.7986]
A3KN83	Protein strawberry notch homolog 1 OS=Homo sapiens OX=9606 GN=SBNO1 PE=1 SV=1	SBNO1	10	137	10	1		regulation of biological process						5.5595 (df=5)	0.000182206	0.000836201	0.396693	0.0942091	0.906142	0.736872	4.50169e-05	0.9442	0.992817	0.999833	0.00327467	0.774897	0.999503	0.0294195	0.989397	0.00207219	0.0698102	-0.579268	-0.892286	-0.369818	-0.715535	-2.58765	-0.313018	0.20945	-0.136267	-2.00838	0.522468	0.176751	-1.69537	-0.345717	-2.21783	-1.87212	[-1.4588 , 0.3003]	[-1.8702 , 0.0857]	[-1.4162 , 0.6766]
A4D1E9	GTP-binding protein 10 OS=Homo sapiens OX=9606 GN=GTPBP10 PE=1 SV=1	GTPBP10	4	28	4	1		metabolic process	chromosome;mitochondrion;nucleus	catalytic activity;metal ion binding;nucleotide binding;protein binding;RNA binding				3.6464 (df=5)	0.00512352	0.0128299	0.274854	0.192531	0.846234	0.268156	0.993565	0.998284	0.0534233	0.955053	0.542828	0.0376687	0.994193	0.421548	0.0761656	0.999976	0.345686	-0.634508	-0.781487	0.403799	-1.06859	0.301831	-0.146979	1.03831	-0.434083	0.936339	1.18529	-0.287104	1.08332	-1.47239	-0.101969	1.37042	[-1.4981 , 0.2291]	[-1.7591 , 0.1961]	[-0.5982 , 1.4058]
A4D1P6	WD repeat-containing protein 91 OS=Homo sapiens OX=9606 GN=WDR91 PE=1 SV=2	WDR91	27	642	27	1	Met-loss+Acetyl [N-Term]; Methyl [K461]	metabolic process;regulation of biological process;transport	cytosol;endosome;membrane	enzyme regulator activity;protein binding				5.5122 (df=5)	0.000197381	0.000891819	0.998476	0.00836156	0.148473	0.991607	0.0266624	0.00377874	0.0805815	0.963979	0.0152437	0.972167	0.58685	0.964375	0.905086	0.764051	0.366974	0.102387	-0.984766	-0.732024	-0.252238	-1.35203	-1.08715	-0.834411	-0.354625	-1.45442	0.252742	0.732528	-0.367264	0.479786	-0.620006	-1.09979	[-0.6275 , 0.8323]	[-1.7963 , -0.1732]	[-1.6004 , 0.1363]
A4QMS7	Uncharacterized protein C5orf49 OS=Homo sapiens OX=9606 GN=C5orf49 PE=1 SV=1	C5orf49	2	115	2	1								2.8805 (df=5)	0.0189925	0.037185	0.237632	0.0452342	0.997724	0.878206	0.999996	0.938975	0.225624	0.999965	0.85473	0.0523528	0.971728	0.533112	0.780209	0.998661	0.973924	0.462252	0.682734	-0.109996	0.393713	0.0435108	0.220482	-0.572248	-0.0685393	-0.418741	-0.79273	-0.289021	-0.639223	0.503709	0.153507	-0.350202	[-0.1438 , 1.0684]	[0.0088 , 1.3566]	[-0.8311 , 0.6111]
A5A3E0	POTE ankyrin domain family member F OS=Homo sapiens OX=9606 GN=POTEF PE=1 SV=2	POTEF	62	39651	1	1	Methyl [K1073]		cytoplasm	protein binding				3.9616 (df=4)	0.00569779	0.0139146	0.923183	0.578797	0.0488294	0.315487		0.950793	0.24649	0.134004		0.699022	0.0566722		0.00499794			0.259505	0.523107	1.06727	-1.02278		0.263601	0.80776	-1.28228		0.544159	-1.54588		-2.09004			[-0.6234 , 1.1424]	[-0.4651 , 1.5114]	[0.0036 , 2.131]
A5PLL7	Plasmanylethanolamine desaturase OS=Homo sapiens OX=9606 GN=PEDS1 PE=1 SV=3	TMEM189; TMEM189-UBE2V1	2	14	2	1		metabolic process	cytoplasm;endoplasmic reticulum;membrane	catalytic activity;protein binding				0.5997 (df=4)	0.663966	0.702679	0.970953	0.947042	0.951464	0.998666		0.712024	0.999789	0.96723		0.697685	0.999669		0.94984			-0.204466	0.26172	-0.272659	0.150906		0.466186	-0.0681929	0.355372		-0.534379	-0.110815		0.423565			[-1.1219 , 0.713]	[-0.7306 , 1.254]	[-1.3325 , 0.7871]
A5PLN9	Trafficking protein particle complex subunit 13 OS=Homo sapiens OX=9606 GN=TRAPPC13 PE=1 SV=2	C5orf44; TRAPPC13	5	66	5	1			cytosol	protein binding		RAB GEFs exchange GTP for GDP on RABs		0.4973 (df=5)	0.777392	0.805199	0.974521	0.999673	0.874799	0.99953	0.908706	0.999102	0.997125	0.974954	0.992253	0.974248	0.996452	0.968635	0.913098	0.999902	0.904697	0.345143	0.152091	0.607382	-0.252699	0.805886	-0.193052	0.262239	-0.597842	0.460743	0.455291	-0.40479	0.653795	-0.860081	0.198504	1.05858	[-0.9934 , 1.6837]	[-1.3362 , 1.6403]	[-0.985 , 2.1998]
A5YKK6	CCR4-NOT transcription complex subunit 1 OS=Homo sapiens OX=9606 GN=CNOT1 PE=1 SV=2	CNOT1	59	1194	58	1		development;metabolic process;regulation of biological process;response to stimulus	cytoplasm;cytosol;membrane;nucleus	catalytic activity;protein binding;RNA binding;structural molecule activity	RNA degradation	TP53 regulates transcription of additional cell cycle genes whose exact role in the p53 pathway remain uncertain; Deadenylation of mRNA		1.1642 (df=5)	0.333768	0.394158	0.352591	0.994919	0.988176	0.999907	0.549332	0.820932	0.910881	0.940093	0.995737	0.999995	0.999998	0.799907	0.999962	0.860017	0.873947	-0.257018	-0.0754512	-0.0969436	-0.0509851	-0.370692	0.181567	0.160075	0.206033	-0.113674	-0.0214924	0.0244661	-0.295241	0.0459584	-0.273749	-0.319707	[-0.6324 , 0.1184]	[-0.4928 , 0.3419]	[-0.5435 , 0.3496]
A6NC98	Coiled-coil domain-containing protein 88B OS=Homo sapiens OX=9606 GN=CCDC88B PE=1 SV=1	CCDC88B	24	143	24	1		cell organization and biogenesis;defense response;metabolic process;regulation of biological process;response to stimulus;transport	cytoplasm;cytoskeleton;endoplasmic reticulum;Golgi;membrane	protein binding				0.5571 (df=5)	0.73249	0.76477	0.889704	0.927815	0.999993	0.989518	0.997922	1	0.911953	1	0.899597	0.934881	1	0.913792	0.985805	0.999571	0.96477	0.272322	0.271481	-0.0416832	0.267931	-0.189662	-0.000840866	-0.314005	-0.0043902	-0.461984	-0.313164	-0.00354933	-0.461143	0.309615	-0.147979	-0.457594	[-0.4663 , 1.0109]	[-0.5498 , 1.0927]	[-0.9204 , 0.8371]
A6NCN2	Putative keratin-87 protein OS=Homo sapiens OX=9606 GN=KRT87P PE=5 SV=4	KRT121P; KRT87P	39	3769	5	1	Methyl [K23; K24; K25; K45; K94; K151; K172; K209; K211; K228]			structural molecule activity				1.2805 (df=5)	0.280118	0.341239	0.812437	1	0.999994	0.493806	1	0.872906	0.94833	0.14881	0.974728	0.99999	0.563308	1	0.523123	0.999997	0.766382	-0.498207	0.0140224	-0.0641601	1.21009	0.0235689	0.512229	0.434047	1.7083	0.521776	-0.0781825	1.19607	0.00954649	1.27425	0.087729	-1.18652	[-1.664 , 0.6676]	[-1.2822 , 1.3102]	[-1.4511 , 1.3228]
A6ND36	Protein FAM83G OS=Homo sapiens OX=9606 GN=FAM83G PE=1 SV=2	FAM83G	3	13	3	1		regulation of biological process;response to stimulus	cytoplasm;cytosol;nucleus	protein binding				3.3814 (df=5)	0.00792936	0.018241	0.596752	1	0.493389	0.0135609	0.290239	0.739255	0.99858	0.162683	0.853981	0.615761	0.0229478	0.354604	0.351272	0.962567	0.923088	-0.676135	-0.0159612	-0.881861	-2.42944	-1.51824	0.660174	-0.205726	-1.75331	-0.842107	-0.8659	-2.41348	-1.50228	-1.54758	-0.636381	0.911201	[-1.9044 , 0.5521]	[-1.3794 , 1.3474]	[-2.3394 , 0.5757]
A6NDG6	Glycerol-3-phosphate phosphatase OS=Homo sapiens OX=9606 GN=PGP PE=1 SV=1	PGP	7	213	7	1	Met-loss+Acetyl [N-Term]	metabolic process;regulation of biological process	cytosol	catalytic activity;metal ion binding	Metabolic pathways; Glyoxylate and dicarboxylate metabolism; Carbon metabolism	Glycolysis		2.6173 (df=5)	0.0300861	0.0539623	0.98907	0.992344	0.108578	0.421305	0.158023	1	0.339434	0.666781	0.329293	0.431084	0.707384	0.377246	1	0.992105	0.998215	-0.164853	-0.169615	-0.819431	-0.854542	-1.10423	-0.00476288	-0.654578	-0.68969	-0.939379	-0.649815	-0.684927	-0.934616	-0.0351119	-0.284801	-0.249689	[-0.9375 , 0.6078]	[-1.0287 , 0.6895]	[-1.7386 , 0.0998]
A6NDU8	UPF0600 protein C5orf51 OS=Homo sapiens OX=9606 GN=C5orf51 PE=1 SV=1	C5orf51	8	74	8	1	Met-loss+Acetyl [N-Term]		cytosol					3.0556 (df=5)	0.013971	0.0289463	0.0317033	0.325287	0.998838	0.842294	0.0908826	0.980597	0.273338	0.990391	0.953486	0.738835	0.999994	0.793229	0.957173	0.236018	0.859752	-1.60488	-1.18317	-0.239258	-1.05785	-2.38774	0.421714	1.36563	0.547036	-0.782851	0.943912	0.125322	-1.20457	-0.81859	-2.14848	-1.32989	[-3.1214 , -0.0884]	[-2.8693 , 0.503]	[-2.0435 , 1.5649]
A6NE01	Protein FAM186A OS=Homo sapiens OX=9606 GN=FAM186A PE=2 SV=3	FAM186A	1	309	1	1		metabolic process;regulation of biological process						10.1454 (df=5)	1.31753e-07	2.12957e-06	1	0.991081	0.988609	0.989095	2.80237e-08	0.993322	0.99115	0.988817	4.39008e-08	1	0.929757	6.01373e-07	0.923511	1.44463e-06	2.91676e-06	-0.00654831	-0.212494	-0.239862	0.342639	-3.71699	-0.205946	-0.233314	0.349187	-3.71044	-0.0273682	0.555133	-3.5045	0.582501	-3.47713	-4.05963	[-0.943 , 0.9299]	[-1.2537 , 0.8287]	[-1.3539 , 0.8742]
A6NFN9-3	Isoform 3 of Protein ANKUB1 OS=Homo sapiens OX=9606 GN=ANKUB1		2	52	1	1								1.3242 (df=4)	0.2688	0.329104	0.837621	0.949432	0.832829	0.655173		0.485467	0.999899	0.950827		0.513374	0.407625		0.976828			-0.290443	0.220526	-0.338745	-0.630482		0.51097	-0.0483011	-0.340038		-0.559271	-0.851008		-0.291737			[-1.0737 , 0.4929]	[-0.6267 , 1.0677]	[-1.2436 , 0.5661]
A6NFQ2-3	Isoform 3 of TRPM8 channel-associated factor 2 OS=Homo sapiens OX=9606 GN=TCAF2	FAM115C; TCAF2	6	62	6	1		regulation of biological process;transport	membrane	protein binding				1.7216 (df=5)	0.138821	0.190373	0.999899	0.873177	0.999991	0.992344	0.0932904	0.949662	0.999435	0.997998	0.137326	0.888633	0.999988	0.460248	0.988775	0.119138	0.59481	-0.0628963	-0.339267	0.0462623	-0.264578	-1.22496	-0.276371	0.109159	-0.201682	-1.16207	0.385529	0.0746889	-0.885697	-0.31084	-1.27123	-0.960386	[-0.8442 , 0.7184]	[-1.2259 , 0.5474]	[-0.8832 , 0.9758]
A6NGB9	WAS/WASL-interacting protein family member 3 OS=Homo sapiens OX=9606 GN=WIPF3 PE=1 SV=4	WIPF3	3	11	3	1		cell differentiation;development;regulation of biological process;response to stimulus	cytoplasm;cytosol	protein binding	Endocytosis	Regulation of actin dynamics for phagocytic cup formation; RHO GTPases Activate WASPs and WAVEs
A6NHQ2	rRNA/tRNA 2'-O-methyltransferase fibrillarin-like protein 1 OS=Homo sapiens OX=9606 GN=FBLL1 PE=3 SV=2	FBLL1	9	800	4	1		cell organization and biogenesis;metabolic process	nucleus	catalytic activity;RNA binding				2.1252 (df=5)	0.0705276	0.10878	0.994011	0.999312	0.379349	0.949878	0.377145	0.999991	0.193659	0.84366	0.232179	0.319982	0.898737	0.312486	0.997938	0.993445	0.96186	0.131843	0.0920429	-0.553461	-0.360718	-0.799763	-0.0397996	-0.685304	-0.492561	-0.931606	-0.645504	-0.452761	-0.891806	0.192743	-0.246302	-0.439045	[-0.5725 , 0.8362]	[-0.6816 , 0.8657]	[-1.3813 , 0.2744]
A6NHR9	Structural maintenance of chromosomes flexible hinge domain-containing protein 1 OS=Homo sapiens OX=9606 GN=SMCHD1 PE=1 SV=2	SMCHD1	59	905	59	1	Met-loss+Acetyl [N-Term]	cell organization and biogenesis;regulation of biological process	chromosome	catalytic activity;nucleotide binding;protein binding				1.5611 (df=5)	0.180149	0.235709	0.998983	0.806308	0.831197	0.520528	0.681239	0.63471	0.675211	0.399376	0.55439	1	0.954235	0.988768	0.963285	0.991545	0.999963	-0.0702213	0.261122	0.268437	0.551773	0.472098	0.331343	0.338658	0.621994	0.54232	0.00731446	0.290651	0.210976	0.283336	0.203662	-0.0796747	[-0.6146 , 0.4741]	[-0.3441 , 0.8664]	[-0.3792 , 0.9161]
A6NHS7	MANSC domain-containing protein 4 OS=Homo sapiens OX=9606 GN=MANSC4 PE=3 SV=3	MANSC4	1	46	1	1			membrane					6.7109 (df=5)	2.80796e-05	0.000179263	0.712249	0.998953	0.977167	0.203062	0.000103357	0.577258	0.404349	0.692148	0.00239329	0.999311	0.154024	9.34059e-05	0.102969	5.88986e-05	0.392806	-0.465079	0.136963	0.283476	-1.27761	-2.65586	0.602043	0.748555	-0.812533	-2.19078	0.146513	-1.41458	-2.79282	-1.56109	-2.93933	-1.37824	[-1.4182 , 0.4881]	[-0.9192 , 1.1931]	[-0.8446 , 1.4115]
A6NHT5	Homeobox protein HMX3 OS=Homo sapiens OX=9606 GN=HMX3 PE=1 SV=1	HMX3	4	198	3	1		cell differentiation;development;metabolic process;regulation of biological process	nucleus	DNA binding				0.7332 (df=5)	0.600616	0.645083	0.985813	0.961364	0.964642	0.997042	0.949521	0.999912	0.768308	0.95844	0.996323	0.706409	0.929973	0.99947	0.999999	0.763192	0.902292	-0.147671	-0.206362	0.216254	0.180701	-0.339428	-0.0586917	0.363925	0.328372	-0.191757	0.422617	0.387064	-0.133065	-0.0355531	-0.555682	-0.520129	[-0.8011 , 0.5057]	[-0.9329 , 0.5202]	[-0.5611 , 0.9936]
A6NI72	Putative neutrophil cytosol factor 1B OS=Homo sapiens OX=9606 GN=NCF1B PE=5 SV=2	NCF1B	22	515	21	1		cell organization and biogenesis;metabolic process;regulation of biological process	cytoplasm	catalytic activity;enzyme regulator activity;protein binding				1.2037 (df=5)	0.314694	0.375769	0.284223	0.457686	0.973661	0.999091	0.87635	0.999999	0.916259	0.954847	0.999995	0.956136	0.971417	1	0.99999	0.994338	0.992667	0.568401	0.541493	0.241079	0.168656	0.50868	-0.0269083	-0.327322	-0.399746	-0.0597214	-0.300414	-0.372837	-0.032813	-0.0724232	0.267601	0.340024	[-0.2115 , 1.3483]	[-0.3256 , 1.4086]	[-0.6868 , 1.1689]
A6NIH7	Protein unc-119 homolog B OS=Homo sapiens OX=9606 GN=UNC119B PE=1 SV=1	UNC119B	7	71	6	1		cell differentiation;cell organization and biogenesis;transport	cytosol	protein binding		Trafficking of myristoylated proteins to the cilium		1.6744 (df=5)	0.149831	0.202691	0.999938	0.207196	0.99815	0.996323	0.65811	0.328778	0.999885	0.990191	0.745234	0.629919	0.420368	1	0.977815	0.869742	0.638209	0.0571803	0.687644	0.13653	-0.227488	0.698261	0.630463	0.0793494	-0.284669	0.64108	-0.551114	-0.915132	0.0106173	-0.364018	0.561731	0.925749	[-0.7284 , 0.8428]	[-0.1859 , 1.5612]	[-0.7981 , 1.0712]
A6NK58	Putative lipoyltransferase 2, mitochondrial OS=Homo sapiens OX=9606 GN=LIPT2 PE=1 SV=1	LIPT2	2	6	2	1		metabolic process	cytoplasm;mitochondrion;organelle lumen	catalytic activity	Metabolic pathways; Lipoic acid metabolism	Glyoxylate metabolism and glycine degradation
A6NK89	Ras association domain-containing protein 10 OS=Homo sapiens OX=9606 GN=RASSF10 PE=1 SV=3	RASSF10	2	54	1	1		regulation of biological process;response to stimulus	cytoplasm;cytoskeleton;cytosol					3.5783 (df=5)	0.00558039	0.0136828	0.208707	0.37859	0.171397	0.503462	0.00434384	0.999998	0.99757	0.998498	0.176524	0.995568	0.997315	0.183841	0.999999	0.39096	0.64232	0.916937	0.868	1.13757	1.20068	2.56973	-0.0489376	0.220631	0.283738	1.65279	0.269569	0.332676	1.70173	0.0631067	1.43216	1.36905	[-0.2497 , 2.0836]	[-0.4292 , 2.1652]	[-0.2504 , 2.5256]
A6NKG5	Retrotransposon-like protein 1 OS=Homo sapiens OX=9606 GN=RTL1 PE=3 SV=3	RTL1	8	15	8	1		development	membrane					1.1593 (df=4)	0.335866	0.396187	0.38329	0.993362	0.751689	0.644158		0.770487	0.997756	0.998698		0.949003	0.836609		0.989222			-1.07481	-0.273794	-0.841838	-1.35237		0.80102	0.232975	-0.277561		-0.568044	-1.07858		-0.510536			[-2.748 , 0.5983]	[-2.0978 , 1.5502]	[-2.8051 , 1.1214]
A6NMB1	Sialic acid-binding Ig-like lectin 16 OS=Homo sapiens OX=9606 GN=SIGLEC16 PE=2 SV=3	SIGLEC16	1	421	1	1		defense response;response to stimulus	membrane	protein binding		DAP12 interactions		6.1334 (df=5)	6.96619e-05	0.00037879	0.284866	0.999981	0.98889	0.94562	0.000777634	0.343382	0.867542	0.999425	8.64095e-06	0.980745	0.929876	0.00232485	0.998041	0.000576656	0.00210846	0.780511	-0.0682114	0.272984	0.566775	-2.67654	-0.848723	-0.507527	-0.213737	-3.45705	0.341196	0.634986	-2.60833	0.29379	-2.94952	-3.24331	[-0.2911 , 1.8521]	[-1.2597 , 1.1232]	[-1.0019 , 1.5478]
A6NMZ7	Collagen alpha-6(VI) chain OS=Homo sapiens OX=9606 GN=COL6A6 PE=1 SV=2	COL6A6	51	802	50	1	Methyl [K671; K1061; K1071; K1165; K2026]	metabolic process	extracellular		ECM-receptor interaction; Protein digestion and absorption; PI3K-Akt signaling pathway; Focal adhesion	ECM proteoglycans; Collagen degradation; Integrin cell surface interactions; Assembly of collagen fibrils and other multimeric structures; Collagen chain trimerization; NCAM1 interactions; Signaling by PDGF		2.9835 (df=5)	0.0158571	0.032153	0.656883	0.970677	0.95791	0.429818	0.298119	0.992946	0.998377	0.0836387	0.0470131	0.999998	0.225716	0.144253	0.218405	0.140751	0.999974	0.176502	0.100771	0.117351	-0.373591	-0.420049	-0.075731	-0.0591512	-0.550093	-0.596552	0.0165798	-0.474362	-0.520821	-0.490942	-0.537401	-0.0464586	[-0.1638 , 0.5168]	[-0.2776 , 0.4791]	[-0.2875 , 0.5222]
A6NNP5	Coiled-coil domain-containing protein 169 OS=Homo sapiens OX=9606 GN=CCDC169 PE=2 SV=4	CCDC169	2	19	1	1								6.116 (df=1)	0.018553	0.0364515		0.018553															1.3325															[0.2375 , 2.4275]
A6NNZ2	Tubulin beta 8B OS=Homo sapiens OX=9606 GN=TUBB8B PE=1 SV=1		41	19228	1	1	Methyl [K122; K154; K252]	cell organization and biogenesis	cytoplasm;cytoskeleton	catalytic activity;nucleotide binding;structural molecule activity		COPI-independent Golgi-to-ER retrograde traffic; COPI-dependent Golgi-to-ER retrograde traffic; Carboxyterminal post-translational modifications of tubulin; Cilium Assembly; Recruitment of NuMA to mitotic centrosomes; Translocation of GLUT4 to the plasma membrane; Microtubule-dependent trafficking of connexons from Golgi to the plasma membrane; Separation of Sister Chromatids; COPI-mediated anter…		0.2529 (df=5)	0.937169	0.944286	1	0.99999	0.999002	0.93873	1	0.999983	0.998952	0.949119	0.999999	0.999951	0.929615	1	0.881246	0.999979	0.971706	0.0102247	-0.0593776	-0.154986	0.552183	-0.0447463	-0.0696023	-0.165211	0.541958	-0.054971	-0.0956084	0.61156	0.0146313	0.707169	0.11024	-0.596929	[-1.0459 , 1.0664]	[-1.2384 , 1.1196]	[-1.3635 , 1.0535]
A6ZKI3	Retrotransposon Gag-like protein 8C OS=Homo sapiens OX=9606 GN=RTL8C PE=1 SV=1	FAM127A; RTL8C	3	76	3	1				protein binding				3.4574 (df=5)	0.00698215	0.0164054	0.766642	0.35079	0.862057	0.890393	0.00199	0.973725	1	0.999746	0.0218388	0.985937	0.999939	0.0888511	0.999831	0.0345886	0.167914	-0.432658	-0.714198	-0.436295	-0.591353	-2.41396	-0.281539	-0.00363639	-0.158695	-1.9813	0.277903	0.122845	-1.69976	-0.155058	-1.97766	-1.8226	[-1.3811 , 0.5158]	[-1.756 , 0.3276]	[-1.551 , 0.6784]
A8CG34	Nuclear envelope pore membrane protein POM 121C OS=Homo sapiens OX=9606 GN=POM121C PE=1 SV=3		11	134	10	1								9.3941 (df=5)	4.0149e-07	5.44549e-06	0.482307	1	0.420989	0.00177615	0.000384847	0.666548	0.0179269	0.0480059	0.0146569	0.503669	0.00391922	0.000972654	6.26444e-05	1.28555e-05	0.999461	-0.256877	-0.00927108	0.322437	-0.991739	-1.09778	0.247606	0.579314	-0.734861	-0.8409	0.331708	-0.982468	-1.08851	-1.31418	-1.42021	-0.106038	[-0.6772 , 0.1635]	[-0.4766 , 0.4581]	[-0.1776 , 0.8225]
A8K2U0	Alpha-2-macroglobulin-like protein 1 OS=Homo sapiens OX=9606 GN=A2ML1 PE=1 SV=3	A2ML1	37	927	36	1		regulation of biological process	extracellular	enzyme regulator activity				2.4135 (df=5)	0.042867	0.0724746	0.657477	0.999978	0.257681	0.994738	0.991771	0.674772	0.0145531	0.730561	0.999703	0.454732	0.998652	0.985555	0.943539	0.385401	0.954948	0.185309	-0.0234487	-0.317978	-0.111722	0.12302	-0.208758	-0.503287	-0.297031	-0.0622895	-0.29453	-0.0882738	0.146468	0.206256	0.440998	0.234742	[-0.1722 , 0.5428]	[-0.4209 , 0.374]	[-0.7433 , 0.1073]
A8MUX0	Keratin-associated protein 16-1 OS=Homo sapiens OX=9606 GN=KRTAP16-1 PE=3 SV=1	KRTAP16-1	2	5	2	1			cytosol			Keratinization
A8MVS5	Protein HIDE1 OS=Homo sapiens OX=9606 GN=HIDE1 PE=1 SV=2	C19orf38	1	2	1	1			membrane
A8MXV4	Nucleoside diphosphate-linked moiety X motif 19 OS=Homo sapiens OX=9606 GN=NUDT19 PE=1 SV=1	NUDT19	9	250	9	1		metabolic process	mitochondrion;organelle lumen	catalytic activity;metal ion binding;protein binding	Peroxisome	Peroxisomal lipid metabolism		4.1312 (df=5)	0.00212061	0.00623338	0.996853	0.789707	0.0577665	0.818306	0.0268548	0.960128	0.170296	0.66983	0.0623552	0.667136	0.369361	0.250662	0.0425924	0.889527	0.0139203	0.0749588	0.225662	0.535609	-0.333465	0.849599	0.150703	0.46065	-0.408424	0.774641	0.309947	-0.559127	0.623938	-0.869074	0.313991	1.18306	[-0.3841 , 0.534]	[-0.2847 , 0.736]	[-0.0105 , 1.0817]
A8TX70	Collagen alpha-5(VI) chain OS=Homo sapiens OX=9606 GN=COL6A5 PE=1 SV=1	COL6A5	23	170	22	1		metabolic process	extracellular	protein binding	ECM-receptor interaction; PI3K-Akt signaling pathway; Protein digestion and absorption; Focal adhesion	ECM proteoglycans; Collagen degradation; Integrin cell surface interactions; Assembly of collagen fibrils and other multimeric structures; Collagen chain trimerization; NCAM1 interactions; Signaling by PDGF		2.4797 (df=5)	0.038224	0.0659231	0.981348	0.834607	0.493646	0.228668	0.998524	0.993599	0.861374	0.104218	0.966002	0.992092	0.0559251	0.868966	0.022482	0.659867	0.717561	-0.16577	-0.316153	-0.496694	0.911249	0.164984	-0.150383	-0.330923	1.07702	0.330754	-0.18054	1.2274	0.481137	1.40794	0.661677	-0.746265	[-0.8558 , 0.5243]	[-1.0834 , 0.4511]	[-1.3176 , 0.3242]
A9QM74	Importin subunit alpha-8 OS=Homo sapiens OX=9606 GN=KPNA7 PE=1 SV=1	KPNA7	2	15	1	1		regulation of biological process;transport	cytoplasm;cytosol;nucleus	protein binding;transporter activity		NS1 Mediated Effects on Host Pathways; ISG15 antiviral mechanism
A9UHW6	MIF4G domain-containing protein OS=Homo sapiens OX=9606 GN=MIF4GD PE=1 SV=1	MIF4GD	3	104	2	1		regulation of biological process	cytoplasm;cytosol;nucleus	protein binding;RNA binding				5.439 (df=5)	0.000223409	0.000987508	0.792813	0.883313	0.13538	0.786469	0.015245	1	0.00993949	0.994318	0.119079	0.0241485	0.993331	0.134714	0.066746	0.000146638	0.616586	0.282278	0.266859	-0.654341	0.488766	1.26085	-0.0154192	-0.93662	0.206488	0.978575	-0.9212	0.221907	0.993995	1.14311	1.91519	0.772087	[-0.359 , 0.9236]	[-0.4462 , 0.9799]	[-1.4173 , 0.1086]
A9Z1Z3	Fer-1-like protein 4 OS=Homo sapiens OX=9606 GN=FER1L4 PE=2 SV=1	FER1L4	3	541	1	1			membrane	protein binding				0.5678 (df=4)	0.686733	0.723833	0.751395	0.96851	0.999063	0.999999		0.995227	0.734943	0.947195		0.939173	0.991582		0.999954			-0.392575	-0.24192	0.0988562	0.0265731		0.150656	0.491432	0.419148		0.340776	0.268493		-0.0722831			[-1.3065 , 0.5213]	[-1.3027 , 0.8188]	[-0.9884 , 1.1862]
B0I1T2	Unconventional myosin-Ig OS=Homo sapiens OX=9606 GN=MYO1G PE=1 SV=2	MYO1G	50	1519	46	1	Methyl [K898]; Acetyl [N-Term]	cellular component movement;regulation of biological process;response to stimulus;transport	membrane	catalytic activity;motor activity;nucleotide binding;protein binding				0.8984 (df=5)	0.486246	0.539886	0.999999	0.859324	0.997707	0.669239	0.999993	0.839272	0.999186	0.648708	0.999966	0.742541	0.980001	0.992343	0.556684	0.998393	0.90175	0.0122125	-0.171854	0.0713425	-0.344818	-0.0319162	-0.184067	0.0591301	-0.35703	-0.0441287	0.243197	-0.172964	0.139938	-0.41616	-0.103259	0.312902	[-0.3803 , 0.4047]	[-0.6083 , 0.2646]	[-0.3956 , 0.5383]
B3EWG6	Protein FAM25G OS=Homo sapiens OX=9606 GN=FAM25G PE=3 SV=1	FAM25C; FAM25A; FAM25B; FAM25BP; FAM25G	4	34	4	1								4.6023 (df=5)	0.000935899	0.00318975	0.723588	0.0858868	0.998658	0.688343	0.0230022	0.731465	0.641536	0.225835	0.186042	0.0986065	0.0347848	0.739161	0.880832	0.0219641	0.00712578	-0.389542	-0.832263	0.131415	0.695782	-1.52252	-0.442721	0.520958	1.08532	-1.13297	0.963678	1.52805	-0.690253	0.564367	-1.65393	-2.2183	[-1.1981 , 0.419]	[-1.7312 , 0.0667]	[-0.8305 , 1.0933]
B9A064	Immunoglobulin lambda-like polypeptide 5 OS=Homo sapiens OX=9606 GN=IGLL5 PE=2 SV=2	IGLL5	30	5183	8	1	Methyl [K112; K131; K151; K158; K165; K173; K188; K206]	cell organization and biogenesis;defense response;metabolic process;regulation of biological process;response to stimulus	extracellular	protein binding				2.4369 (df=5)	0.0411695	0.0700102	0.405379	0.998564	0.80629	0.999942	0.0271536	0.800167	0.999423	0.948033	0.348578	0.967389	1	0.0785565	0.989789	0.297211	0.223253	0.312557	0.0736681	0.245443	0.0590258	0.883971	-0.238889	-0.0671134	-0.253531	0.571415	0.171775	-0.0146422	0.810303	-0.186417	0.638528	0.824946	[-0.1656 , 0.7908]	[-0.458 , 0.6054]	[-0.3235 , 0.8144]
Biognosys|iRT-Kit_WR_fusion	Biognosys|iRT-Kit_WR_fusion		11	4453	11	1								6.6707 (df=5)	2.87223e-05	0.00018225	0.15699	0.999998	0.0245039	0.976905	0.108822	0.3396	3.27021e-05	0.984399	0.851613	0.0445181	0.987988	0.165841	0.0819859	0.000378783	0.705723	0.389594	0.0183542	-0.605684	0.202091	0.714242	-0.37124	-0.995279	-0.187503	0.324648	-0.624039	0.183737	0.695888	0.807775	1.31993	0.512151	[-0.0775 , 0.8567]	[-0.501 , 0.5377]	[-1.1614 , -0.0499]
C9J798	Ras GTPase-activating protein 4B OS=Homo sapiens OX=9606 GN=RASA4B PE=3 SV=2	RASA4B	10	34	9	1		regulation of biological process;response to stimulus	cytoplasm;cytosol;membrane	enzyme regulator activity;metal ion binding;protein binding				0.8087 (df=5)	0.546799	0.597125	0.762354	0.987489	0.963559	0.957363	0.939397	0.993551	0.999598	0.594492	0.999994	0.999957	0.835248	0.996652	0.779282	0.999462	0.748276	0.397244	0.208914	0.28493	-0.426468	0.464287	-0.188331	-0.112314	-0.823712	0.0670429	0.0760168	-0.635381	0.255374	-0.711398	0.179357	0.890755	[-0.4684 , 1.2628]	[-0.7419 , 1.1597]	[-0.7325 , 1.3023]
C9JLW8	Mapk-regulated corepressor-interacting protein 1 OS=Homo sapiens OX=9606 GN=MCRIP1 PE=1 SV=1	FAM195B; MCRIP1	3	61	3	1		regulation of biological process	cytoplasm;nucleus	protein binding				3.1606 (df=5)	0.0116198	0.0248796	0.999942	0.0144584	0.999984	0.995469	0.394309	0.0328607	1	0.998831	0.484628	0.087402	0.61362	0.999888	0.999032	0.55026	0.885651	-0.072735	-1.29673	-0.0667228	-0.306456	-1.14643	-1.22399	0.00601211	-0.233721	-1.0737	1.23001	0.990273	0.150299	-0.239733	-1.07971	-0.839974	[-1.0851 , 0.9397]	[-2.4224 , -0.1711]	[-1.2712 , 1.1377]
E9PRG8	Uncharacterized protein C11orf98 OS=Homo sapiens OX=9606 GN=C11orf98 PE=4 SV=2		2	69	1	1								4.8386 (df=4)	0.00160203	0.00494293	0.895449	0.00419216	0.872973	0.605942		0.0507423	0.472549	0.899828		0.00181482	0.846634		0.306389			-0.365914	-1.74546	0.469606	-0.988893		-1.37954	0.83552	-0.622979		2.21506	0.756565		-1.4585			[-1.5009 , 0.7691]	[-3.0795 , -0.4114]	[-0.9014 , 1.8406]
G9CGD6	CNK3/IPCEF1 fusion protein OS=Homo sapiens OX=9606 GN=CNK3/IPCEF1 PE=1 SV=1		3	4	2	1		regulation of biological process	cytoplasm;membrane	protein binding
I6L899	Golgin subfamily A member 8R OS=Homo sapiens OX=9606 GN=GOLGA8R PE=3 SV=1	GOLGA8R; GOLGA8N; LOC100505680; LOC101059918	2	16	2	1	Methyl [K326]		Golgi					0.9145 (df=4)	0.460212	0.514504	0.995064	0.436243	0.998496	0.999951		0.674854	0.977659	0.99997		0.466979	0.861917		0.998226			-0.146599	-0.756573	0.134505	-0.0770525		-0.609973	0.281105	0.0695469		0.891078	0.67952		-0.211558			[-1.2015 , 0.9083]	[-1.9964 , 0.4833]	[-1.1792 , 1.4483]
L0R6Q1	SLC35A4 upstream open reading frame protein OS=Homo sapiens OX=9606 GN=SLC35A4 PE=3 SV=1	SLC35A4	3	34	3	1		regulation of biological process;response to stimulus;transport	Golgi;membrane	transporter activity				1.581 (df=4)	0.187544	0.243464	0.137144	0.606178	0.553983	0.996524		0.963179	0.991102	0.851368		0.999855	0.981991		0.967042			-0.975507	-0.660032	-0.746302	-0.251822		0.315475	0.229205	0.723685		-0.0862696	0.40821		0.49448			[-2.1291 , 0.1781]	[-1.9427 , 0.6226]	[-2.1188 , 0.6262]
O00115	Deoxyribonuclease-2-alpha OS=Homo sapiens OX=9606 GN=DNASE2 PE=1 SV=2	DNASE2	7	171	7	1		cell death;cell differentiation;development;metabolic process	vacuole	catalytic activity;DNA binding	Lysosome	Lysosome Vesicle Biogenesis		3.557 (df=5)	0.00579324	0.0141005	0.992882	0.999355	0.972434	0.0178716	0.508591	0.999984	0.999753	0.00758319	0.731304	0.998584	0.0155432	0.700044	0.00851309	0.871683	0.00284617	-0.116671	-0.0783873	-0.187516	1.16122	-0.614988	0.0382841	-0.0708442	1.2779	-0.498317	-0.109128	1.23961	-0.536601	1.34874	-0.427473	-1.77621	[-0.717 , 0.4836]	[-0.7458 , 0.5891]	[-0.9017 , 0.5267]
O00116	Alkyldihydroxyacetonephosphate synthase, peroxisomal OS=Homo sapiens OX=9606 GN=AGPS PE=1 SV=1	AGPS	25	549	25	1		metabolic process	membrane;mitochondrion;organelle lumen	catalytic activity;nucleotide binding;protein binding	Peroxisome; Metabolic pathways; Ether lipid metabolism	Plasmalogen biosynthesis	Triacylglyceride Synthesis	4.269 (df=5)	0.00166809	0.00509717	0.999301	0.273991	0.965192	0.998554	0.00076499	0.48599	0.995978	0.999955	0.00188351	0.886805	0.935594	0.082433	0.999991	0.0122952	0.0445747	0.0673174	0.461319	0.185903	0.134227	1.4097	0.394001	0.118586	0.0669092	1.34238	-0.275416	-0.327092	0.948383	-0.0516767	1.2238	1.27548	[-0.4965 , 0.6311]	[-0.1655 , 1.0882]	[-0.4848 , 0.8566]
O00139-2	Isoform 2 of Kinesin-like protein KIF2A OS=Homo sapiens OX=9606 GN=KIF2A	KIF2A	24	677	20	1	Methyl [K634]	cell differentiation;cell division;cell organization and biogenesis;cellular component movement;transport	cytosol;membrane;nucleus	catalytic activity;motor activity;nucleotide binding;protein binding				1.3206 (df=5)	0.263404	0.323579	0.399882	0.926181	0.999982	0.997564	0.623527	0.977641	0.723376	0.635062	0.997786	0.984761	0.907853	0.947887	0.995081	0.760852	0.63178	0.28319	0.159375	0.0290884	-0.114478	0.396908	-0.123815	-0.254101	-0.397668	0.113718	-0.130286	-0.273853	0.237533	-0.143567	0.367819	0.511386	[-0.148 , 0.7144]	[-0.32 , 0.6388]	[-0.4839 , 0.5421]
O00142	Thymidine kinase 2, mitochondrial OS=Homo sapiens OX=9606 GN=TK2 PE=1 SV=4	TK2	7	149	6	1		metabolic process	mitochondrion;organelle lumen	catalytic activity;nucleotide binding	Metabolic pathways; Pyrimidine metabolism; Drug metabolism - other enzymes	Pyrimidine salvage		4.2434 (df=5)	0.0017441	0.00528956	0.548077	0.100779	0.999695	0.127542	0.528398	0.88543	0.88452	0.0106391	0.978749	0.374537	0.00169752	1	0.127752	0.730032	0.0192073	-0.439186	-0.764861	-0.0913229	1.13378	-0.767123	-0.325675	0.347863	1.57297	-0.327937	0.673538	1.89864	-0.00226224	1.2251	-0.6758	-1.9009	[-1.2014 , 0.323]	[-1.6123 , 0.0826]	[-0.9981 , 0.8155]
O00148	ATP-dependent RNA helicase DDX39A OS=Homo sapiens OX=9606 GN=DDX39A PE=1 SV=2	DDX39A	27	3909	7	1	Methyl [K52; K89; K130; K154; K161; K267; K397]; Met-loss+Acetyl [N-Term]	metabolic process;regulation of biological process;response to stimulus;transport	cytoplasm;membrane;nucleus;spliceosomal complex	catalytic activity;nucleotide binding;protein binding;RNA binding		Cleavage of Growing Transcript in the Termination Region ; Transport of Mature mRNA derived from an Intron-Containing Transcript; mRNA 3'-end processing		3.0174 (df=5)	0.0149406	0.0306671	0.804006	0.973144	0.99994	0.141982	0.463779	0.447046	0.81684	0.0249273	0.895017	0.997533	0.416785	0.253148	0.268042	0.463922	0.0170953	-0.186025	0.12469	0.0369695	0.626777	-0.457942	0.310715	0.222994	0.812802	-0.271917	-0.0877202	0.502087	-0.582632	0.589808	-0.494911	-1.08472	[-0.6157 , 0.2437]	[-0.3531 , 0.6024]	[-0.4742 , 0.5482]
O00151	PDZ and LIM domain protein 1 OS=Homo sapiens OX=9606 GN=PDLIM1 PE=1 SV=4	PDLIM1	26	1460	26	1	Methyl [K22; K98; K228; K256; K309]; Met-loss+Acetyl [N-Term]	regulation of biological process;response to stimulus	cytoplasm;cytoskeleton	metal ion binding;protein binding				4.976 (df=5)	0.000491845	0.001883	0.859148	0.487365	0.0189328	0.956235	0.000665906	0.979175	0.230629	0.999972	0.00756358	0.692805	0.999751	0.0419842	0.780072	0.426589	0.0978971	0.112267	0.192798	0.379975	0.143069	0.719121	0.0805317	0.267709	0.0308026	0.606854	0.187177	-0.0497291	0.526322	-0.236906	0.339145	0.576051	[-0.1727 , 0.3973]	[-0.1241 , 0.5097]	[0.0409 , 0.7191]
O00154	Cytosolic acyl coenzyme A thioester hydrolase OS=Homo sapiens OX=9606 GN=ACOT7 PE=1 SV=3	ACOT7	22	1966	2	1	Methyl [K78; K157; K168; K283; K286; K355]	metabolic process	cytoplasm;cytosol;mitochondrion	catalytic activity;protein binding	Fatty acid elongation; Biosynthesis of unsaturated fatty acids	Mitochondrial Fatty Acid Beta-Oxidation		3.1579 (df=5)	0.0116763	0.0249712	0.0613985	0.271204	0.997719	0.999991	0.0499483	0.998839	0.417337	0.671769	0.81214	0.71706	0.84095	0.69834	0.999988	0.163465	0.279702	-0.374902	-0.316268	-0.0699911	-0.0326188	-0.661505	0.0586342	0.304911	0.342283	-0.286603	0.246276	0.283649	-0.345237	0.0373723	-0.591514	-0.628886	[-0.7604 , 0.0106]	[-0.7449 , 0.1123]	[-0.5286 , 0.3886]
O00154-4	Isoform 4 of Cytosolic acyl coenzyme A thioester hydrolase OS=Homo sapiens OX=9606 GN=ACOT7	ACOT7	21	1891	1	1	Methyl [K36; K115; K126; K241; K244; K313]; Met-loss+Acetyl [N-Term]	metabolic process	cytosol;mitochondrion	catalytic activity;protein binding				3.3595 (df=5)	0.00833277	0.0190311	0.97328	0.463777	0.545864	0.606657	0.0498938	0.896892	0.921566	0.350712	0.147817	1	0.102338	0.48666	0.121424	0.508578	0.00997992	-0.205727	-0.531752	-0.528852	0.720451	-1.45519	-0.326025	-0.323125	0.926178	-1.24946	0.00289951	1.2522	-0.923435	1.2493	-0.926335	-2.17564	[-0.9958 , 0.5843]	[-1.3884 , 0.3249]	[-1.4455 , 0.3878]
O00159	Unconventional myosin-Ic OS=Homo sapiens OX=9606 GN=MYO1C PE=1 SV=4	MYO1C	71	6002	66	1	Methyl [K188; K224; K269; K361; K486; K512; K618; K927; K1005]; Met-loss+Acetyl [N-Term]	cell organization and biogenesis;regulation of biological process;response to stimulus;transport	cytoplasm;cytosol;membrane;nucleus	catalytic activity;motor activity;nucleotide binding;protein binding		Translocation of GLUT4 to the plasma membrane; Regulation of actin dynamics for phagocytic cup formation	Insulin Signaling	2.1969 (df=5)	0.0622656	0.098111	0.119911	0.804111	0.968163	0.938536	0.969322	0.915092	0.0577576	0.993498	0.981957	0.482233	0.999998	1	0.747348	0.818689	0.999998	0.358228	0.196716	-0.132001	0.222757	0.188743	-0.161512	-0.490228	-0.13547	-0.169485	-0.328717	0.0260413	-0.00797322	0.354758	0.320744	-0.0340145	[-0.0505 , 0.767]	[-0.2577 , 0.6512]	[-0.6183 , 0.3543]
O00160	Unconventional myosin-If OS=Homo sapiens OX=9606 GN=MYO1F PE=1 SV=3	MYO1F	49	1298	39	1				catalytic activity;motor activity;nucleotide binding;protein binding				3.0167 (df=5)	0.0149591	0.0306964	0.999999	0.831687	0.798354	0.996449	0.0435416	0.810372	0.852353	0.998078	0.0420494	0.261762	0.831591	0.30871	0.999123	0.00773652	0.0940577	0.0106945	-0.156843	0.176925	0.0979033	-0.594974	-0.167537	0.166231	0.0872088	-0.605669	0.333768	0.254746	-0.438132	-0.0790222	-0.7719	-0.692878	[-0.3299 , 0.3513]	[-0.5356 , 0.2219]	[-0.2283 , 0.5822]
O00161	Synaptosomal-associated protein 23 OS=Homo sapiens OX=9606 GN=SNAP23 PE=1 SV=1	SNAP23	10	388	10	1	Methyl [K40]; Acetyl [N-Term]	cell organization and biogenesis;metabolic process;transport	cytoplasm;extracellular;membrane;vacuole	catalytic activity;metal ion binding;protein binding	Platelet activation; SNARE interactions in vesicular transport	Translocation of GLUT4 to the plasma membrane; Clathrin derived vesicle budding; ER-Phagosome pathway; Neutrophil degranulation	Insulin Signaling	0.7912 (df=5)	0.559029	0.60783	0.999828	0.993122	0.968484	0.668368	0.994221	0.971243	0.99357	0.770582	0.998872	0.840496	0.492286	0.954438	0.951136	1	0.977186	0.109413	-0.261707	0.393093	1.07277	0.389019	-0.37112	0.28368	0.963355	0.279606	0.6548	1.33447	0.650726	0.679675	-0.00407413	-0.683749	[-1.1106 , 1.3295]	[-1.6182 , 1.0948]	[-1.0584 , 1.8446]
O00165	HCLS1-associated protein X-1 OS=Homo sapiens OX=9606 GN=HAX1 PE=1 SV=2	HAX1	5	35	5	1		cell organization and biogenesis;regulation of biological process;response to stimulus	cytoplasm;cytoskeleton;endoplasmic reticulum;membrane;mitochondrion;nucleus	protein binding				7.5649 (df=5)	6.78703e-06	5.55917e-05	0.839641	0.999962	0.999957	0.0296708	0.000177011	0.956462	0.969725	0.004203	0.00258678	1	0.0328103	0.000645129	0.0396665	0.00100718	8.22938e-07	-0.260933	-0.0467809	-0.05134	1.16894	-1.74643	0.214152	0.209593	1.42987	-1.4855	-0.00455913	1.21572	-1.69965	1.22028	-1.69509	-2.91537	[-0.8997 , 0.3779]	[-0.757 , 0.6635]	[-0.8113 , 0.7086]
O00168	Phospholemman OS=Homo sapiens OX=9606 GN=FXYD1 PE=1 SV=2	FXYD1	1	20	1	1		regulation of biological process;transport	membrane	protein binding;transporter activity	cAMP signaling pathway	Ion homeostasis; Ion transport by P-type ATPases		1.0853 (df=2)	0.348887	0.408378			0.965849		0.31803									0.474494				-0.16192		-1.27014									-1.10822				[-1.7395 , 1.4156]
O00170	AH receptor-interacting protein OS=Homo sapiens OX=9606 GN=AIP PE=1 SV=2	AIP	19	893	19	1	Methyl [K93]	metabolic process;regulation of biological process;response to stimulus;transport	cytoplasm;cytosol;membrane	protein binding;signal transducer activity		Gene and protein expression by JAK-STAT signaling after Interleukin-12 stimulation; Aryl hydrocarbon receptor signalling; Interleukin-12 family signaling	Aryl Hydrocarbon Receptor; Aryl Hydrocarbon Receptor Pathway	4.3443 (df=5)	0.00146352	0.00459722	0.144936	0.417365	0.906129	0.225485	0.988318	0.999503	0.0377372	0.00603148	0.967185	0.12828	0.0171696	0.993181	0.713183	0.812913	0.239675	0.366181	0.310968	-0.181814	-0.572897	0.160624	-0.0552135	-0.547995	-0.939078	-0.205557	-0.492782	-0.883864	-0.150344	-0.391083	0.342438	0.73352	[-0.0662 , 0.7986]	[-0.1698 , 0.7917]	[-0.6962 , 0.3326]
O00178	GTP-binding protein 1 OS=Homo sapiens OX=9606 GN=GTPBP1 PE=1 SV=3	GTPBP1	15	267	15	1		metabolic process;regulation of biological process;response to stimulus	cytoplasm;cytosol;membrane	catalytic activity;nucleotide binding;RNA binding				5.0109 (df=5)	0.000463273	0.00179052	0.10632	0.999985	0.979373	0.971624	0.0020613	0.286911	0.0622646	0.976295	0.163234	0.969778	0.988037	0.00548774	0.848207	0.00117192	0.147926	-0.416397	-0.0281839	0.136088	-0.211096	-1.0863	0.388213	0.552485	0.205301	-0.669906	0.164272	-0.182912	-1.05812	-0.347184	-1.22239	-0.875207	[-0.8819 , 0.0491]	[-0.5457 , 0.4893]	[-0.4177 , 0.6898]
O00182	Galectin-9 OS=Homo sapiens OX=9606 GN=LGALS9 PE=1 SV=2	LGALS9	11	641	10	1		cell differentiation;defense response;metabolic process;regulation of biological process;response to stimulus	cytoplasm;cytosol;extracellular;nucleus	protein binding;signal transducer activity		Interleukin-2 family signaling		4.6994 (df=5)	0.000791374	0.00277761	0.199357	0.674459	0.931528	0.99331	0.00560557	0.992136	0.0641233	0.419207	0.21169	0.289596	0.698789	0.116596	0.999999	0.00183201	0.019846	-0.287116	-0.204722	0.140359	0.118993	-0.779799	0.0823941	0.427475	0.406109	-0.492683	0.345081	0.323715	-0.575077	-0.0213657	-0.920158	-0.898792	[-0.6487 , 0.0745]	[-0.6068 , 0.1974]	[-0.2899 , 0.5706]
O00186	Syntaxin-binding protein 3 OS=Homo sapiens OX=9606 GN=STXBP3 PE=1 SV=2	STXBP3	18	569	18	1	Methyl [K397]	cell organization and biogenesis;regulation of biological process;response to stimulus;transport	cytoplasm;cytosol;membrane	protein binding		Translocation of GLUT4 to the plasma membrane; Disinhibition of SNARE formation	Insulin Signaling	1.2148 (df=5)	0.309503	0.37087	0.959961	0.638773	0.907468	0.962357	0.999861	0.972513	0.546923	0.999446	0.999901	0.234887	0.999982	0.980079	0.714282	0.947761	0.997813	-0.343712	-0.704924	0.502667	-0.581218	-0.176652	-0.361213	0.846379	-0.237506	0.16706	1.20759	0.123707	0.528272	-1.08389	-0.67932	0.404566	[-1.5436 , 0.8562]	[-2.0391 , 0.6292]	[-0.9249 , 1.9302]
O00193	Small acidic protein OS=Homo sapiens OX=9606 GN=SMAP PE=1 SV=1	C11orf58	5	188	5	1								4.4962 (df=5)	0.00112449	0.00370446	0.970861	0.807933	0.194404	0.668411	0.0387311	0.413741	0.0522774	0.906901	0.0121033	0.901267	0.251813	0.302183	0.0554815	0.787284	0.0103596	-0.210175	0.37815	0.750568	-0.694867	1.40086	0.588325	0.960743	-0.484692	1.61103	0.372418	-1.07302	1.02271	-1.44543	0.650291	2.09573	[-1.0005 , 0.5801]	[-0.5006 , 1.2569]	[-0.1897 , 1.6908]
O00194	Ras-related protein Rab-27B OS=Homo sapiens OX=9606 GN=RAB27B PE=1 SV=4	RAB27B	9	329	6	1		regulation of biological process;response to stimulus;transport	Golgi;membrane	catalytic activity;nucleotide binding;protein binding	Pancreatic secretion	Platelet degranulation ; RAB GEFs exchange GTP for GDP on RABs; RAB geranylgeranylation	Deregulation of Rab and Rab Effector Genes in Bladder Cancer	0.8092 (df=5)	0.54638	0.596847	0.999927	0.998296	0.750062	0.994492	0.936657	0.990946	0.861332	0.98616	0.967656	0.611212	0.999857	0.860955	0.745042	1	0.866775	-0.0642556	0.136304	-0.473725	0.269425	-0.468752	0.20056	-0.40947	0.333681	-0.404496	-0.61003	0.133121	-0.605056	0.743151	0.00497388	-0.738177	[-0.918 , 0.7895]	[-0.8129 , 1.0855]	[-1.4894 , 0.542]
O00203	AP-3 complex subunit beta-1 OS=Homo sapiens OX=9606 GN=AP3B1 PE=1 SV=3	AP3B1	42	1928	32	1	Methyl [K542; K629]	cell organization and biogenesis;cellular component movement;coagulation;regulation of biological process;transport	Golgi;membrane	protein binding	Lysosome	Signaling by BRAF and RAF fusions; Golgi Associated Vesicle Biogenesis		3.3998 (df=5)	0.00763468	0.0176746	0.434012	0.747187	0.99999	0.0117398	0.327946	0.999676	0.558982	0.199931	0.933321	0.791192	0.161919	0.880165	0.0190092	0.360268	0.892507	-0.160111	-0.130719	0.0150991	-0.506648	-0.301658	0.0293916	0.17521	-0.346537	-0.141547	0.145818	-0.375929	-0.170939	-0.521747	-0.316757	0.20499	[-0.4113 , 0.091]	[-0.41 , 0.1485]	[-0.2837 , 0.3139]
O00204	Sulfotransferase 2B1 OS=Homo sapiens OX=9606 GN=SULT2B1 PE=1 SV=2	SULT2B1	12	211	12	1		metabolic process;regulation of biological process	cytoplasm;cytosol;endoplasmic reticulum;nucleus	catalytic activity;protein binding	Steroid hormone biosynthesis	Cytosolic sulfonation of small molecules	Sulfation Biotransformation Reaction; Metapathway biotransformation; Vitamin A and Carotenoid Metabolism	6.8952 (df=5)	1.99193e-05	0.000136224	0.999096	0.999927	1	0.332512	4.88985e-05	0.999998	0.999448	0.474269	2.75265e-05	0.999934	0.473239	7.58735e-05	0.408048	0.000222439	9.07925e-06	0.0662668	0.0441444	-0.00695637	0.629656	-1.54222	-0.0221225	-0.0732232	0.563389	-1.60848	-0.0511007	0.585512	-1.58636	0.636612	-1.53526	-2.17187	[-0.4601 , 0.5927]	[-0.5412 , 0.6294]	[-0.6332 , 0.6193]
O00214	Galectin-8 OS=Homo sapiens OX=9606 GN=LGALS8 PE=1 SV=4	LGALS8	8	272	5	1		metabolic process;response to stimulus	cytoplasm;cytosol;membrane	protein binding				2.7382 (df=5)	0.0244482	0.0454519	0.572191	0.943153	0.999219	0.997933	0.00828328	0.995085	0.917361	0.995446	0.121364	0.997466	0.999987	0.0718379	0.999976	0.0351246	0.170838	-0.580061	-0.363982	-0.149548	-0.26398	-2.14581	0.216079	0.430513	0.316082	-1.56575	0.214434	0.100003	-1.78183	-0.114432	-1.99627	-1.88183	[-1.6096 , 0.4495]	[-1.5325 , 0.8045]	[-1.3744 , 1.0753]
O00217	NADH dehydrogenase [ubiquinone] iron-sulfur protein 8, mitochondrial OS=Homo sapiens OX=9606 GN=NDUFS8 PE=1 SV=1	NDUFS8	9	351	9	1		cell organization and biogenesis;metabolic process;response to stimulus;transport	membrane;mitochondrion;organelle lumen	catalytic activity;metal ion binding	Alzheimer's disease; Metabolic pathways; Huntington's disease; Oxidative phosphorylation; Parkinson's disease; Non-alcoholic fatty liver disease (NAFLD)	Complex I biogenesis	Electron Transport Chain; Oxidative phosphorylation	3.2417 (df=5)	0.0100773	0.0221688	0.233766	0.995808	0.977634	0.999997	0.113796	0.692573	0.873352	0.729202	0.00328065	0.999904	0.998289	0.0737864	0.992519	0.0586273	0.41007	-0.447948	-0.112877	-0.174219	0.0389365	0.887776	0.335071	0.273729	0.486884	1.33572	-0.0613416	0.151813	1.00065	0.213155	1.06199	0.84884	[-1.033 , 0.1371]	[-0.7634 , 0.5376]	[-0.8702 , 0.5218]
O00221	NF-kappa-B inhibitor epsilon OS=Homo sapiens OX=9606 GN=NFKBIE PE=1 SV=3	NFKBIE	3	32	3	1		regulation of biological process;transport	cytoplasm;cytosol;Golgi;nucleus	protein binding	B cell receptor signaling pathway; T cell receptor signaling pathway; Neurotrophin signaling pathway; Th1 and Th2 cell differentiation; Adipocytokine signaling pathway; Epstein-Barr virus infection	Activation of NF-kappaB in B cells	TNF alpha Signaling Pathway; Apoptosis; Oxidative Damage	1.2126 (df=5)	0.310503	0.371677	0.89227	0.969183	0.663031	0.932736	0.692673	0.99998	0.991542	0.633527	0.962641	0.982015	0.736178	0.945502	0.445585	0.998896	0.439823	-0.309104	-0.252711	-0.517241	0.470147	-0.722526	0.056393	-0.208136	0.779251	-0.413421	-0.264529	0.722858	-0.469814	0.987387	-0.205285	-1.19267	[-1.1527 , 0.5345]	[-1.1907 , 0.6853]	[-1.5209 , 0.4864]
O00231	26S proteasome non-ATPase regulatory subunit 11 OS=Homo sapiens OX=9606 GN=PSMD11 PE=1 SV=3	PSMD11	28	2646	28	1	Methyl [K32; K59; K71; K141; K355]; Met-loss+Acetyl [N-Term]	cell differentiation;cell organization and biogenesis;metabolic process;regulation of biological process;response to stimulus;transport	cytoplasm;cytosol;extracellular;membrane;nucleus;organelle lumen;proteasome	catalytic activity;protein binding;structural molecule activity	Proteasome; Epstein-Barr virus infection	Regulation of RAS by GAPs; CDT1 association with the CDC6:ORC:origin complex; Downstream TCR signaling; UCH proteinases; NIK-->noncanonical NF-kB signaling; Hh mutants that don't undergo autocatalytic processing are degraded by ERAD; SCF-beta-TrCP mediated degradation of Emi1; Neutrophil degranulation; Cross-presentation of soluble exogenous antigens (endosomes); Separation of Sister Chromatids; …	Proteasome Degradation; Parkin-Ubiquitin Proteasomal System pathway	5.8095 (df=5)	0.00011964	0.000594288	0.271329	0.00506538	0.990296	0.99326	0.00526094	0.530834	0.186275	0.983171	0.168519	0.00549248	0.50687	0.823075	0.943561	0.00363444	0.1661	-0.255086	-0.487246	0.0855049	-0.113943	-0.749523	-0.23216	0.340591	0.141143	-0.494436	0.572751	0.373303	-0.262276	-0.199448	-0.835027	-0.635579	[-0.6008 , 0.0906]	[-0.8717 , -0.1028]	[-0.3258 , 0.4968]
O00232	26S proteasome non-ATPase regulatory subunit 12 OS=Homo sapiens OX=9606 GN=PSMD12 PE=1 SV=3	PSMD12	33	1281	33	1	Methyl [K52; K197; K419]	metabolic process;regulation of biological process;response to stimulus;transport	cytoplasm;cytosol;extracellular;membrane;organelle lumen;proteasome	catalytic activity;protein binding	Proteasome; Epstein-Barr virus infection	Regulation of RAS by GAPs; CDT1 association with the CDC6:ORC:origin complex; Downstream TCR signaling; UCH proteinases; NIK-->noncanonical NF-kB signaling; Hh mutants that don't undergo autocatalytic processing are degraded by ERAD; SCF-beta-TrCP mediated degradation of Emi1; Neutrophil degranulation; Cross-presentation of soluble exogenous antigens (endosomes); Separation of Sister Chromatids; …	Proteasome Degradation; Parkin-Ubiquitin Proteasomal System pathway	1.678 (df=5)	0.148958	0.201663	0.983199	0.978707	0.711767	0.652532	0.932802	0.999998	0.38198	0.87757	0.76849	0.410354	0.916777	0.759152	0.19769	1	0.40991	0.112864	0.132365	-0.279504	0.429938	-0.267958	0.0195011	-0.392368	0.317074	-0.380822	-0.411869	0.297573	-0.400323	0.709442	0.0115465	-0.697896	[-0.3681 , 0.5938]	[-0.4024 , 0.6671]	[-0.8517 , 0.2927]
O00233	26S proteasome non-ATPase regulatory subunit 9 OS=Homo sapiens OX=9606 GN=PSMD9 PE=1 SV=3	PSMD9	10	760	10	1		cell organization and biogenesis;metabolic process;regulation of biological process;response to stimulus;transport	cytoplasm;cytosol;nucleus	protein binding		Regulation of RAS by GAPs; CDT1 association with the CDC6:ORC:origin complex; Downstream TCR signaling; UCH proteinases; NIK-->noncanonical NF-kB signaling; Hh mutants that don't undergo autocatalytic processing are degraded by ERAD; SCF-beta-TrCP mediated degradation of Emi1; Cross-presentation of soluble exogenous antigens (endosomes); Separation of Sister Chromatids; Vpu mediated degradation o…	Proteasome Degradation; Parkin-Ubiquitin Proteasomal System pathway	10.5616 (df=5)	7.1884e-08	1.267e-06	0.015815	0.960069	0.991076	6.83473e-05	0.46228	0.300734	0.275316	2.84071e-08	0.00493967	0.999981	2.34109e-05	0.231677	6.42808e-05	0.317995	0.178191	-0.307491	-0.0857284	-0.0654055	0.775554	0.287429	0.221763	0.242085	1.08305	0.59492	0.0203229	0.861283	0.373157	0.84096	0.352834	-0.488125	[-0.5768 , -0.0381]	[-0.3852 , 0.2137]	[-0.3858 , 0.255]
O00241	Signal-regulatory protein beta-1 OS=Homo sapiens OX=9606 GN=SIRPB1 PE=1 SV=5	SIRPB1	5	184	2	1		defense response;regulation of biological process;response to stimulus;transport	membrane	protein binding		Neutrophil degranulation; DAP12 interactions; Signal regulatory protein family interactions
O00244	Copper transport protein ATOX1 OS=Homo sapiens OX=9606 GN=ATOX1 PE=1 SV=1	ATOX1	4	212	4	1	Methyl [K30]	cellular homeostasis;response to stimulus;transport	cytosol	metal ion binding;protein binding;transporter activity	Mineral absorption	Ion influx/efflux at host-pathogen interface; Detoxification of Reactive Oxygen Species	Copper homeostasis	7.4275 (df=5)	8.44849e-06	6.67916e-05	0.717654	0.988215	0.99831	0.999697	1.82505e-06	0.989234	0.624057	0.995058	6.86127e-05	0.942202	0.999998	2.95518e-05	0.994334	3.6408e-06	0.000831985	-0.368696	-0.183287	0.129594	-0.1312	-2.58598	0.185408	0.49829	0.237496	-2.21729	0.312882	0.0520879	-2.4027	-0.260794	-2.71558	-2.45478	[-1.1286 , 0.3912]	[-1.0282 , 0.6617]	[-0.7745 , 1.0337]
O00255	Menin OS=Homo sapiens OX=9606 GN=MEN1 PE=1 SV=4	MEN1	5	42	5	1		cell differentiation;cell organization and biogenesis;cellular homeostasis;metabolic process;regulation of biological process;response to stimulus	chromosome;cytoplasm;cytosol;nucleus;organelle lumen	catalytic activity;DNA binding;protein binding	Transcriptional misregulation in cancer	Post-translational protein phosphorylation; Regulation of Insulin-like Growth Factor (IGF) transport and uptake by Insulin-like Growth Factor Binding Proteins (IGFBPs); SMAD2/SMAD3:SMAD4 heterotrimer regulates transcription; Deactivation of the beta-catenin transactivating complex; Formation of the beta-catenin:TCF transactivating complex; RHO GTPases activate IQGAPs	Cell Cycle	4.0663 (df=5)	0.00237494	0.00682818	0.721231	0.348154	0.532026	1	0.19825	0.979618	0.0654229	0.968054	0.0307291	0.0208142	0.827071	0.0114339	0.875508	0.898853	0.471928	1.01056	1.59871	-1.45493	0.0223795	-2.85286	0.588152	-2.46548	-0.988177	-3.86341	-3.05364	-1.57633	-4.45156	1.47731	-1.39793	-2.87524	[-1.0811 , 3.1022]	[-0.727 , 3.9244]	[-3.9434 , 1.0335]
O00257	E3 SUMO-protein ligase CBX4 OS=Homo sapiens OX=9606 GN=CBX4 PE=1 SV=3	CBX4	2	49	2	1		cell organization and biogenesis;metabolic process;regulation of biological process	nucleus	catalytic activity;DNA binding;protein binding;RNA binding		RUNX1 interacts with co-factors whose precise effect on RUNX1 targets is not known; SUMOylation of chromatin organization proteins; Regulation of PTEN gene transcription; SUMOylation of DNA damage response and repair proteins; Oxidative Stress Induced Senescence; SUMOylation of RNA binding proteins		1.3916 (df=4)	0.244741	0.303875	0.763294	0.292824	0.924278	0.434827		0.887438	0.999817	0.850991		0.870698	0.996548		0.828224			-0.372324	-0.720291	-0.307387	-0.925834		-0.347966	0.0649371	-0.55351		0.412903	-0.205544		-0.618447			[-1.2545 , 0.5099]	[-1.7442 , 0.3036]	[-1.3569 , 0.7422]
O00264	Membrane-associated progesterone receptor component 1 OS=Homo sapiens OX=9606 GN=PGRMC1 PE=1 SV=3	PGRMC1	15	1080	12	1	Methyl [K172; K187]	transport	endoplasmic reticulum;membrane	protein binding		Neutrophil degranulation		5.1719 (df=5)	0.000351846	0.00142275	0.88273	0.987635	0.0931481	0.999863	0.0180316	0.999437	0.00981591	0.951441	0.105427	0.0457507	0.988365	0.080315	0.678015	0.000119796	0.0816824	0.141941	0.0923232	-0.411881	-0.0556091	0.731984	-0.0496181	-0.553822	-0.19755	0.590043	-0.504204	-0.147932	0.639661	0.356272	1.14387	0.787593	[-0.2368 , 0.5207]	[-0.3288 , 0.5134]	[-0.8625 , 0.0387]
O00267	Transcription elongation factor SPT5 OS=Homo sapiens OX=9606 GN=SUPT5H PE=1 SV=1	SUPT5H	32	532	32	1		cell organization and biogenesis;development;metabolic process;regulation of biological process;response to stimulus	nucleus	DNA binding;protein binding;RNA binding		RNA polymerase II transcribes snRNA genes; Abortive elongation of HIV-1 transcript in the absence of Tat; Tat-mediated HIV elongation arrest and recovery; Pausing and recovery of HIV elongation; Formation of HIV-1 elongation complex containing HIV-1 Tat; HIV elongation arrest and recovery; RNA Pol II CTD phosphorylation and interaction with CE; Formation of the HIV-1 Early Elongation Complex; TP5…	Initiation of transcription and translation elongation at the HIV-1 LTR; mRNA Processing	1.0358 (df=5)	0.40219	0.460938	0.999999	0.424508	0.999963	0.999963	0.994486	0.408835	0.999817	0.999876	0.996917	0.720111	0.925375	0.558657	1	0.98931	0.993233	-0.0195536	0.424577	0.0464013	0.0670258	-0.187522	0.444131	0.0659549	0.0865794	-0.167969	-0.378176	-0.357551	-0.612099	0.0206245	-0.233924	-0.254548	[-0.6136 , 0.5745]	[-0.2359 , 1.0851]	[-0.6603 , 0.7532]
O00268	Transcription initiation factor TFIID subunit 4 OS=Homo sapiens OX=9606 GN=TAF4 PE=1 SV=2	TAF4	5	22	5	1		cell organization and biogenesis;metabolic process;regulation of biological process	cytosol;nucleus	DNA binding;protein binding	Basal transcription factors; Huntington's disease; Herpes simplex infection	RNA Polymerase II Transcription Initiation; HIV Transcription Initiation; RNA Polymerase II Transcription Pre-Initiation And Promoter Opening; RNA Polymerase II HIV Promoter Escape; Regulation of TP53 Activity through Phosphorylation; RNA Polymerase II Pre-transcription Events; RNA Polymerase II Promoter Escape		4.135 (df=5)	0.00218172	0.00637567	0.963567	0.00493929	0.472563	1	0.0504232	0.0625711	0.898543	0.996952	0.175424	0.65039	0.276322	0.996795	0.879705	0.635676	0.272475	0.314418	1.54744	0.801348	-0.0240507	1.86869	1.23302	0.48693	-0.338469	1.55427	-0.74609	-1.57149	0.321252	-0.825399	1.06734	1.89274	[-0.8096 , 1.4384]	[0.3302 , 2.7647]	[-0.5 , 2.1027]
O00273	DNA fragmentation factor subunit alpha OS=Homo sapiens OX=9606 GN=DFFA PE=1 SV=1	DFFA	15	400	15	1	Acetyl [N-Term]	cell death;metabolic process;regulation of biological process	cytoplasm;cytosol;membrane;nucleus	enzyme regulator activity;protein binding	Apoptosis	Activation of DNA fragmentation factor	Apoptosis; Fas Ligand (FasL) pathway and Stress induction of Heat Shock Proteins (HSP) regulation	1.0721 (df=5)	0.38184	0.440937	0.811009	0.947537	0.868047	0.975597	0.27121	0.999918	1	1	0.723615	0.999809	0.999985	0.667335	1	0.80162	0.886523	0.187235	0.148533	0.201224	0.191513	0.553477	-0.0387016	0.0139886	0.00427834	0.366242	0.0526903	0.04298	0.404944	-0.00971029	0.352253	0.361964	[-0.2499 , 0.6244]	[-0.3375 , 0.6346]	[-0.3189 , 0.7213]
O00291	Huntingtin-interacting protein 1 OS=Homo sapiens OX=9606 GN=HIP1 PE=1 SV=5	HIP1	27	418	24	1		cell death;cell differentiation;cell organization and biogenesis;cellular component movement;metabolic process;regulation of biological process;response to stimulus;transport	cytoplasm;cytoskeleton;cytosol;Golgi;membrane;nucleus	catalytic activity;motor activity;protein binding;structural molecule activity	Huntington's disease	Clathrin-mediated endocytosis		4.9197 (df=5)	0.00054173	0.00203239	0.37513	0.945306	0.997528	0.0213583	0.00807444	0.960309	0.328166	0.319109	0.176047	0.849608	0.132321	0.0641146	0.0185322	0.00747002	0.999864	-0.19318	-0.0987873	0.0531482	-0.546363	-0.601155	0.094393	0.246329	-0.353182	-0.407974	0.151936	-0.447576	-0.502367	-0.599511	-0.654303	-0.0547919	[-0.481 , 0.0946]	[-0.4188 , 0.2212]	[-0.2893 , 0.3956]
O00299	Chloride intracellular channel protein 1 OS=Homo sapiens OX=9606 GN=CLIC1 PE=1 SV=4	CLIC1	28	3603	26	1	Methyl [K13; K49; K79; K113; K131; K138; K166; K183; K192; K193; K238]; Met-loss+Acetyl [N-Term]	metabolic process;regulation of biological process;response to stimulus;transport	cytoplasm;membrane;mitochondrion;nucleus	catalytic activity;protein binding;transporter activity				2.0543 (df=5)	0.0794148	0.120351	0.856514	0.473193	0.714161	0.0569173	1	0.976994	0.997889	0.265439	0.989817	0.999901	0.589288	0.896675	0.509205	0.954046	0.264325	-0.1505	-0.260359	-0.220296	-0.64097	-0.0116366	-0.10986	-0.0697964	-0.490471	0.138863	0.0400631	-0.380611	0.248722	-0.420674	0.208659	0.629333	[-0.5306 , 0.2296]	[-0.683 , 0.1623]	[-0.6725 , 0.2319]
O00303	Eukaryotic translation initiation factor 3 subunit F OS=Homo sapiens OX=9606 GN=EIF3F PE=1 SV=1	EIF3F	16	1159	16	1	Methyl [K126; K254; K297]	metabolic process	cytoplasm;cytosol;membrane	catalytic activity;protein binding;RNA binding	RNA transport	Formation of the ternary complex, and subsequently, the 43S complex; L13a-mediated translational silencing of Ceruloplasmin expression; Translation initiation complex formation; GTP hydrolysis and joining of the 60S ribosomal subunit; Formation of a pool of free 40S subunits; Ribosomal scanning and start codon recognition	Translation Factors	4.3851 (df=5)	0.00136349	0.00434093	0.121015	0.0581088	0.993912	0.0727406	0.212499	0.994044	0.103641	0.803264	0.96931	0.0507921	0.952353	0.998471	0.0504646	0.146863	0.999015	-0.460724	-0.573708	0.117712	-0.857559	-0.707161	-0.112984	0.578436	-0.396835	-0.246437	0.69142	-0.283851	-0.133453	-0.975272	-0.824874	0.150398	[-0.9872 , 0.0658]	[-1.1591 , 0.0117]	[-0.5087 , 0.7441]
O00308	NEDD4-like E3 ubiquitin-protein ligase WWP2 OS=Homo sapiens OX=9606 GN=WWP2 PE=1 SV=2	WWP2	4	257	1	1		metabolic process;regulation of biological process;transport	cytoplasm;cytosol;membrane;nucleus	catalytic activity;protein binding	Ubiquitin mediated proteolysis	Regulation of PTEN stability and activity
O00329	Phosphatidylinositol 4,5-bisphosphate 3-kinase catalytic subunit delta isoform OS=Homo sapiens OX=9606 GN=PIK3CD PE=1 SV=2	PIK3CD	22	321	21	1		cell differentiation;cellular component movement;defense response;metabolic process;regulation of biological process;response to stimulus;transport	cytoplasm;cytosol;membrane;vacuole	catalytic activity;nucleotide binding;protein binding	Phospholipase D signaling pathway; Natural killer cell mediated cytotoxicity; Focal adhesion; Fc epsilon RI signaling pathway; PI3K-Akt signaling pathway; HIF-1 signaling pathway; Oxytocin signaling pathway; Melanoma; Sphingolipid signaling pathway; Estrogen signaling pathway; Acute myeloid leukemia; Adrenergic signaling in cardiomyocytes; Carbohydrate digestion and absorption; Axon guidance; TNF…	PI5P, PP2A and IER3 Regulate PI3K/AKT Signaling; G beta:gamma signalling through PI3Kgamma; Interleukin receptor SHC signaling; GPVI-mediated activation cascade; Regulation of signaling by CBL; RET signaling; Synthesis of PIPs at the plasma membrane; Constitutive Signaling by Aberrant PI3K in Cancer; Antigen activates B Cell Receptor (BCR) leading to generation of second messengers	AMP-activated Protein Kinase (AMPK) Signaling; Regulation of toll-like receptor signaling pathway; MicroRNAs in cardiomyocyte hypertrophy; Signaling Pathways in Glioblastoma; IL-3 Signaling Pathway; Focal Adhesion; Overview of nanoparticle effects; Angiopoietin Like Protein 8 Regulatory Pathway; Chemokine signaling pathway; ESC Pluripotency Pathways; Focal Adhesion-PI3K-Akt-mTOR-signaling pathway…	1.6868 (df=5)	0.146819	0.19926	0.991904	0.999922	0.998818	1	0.0797511	0.978469	0.999999	0.998984	0.182628	0.99437	0.999999	0.079512	0.999726	0.214742	0.27999	0.111786	-0.0474656	0.0885583	-0.0136544	0.898657	-0.159252	-0.0232278	-0.125441	0.786871	0.136024	0.0338112	0.946123	-0.102213	0.810099	0.912312	[-0.4476 , 0.6712]	[-0.6694 , 0.5745]	[-0.5769 , 0.754]
O00330	Pyruvate dehydrogenase protein X component, mitochondrial OS=Homo sapiens OX=9606 GN=PDHX PE=1 SV=3	PDHX	14	475	14	1		metabolic process;regulation of biological process	mitochondrion;organelle lumen	catalytic activity;protein binding	Metabolic pathways	Regulation of pyruvate dehydrogenase (PDH) complex; Signaling by Retinoic Acid; Glyoxylate metabolism and glycine degradation	Amino Acid metabolism; Glycolysis and Gluconeogenesis	1.3809 (df=5)	0.239864	0.298684	0.907218	0.994553	0.722697	0.984995	0.933866	0.718007	0.244574	0.810844	0.99938	0.963095	0.999636	0.822784	0.999738	0.486951	0.815742	0.211749	-0.122602	-0.344806	-0.235941	0.333485	-0.334351	-0.556555	-0.44769	0.121736	-0.222204	-0.113339	0.456087	0.108865	0.678291	0.569426	[-0.3892 , 0.8127]	[-0.7908 , 0.5456]	[-1.0597 , 0.3701]
O00338	Sulfotransferase 1C2 OS=Homo sapiens OX=9606 GN=SULT1C2 PE=1 SV=1	SULT1C2	3	16	2	1		metabolic process	cytoplasm;cytosol	catalytic activity;protein binding		Cytosolic sulfonation of small molecules	Sulfation Biotransformation Reaction; Metapathway biotransformation	0.9749 (df=3)	0.411571	0.469622		0.662583	0.973679	0.447333						0.935324	0.90713		0.695694				-0.391112	-0.15317	-0.751437						0.237942	-0.360325		-0.598267				[-1.2958 , 0.5136]	[-1.1056 , 0.7993]
O00339	Matrilin-2 OS=Homo sapiens OX=9606 GN=MATN2 PE=1 SV=4	MATN2	20	362	19	1		cell organization and biogenesis;cellular component movement;response to stimulus	extracellular	metal ion binding;protein binding				0.8075 (df=5)	0.5476	0.597643	0.999136	1	0.97541	0.781199	0.868712	0.999109	0.908772	0.666867	0.772391	0.988295	0.831075	0.90297	0.977774	0.993044	0.999993	0.066466	-0.0102675	-0.162147	-0.409155	-0.353263	-0.0767336	-0.228613	-0.475621	-0.419729	-0.15188	-0.398888	-0.342995	-0.247008	-0.191116	0.0558925	[-0.4664 , 0.5993]	[-0.6028 , 0.5822]	[-0.7961 , 0.4718]
O00391	Sulfhydryl oxidase 1 OS=Homo sapiens OX=9606 GN=QSOX1 PE=1 SV=3	QSOX1	16	225	16	1		cellular homeostasis;metabolic process;regulation of biological process;transport	extracellular;Golgi;membrane;organelle lumen	catalytic activity		Platelet degranulation ; Post-translational protein phosphorylation; Regulation of Insulin-like Growth Factor (IGF) transport and uptake by Insulin-like Growth Factor Binding Proteins (IGFBPs); Neutrophil degranulation		0.821 (df=5)	0.538171	0.588849	0.979058	0.856433	0.999345	0.999677	0.818053	0.996316	0.999851	0.999996	0.579428	0.985215	0.998093	0.418198	1	0.748285	0.845061	0.144136	0.25735	0.0819259	0.102214	-0.424789	0.113214	-0.0622105	-0.0419223	-0.568926	-0.175424	-0.155136	-0.68214	0.0202882	-0.506715	-0.527003	[-0.4404 , 0.7286]	[-0.3925 , 0.9072]	[-0.6135 , 0.7773]
O00399	Dynactin subunit 6 OS=Homo sapiens OX=9606 GN=DCTN6 PE=1 SV=1	DCTN6	4	93	4	1		transport	chromosome;cytoplasm;cytoskeleton;cytosol		Vasopressin-regulated water reabsorption	COPI-independent Golgi-to-ER retrograde traffic; COPI-mediated anterograde transport; MHC class II antigen presentation; HSP90 chaperone cycle for steroid hormone receptors (SHR)		4.8028 (df=5)	0.000662279	0.0024043	0.668414	0.202431	0.98203	0.0290532	0.99825	0.936488	0.410291	0.00229181	0.797543	0.114113	0.000471402	0.457688	0.154824	1	0.309564	-0.311612	-0.535012	0.172355	1.11546	0.150643	-0.223399	0.483967	1.42708	0.462255	0.707367	1.65047	0.685655	0.943108	-0.0217121	-0.96482	[-0.9197 , 0.2965]	[-1.2111 , 0.1411]	[-0.5511 , 0.8958]
O00400	Acetyl-coenzyme A transporter 1 OS=Homo sapiens OX=9606 GN=SLC33A1 PE=1 SV=1	SLC33A1	7	139	7	1		regulation of biological process;response to stimulus;transport	endoplasmic reticulum;membrane	transporter activity	Metabolic pathways; Glycosphingolipid biosynthesis - ganglio series	Transport of vitamins, nucleosides, and related molecules; Defective SLC33A1 causes spastic paraplegia 42 (SPG42)	Ganglio Sphingolipid Metabolism	4.2696 (df=5)	0.00166633	0.00509394	0.99746	0.877069	0.945305	0.997504	0.00302171	0.984109	0.995903	0.980302	0.00147459	0.999996	0.874706	0.000545884	0.917498	0.00111953	0.104282	0.16782	0.453708	0.394851	-0.286892	-2.43759	0.285887	0.227031	-0.454712	-2.60541	-0.0588568	-0.7406	-2.8913	-0.681743	-2.83244	-2.1507	[-0.9073 , 1.243]	[-0.7417 , 1.6491]	[-0.8843 , 1.674]
O00401	Neural Wiskott-Aldrich syndrome protein OS=Homo sapiens OX=9606 GN=WASL PE=1 SV=2	WASL; ASB15	12	344	12	1	Met-loss+Acetyl [N-Term]	cell division;cell organization and biogenesis;cellular component movement;metabolic process;regulation of biological process;response to stimulus;transport	cytoplasm;cytoskeleton;cytosol;membrane;nucleus	catalytic activity;enzyme regulator activity;protein binding	Salmonella infection; Regulation of actin cytoskeleton; Pathogenic Escherichia coli infection; Chemokine signaling pathway; Bacterial invasion of epithelial cells; Adherens junction; Choline metabolism in cancer; Shigellosis; Endocytosis; Fc gamma R-mediated phagocytosis	Nephrin family interactions; DCC mediated attractive signaling; EPHB-mediated forward signaling; Clathrin-mediated endocytosis; RHO GTPases Activate WASPs and WAVEs; NOSTRIN mediated eNOS trafficking; Regulation of actin dynamics for phagocytic cup formation	Pathogenic Escherichia coli infection; Factors and pathways affecting insulin-like growth factor (IGF1)-Akt signaling; Chemokine signaling pathway; G13 Signaling Pathway	4.1023 (df=5)	0.00223027	0.0064812	0.383222	0.218568	1	0.844128	0.386459	0.00265387	0.556719	1	0.967658	0.443279	0.129996	0.0206389	0.860971	0.443181	0.991944	-0.304054	0.394554	0.0148941	-0.317208	-0.520218	0.698608	0.318948	-0.0131544	-0.216164	-0.37966	-0.711763	-0.914772	-0.332102	-0.535112	-0.20301	[-0.7603 , 0.1522]	[-0.1127 , 0.9018]	[-0.5279 , 0.5577]
O00408	cGMP-dependent 3',5'-cyclic phosphodiesterase OS=Homo sapiens OX=9606 GN=PDE2A PE=1 SV=1	PDE2A	4	99	3	1		cell differentiation;metabolic process;regulation of biological process;response to stimulus;transport	cytoplasm;cytosol;endoplasmic reticulum;Golgi;membrane;mitochondrion;nucleus;organelle lumen	catalytic activity;metal ion binding;nucleotide binding;protein binding;transporter activity	Olfactory transduction; Aldosterone synthesis and secretion; cGMP-PKG signaling pathway; Morphine addiction; Purine metabolism	G alpha (s) signalling events; cGMP effects		0.0596 (df=2)	0.942187	0.94895			0.955036	0.992862									0.951422					0.124591	-0.0661331									-0.190724					[-0.9289 , 1.178]
O00410	Importin-5 OS=Homo sapiens OX=9606 GN=IPO5 PE=1 SV=4	IPO5	40	1468	36	1	Methyl [K212; K705]; Met-loss+Acetyl [N-Term]	regulation of biological process;response to stimulus;transport	cytoplasm;membrane;nucleus	enzyme regulator activity;protein binding;RNA binding;transporter activity		vRNP Assembly		2.1989 (df=5)	0.0620499	0.0978186	0.269473	0.122949	0.999999	0.935308	0.999971	0.991604	0.437277	0.999578	0.715188	0.232892	0.984142	0.509509	0.938076	0.999998	0.954287	-0.303947	-0.398979	0.0157187	-0.226965	0.0439949	-0.0950317	0.319666	0.0769816	0.347942	0.414697	0.172013	0.442973	-0.242684	0.0282762	0.27096	[-0.7152 , 0.1073]	[-0.8562 , 0.0582]	[-0.4735 , 0.505]
O00411	DNA-directed RNA polymerase, mitochondrial OS=Homo sapiens OX=9606 GN=POLRMT PE=1 SV=2	POLRMT	9	63	8	1		cell organization and biogenesis;metabolic process	mitochondrion;organelle lumen	catalytic activity;DNA binding;protein binding;RNA binding		Mitochondrial transcription initiation; Transcriptional activation of mitochondrial biogenesis	Mitochondrial Gene Expression	1.9802 (df=5)	0.0900355	0.133468	0.399554	0.984837	0.999998	0.654029	0.184625	0.909273	0.553771	0.998711	0.825348	0.985458	0.90648	0.455373	0.68202	0.227678	0.987214	-0.390131	-0.151443	0.0261347	-0.53005	-0.822381	0.238688	0.416266	-0.139918	-0.432249	0.177578	-0.378607	-0.670937	-0.556184	-0.848515	-0.292331	[-0.984 , 0.2037]	[-0.8117 , 0.5088]	[-0.6804 , 0.7326]
O00418	Eukaryotic elongation factor 2 kinase OS=Homo sapiens OX=9606 GN=EEF2K PE=1 SV=2	EEF2K; LOC101930123	4	37	4	1		metabolic process;regulation of biological process;response to stimulus	cytoplasm;cytosol	catalytic activity;metal ion binding;nucleotide binding;protein binding;RNA binding	Oxytocin signaling pathway; AMPK signaling pathway	mTORC1-mediated signalling	Translation Factors; AMP-activated Protein Kinase (AMPK) Signaling; BDNF-TrkB Signaling	1.983 (df=5)	0.0896211	0.133055	0.99721	0.948563	0.619833	0.795184	0.358135	0.803111	0.85949	0.918117	0.539528	0.262995	0.495382	0.156295	0.999976	0.960835	0.994076	-0.103698	0.220246	-0.417224	-0.490213	-0.761428	0.323944	-0.313526	-0.386516	-0.657731	-0.63747	-0.71046	-0.981675	-0.0729894	-0.344204	-0.271215	[-0.755 , 0.5476]	[-0.5039 , 0.9444]	[-1.1921 , 0.3577]
O00422	Histone deacetylase complex subunit SAP18 OS=Homo sapiens OX=9606 GN=SAP18 PE=1 SV=1	SAP18	15	1032	15	1	Methyl [K67]; Met-loss+Acetyl [N-Term]	cell organization and biogenesis;metabolic process;regulation of biological process	cytoplasm;cytosol;nucleus	catalytic activity;protein binding;RNA binding	RNA transport; mRNA surveillance pathway	HDACs deacetylate histones; NoRC negatively regulates rRNA expression	Hedgehog Signaling Pathway	2.4739 (df=5)	0.0386063	0.0665195	0.757872	0.994582	0.992271	0.949539	0.0377876	0.540681	0.994323	0.999999	0.245224	0.925024	0.850438	0.0229903	0.99768	0.159167	0.570099	0.458243	-0.202235	0.233587	0.515468	1.76441	-0.660478	-0.224656	0.0572252	1.30617	0.435822	0.717703	1.96665	0.281882	1.53082	1.24894	[-0.5341 , 1.4506]	[-1.3056 , 0.9012]	[-0.9471 , 1.4142]
O00423	Echinoderm microtubule-associated protein-like 1 OS=Homo sapiens OX=9606 GN=EML1 PE=1 SV=3	EML1	7	101	6	1		cell differentiation;cell organization and biogenesis;cell proliferation	cytoplasm;cytoskeleton;cytosol	metal ion binding;protein binding				2.3173 (df=5)	0.0506238	0.0831238	0.999979	0.0971882	0.999532	0.751475	0.93207	0.0829486	0.999978	0.703813	0.904678	0.127923	0.999376	0.97789	0.688843	0.886206	0.999576	-0.0608176	1.05113	-0.136197	0.831832	0.581735	1.11195	-0.0753797	0.892649	0.642553	-1.18733	-0.219302	-0.469399	0.968029	0.717932	-0.250097	[-1.1021 , 0.9805]	[-0.1067 , 2.2089]	[-1.375 , 1.1027]
O00425	Insulin-like growth factor 2 mRNA-binding protein 3 OS=Homo sapiens OX=9606 GN=IGF2BP3 PE=1 SV=2	IGF2BP3	23	330	21	1		metabolic process;regulation of biological process;transport	cytoplasm;cytosol;membrane;nucleus	protein binding;RNA binding;translation regulator activity		Insulin-like Growth Factor-2 mRNA Binding Proteins (IGF2BPs/IMPs/VICKZs) bind RNA		4.1909 (df=5)	0.00191123	0.00569233	0.956272	0.959011	0.530535	0.912658	0.00799851	1	0.182808	0.995742	0.0384813	0.224878	0.997741	0.0579508	0.333444	0.000473485	0.375772	-0.153602	-0.16818	0.36576	-0.312589	-1.09774	-0.0145776	0.519362	-0.158987	-0.944134	0.53394	-0.144409	-0.929556	-0.678349	-1.4635	-0.785147	[-0.6787 , 0.3715]	[-0.7521 , 0.4157]	[-0.259 , 0.9905]
O00429	Dynamin-1-like protein OS=Homo sapiens OX=9606 GN=DNM1L PE=1 SV=2	DNM1L	44	2278	44	1	Methyl [K10; K75; K339; K692]; Acetyl [N-Term]	cell death;cell organization and biogenesis;regulation of biological process;response to stimulus;transport	cytoplasm;cytoskeleton;cytosol;endoplasmic reticulum;Golgi;membrane;mitochondrion	catalytic activity;enzyme regulator activity;nucleotide binding;protein binding	TNF signaling pathway; NOD-like receptor signaling pathway	Apoptotic execution phase	Synaptic Vesicle Pathway	10.108 (df=5)	1.39177e-07	2.22227e-06	0.185064	0.894052	0.233185	0.838734	3.57825e-05	0.0321147	0.00131211	0.999976	1.64535e-07	0.871141	0.478067	0.00108434	0.125065	0.0201412	9.384e-05	-0.229572	0.115425	0.259382	-0.19977	0.846961	0.344997	0.488954	0.0298018	1.07653	0.143957	-0.315195	0.731536	-0.459152	0.587579	1.04673	[-0.5142 , 0.055]	[-0.201 , 0.4318]	[-0.0792 , 0.5979]
O00442	RNA 3'-terminal phosphate cyclase OS=Homo sapiens OX=9606 GN=RTCA PE=1 SV=1	RTCA	16	567	16	1		metabolic process	nucleus	catalytic activity;nucleotide binding;RNA binding				2.0046 (df=5)	0.0864023	0.12909	1	0.993915	0.998236	0.147418	0.762268	0.993858	0.998124	0.162044	0.765639	0.999999	0.090734	0.936196	0.122015	0.926569	0.0487768	-0.00297894	0.0878468	0.0723464	-0.609024	0.331233	0.0908257	0.0753253	-0.606045	0.334212	-0.0155004	-0.696871	0.243386	-0.681371	0.258887	0.940257	[-0.4235 , 0.4175]	[-0.3797 , 0.5554]	[-0.4279 , 0.5726]
O00443	Phosphatidylinositol 4-phosphate 3-kinase C2 domain-containing subunit alpha OS=Homo sapiens OX=9606 GN=PIK3C2A PE=1 SV=2	PIK3C2A	5	116	4	1		cell organization and biogenesis;cellular component movement;metabolic process;regulation of biological process;response to stimulus;transport	cytoplasm;cytosol;Golgi;membrane;nucleus	catalytic activity;nucleotide binding;protein binding	Inositol phosphate metabolism; Metabolic pathways; Phosphatidylinositol signaling system	Synthesis of PIPs at the Golgi membrane; Synthesis of PIPs at the early endosome membrane; Synthesis of PIPs at the late endosome membrane; Clathrin-mediated endocytosis; Synthesis of PIPs at the plasma membrane; Golgi Associated Vesicle Biogenesis	Signaling Pathways in Glioblastoma; Angiopoietin Like Protein 8 Regulatory Pathway; Focal Adhesion-PI3K-Akt-mTOR-signaling pathway; Microglia Pathogen Phagocytosis Pathway; Insulin Signaling; Regulation of Actin Cytoskeleton; DNA Damage Response (only ATM dependent)	3.8462 (df=4)	0.00671084	0.0159423	0.193654	0.237741	0.767857	0.315848		0.999899	0.032894	0.945138		0.0453497	0.969454		0.101616			-0.598376	-0.644145	0.379161	-0.983055		-0.0457694	0.977537	-0.384679		1.02331	-0.33891		-1.36222			[-1.361 , 0.1642]	[-1.5079 , 0.2196]	[-0.5258 , 1.2841]
O00459	Phosphatidylinositol 3-kinase regulatory subunit beta OS=Homo sapiens OX=9606 GN=PIK3R2 PE=1 SV=2	PIK3R2	8	177	3	1		cellular component movement;cellular homeostasis;metabolic process;regulation of biological process;response to stimulus;transport	cytosol;nucleus	catalytic activity;enzyme regulator activity;protein binding	HIF-1 signaling pathway; Melanoma; Estrogen signaling pathway; Viral carcinogenesis; ErbB signaling pathway; Hepatitis C; Rap1 signaling pathway; Leukocyte transendothelial migration; MicroRNAs in cancer; Focal adhesion; PI3K-Akt signaling pathway; TNF signaling pathway; Phosphatidylinositol signaling system; Axon guidance; Breast cancer; Small cell lung cancer; Neurotrophin signaling pathway; mT…	PI3K Cascade; Tie2 Signaling; Downstream TCR signaling; Rho GTPase cycle; G beta:gamma signalling through PI3Kgamma; Interleukin-7 signaling; Downstream signal transduction; PI3K/AKT activation; Nephrin family interactions; DAP12 signaling; Regulation of signaling by CBL; Constitutive Signaling by Aberrant PI3K in Cancer; Role of phospholipids in phagocytosis; G alpha (12/13) signalling events; P…	IL-5 Signaling Pathway; Androgen receptor signaling pathway; AMP-activated Protein Kinase (AMPK) Signaling; Regulation of toll-like receptor signaling pathway; MicroRNAs in cardiomyocyte hypertrophy; Integrin-mediated Cell Adhesion; IL-1 signaling pathway; RANKL/RANK (Receptor activator of NFKB (ligand)) Signaling Pathway; Human Thyroid Stimulating Hormone (TSH) signaling pathway; Leptin signalin…	7.8079 (df=5)	4.74715e-06	4.19372e-05	0.999992	0.999982	0.00682925	0.316859	0.00154604	0.999753	0.00706213	0.382412	0.00148561	0.0289755	0.317419	0.0042871	0.000857845	0.704191	0.00014252	-0.0239028	0.0307508	0.719433	-0.593601	1.16649	0.0546536	0.743336	-0.569699	1.1904	0.688682	-0.624352	1.13574	-1.31303	0.44706	1.76009	[-0.5192 , 0.4714]	[-0.5134 , 0.5749]	[0.1372 , 1.3016]
O00461	Golgi integral membrane protein 4 OS=Homo sapiens OX=9606 GN=GOLIM4 PE=1 SV=1	GOLIM4	13	120	13	1		transport	endosome;Golgi;membrane;organelle lumen			Intra-Golgi traffic		0.823 (df=5)	0.536793	0.587694	0.713256	0.976791	0.999477	0.929555	0.999559	0.994966	0.958213	0.494454	0.995839	0.999497	0.747954	0.999988	0.881129	0.999999	0.92249	0.399823	0.23011	0.109703	-0.462208	0.152807	-0.169713	-0.29012	-0.862032	-0.247016	-0.120407	-0.692319	-0.0773031	-0.571912	0.0431039	0.615016	[-0.4201 , 1.2197]	[-0.6815 , 1.1417]	[-0.8657 , 1.0851]
O00462	Beta-mannosidase OS=Homo sapiens OX=9606 GN=MANBA PE=1 SV=3	MANBA	7	158	6	1		metabolic process;transport	membrane;organelle lumen;vacuole	catalytic activity	Other glycan degradation; Lysosome	Neutrophil degranulation; Lysosomal oligosaccharide catabolism		3.2155 (df=5)	0.010553	0.0230279	0.775442	0.905686	0.599052	0.999807	0.00379002	0.99999	0.996633	0.909681	0.0424623	0.992294	0.947883	0.0444058	0.797221	0.143536	0.0288803	-0.365597	-0.318892	-0.52977	0.127604	-1.80503	0.0467051	-0.164173	0.493201	-1.43943	-0.210878	0.446496	-1.48614	0.657374	-1.27526	-1.93263	[-1.1761 , 0.4449]	[-1.2201 , 0.5823]	[-1.494 , 0.4345]
O00468-6	Isoform 6 of Agrin OS=Homo sapiens OX=9606 GN=AGRN	AGRN	48	963	48	1	Methyl [K1132; K1760]	cell organization and biogenesis;metabolic process;regulation of biological process;response to stimulus	cytosol;extracellular;membrane;organelle lumen	metal ion binding;protein binding;structural molecule activity	ECM-receptor interaction		Primary Focal Segmental Glomerulosclerosis FSGS	3.0174 (df=5)	0.0149398	0.0306671	0.375557	0.264591	0.929961	0.918587	0.791832	0.998738	0.126806	0.999991	0.170196	0.0869114	0.9988	0.120127	0.643723	0.992359	0.500013	0.354142	0.435831	-0.206026	0.308613	-0.399216	0.0816884	-0.560168	-0.0455294	-0.753359	-0.641856	-0.127218	-0.835047	0.514639	-0.193191	-0.707829	[-0.1737 , 0.882]	[-0.1511 , 1.0227]	[-0.834 , 0.4219]
O00469	Procollagen-lysine,2-oxoglutarate 5-dioxygenase 2 OS=Homo sapiens OX=9606 GN=PLOD2 PE=1 SV=2	PLOD2	13	101	13	1		metabolic process;response to stimulus	endoplasmic reticulum;membrane	catalytic activity;metal ion binding	Lysine degradation	Collagen biosynthesis and modifying enzymes		7.4105 (df=5)	8.6815e-06	6.80923e-05	0.744914	0.475785	0.532945	0.393149	7.94968e-05	0.994126	0.0711984	0.874221	0.0018182	0.0345625	0.978024	0.00914527	0.0555743	4.19967e-06	0.224406	-0.295196	-0.429734	0.437035	-0.712801	-1.79631	-0.134538	0.732231	-0.417605	-1.50111	0.866769	-0.283066	-1.36657	-1.14984	-2.23334	-1.08351	[-0.924 , 0.3336]	[-1.1289 , 0.2694]	[-0.3111 , 1.1851]
O00471	Exocyst complex component 5 OS=Homo sapiens OX=9606 GN=EXOC5 PE=1 SV=1	EXOC5	22	446	21	1	Met-loss+Acetyl [N-Term]	transport	cytoplasm;cytosol	protein binding		Translocation of GLUT4 to the plasma membrane; Insulin processing; VxPx cargo-targeting to cilium		2.8812 (df=5)	0.018971	0.0371528	0.919187	0.76063	0.342326	0.998559	0.268482	0.264953	0.0721403	0.999979	0.0860153	0.982779	0.830351	0.823694	0.556913	0.981014	0.366586	-0.134546	0.202371	0.325208	-0.0941131	0.502161	0.336916	0.459754	0.0404325	0.636706	0.122838	-0.296484	0.29979	-0.419321	0.176953	0.596274	[-0.5301 , 0.261]	[-0.2375 , 0.6422]	[-0.1454 , 0.7958]
O00478	Butyrophilin subfamily 3 member A3 OS=Homo sapiens OX=9606 GN=BTN3A3 PE=1 SV=1	BTN3A3	10	122	5	1	Methyl [K516]	response to stimulus	membrane	protein binding		Butyrophilin (BTN) family interactions		5.8231 (df=5)	0.000116932	0.000582823	0.478494	0.56648	0.999251	0.954722	0.00130174	0.0258199	0.467263	0.999973	0.0383074	0.889121	0.449132	6.34251e-05	0.90904	0.00171945	0.137564	-0.336882	0.34608	0.0791568	-0.27804	-1.32522	0.682962	0.416039	0.058842	-0.988336	-0.266923	-0.62412	-1.6713	-0.357197	-1.40437	-1.04718	[-0.8863 , 0.2125]	[-0.2648 , 0.9569]	[-0.5745 , 0.7328]
O00479	High mobility group nucleosome-binding domain-containing protein 4 OS=Homo sapiens OX=9606 GN=HMGN4 PE=1 SV=3	HMGN4	8	503	6	1	Methyl [K82]		chromosome;nucleus	DNA binding;protein binding				3.0848 (df=5)	0.013275	0.0277751	0.999824	0.707174	0.274888	0.527915	0.218338	0.854611	0.4265	0.446052	0.303545	0.977813	0.133328	0.797946	0.0447062	0.978504	0.0337071	0.0515124	0.312171	0.500144	-0.575677	0.763166	0.260658	0.448631	-0.62719	0.711654	0.187973	-0.887848	0.450995	-1.07582	0.263022	1.33884	[-0.5202 , 0.6232]	[-0.3235 , 0.9479]	[-0.18 , 1.1803]
O00481	Butyrophilin subfamily 3 member A1 OS=Homo sapiens OX=9606 GN=BTN3A1 PE=1 SV=3	BTN3A1	4	56	1	1		cell proliferation;regulation of biological process;response to stimulus;transport	membrane	protein binding		Butyrophilin (BTN) family interactions
O00483	Cytochrome c oxidase subunit NDUFA4 OS=Homo sapiens OX=9606 GN=NDUFA4 PE=1 SV=1	NDUFA4	5	418	5	1	Methyl [K73]	metabolic process;transport	membrane;mitochondrion	catalytic activity;protein binding;transporter activity	Alzheimer's disease; Non-alcoholic fatty liver disease (NAFLD); Parkinson's disease; Metabolic pathways; Oxidative phosphorylation; Huntington's disease	TP53 Regulates Metabolic Genes; Respiratory electron transport	Electron Transport Chain; Oxidative phosphorylation	6.011 (df=5)	8.54121e-05	0.000449677	0.915923	0.878795	0.958213	0.471338	1.18529e-05	0.999959	1	0.835761	0.000152554	0.99998	0.906037	0.000462656	0.870108	0.000456094	0.0818011	0.152914	0.187108	0.153222	0.471217	1.39653	0.0341948	0.000308426	0.318304	1.24362	-0.0338864	0.284109	1.20942	0.317995	1.24331	0.925314	[-0.2922 , 0.598]	[-0.3078 , 0.682]	[-0.3763 , 0.6827]
O00487	26S proteasome non-ATPase regulatory subunit 14 OS=Homo sapiens OX=9606 GN=PSMD14 PE=1 SV=1	PSMD14	15	693	15	1	Methyl [K40; K152; K246]	metabolic process;regulation of biological process;response to stimulus;transport	cytoplasm;cytosol;extracellular;nucleus;organelle lumen;proteasome	catalytic activity;enzyme regulator activity;metal ion binding;nucleotide binding;protein binding	Epstein-Barr virus infection; Proteasome	Regulation of RAS by GAPs; CDT1 association with the CDC6:ORC:origin complex; Downstream TCR signaling; UCH proteinases; NIK-->noncanonical NF-kB signaling; Hh mutants that don't undergo autocatalytic processing are degraded by ERAD; SCF-beta-TrCP mediated degradation of Emi1; Neutrophil degranulation; Cross-presentation of soluble exogenous antigens (endosomes); Separation of Sister Chromatids; …	Parkin-Ubiquitin Proteasomal System pathway	5.894 (df=5)	0.000103849	0.000530661	0.743421	0.0106984	0.182144	0.993867	0.11497	0.268832	0.847339	0.767129	0.0158284	0.968668	0.0962694	0.000230562	0.338532	0.00261829	0.626848	0.385144	1.07999	0.788548	-0.264463	-1.24046	0.694845	0.403405	-0.649607	-1.6256	-0.291441	-1.34445	-2.32045	-1.05301	-2.02901	-0.975997	[-0.4338 , 1.204]	[0.1695 , 1.9905]	[-0.1857 , 1.7628]
O00499	Myc box-dependent-interacting protein 1 OS=Homo sapiens OX=9606 GN=BIN1 PE=1 SV=1	BIN1	18	365	16	1	Methyl [K272]	cell differentiation;cell organization and biogenesis;cell proliferation;development;regulation of biological process;transport	cytoplasm;cytoskeleton;cytosol;membrane;nucleus	protein binding	Endocytosis; Fc gamma R-mediated phagocytosis	Clathrin-mediated endocytosis	VEGFA-VEGFR2 Signaling Pathway	1.9959 (df=5)	0.0876786	0.130543	0.934912	0.995266	0.302621	0.938121	0.291245	0.999567	0.803088	0.692617	0.637362	0.696142	0.83473	0.543999	0.249151	0.989772	0.189937	0.134124	0.0824311	0.354841	-0.227275	0.517203	-0.0516928	0.220717	-0.361399	0.383079	0.27241	-0.309706	0.434772	-0.582116	0.162362	0.744478	[-0.2822 , 0.5505]	[-0.3805 , 0.5453]	[-0.1405 , 0.8502]
O00505	Importin subunit alpha-4 OS=Homo sapiens OX=9606 GN=KPNA3 PE=1 SV=2	KPNA3	19	729	10	1	Methyl [K112; K121]; Met-loss+Acetyl [N-Term]	cell organization and biogenesis;regulation of biological process;transport	cytoplasm;cytosol;nucleus	protein binding;transporter activity		NS1 Mediated Effects on Host Pathways; ISG15 antiviral mechanism		0.8 (df=5)	0.552796	0.602502	0.885239	0.935631	1	0.999653	0.991666	0.436483	0.946509	0.939594	1	0.969245	0.999712	0.865497	0.999781	0.99396	0.983285	0.164723	-0.157921	-0.00126143	-0.0784273	0.152549	-0.322644	-0.165985	-0.243151	-0.0121744	0.156659	0.0794935	0.31047	-0.0771659	0.15381	0.230976	[-0.2774 , 0.6068]	[-0.6495 , 0.3336]	[-0.5272 , 0.5247]
O00506	Serine/threonine-protein kinase 25 OS=Homo sapiens OX=9606 GN=STK25 PE=1 SV=1	STK25	7	263	1	1		cell organization and biogenesis;metabolic process;regulation of biological process;response to stimulus	cytoplasm;Golgi;membrane	catalytic activity;metal ion binding;nucleotide binding;protein binding;signal transducer activity
O00507	Probable ubiquitin carboxyl-terminal hydrolase FAF-Y OS=Homo sapiens OX=9606 GN=USP9Y PE=2 SV=2	USP9Y	35	1366	1	1		cellular component movement;metabolic process;regulation of biological process;response to stimulus	cytoplasm	catalytic activity;protein binding
O00515	Ladinin-1 OS=Homo sapiens OX=9606 GN=LAD1 PE=1 SV=2	LAD1	25	536	25	1			extracellular	protein binding;structural molecule activity				8.2102 (df=5)	2.45617e-06	2.40896e-05	0.581891	0.997401	0.927534	0.971244	1.35427e-06	0.924122	0.217574	0.999977	8.4428e-05	0.805901	0.997517	1.46219e-05	0.764836	6.25564e-07	0.00248758	0.342002	0.106808	-0.241087	0.278601	2.1094	-0.235194	-0.583089	-0.0634009	1.7674	-0.347894	0.171793	2.0026	0.519688	2.35049	1.8308	[-0.2704 , 0.9544]	[-0.5741 , 0.7877]	[-0.9697 , 0.4875]
O00533	Neural cell adhesion molecule L1-like protein OS=Homo sapiens OX=9606 GN=CHL1 PE=1 SV=4	CHL1	10	51	10	1		cell differentiation;cell organization and biogenesis;cellular component movement;development;regulation of biological process;response to stimulus	extracellular;membrane	protein binding		CHL1 interactions		6.4326 (df=5)	4.24596e-05	0.000252832	0.795824	0.782208	0.999997	0.999986	6.57081e-05	0.176103	0.935786	0.947856	0.00128283	0.834382	0.986366	6.96514e-06	0.999931	0.000348817	0.00261927	-0.375648	0.425899	-0.0390903	0.0791857	-2.47327	0.801547	0.336558	0.454834	-2.09762	-0.464989	-0.346713	-2.89917	0.118276	-2.43418	-2.55246	[-1.2328 , 0.4815]	[-0.5272 , 1.379]	[-1.0589 , 0.9807]
O00534	von Willebrand factor A domain-containing protein 5A OS=Homo sapiens OX=9606 GN=VWA5A PE=1 SV=2	VWA5A	18	515	18	1								3.8265 (df=5)	0.00361189	0.00963257	0.70222	0.832274	0.208778	0.976364	0.165824	0.159518	0.0125195	0.628042	0.0228911	0.898253	1	0.637132	0.969073	0.973946	0.793076	0.348731	-0.32484	-0.660231	-0.307113	-0.999655	-0.673571	-1.00896	-0.655845	-1.34839	-0.335391	0.0177267	-0.674815	0.353117	-0.339424	-0.692541	[-0.3574 , 1.0549]	[-1.11 , 0.4603]	[-1.5003 , 0.1799]
O00541	Pescadillo homolog OS=Homo sapiens OX=9606 GN=PES1 PE=1 SV=1	PES1	22	618	22	1		cell organization and biogenesis;cell proliferation;metabolic process;regulation of biological process	chromosome;cytosol;membrane;nucleus	protein binding;RNA binding		Major pathway of rRNA processing in the nucleolus and cytosol		1.5443 (df=5)	0.185086	0.240873	0.884803	0.252022	0.995756	0.999997	0.914377	0.846458	0.998699	0.995426	0.588337	0.730316	0.813518	0.202832	0.999923	0.80702	0.954606	-0.142409	-0.319158	-0.0790281	-0.0250356	0.226127	-0.17675	0.0633805	0.117373	0.368536	0.24013	0.294123	0.545285	0.0539924	0.305155	0.251163	[-0.5242 , 0.2394]	[-0.7437 , 0.1054]	[-0.5333 , 0.3752]
O00560	Syntenin-1 OS=Homo sapiens OX=9606 GN=SDCBP PE=1 SV=1	SDCBP	22	1020	2	1	Methyl [K11; K14; K119; K124; K179; K185; K214; K223]; Met-loss+Acetyl [N-Term]	cell communication;cell organization and biogenesis;regulation of biological process;response to stimulus;transport	cytoplasm;cytoskeleton;cytosol;endoplasmic reticulum;extracellular;membrane;nucleus;organelle lumen	protein binding		Ephrin signaling; Neutrophil degranulation; Neurofascin interactions	Ectoderm Differentiation	3.0552 (df=5)	0.0139817	0.0289545	0.0392703	0.168212	0.874365	0.551241	0.951699	0.999682	0.740653	1	0.110646	0.909646	0.999997	0.202467	0.95984	0.650588	0.37226	-0.616891	-0.547153	-0.271685	-0.589676	0.30744	0.069738	0.345206	0.0272149	0.924331	0.275468	-0.0425231	0.854593	-0.317991	0.579125	0.897116	[-1.2151 , -0.0187]	[-1.2122 , 0.1179]	[-0.9833 , 0.4399]
O00560-2	Isoform 2 of Syntenin-1 OS=Homo sapiens OX=9606 GN=SDCBP	SDCBP	21	787	1	1	Methyl [K11; K14; K118; K123; K178; K184; K213; K222]; Met-loss+Acetyl [N-Term]	cell communication;cell organization and biogenesis;regulation of biological process;response to stimulus;transport	cytoplasm;cytoskeleton;cytosol;extracellular;membrane;nucleus;organelle lumen	protein binding			Ectoderm Differentiation
O00562	Membrane-associated phosphatidylinositol transfer protein 1 OS=Homo sapiens OX=9606 GN=PITPNM1 PE=1 SV=4	PITPNM1	6	41	5	1		metabolic process;regulation of biological process;response to stimulus;transport	cytoplasm;cytosol;endoplasmic reticulum;Golgi;membrane	metal ion binding;protein binding;transporter activity		Synthesis of PI		2.1577 (df=5)	0.0665901	0.103649	0.688038	0.995388	0.999651	0.999962	0.201706	0.486403	0.944694	0.986573	0.0288659	0.980289	0.99599	0.423305	1	0.193497	0.393365	-0.31416	0.123292	-0.0771438	-0.0710565	0.850834	0.437453	0.237017	0.243104	1.16499	-0.200436	-0.194349	0.727541	0.00608731	0.927977	0.92189	[-0.9403 , 0.312]	[-0.5729 , 0.8195]	[-0.8221 , 0.6678]
O00566	U3 small nucleolar ribonucleoprotein protein MPP10 OS=Homo sapiens OX=9606 GN=MPHOSPH10 PE=1 SV=2	MPHOSPH10	7	44	7	1		metabolic process;regulation of biological process	chromosome;nucleus	protein binding;RNA binding	Ribosome biogenesis in eukaryotes	Major pathway of rRNA processing in the nucleolus and cytosol; rRNA modification in the nucleus and cytosol		2.87 (df=5)	0.0193449	0.037713	0.706056	0.998059	0.899457	0.429894	0.107235	0.960468	0.25155	0.911093	0.505601	0.77724	0.659772	0.243706	0.168164	0.0319528	0.992743	-0.405687	-0.135356	0.353181	-0.905723	-1.26463	0.270332	0.758868	-0.500036	-0.858944	0.488537	-0.770368	-1.12928	-1.2589	-1.61781	-0.358908	[-1.2308 , 0.4194]	[-1.0527 , 0.782]	[-0.6284 , 1.3348]
O00567	Nucleolar protein 56 OS=Homo sapiens OX=9606 GN=NOP56 PE=1 SV=4	NOP56	36	2590	36	1	Methyl [K87; K143; K180; K320; K333; K422; K540]	metabolic process	cytoplasm;membrane;nucleus	protein binding;RNA binding	Ribosome biogenesis in eukaryotes	Major pathway of rRNA processing in the nucleolus and cytosol; Association of TriC/CCT with target proteins during biosynthesis; rRNA modification in the nucleus and cytosol		8.3874 (df=5)	1.86478e-06	1.95508e-05	0.99052	0.163798	0.587623	0.999966	4.11059e-05	0.057326	0.886805	0.999984	1.33703e-05	0.00936337	0.558603	0.0178444	0.953686	2.74484e-06	0.00176445	0.0748899	-0.332986	0.239273	0.0401305	-1.07021	-0.407876	0.164383	-0.0347594	-1.1451	0.572259	0.373117	-0.737227	-0.199142	-1.30949	-1.11034	[-0.2872 , 0.437]	[-0.7356 , 0.0696]	[-0.1915 , 0.6701]
O00571	ATP-dependent RNA helicase DDX3X OS=Homo sapiens OX=9606 GN=DDX3X PE=1 SV=3	DDX3X	48	4785	13	1	Methyl [K418; K440; K564]; Met-loss+Acetyl [N-Term]	cell death;cell organization and biogenesis;defense response;metabolic process;regulation of biological process;response to stimulus;transport	cytoplasm;cytosol;extracellular;membrane;mitochondrion;nucleus;organelle lumen	catalytic activity;DNA binding;enzyme regulator activity;nucleotide binding;protein binding;RNA binding	Hepatitis B; RIG-I-like receptor signaling pathway; Viral carcinogenesis	Neutrophil degranulation	RIG-I-like Receptor Signaling	4.1561 (df=5)	0.00203074	0.00599447	0.993191	0.893609	1	0.827995	0.000527224	0.994178	0.998351	0.951071	0.00202316	0.954822	0.996074	0.0100134	0.88153	0.00184675	0.162642	0.0777361	0.16397	0.00731788	0.288747	1.03423	0.0862337	-0.0704182	0.211011	0.956494	-0.156652	0.124778	0.870261	0.28143	1.02691	0.745483	[-0.3261 , 0.4816]	[-0.285 , 0.613]	[-0.4731 , 0.4877]
O00584	Ribonuclease T2 OS=Homo sapiens OX=9606 GN=RNASET2 PE=1 SV=2	RNASET2	9	365	9	1	Methyl [K153; K157]	metabolic process;transport	endoplasmic reticulum;extracellular;organelle lumen;vacuole	catalytic activity;RNA binding		Neutrophil degranulation		2.0458 (df=5)	0.0805673	0.121845	0.888729	0.998266	1	0.754558	0.21778	0.994697	0.932596	0.979633	0.0578631	0.998333	0.907667	0.162435	0.786699	0.319847	0.0691813	-0.206104	-0.0893676	0.0155252	-0.443767	0.744897	0.116736	0.221629	-0.237663	0.951001	0.104893	-0.354399	0.834265	-0.459292	0.729372	1.18866	[-0.7638 , 0.3516]	[-0.7095 , 0.5307]	[-0.648 , 0.679]
O00585	C-C motif chemokine 21 OS=Homo sapiens OX=9606 GN=CCL21 PE=1 SV=1	CCL21	6	54	6	1	Methyl [K50; K92]	cell communication;cell organization and biogenesis;cellular component movement;cellular homeostasis;defense response;regulation of biological process;response to stimulus;transport	extracellular	protein binding	Cytokine-cytokine receptor interaction; NF-kappa B signaling pathway; Chemokine signaling pathway	Chemokine receptors bind chemokines; G alpha (i) signalling events	Allograft Rejection; Chemokine signaling pathway	5.5952 (df=5)	0.000174196	0.000803988	0.983589	0.991383	0.223515	0.998587	0.0003809	0.856259	0.0757696	0.968644	0.000109153	0.659443	1	0.00337555	0.88968	0.0935475	0.0296377	-0.210767	0.207564	0.831322	0.213931	2.36128	0.418331	1.04209	0.424698	2.57204	0.623758	0.00636754	2.15371	-0.617391	1.52995	2.14734	[-1.114 , 0.6924]	[-0.8175 , 1.2326]	[-0.2432 , 1.9059]
O00592	Podocalyxin OS=Homo sapiens OX=9606 GN=PODXL PE=1 SV=2	PODXL	3	69	3	1		cellular component movement;regulation of biological process	cytoplasm;membrane	protein binding			Primary Focal Segmental Glomerulosclerosis FSGS; Ectoderm Differentiation; Hepatitis C and Hepatocellular Carcinoma	1.3969 (df=4)	0.242834	0.301713	0.752165	0.99023	0.6778	0.988291		0.974658	0.161123	0.999535		0.502437	0.999778		0.687967			-0.283285	-0.121958	0.371071	-0.196623		0.161327	0.654355	0.0866613		0.493029	-0.0746655		-0.567694			[-0.9433 , 0.3767]	[-0.8546 , 0.6107]	[-0.4122 , 1.1543]
O00602	Ficolin-1 OS=Homo sapiens OX=9606 GN=FCN1 PE=1 SV=2	FCN1	5	27	5	1	Methyl [K46]	defense response;metabolic process;regulation of biological process;response to stimulus;transport	extracellular;membrane;organelle lumen	catalytic activity;metal ion binding;protein binding;receptor activity;signal transducer activity		Ficolins bind to repetitive carbohydrate structures on the target cell surface; Neutrophil degranulation		2.4182 (df=5)	0.0425194	0.0719823	0.897829	0.999984	0.983721	0.987538	0.0594727	0.890064	0.650351	0.816728	0.246286	0.99678	0.995668	0.0662251	0.999986	0.0330028	0.0887631	0.278453	-0.0472378	-0.213644	-0.290385	1.29169	-0.325691	-0.492097	-0.568839	1.01324	-0.166406	-0.243148	1.33893	-0.0767413	1.50534	1.58208	[-0.4922 , 1.0491]	[-0.9041 , 0.8096]	[-1.1305 , 0.7032]
O00625	Pirin OS=Homo sapiens OX=9606 GN=PIR PE=1 SV=1	PIR	17	676	17	1	Methyl [K34; K46; K175; K231]	cell differentiation;metabolic process;regulation of biological process	cytoplasm;cytosol;nucleus	catalytic activity;metal ion binding;protein binding		Digestion		7.9655 (df=5)	3.60251e-06	3.34226e-05	5.04324e-05	0.00191369	0.811905	0.986828	0.00102011	0.9971	0.0589799	0.239813	0.808158	0.22965	0.445907	0.661266	0.999954	0.0343514	0.0837676	-0.71524	-0.637981	-0.213484	-0.160035	-1.0291	0.0772591	0.501756	0.555205	-0.313863	0.424497	0.477946	-0.391122	0.0534491	-0.815619	-0.869068	[-1.1348 , -0.2957]	[-1.1045 , -0.1715]	[-0.7126 , 0.2857]
O00629	Importin subunit alpha-3 OS=Homo sapiens OX=9606 GN=KPNA4 PE=1 SV=1	KPNA4	19	719	10	1	Methyl [K112; K440]	regulation of biological process;response to stimulus;transport	cytoplasm;cytosol;nucleus	protein binding;transporter activity		NS1 Mediated Effects on Host Pathways; ISG15 antiviral mechanism	Leptin signaling pathway	14.6291 (df=5)	2.85957e-10	1.30414e-08	0.95734	0.0237935	0.00375727	0.445968	2.34528e-07	0.00327434	0.000480121	0.76862	3.98709e-08	0.977585	0.00481848	0.00191988	0.00116204	0.0142637	2.6178e-07	-0.100478	0.420078	0.533948	-0.374036	1.27316	0.520556	0.634426	-0.273558	1.37364	0.11387	-0.794114	0.853082	-0.907984	0.739212	1.6472	[-0.446 , 0.2451]	[0.0359 , 0.8043]	[0.1229 , 0.945]
O00635	E3 ubiquitin-protein ligase TRIM38 OS=Homo sapiens OX=9606 GN=TRIM38 PE=1 SV=1	TRIM38	7	62	7	1		defense response;metabolic process;regulation of biological process;response to stimulus	cytosol	catalytic activity;metal ion binding;protein binding;signal transducer activity		Interferon gamma signaling		1.3115 (df=5)	0.267136	0.327499	0.905381	0.99898	0.659188	0.999998	0.919669	0.994538	0.200429	0.982098	0.998887	0.546842	0.999475	0.980297	0.951599	0.418597	0.958892	-0.271559	-0.110047	0.472004	0.0458276	-0.446786	0.161512	0.743563	0.317386	-0.175228	0.582051	0.155875	-0.336739	-0.426177	-0.91879	-0.492614	[-1.0383 , 0.4952]	[-0.9626 , 0.7425]	[-0.4402 , 1.3842]
O00712	Nuclear factor 1 B-type OS=Homo sapiens OX=9606 GN=NFIB PE=1 SV=2	NFIB	4	186	2	1		cell differentiation;cell organization and biogenesis;cellular component movement;metabolic process;regulation of biological process	nucleus	DNA binding		RNA Polymerase III Abortive And Retractive Initiation; RNA Polymerase III Transcription Termination	Pathways Affected in Adenoid Cystic Carcinoma	6.6581 (df=5)	3.05908e-05	0.000192542	0.999988	0.000881468	0.999503	0.854617	0.0315491	0.00097843	0.997852	0.899294	0.0285838	0.0177138	0.00472779	0.999739	0.794577	0.0967752	0.01892	0.0898926	-2.76433	-0.223126	1.14882	-3.06345	-2.85422	-0.313018	1.05893	-3.15334	2.5412	3.91315	-0.29912	1.37195	-2.84032	-4.21227	[-1.6167 , 1.7965]	[-4.6778 , -0.8509]	[-2.229 , 1.7827]
O00743	Serine/threonine-protein phosphatase 6 catalytic subunit OS=Homo sapiens OX=9606 GN=PPP6C PE=1 SV=1	PPP6C	15	526	15	1	Methyl [K8]; Met-loss [N-Term]	cell organization and biogenesis;metabolic process	cytoplasm;cytosol;membrane	catalytic activity;metal ion binding;protein binding		COPII (Coat Protein 2) Mediated Vesicle Transport		2.3223 (df=5)	0.0501894	0.0824846	1	0.97965	0.960693	0.792371	0.0691467	0.986328	0.971307	0.7878	0.0806323	0.99999	0.561004	0.243941	0.52107	0.325154	0.0276385	0.0080561	0.143913	0.179251	-0.399247	0.866817	0.135857	0.171195	-0.407303	0.858761	0.0353382	-0.54316	0.722904	-0.578498	0.687566	1.26606	[-0.5202 , 0.5363]	[-0.4435 , 0.7313]	[-0.4493 , 0.8078]
O00746	Nucleoside diphosphate kinase, mitochondrial OS=Homo sapiens OX=9606 GN=NME4 PE=1 SV=1	NME4	6	49	6	1		metabolic process;regulation of biological process;transport	membrane;mitochondrion;organelle lumen	catalytic activity;metal ion binding;nucleotide binding;protein binding	Purine metabolism; Metabolic pathways; Pyrimidine metabolism	Interconversion of nucleotide di- and triphosphates		9.6307 (df=5)	2.81857e-07	4.00138e-06	0.154427	0.761882	1	0.225792	3.95511e-06	0.0118708	0.343421	0.963352	0.00120565	0.873581	0.044096	3.88918e-07	0.299856	2.09644e-05	0.114257	-0.880175	0.537285	0.00788915	-1.39337	-3.46564	1.41746	0.888064	-0.513198	-2.58547	-0.529396	-1.93066	-4.00293	-1.40126	-3.47353	-2.07227	[-1.9322 , 0.1718]	[-0.6324 , 1.707]	[-1.2437 , 1.2594]
O00750	Phosphatidylinositol 4-phosphate 3-kinase C2 domain-containing subunit beta OS=Homo sapiens OX=9606 GN=PIK3C2B PE=1 SV=2	PIK3C2B	2	9	2	1		cell communication;cellular component movement;metabolic process;regulation of biological process;response to stimulus	cytoplasm;cytosol;endoplasmic reticulum;membrane;nucleus	catalytic activity;nucleotide binding;protein binding	Inositol phosphate metabolism; Phosphatidylinositol signaling system; Metabolic pathways	Synthesis of PIPs at the plasma membrane	Signaling Pathways in Glioblastoma; Signal Transduction of S1P Receptor; Focal Adhesion-PI3K-Akt-mTOR-signaling pathway; EGF/EGFR Signaling Pathway; Regulation of Actin Cytoskeleton; DNA Damage Response (only ATM dependent)
O00754	Lysosomal alpha-mannosidase OS=Homo sapiens OX=9606 GN=MAN2B1 PE=1 SV=3	MAN2B1	23	392	22	1		metabolic process;transport	extracellular;organelle lumen;vacuole	catalytic activity;metal ion binding	Other glycan degradation; Lysosome	Neutrophil degranulation; Lysosomal oligosaccharide catabolism		4.1808 (df=5)	0.00194501	0.00577646	0.999985	0.914417	0.552977	0.198533	0.00272456	0.959765	0.666756	0.250918	0.0043838	0.985526	0.611941	0.0330227	0.891351	0.129718	0.832436	0.0234597	0.164518	0.292588	0.584567	0.979817	0.141059	0.269128	0.561107	0.956357	0.12807	0.420049	0.815298	0.291979	0.687229	0.39525	[-0.4053 , 0.4522]	[-0.3122 , 0.6412]	[-0.2175 , 0.8026]
O00757	Fructose-1,6-bisphosphatase isozyme 2 OS=Homo sapiens OX=9606 GN=FBP2 PE=1 SV=2	FBP2	4	130	2	1		metabolic process	cytoplasm;cytosol;membrane;nucleus	catalytic activity;metal ion binding;protein binding	Carbon metabolism; AMPK signaling pathway; Metabolic pathways; Fructose and mannose metabolism; Insulin signaling pathway; Glycolysis / Gluconeogenesis; Pentose phosphate pathway	Gluconeogenesis	Glycolysis and Gluconeogenesis	11.3354 (df=4)	3.01314e-07	4.23639e-06	0.0835158	0.0101197	0.00726036	0.00423732		0.798538	0.671308	2.26986e-05		0.999159	3.73389e-06		2.87778e-06			-0.95968	-1.44957	-1.57562	2.31367		-0.489894	-0.615944	3.27335		-0.126051	3.76325		3.8893			[-1.9975 , 0.0781]	[-2.6514 , -0.2478]	[-2.8409 , -0.3104]
O00763	Acetyl-CoA carboxylase 2 OS=Homo sapiens OX=9606 GN=ACACB PE=1 SV=3	ACACB	16	129	10	1		cell organization and biogenesis;metabolic process;regulation of biological process;response to stimulus;transport	cytosol;membrane;mitochondrion;nucleus	catalytic activity;metal ion binding;nucleotide binding;protein binding	Insulin signaling pathway; Adipocytokine signaling pathway; Fatty acid biosynthesis; Metabolic pathways; Glucagon signaling pathway; Pyruvate metabolism; Propanoate metabolism; Insulin resistance; AMPK signaling pathway	ChREBP activates metabolic gene expression; Import of palmitoyl-CoA into the mitochondrial matrix; Biotin transport and metabolism; Activation of gene expression by SREBF (SREBP)	AMP-activated Protein Kinase (AMPK) Signaling; Leptin signaling pathway; Brain-Derived Neurotrophic Factor (BDNF) signaling pathway; Fatty Acid Biosynthesis; VEGFA-VEGFR2 Signaling Pathway	1.412 (df=5)	0.228449	0.286621	0.996613	0.775236	0.930739	0.687498	0.999499	0.537385	0.994666	0.520619	0.99082	0.365301	0.992025	0.995989	0.369828	0.94209	0.950978	0.11616	-0.351359	0.272607	-0.603256	-0.133972	-0.467519	0.156447	-0.719416	-0.250132	0.623966	-0.251897	0.217387	-0.875863	-0.406579	0.469284	[-0.5842 , 0.8165]	[-1.1301 , 0.4274]	[-0.5606 , 1.1058]
O00764	Pyridoxal kinase OS=Homo sapiens OX=9606 GN=PDXK PE=1 SV=1	PDXK	16	1124	16	1		cell proliferation;metabolic process;transport	cytoplasm;cytosol;extracellular;nucleus;organelle lumen	catalytic activity;metal ion binding;nucleotide binding;protein binding	Vitamin B6 metabolism; Metabolic pathways	Vitamins B6 activation to pyridoxal phosphate; Neutrophil degranulation		8.8008 (df=5)	9.86614e-07	1.15559e-05	0.64229	0.0417896	0.975409	0.0247703	1.58885e-05	0.630362	0.361384	0.226625	0.000620922	0.0233044	0.845438	0.0256993	0.0122179	1.12512e-05	0.596549	-0.28183	-0.609073	0.162886	-0.99979	-1.65688	-0.327243	0.444717	-0.71796	-1.37505	0.77196	-0.390717	-1.04781	-1.16268	-1.81976	-0.657088	[-0.8171 , 0.2535]	[-1.2043 , -0.0139]	[-0.474 , 0.7997]
O00767	Stearoyl-CoA desaturase OS=Homo sapiens OX=9606 GN=SCD PE=1 SV=2	SCD	5	45	5	1		metabolic process;regulation of biological process	endoplasmic reticulum;membrane	catalytic activity;metal ion binding	PPAR signaling pathway; Fatty acid metabolism; AMPK signaling pathway; Biosynthesis of unsaturated fatty acids	Fatty acyl-CoA biosynthesis; Activation of gene expression by SREBF (SREBP)	Sterol Regulatory Element-Binding Proteins (SREBP) signalling; SREBF and miR33 in cholesterol and lipid homeostasis; Adipogenesis; Liver X Receptor Pathway; Fatty Acid Biosynthesis; Angiopoietin Like Protein 8 Regulatory Pathway; PPAR signaling pathway	1.7593 (df=5)	0.130296	0.180892	0.484094	0.195668	1	0.861584	0.653403	0.981177	0.685891	0.999998	0.996904	0.365002	0.99933	1	0.893513	0.719381	0.999721	-0.696783	-1.01218	0.00548343	-0.768112	-1.01994	-0.315397	0.702266	-0.0713293	-0.323159	1.01766	0.244067	-0.0077622	-0.773595	-1.02542	-0.25183	[-1.8387 , 0.4452]	[-2.2819 , 0.2575]	[-1.3531 , 1.3641]
O14494	Phospholipid phosphatase 1 OS=Homo sapiens OX=9606 GN=PLPP1 PE=1 SV=1	PPAP2A; PLPP1	2	5	2	1		cellular component movement;metabolic process;regulation of biological process;response to stimulus	membrane	catalytic activity	Phospholipase D signaling pathway; Fc gamma R-mediated phagocytosis; Sphingolipid metabolism; Ether lipid metabolism; Glycerophospholipid metabolism; Glycerolipid metabolism; Fat digestion and absorption; Metabolic pathways; Choline metabolism in cancer	Sphingolipid de novo biosynthesis	Androgen receptor signaling pathway; Sphingolipid Metabolism; Triacylglyceride Synthesis
O14495	Phospholipid phosphatase 3 OS=Homo sapiens OX=9606 GN=PLPP3 PE=1 SV=1	PPAP2B; PLPP3	2	70	2	1		cellular component movement;metabolic process;regulation of biological process;response to stimulus	Golgi;membrane	catalytic activity;protein binding	Ether lipid metabolism; Metabolic pathways; Sphingolipid metabolism; Glycerophospholipid metabolism; Phospholipase D signaling pathway; Fat digestion and absorption; Fc gamma R-mediated phagocytosis; Choline metabolism in cancer; Glycerolipid metabolism	Sphingolipid de novo biosynthesis	Triacylglyceride Synthesis	2.2872 (df=5)	0.0534373	0.0867377	0.999976	0.732924	0.789814	0.992858	0.244767	0.838748	0.727668	0.985636	0.215279	0.19014	0.729883	0.0521595	0.999649	0.779397	0.754613	0.068526	0.601332	-0.597036	-0.378796	-1.62323	0.532806	-0.665562	-0.447322	-1.69176	-1.19837	-0.980128	-2.22457	0.218241	-1.0262	-1.24444	[-1.067 , 1.204]	[-0.6612 , 1.8639]	[-1.948 , 0.7539]
O14497	AT-rich interactive domain-containing protein 1A OS=Homo sapiens OX=9606 GN=ARID1A PE=1 SV=3	ARID1A	14	181	13	1		cell differentiation;cell organization and biogenesis;metabolic process;regulation of biological process;response to stimulus;transport	nucleus	DNA binding;protein binding		RUNX1 interacts with co-factors whose precise effect on RUNX1 targets is not known; RMTs methylate histone arginines	Pathways Affected in Adenoid Cystic Carcinoma	3.9748 (df=5)	0.00278636	0.00779005	0.99998	0.999949	0.951126	0.63659	0.00168265	0.999319	0.979783	0.710862	0.00281575	0.927534	0.604733	0.00217003	0.953252	0.025615	0.402883	-0.0228107	0.0305705	-0.140008	-0.355939	-0.927909	0.0533812	-0.117197	-0.333129	-0.905098	-0.170578	-0.38651	-0.95848	-0.215932	-0.787902	-0.57197	[-0.4146 , 0.3689]	[-0.405 , 0.4661]	[-0.6061 , 0.3261]
O14498	Immunoglobulin superfamily containing leucine-rich repeat protein OS=Homo sapiens OX=9606 GN=ISLR PE=2 SV=1	ISLR	4	51	4	1		transport	extracellular;organelle lumen	protein binding		Platelet degranulation		4.8022 (df=4)	0.00161117	0.00496065	0.994312	0.000900162	0.55927	0.857963		0.00446425	0.785395	0.944537		0.228117	0.510692		0.999999			-0.100973	-1.14282	-0.449509	-0.426162		-1.04185	-0.348536	-0.325188		0.69331	0.716657		0.0233475			[-0.7996 , 0.5977]	[-1.9196 , -0.366]	[-1.2807 , 0.3817]
O14519	Cyclin-dependent kinase 2-associated protein 1 OS=Homo sapiens OX=9606 GN=CDK2AP1 PE=1 SV=1	CDK2AP1	3	24	3	1		metabolic process;regulation of biological process	cytosol;nucleus	protein binding				2.5864 (df=5)	0.0317501	0.0565403	0.765333	0.53523	0.368282	0.97317	0.0664061	0.996558	0.961957	0.653649	0.350318	0.999342	0.490095	0.588392	0.3694	0.766228	0.0769925	0.36872	0.522682	0.647788	-0.361017	1.33079	0.153962	0.279068	-0.729736	0.962068	0.125106	-0.883698	0.808106	-1.0088	0.683	1.6918	[-0.4376 , 1.1751]	[-0.3739 , 1.4193]	[-0.3115 , 1.6071]
O14521	Succinate dehydrogenase [ubiquinone] cytochrome b small subunit, mitochondrial OS=Homo sapiens OX=9606 GN=SDHD PE=1 SV=1	SDHD	2	50	2	1		metabolic process;transport	membrane;mitochondrion	catalytic activity;metal ion binding	Oxidative phosphorylation; Huntington's disease; Metabolic pathways; Alzheimer's disease; Carbon metabolism; Non-alcoholic fatty liver disease (NAFLD); Parkinson's disease; Citrate cycle (TCA cycle)	Respiratory electron transport; Citric acid cycle (TCA cycle)	Electron Transport Chain; Amino Acid metabolism; TCA Cycle	0.3588 (df=4)	0.837164	0.857614	0.848618	0.999976	0.999605	0.955636		0.934321	0.969783	0.999967		0.999978	0.974094		0.985331			-0.230888	-0.0257071	-0.0553294	-0.274194		0.205181	0.175559	-0.043306		-0.0296223	-0.248487		-0.218865			[-0.8671 , 0.4054]	[-0.7331 , 0.6817]	[-0.8123 , 0.7016]
O14524	Nuclear envelope integral membrane protein 1 OS=Homo sapiens OX=9606 GN=NEMP1 PE=1 SV=2	TMEM194A; NEMP1	4	35	4	1			membrane;nucleus					1.7289 (df=5)	0.137152	0.188636	0.640506	0.383259	0.92191	0.525256	0.919151	0.994173	0.999655	0.965206	0.47952	0.974322	0.997989	0.324737	0.93004	0.658551	0.330276	-0.338258	-0.475212	-0.257235	-0.647301	0.411855	-0.136954	0.0810222	-0.309044	0.750113	0.217976	-0.17209	0.887067	-0.390066	0.669091	1.05916	[-0.9797 , 0.3032]	[-1.1885 , 0.238]	[-1.0204 , 0.5059]
O14526	F-BAR domain only protein 1 OS=Homo sapiens OX=9606 GN=FCHO1 PE=1 SV=2	FCHO1	5	12	5	1		cell organization and biogenesis;transport	cytosol;membrane	protein binding		Cargo recognition for clathrin-mediated endocytosis		9.9052 (df=5)	1.95494e-07	2.95734e-06	0.739239	0.154142	0.969951	0.547333	1.64853e-07	0.849288	0.407974	0.953771	6.4693e-06	0.0694052	0.999999	0.000267741	0.315627	1.34607e-07	0.00680487	-0.382501	-0.751826	0.257139	-0.795884	-3.00624	-0.369325	0.63964	-0.413383	-2.62374	1.00896	-0.0440582	-2.25442	-1.05302	-3.26338	-2.21036	[-1.1918 , 0.4268]	[-1.6502 , 0.1465]	[-0.7032 , 1.2175]
O14530	Thioredoxin domain-containing protein 9 OS=Homo sapiens OX=9606 GN=TXNDC9 PE=1 SV=2	TXNDC9	8	138	8	1		cellular homeostasis;metabolic process;regulation of biological process	cytoplasm;cytoskeleton;nucleus	catalytic activity;protein binding				4.8044 (df=5)	0.000660459	0.00239889	0.400341	0.798613	0.976271	0.285143	0.000203507	0.997949	0.9578	0.918392	0.0110875	0.998522	0.818574	0.00696918	0.671129	0.00372756	0.40075	-0.479119	-0.354149	-0.220274	-0.911839	-1.97937	0.12497	0.258846	-0.432719	-1.50025	0.133876	-0.55769	-1.62522	-0.691565	-1.75909	-1.06753	[-1.2089 , 0.2507]	[-1.1656 , 0.4573]	[-1.0885 , 0.648]
O14531	Dihydropyrimidinase-related protein 4 OS=Homo sapiens OX=9606 GN=DPYSL4 PE=1 SV=2	DPYSL4	5	174	5	1		cell death;cellular component movement	cytoplasm;cytosol	catalytic activity;protein binding		CRMPs in Sema3A signaling		3.6821 (df=5)	0.00465163	0.0118433	0.860892	0.888651	0.864075	0.0592379	0.00722034	1	0.999979	0.270152	0.0549944	0.999997	0.326094	0.0773029	0.404623	0.111639	0.992932	-0.216239	-0.226381	-0.255626	-0.923794	-1.16206	-0.0101419	-0.0393868	-0.707555	-0.945818	-0.029245	-0.697413	-0.935676	-0.668168	-0.906431	-0.238263	[-0.7671 , 0.3346]	[-0.8389 , 0.3861]	[-0.911 , 0.3997]
O14545	TRAF-type zinc finger domain-containing protein 1 OS=Homo sapiens OX=9606 GN=TRAFD1 PE=1 SV=1	TRAFD1	7	72	6	1		regulation of biological process;response to stimulus		metal ion binding;protein binding			Regulation of toll-like receptor signaling pathway	0.236 (df=5)	0.945556	0.951424	0.957799	0.996561	0.999952	1	0.9705	0.999809	0.996201	0.996511	0.999755	0.999913	0.999667	0.997833	0.999995	0.991415	0.990817	0.319764	0.203957	0.0906672	-0.000204106	0.504503	-0.115807	-0.229097	-0.319968	0.184739	-0.11329	-0.204161	0.300546	-0.0908713	0.413836	0.504707	[-0.7827 , 1.4222]	[-1.0219 , 1.4298]	[-1.221 , 1.4023]
O14548	Cytochrome c oxidase subunit 7A-related protein, mitochondrial OS=Homo sapiens OX=9606 GN=COX7A2L PE=1 SV=2	COX7A2L	6	121	6	1		metabolic process;transport	membrane;mitochondrion	catalytic activity;transporter activity	Parkinson's disease; Oxidative phosphorylation; Huntington's disease; Non-alcoholic fatty liver disease (NAFLD); Cardiac muscle contraction; Alzheimer's disease	TP53 Regulates Metabolic Genes; Respiratory electron transport	Electron Transport Chain	3.2873 (df=5)	0.00930118	0.0208032	0.959856	0.993097	0.110132	0.997585	0.379502	0.999971	0.0225984	1	0.70037	0.0638816	0.999999	0.660974	0.307176	0.0104199	0.856693	-0.151342	-0.113349	0.558653	-0.139929	-0.605737	0.0379934	0.709995	0.0114134	-0.454394	0.672001	-0.02658	-0.492388	-0.698581	-1.16439	-0.465808	[-0.6794 , 0.3767]	[-0.7004 , 0.4737]	[-0.0695 , 1.1868]
O14556	Glyceraldehyde-3-phosphate dehydrogenase, testis-specific OS=Homo sapiens OX=9606 GN=GAPDHS PE=1 SV=2	GAPDHS	23	6961	12	1	Methyl [K287; K331; K381]	cellular component movement;metabolic process;regulation of biological process	cytoplasm;cytosol;nucleus	catalytic activity;nucleotide binding;protein binding	Metabolic pathways; Glycolysis / Gluconeogenesis	Gluconeogenesis; Glycolysis; Association of TriC/CCT with target proteins during biosynthesis	Glycolysis and Gluconeogenesis	9.9137 (df=5)	1.85257e-07	2.834e-06	0.862951	0.993652	0.995043	0.852314	1.49885e-08	0.997389	0.998229	0.996299	3.97879e-07	1	0.972458	3.01381e-07	0.976188	6.23508e-07	0.000434037	-0.317255	-0.171088	-0.173617	-0.555735	-3.28859	0.146167	0.143638	-0.23848	-2.97134	-0.0025291	-0.384647	-3.1175	-0.382118	-3.11498	-2.73286	[-1.1288 , 0.4943]	[-1.0734 , 0.7312]	[-1.1391 , 0.7918]
O14558	Heat shock protein beta-6 OS=Homo sapiens OX=9606 GN=HSPB6 PE=1 SV=2	HSPB6	10	379	10	1	Methyl [K81; K91]; Acetyl [N-Term]	metabolic process;regulation of biological process	cytoplasm;extracellular;nucleus	protein binding;structural molecule activity				5.2649 (df=5)	0.000300285	0.00125032	1	0.779552	0.0571066	0.34463	0.166462	0.780048	0.0760684	0.34504	0.168539	0.00508571	0.877607	0.677996	0.00503468	0.00148405	0.999647	0.0079202	-0.254354	0.596058	-0.603462	-0.721456	-0.262274	0.588138	-0.611383	-0.729376	0.850412	-0.349109	-0.467102	-1.19952	-1.31751	-0.117994	[-0.5021 , 0.5179]	[-0.8214 , 0.3127]	[-0.0107 , 1.2028]
O14561	Acyl carrier protein, mitochondrial OS=Homo sapiens OX=9606 GN=NDUFAB1 PE=1 SV=3	NDUFAB1	3	144	3	1	Methyl [K151]	cell organization and biogenesis;metabolic process;transport	cytosol;membrane;mitochondrion;organelle lumen	catalytic activity;metal ion binding;protein binding;transporter activity	Oxidative phosphorylation; Metabolic pathways; Parkinson's disease; Non-alcoholic fatty liver disease (NAFLD); Alzheimer's disease; Huntington's disease	Mitochondrial Fatty Acid Beta-Oxidation; Glyoxylate metabolism and glycine degradation; Complex I biogenesis	Electron Transport Chain; Oxidative phosphorylation	1.7538 (df=5)	0.131488	0.182161	0.893875	0.975037	0.986433	0.999997	0.240736	0.999952	0.999897	0.977709	0.0672935	1	0.992457	0.116746	0.994852	0.144858	0.59059	-0.211535	-0.165407	-0.154309	0.0405698	0.756134	0.0461284	0.0572268	0.252105	0.96767	0.0110984	0.205977	0.921541	0.194878	0.910443	0.715564	[-0.7912 , 0.3681]	[-0.8099 , 0.4791]	[-0.8439 , 0.5353]
O14562	Ubiquitin domain-containing protein UBFD1 OS=Homo sapiens OX=9606 GN=UBFD1 PE=1 SV=2	UBFD1	4	80	4	1				protein binding;RNA binding				1.6936 (df=5)	0.145356	0.197774	0.864598	0.993353	0.983314	0.410335	0.950795	0.656402	0.604478	0.128269	0.652696	0.999994	0.701567	0.996764	0.774172	0.999018	0.969174	-0.309953	0.172876	0.221736	0.888354	0.410666	0.482828	0.531689	1.19831	0.720619	0.0488608	0.715478	0.237791	0.666617	0.18893	-0.477687	[-1.1057 , 0.4858]	[-0.7302 , 1.0759]	[-0.7249 , 1.1684]
O14569	Transmembrane reductase CYB561D2 OS=Homo sapiens OX=9606 GN=CYB561D2 PE=1 SV=1	CYB561D2	2	29	2	1	Met-loss+Acetyl [N-Term]	metabolic process;transport	membrane	metal ion binding				2.5565 (df=4)	0.0452279	0.0756771	0.368162	0.995817	0.718454	0.345782		0.753169	0.998837	0.0392424		0.929078	0.281061		0.0945093			-0.479188	-0.111159	-0.392928	0.840444		0.368029	0.08626	1.31963		-0.281769	0.951603		1.23337			[-1.2134 , 0.255]	[-0.9444 , 0.7221]	[-1.2664 , 0.4806]
O14576	Cytoplasmic dynein 1 intermediate chain 1 OS=Homo sapiens OX=9606 GN=DYNC1I1 PE=1 SV=2	DYNC1I1	7	103	5	1		cell organization and biogenesis;cellular component movement;regulation of biological process;transport	chromosome;cytoplasm;cytoskeleton;cytosol;endosome;nucleus	catalytic activity;motor activity;protein binding	Phagosome; Vasopressin-regulated water reabsorption; Salmonella infection	COPI-independent Golgi-to-ER retrograde traffic; Amplification of signal from unattached kinetochores via a MAD2 inhibitory signal; Separation of Sister Chromatids; Resolution of Sister Chromatid Cohesion; RHO GTPases Activate Formins; COPI-mediated anterograde transport; MHC class II antigen presentation; HSP90 chaperone cycle for steroid hormone receptors (SHR)		5.2912 (df=5)	0.00028714	0.00120556	0.999421	0.00467244	0.999947	0.998905	0.0465403	0.00259834	0.996908	0.999969	0.0307612	0.0448209	0.0956238	0.995819	0.996548	0.1107	0.118791	0.175123	-2.16289	-0.128158	0.342621	-2.64026	-2.33801	-0.303281	0.167498	-2.81538	2.03473	2.50551	-0.477364	0.470779	-2.5121	-2.98288	[-1.3493 , 1.6996]	[-3.8579 , -0.4679]	[-1.9418 , 1.6855]
O14578	Citron Rho-interacting kinase OS=Homo sapiens OX=9606 GN=CIT PE=1 SV=2	CIT	10	49	8	1		cell death;cell differentiation;cell division;cell organization and biogenesis;development;metabolic process;regulation of biological process;response to stimulus;transport	cytoplasm;cytosol;membrane	catalytic activity;metal ion binding;motor activity;nucleotide binding;protein binding;structural molecule activity;transporter activity		RHO GTPases activate CIT	G13 Signaling Pathway	1.7903 (df=5)	0.123767	0.173379	0.999046	0.5164	0.361822	0.997546	0.461936	0.754667	0.585389	0.98578	0.61565	0.999465	0.66851	0.985789	0.542719	0.998494	0.506433	0.0758279	0.392699	0.481265	-0.158389	0.635857	0.316871	0.405437	-0.234217	0.56003	0.0885662	-0.551088	0.243159	-0.639654	0.154593	0.794247	[-0.5198 , 0.6715]	[-0.2696 , 1.055]	[-0.2274 , 1.1899]
O14579	Coatomer subunit epsilon OS=Homo sapiens OX=9606 GN=COPE PE=1 SV=3	COPE	19	706	18	1	Methyl [K245]	transport	cytoplasm;cytosol;Golgi;membrane	protein binding;structural molecule activity		COPI-dependent Golgi-to-ER retrograde traffic; COPI-mediated anterograde transport		1.0455 (df=5)	0.396664	0.45582	0.934302	0.561928	0.706106	0.985024	0.998877	0.968933	0.988853	0.8356	0.999984	0.999998	0.564289	0.986031	0.641299	0.99301	0.965049	0.111111	0.21767	0.20128	-0.135045	0.0777375	0.106559	0.0901688	-0.246156	-0.033374	-0.0163902	-0.352715	-0.139933	-0.336325	-0.123543	0.212782	[-0.233 , 0.4552]	[-0.1649 , 0.6003]	[-0.2081 , 0.6107]
O14602	Eukaryotic translation initiation factor 1A, Y-chromosomal OS=Homo sapiens OX=9606 GN=EIF1AY PE=1 SV=4	EIF1AY	9	300	1	1		metabolic process		protein binding;RNA binding	RNA transport		Translation Factors	1.8479 (df=5)	0.112444	0.160411	0.999994	0.0944418	0.999998	0.980509	1	0.147948	0.999937	0.989202	0.999995	0.188559	0.927379	0.545801	0.9786	1	0.991957	0.0312859	0.685751	-0.0292617	0.281517	-0.0192667	0.654466	-0.0605475	0.250231	-0.0505525	-0.715013	-0.404235	-0.705018	0.310778	0.009995	-0.300783	[-0.6449 , 0.7075]	[-0.0661 , 1.4376]	[-0.8338 , 0.7752]
O14617-5	Isoform 5 of AP-3 complex subunit delta-1 OS=Homo sapiens OX=9606 GN=AP3D1	AP3D1	45	1539	45	1	Methyl [K370; K580]	cell organization and biogenesis;cellular component movement;metabolic process;regulation of biological process;transport	Golgi;membrane	transporter activity				1.3225 (df=5)	0.262654	0.322875	0.615612	0.999878	0.944497	1	0.797136	0.863857	0.263316	0.923432	0.999264	0.908877	0.999928	0.894748	0.995557	0.496703	0.903589	-0.167223	-0.0287531	0.113993	0.0132244	-0.232117	0.13847	0.281216	0.180448	-0.0648935	0.142746	0.0419776	-0.203364	-0.100769	-0.34611	-0.245341	[-0.4765 , 0.1421]	[-0.3726 , 0.3151]	[-0.254 , 0.482]
O14618	Copper chaperone for superoxide dismutase OS=Homo sapiens OX=9606 GN=CCS PE=1 SV=1	CCS	10	274	10	1		metabolic process;regulation of biological process;response to stimulus;transport	cytoplasm;cytosol;nucleus	antioxidant activity;catalytic activity;enzyme regulator activity;metal ion binding;protein binding	Amyotrophic lateral sclerosis (ALS)	Detoxification of Reactive Oxygen Species	Amyotrophic lateral sclerosis (ALS); Copper homeostasis	4.7542 (df=5)	0.000720035	0.00257703	0.99997	0.599215	0.650504	0.910751	0.004528	0.527061	0.766728	0.875977	0.00376872	0.0798456	1	0.119112	0.398287	0.000399784	0.302778	0.0300367	-0.29117	0.296108	-0.285352	-1.04646	-0.321206	0.266071	-0.315388	-1.0765	0.587278	0.00581785	-0.755292	-0.58146	-1.34257	-0.76111	[-0.4467 , 0.5068]	[-0.8212 , 0.2389]	[-0.271 , 0.8633]
O14639	Actin-binding LIM protein 1 OS=Homo sapiens OX=9606 GN=ABLIM1 PE=1 SV=3	ABLIM1	15	209	15	1		cell organization and biogenesis	cytoplasm;cytoskeleton	metal ion binding;protein binding	Axon guidance	DCC mediated attractive signaling		1.0968 (df=5)	0.368432	0.427621	0.523639	0.941428	0.999999	0.999998	0.533502	0.989996	0.774634	0.949043	0.982326	0.982378	0.997204	0.897578	1	0.653817	0.820474	0.389771	0.23092	0.0244047	0.0406401	0.662858	-0.158851	-0.365366	-0.349131	0.273088	-0.206515	-0.19028	0.431939	0.0162355	0.638454	0.622218	[-0.2719 , 1.0514]	[-0.5047 , 0.9666]	[-0.7627 , 0.8116]
O14641	Segment polarity protein dishevelled homolog DVL-2 OS=Homo sapiens OX=9606 GN=DVL2 PE=1 SV=1	DVL2	4	16	3	1		cell organization and biogenesis;development;metabolic process;regulation of biological process;response to stimulus	cytoplasm;cytosol;membrane;nucleus	protein binding	mTOR signaling pathway; Pathways in cancer; Signaling pathways regulating pluripotency of stem cells; Melanogenesis; Hippo signaling pathway; Notch signaling pathway; Wnt signaling pathway; HTLV-I infection; Breast cancer; Basal cell carcinoma	WNT mediated activation of DVL; Cargo recognition for clathrin-mediated endocytosis; Signaling by Hippo; Degradation of DVL; Negative regulation of TCF-dependent signaling by DVL-interacting proteins; Disassembly of the destruction complex and recruitment of AXIN to the membrane; RHO GTPases Activate Formins; Asymmetric localization of PCP proteins; WNT5A-dependent internalization of FZD4	Neural Crest Differentiation; Notch Signaling Pathway; Wnt Signaling Pathway Netpath; Regulation of Wnt/B-catenin Signaling by Small Molecule Compounds; ESC Pluripotency Pathways; Wnt Signaling in Kidney Disease; Wnt Signaling Pathway and Pluripotency; Wnt Signaling Pathway; DNA Damage Response (only ATM dependent)	0.7778 (df=5)	0.568518	0.61614	0.99998	0.999997	0.919509	0.994044	0.709725	0.999827	0.881672	0.997895	0.663847	0.967402	0.99136	0.792534	0.862888	0.983069	0.652755	-0.0431432	0.0329897	0.296019	-0.235003	0.61527	0.0761329	0.339163	-0.19186	0.658413	0.26303	-0.267993	0.58228	-0.531023	0.319251	0.850273	[-0.7846 , 0.6984]	[-0.7815 , 0.8475]	[-0.5755 , 1.1675]
O14646	Chromodomain-helicase-DNA-binding protein 1 OS=Homo sapiens OX=9606 GN=CHD1 PE=1 SV=2	CHD1	12	89	6	1		cell organization and biogenesis;metabolic process;regulation of biological process	cytoplasm;nucleus	catalytic activity;DNA binding;nucleotide binding;protein binding				0.9834 (df=5)	0.432958	0.49027	0.875561	1	0.864777	0.998444	0.601654	0.916223	0.999957	0.901389	0.935229	0.897057	0.999069	0.639492	0.876252	0.974817	0.635087	0.409661	-0.0139997	0.49853	-0.260065	1.01163	-0.42366	0.0888695	-0.669726	0.601965	0.51253	-0.246066	1.02563	-0.758596	0.513096	1.27169	[-0.6662 , 1.4855]	[-1.2102 , 1.1822]	[-0.7814 , 1.7784]
O14647	Chromodomain-helicase-DNA-binding protein 2 OS=Homo sapiens OX=9606 GN=CHD2 PE=1 SV=2	CHD2	13	127	6	1		cell differentiation;cell organization and biogenesis;metabolic process;regulation of biological process;response to stimulus	nucleus	catalytic activity;DNA binding;nucleotide binding;protein binding;RNA binding				9.1228 (df=5)	6.04388e-07	7.5777e-06	0.0338271	0.645721	0.978315	0.135236	1.99114e-07	0.841809	0.471455	0.98056	0.000362557	0.987797	0.705383	3.78014e-05	0.439964	1.04525e-05	0.0489933	-0.541154	-0.3006	-0.152376	-0.758444	-1.91006	0.240554	0.388779	-0.217289	-1.36891	0.148224	-0.457843	-1.60946	-0.606068	-1.75769	-1.15162	[-1.0565 , -0.0259]	[-0.8735 , 0.2723]	[-0.7654 , 0.4607]
O14653	Golgi SNAP receptor complex member 2 OS=Homo sapiens OX=9606 GN=GOSR2 PE=1 SV=2	GOSR2	6	155	6	1	Acetyl [N-Term]	cell organization and biogenesis;transport	cytosol;endoplasmic reticulum;Golgi;membrane	protein binding	SNARE interactions in vesicular transport	Intra-Golgi traffic; Cargo concentration in the ER; COPII (Coat Protein 2) Mediated Vesicle Transport; COPI-mediated anterograde transport; XBP1(S) activates chaperone genes		2.5464 (df=5)	0.0340414	0.0598757	0.999839	0.938644	0.913547	0.0955621	0.784125	0.98445	0.971608	0.0728478	0.865534	0.999995	0.0311232	0.985238	0.0302235	0.993536	0.0355719	-0.0732016	-0.292349	-0.340917	1.29354	-0.633279	-0.219147	-0.267716	1.36675	-0.560078	-0.0485683	1.58589	-0.340931	1.63446	-0.292362	-1.92682	[-0.9014 , 0.755]	[-1.2131 , 0.6284]	[-1.3262 , 0.6443]
O14656	Torsin-1A OS=Homo sapiens OX=9606 GN=TOR1A PE=1 SV=1	TOR1A	9	123	9	1		cell organization and biogenesis;cellular component movement;metabolic process;regulation of biological process;response to stimulus;transport	cytoplasm;cytoskeleton;cytosol;endoplasmic reticulum;membrane;nucleus;organelle lumen	catalytic activity;nucleotide binding;protein binding		Cargo recognition for clathrin-mediated endocytosis		3.937 (df=5)	0.00297687	0.0082281	0.352505	0.283255	1	0.25731	0.763845	0.999529	0.61295	0.0172249	0.145877	0.503564	0.0134925	0.113656	0.322088	0.799791	0.986632	-0.477079	-0.565096	-0.0152375	0.894054	0.547699	-0.088017	0.461842	1.37113	1.02478	0.549859	1.45915	1.1128	0.909291	0.562936	-0.346355	[-1.1738 , 0.2196]	[-1.3397 , 0.2096]	[-0.8441 , 0.8136]
O14657	Torsin-1B OS=Homo sapiens OX=9606 GN=TOR1B PE=1 SV=2	TOR1B	6	62	6	1		cell organization and biogenesis;metabolic process;response to stimulus	cytoplasm;endoplasmic reticulum;membrane;nucleus;organelle lumen	catalytic activity;nucleotide binding;protein binding		Cargo recognition for clathrin-mediated endocytosis		6.1193 (df=5)	7.13144e-05	0.000386326	0.979315	0.953162	0.321833	0.984228	0.000106668	0.686575	0.112662	0.888542	2.71199e-05	0.870239	0.999998	0.00179198	0.982283	0.0301128	0.0258345	0.246617	-0.331563	-0.839835	-0.39815	-2.81998	-0.57818	-1.08645	-0.644768	-3.0666	-0.508272	-0.0665872	-2.48842	0.441685	-1.98014	-2.42183	[-0.7563 , 1.2495]	[-1.4466 , 0.7835]	[-2.033 , 0.3533]
O14662-2	Isoform A of Syntaxin-16 OS=Homo sapiens OX=9606 GN=STX16	STX16	9	140	9	1		cell organization and biogenesis;transport	cytoplasm;cytosol;Golgi;membrane	protein binding			Ectoderm Differentiation	7.3004 (df=5)	1.03558e-05	7.94601e-05	0.637286	0.961843	0.608915	0.264622	0.000550895	0.274317	0.99975	0.810855	2.2873e-05	0.280617	0.117099	0.0065479	0.921222	3.93885e-05	4.35732e-05	-0.224323	0.133488	-0.274464	-0.540134	1.08268	0.357811	-0.0501415	-0.315811	1.307	-0.407952	-0.673622	0.94919	-0.26567	1.35714	1.62281	[-0.6482 , 0.1996]	[-0.3379 , 0.6048]	[-0.7788 , 0.2299]
O14672	Disintegrin and metalloproteinase domain-containing protein 10 OS=Homo sapiens OX=9606 GN=ADAM10 PE=1 SV=1	ADAM10	14	457	14	1		cell communication;cell organization and biogenesis;metabolic process;regulation of biological process;response to stimulus;transport	cell surface;cytoplasm;Golgi;membrane;nucleus;organelle lumen	catalytic activity;metal ion binding;protein binding	Epithelial cell signaling in Helicobacter pylori infection; Alzheimer's disease	Collagen degradation; Post-translational protein phosphorylation; Activated NOTCH1 Transmits Signal to the Nucleus; Regulation of Insulin-like Growth Factor (IGF) transport and uptake by Insulin-like Growth Factor Binding Proteins (IGFBPs); Constitutive Signaling by NOTCH1 t(7;9)(NOTCH1:M1580_K2555) Translocation Mutant; Signaling by NOTCH4; Constitutive Signaling by NOTCH1 HD+PEST Domain Mutants…	Alzheimers Disease; Copper homeostasis; Canonical and Non-canonical Notch signaling; Hypertrophy Model	3.718 (df=5)	0.00436747	0.0112493	0.628835	0.495997	0.972954	0.0873268	0.0705846	0.999284	0.342774	0.495195	0.440588	0.259223	0.680828	0.627806	0.0422264	0.0339301	1	-0.233397	-0.293604	0.136017	-0.692921	-0.715461	-0.0602075	0.369414	-0.459524	-0.482064	0.429621	-0.399317	-0.421857	-0.828938	-0.851478	-0.02254	[-0.6707 , 0.204]	[-0.7799 , 0.1927]	[-0.3843 , 0.6563]
O14681	Etoposide-induced protein 2.4 homolog OS=Homo sapiens OX=9606 GN=EI24 PE=1 SV=4	EI24	4	134	4	1		cell communication;cell death;metabolic process;regulation of biological process;response to stimulus	cytoplasm;cytosol;endoplasmic reticulum;Golgi;membrane;nucleus		p53 signaling pathway			3.8193 (df=5)	0.00365747	0.0097368	0.0259162	0.90368	0.711374	0.966778	0.62009	0.504593	0.837214	0.107224	0.0142125	0.998427	0.727365	0.2816	0.565293	0.17984	0.991232	-0.729449	-0.266445	-0.391593	0.316826	0.622068	0.463004	0.337856	1.04628	1.35152	-0.125148	0.583271	0.888513	0.708419	1.01366	0.305242	[-1.403 , -0.0559]	[-1.0153 , 0.4824]	[-1.1929 , 0.4097]
O14683	Tumor protein p53-inducible protein 11 OS=Homo sapiens OX=9606 GN=TP53I11 PE=1 SV=2	TP53I11	3	100	3	1		regulation of biological process;response to stimulus	membrane					2.893 (df=5)	0.0185809	0.0364965	0.725498	0.947695	0.99191	0.699082	0.00594145	0.999191	0.992116	0.989254	0.0685685	0.999917	0.962017	0.0498935	0.928018	0.0400562	0.538715	-0.407658	-0.287937	-0.201599	-0.721142	-1.81964	0.11972	0.206059	-0.313484	-1.41198	0.0863384	-0.433205	-1.5317	-0.519543	-1.61804	-1.0985	[-1.2557 , 0.4404]	[-1.2309 , 0.655]	[-1.2105 , 0.8073]
O14684	Prostaglandin E synthase OS=Homo sapiens OX=9606 GN=PTGES PE=1 SV=2	PTGES	3	170	3	1		defense response;metabolic process;regulation of biological process;response to stimulus	cytoplasm;membrane	catalytic activity	Metabolic pathways; Arachidonic acid metabolism	Synthesis of Prostaglandins (PG) and Thromboxanes (TX)	Eicosanoid Synthesis	4.1256 (df=5)	0.00214143	0.00628054	0.795185	0.75443	0.826204	0.999125	0.0214724	0.999959	0.234166	0.881717	0.00243865	0.228523	0.845186	0.00261041	0.997731	0.247916	0.247827	0.241013	0.283346	-0.273219	-0.117879	-1.04239	0.042333	-0.514232	-0.358893	-1.28341	-0.556565	-0.401226	-1.32574	0.155339	-0.769173	-0.924512	[-0.3084 , 0.7905]	[-0.3276 , 0.8943]	[-0.9269 , 0.3805]
O14727	Apoptotic protease-activating factor 1 OS=Homo sapiens OX=9606 GN=APAF1 PE=1 SV=2	APAF1	12	78	12	1		cell death;cell differentiation;cell organization and biogenesis;development;metabolic process;regulation of biological process;response to stimulus;transport	cytoplasm;cytosol;extracellular;nucleus;organelle lumen	enzyme regulator activity;nucleotide binding;protein binding	p53 signaling pathway; Apoptosis - multiple species; Amyotrophic lateral sclerosis (ALS); Parkinson's disease; Hepatitis B; Tuberculosis; Legionellosis; Huntington's disease; Small cell lung cancer; Alzheimer's disease; Apoptosis; Platinum drug resistance	Neutrophil degranulation; TP53 Regulates Transcription of Caspase Activators and Caspases; Transcriptional Regulation by E2F6; Activation of caspases through apoptosome-mediated cleavage; Formation of apoptosome	miRNA Regulation of DNA Damage Response; Alzheimers Disease; TNF alpha Signaling Pathway; Parkinsons Disease Pathway; Amyotrophic lateral sclerosis (ALS); Nanomaterial induced apoptosis; Apoptosis; Fas Ligand (FasL) pathway and Stress induction of Heat Shock Proteins (HSP) regulation; Apoptosis Modulation by HSP70; Oxidative Damage; DNA Damage Response	4.3291 (df=5)	0.00150267	0.00469793	0.569126	0.996701	1	0.95056	0.00130061	0.407448	0.732194	0.999999	0.0307219	0.999103	0.866907	0.000939673	0.958803	0.00336172	0.141785	-0.332555	0.107909	0.0105732	-0.304145	-1.41946	0.440465	0.343129	0.0284107	-1.0869	-0.097336	-0.412054	-1.52737	-0.314718	-1.43003	-1.11531	[-0.921 , 0.2559]	[-0.5464 , 0.7622]	[-0.6895 , 0.7106]
O14732	Inositol monophosphatase 2 OS=Homo sapiens OX=9606 GN=IMPA2 PE=1 SV=1	IMPA2	8	469	7	1		metabolic process;regulation of biological process;response to stimulus	cytoplasm;cytosol	catalytic activity;metal ion binding;protein binding	Metabolic pathways; Phosphatidylinositol signaling system; Inositol phosphate metabolism	Synthesis of IP2, IP, and Ins in the cytosol		8.8672 (df=5)	8.91433e-07	1.05597e-05	0.999877	0.980733	0.999943	0.999998	4.67969e-07	0.997006	1	1	3.62686e-07	0.998511	0.999395	2.65599e-07	1	1.85054e-06	0.000107929	-0.0415396	-0.133558	-0.0423675	-0.0296911	1.78225	-0.0920183	-0.000827943	0.0118485	1.82379	0.0911904	0.103867	1.91581	0.0126764	1.82462	1.81194	[-0.5379 , 0.4548]	[-0.6854 , 0.4183]	[-0.6329 , 0.5482]
O14733	Dual specificity mitogen-activated protein kinase kinase 7 OS=Homo sapiens OX=9606 GN=MAP2K7 PE=1 SV=2	MAP2K7	2	13	1	1		cell death;metabolic process;regulation of biological process;response to stimulus	cytoplasm;cytosol;nucleus	catalytic activity;metal ion binding;nucleotide binding;protein binding	ErbB signaling pathway; Osteoclast differentiation; Fc epsilon RI signaling pathway; Neurotrophin signaling pathway; T cell receptor signaling pathway; Influenza A; Protein processing in endoplasmic reticulum; MAPK signaling pathway; Epstein-Barr virus infection; GnRH signaling pathway; TNF signaling pathway; Toll-like receptor signaling pathway	Uptake and function of anthrax toxins; FCERI mediated MAPK activation; Activated TLR4 signalling; JNK (c-Jun kinases) phosphorylation and activation mediated by activated human TAK1; Oxidative Stress Induced Senescence	Regulation of toll-like receptor signaling pathway; MicroRNAs in cardiomyocyte hypertrophy; IL-1 signaling pathway; RANKL/RANK (Receptor activator of NFKB (ligand)) Signaling Pathway; Signaling Pathways in Glioblastoma; TNF alpha Signaling Pathway; Structural Pathway of Interleukin 1 (IL-1); Cardiac Hypertrophic Response; MAPK Signaling Pathway; ERK Pathway in Huntington's Disease; T-Cell antigen…
O14734	Acyl-coenzyme A thioesterase 8 OS=Homo sapiens OX=9606 GN=ACOT8 PE=1 SV=1	ACOT8	7	107	6	1		cell organization and biogenesis;metabolic process;regulation of biological process	cytoplasm;mitochondrion;organelle lumen	catalytic activity;protein binding	Metabolic pathways; Primary bile acid biosynthesis; Peroxisome	Beta-oxidation of pristanoyl-CoA; Synthesis of bile acids and bile salts via 7alpha-hydroxycholesterol; alpha-linolenic acid (ALA) metabolism; Beta-oxidation of very long chain fatty acids		1.866 (df=5)	0.109097	0.156248	0.51118	0.999692	0.99997	0.247538	0.999992	0.471329	0.601194	0.847769	0.864569	0.999999	0.21618	1	0.269708	1	0.46945	-0.330652	0.0622903	0.0415044	-0.71918	0.0454747	0.392942	0.372156	-0.388528	0.376126	-0.020786	-0.78147	-0.0168156	-0.760684	0.00397038	0.764655	[-0.8857 , 0.2244]	[-0.5549 , 0.6794]	[-0.6189 , 0.7019]
O14735	CDP-diacylglycerol--inositol 3-phosphatidyltransferase OS=Homo sapiens OX=9606 GN=CDIPT PE=1 SV=1	CDIPT	7	267	7	1		metabolic process	endoplasmic reticulum;Golgi;membrane	catalytic activity;metal ion binding;protein binding	Glycerophospholipid metabolism; Inositol phosphate metabolism; Metabolic pathways; Phosphatidylinositol signaling system	Synthesis of PI		2.0306 (df=5)	0.0826811	0.124422	0.979961	0.524099	0.999986	0.412956	0.960493	0.211637	0.976783	0.214559	0.99842	0.779609	0.975979	0.440412	0.567643	0.952079	0.297743	-0.105667	0.283361	0.0279355	0.482168	-0.21204	0.389027	0.133602	0.587835	-0.106373	-0.255425	0.198808	-0.4954	0.454233	-0.239975	-0.694208	[-0.5385 , 0.3271]	[-0.1978 , 0.7646]	[-0.487 , 0.5428]
O14737	Programmed cell death protein 5 OS=Homo sapiens OX=9606 GN=PDCD5 PE=1 SV=3	PDCD5	9	654	9	1	Met-loss+Acetyl [N-Term]; Methyl [K97]	cell death;regulation of biological process;response to stimulus	cytoplasm;cytosol;nucleus	DNA binding;enzyme regulator activity;protein binding				2.5719 (df=5)	0.0325603	0.0577943	0.896195	0.884347	0.391952	0.997935	0.578321	0.999994	0.0776432	0.999974	0.239146	0.0935874	0.999844	0.238028	0.574097	0.999781	0.60478	-0.18582	-0.212608	0.402948	-0.131343	0.492368	-0.0267881	0.588768	0.0544771	0.678188	0.615556	0.0812652	0.704976	-0.534291	0.0894195	0.623711	[-0.698 , 0.3263]	[-0.782 , 0.3568]	[-0.2063 , 1.0122]
O14744	Protein arginine N-methyltransferase 5 OS=Homo sapiens OX=9606 GN=PRMT5 PE=1 SV=4	PRMT5	25	982	25	1	Met-loss+Acetyl [N-Term]	cell organization and biogenesis;cell proliferation;metabolic process;regulation of biological process	cytoplasm;cytosol;Golgi;nucleus	catalytic activity;DNA binding;nucleotide binding;protein binding	RNA transport	snRNP Assembly; Regulation of TP53 Activity through Methylation; RMTs methylate histone arginines		2.1938 (df=5)	0.0625914	0.0985604	0.926708	0.993601	0.998166	0.292587	0.54486	0.738284	0.998964	0.0995727	0.239762	0.956388	0.559541	0.805125	0.237779	0.450834	0.999493	-0.131027	0.0833921	-0.0684973	0.489912	0.391532	0.214419	0.0625295	0.620939	0.522558	-0.151889	0.40652	0.30814	0.558409	0.460029	-0.0983804	[-0.5259 , 0.2638]	[-0.3556 , 0.5224]	[-0.5383 , 0.4013]
O14745	Na(+)/H(+) exchange regulatory cofactor NHE-RF1 OS=Homo sapiens OX=9606 GN=SLC9A3R1 PE=1 SV=4	SLC9A3R1	22	895	22	1	Methyl [K101]; Met-loss+Acetyl [N-Term]	cell differentiation;cell organization and biogenesis;cellular homeostasis;regulation of biological process;response to stimulus;transport	cytoplasm;cytoskeleton;membrane;nucleus	protein binding;structural molecule activity				3.78 (df=5)	0.00391826	0.0102958	0.293795	0.946983	0.626102	0.0923393	0.982554	0.925972	0.999949	0.0031072	0.413729	0.986113	0.0316552	0.832535	0.010323	0.574678	0.649859	0.231192	0.109031	0.20377	-0.502693	-0.129972	-0.122161	-0.0274226	-0.733886	-0.361164	0.0947384	-0.611725	-0.239003	-0.706463	-0.333742	0.372721	[-0.0889 , 0.5513]	[-0.2469 , 0.4649]	[-0.177 , 0.5846]
O14772	Fucose-1-phosphate guanylyltransferase OS=Homo sapiens OX=9606 GN=FPGT PE=1 SV=3		4	31	2	1								3.7562 (df=1)	0.0716703	0.110333												0.0716703															-2.04879
O14773	Tripeptidyl-peptidase 1 OS=Homo sapiens OX=9606 GN=TPP1 PE=1 SV=2	TPP1	18	2307	18	1		cell differentiation;cell organization and biogenesis;metabolic process	mitochondrion;organelle lumen;vacuole	catalytic activity;metal ion binding;protein binding	Lysosome	XBP1(S) activates chaperone genes		2.2693 (df=5)	0.0549843	0.0884915	0.999843	0.114901	0.998384	0.912053	0.929919	0.0819971	0.989805	0.956399	0.883177	0.470241	0.121875	0.984075	0.833811	0.989274	0.654154	-0.0487915	0.544207	0.0936572	-0.330569	0.312106	0.592998	0.142449	-0.281778	0.360897	-0.45055	-0.874776	-0.232101	-0.424227	0.218448	0.642675	[-0.6031 , 0.5056]	[-0.0722 , 1.1606]	[-0.5659 , 0.7532]
O14776	Transcription elongation regulator 1 OS=Homo sapiens OX=9606 GN=TCERG1 PE=1 SV=2	TCERG1	31	1022	30	1		metabolic process;regulation of biological process	nucleus	protein binding;RNA binding	Spliceosome			4.2232 (df=5)	0.00180674	0.00544176	0.882082	0.112674	0.981764	0.876533	0.104589	0.633066	0.617913	0.997219	0.0223507	0.0650789	0.994421	0.00141022	0.682248	0.366031	0.0568006	0.203996	0.535381	-0.154563	0.354376	-0.836584	0.331384	-0.35856	0.150379	-1.04058	-0.689944	-0.181005	-1.37196	0.508939	-0.682021	-1.19096	[-0.3395 , 0.7475]	[-0.069 , 1.1397]	[-0.8012 , 0.4921]
O14777	Kinetochore protein NDC80 homolog OS=Homo sapiens OX=9606 GN=NDC80 PE=1 SV=1	NDC80	4	22	4	1		cell division;cell organization and biogenesis;metabolic process;regulation of biological process;transport	chromosome;cytosol;membrane;nucleus	protein binding;structural molecule activity;transporter activity		Amplification of signal from unattached kinetochores via a MAD2 inhibitory signal; Separation of Sister Chromatids; Resolution of Sister Chromatid Cohesion; RHO GTPases Activate Formins		3.5714 (df=5)	0.00568389	0.0138899	1	0.213293	0.998703	0.151963	0.778332	0.208093	0.999507	0.175785	0.809353	0.205192	0.00430942	0.0937529	0.341796	0.928847	0.950546	-0.0295664	0.977621	-0.181224	-1.61233	-0.862952	1.00719	-0.151658	-1.58276	-0.833385	-1.15885	-2.58995	-1.84057	-1.4311	-0.681727	0.749375	[-1.1558 , 1.0967]	[-0.2725 , 2.2278]	[-1.5177 , 1.1552]
O14786	Neuropilin-1 OS=Homo sapiens OX=9606 GN=NRP1 PE=1 SV=3	NRP1	10	284	9	1		cell communication;cell differentiation;cell growth;cell organization and biogenesis;cellular component movement;development;regulation of biological process;response to stimulus;transport	cell surface;cytosol;endosome;extracellular;membrane	catalytic activity;enzyme regulator activity;metal ion binding;protein binding;receptor activity;signal transducer activity	Axon guidance; HTLV-I infection	CHL1 interactions; SEMA3A-Plexin repulsion signaling by inhibiting Integrin adhesion; Sema3A PAK dependent Axon repulsion; Signal transduction by L1; Signaling by ROBO receptors; CRMPs in Sema3A signaling; Neurophilin interactions with VEGF and VEGFR		1.8916 (df=5)	0.104523	0.150643	0.439674	0.999986	0.539795	0.770532	1	0.690224	0.999994	0.178457	0.884234	0.728133	0.752744	0.999996	0.200953	0.875822	0.916661	0.302178	0.0286481	0.329021	-0.371147	-0.00718868	-0.27353	0.0268428	-0.673325	-0.309367	0.300373	-0.399795	-0.0358368	-0.700168	-0.33621	0.363958	[-0.1742 , 0.7785]	[-0.501 , 0.5583]	[-0.2377 , 0.8957]
O14787-2	Isoform 2 of Transportin-2 OS=Homo sapiens OX=9606 GN=TNPO2	TNPO2	26	1160	15	1	Acetyl [N-Term]; Methyl [K18; K693]	transport	cytoplasm;membrane;nucleus	protein binding;transporter activity				6.117 (df=5)	7.15901e-05	0.000387532	0.999835	0.992874	0.799181	0.679172	9.45441e-05	0.970903	0.696709	0.779231	6.79707e-05	0.98465	0.501049	0.000844778	0.256601	0.00617474	8.42231e-05	-0.0849118	0.206553	0.495758	-0.830585	2.70461	0.291465	0.58067	-0.745673	2.78952	0.289205	-1.03714	2.49805	-1.32634	2.20885	3.53519	[-1.0405 , 0.8707]	[-0.8559 , 1.269]	[-0.6411 , 1.6326]
O14791	Apolipoprotein L1 OS=Homo sapiens OX=9606 GN=APOL1 PE=1 SV=5	APOL1	18	272	17	1		defense response;metabolic process;response to stimulus;transport	extracellular;organelle lumen	protein binding;transporter activity	African trypanosomiasis	Post-translational protein phosphorylation; Regulation of Insulin-like Growth Factor (IGF) transport and uptake by Insulin-like Growth Factor Binding Proteins (IGFBPs); Scavenging of heme from plasma		2.6754 (df=5)	0.0271885	0.0495491	0.304043	0.531949	0.371309	0.759041	0.370152	0.999982	0.999949	0.128039	0.976259	0.999422	0.194527	0.963342	0.134583	0.993325	0.121939	0.395533	0.359409	0.442932	-0.43734	0.639458	-0.0361237	0.0473993	-0.832874	0.243925	0.083523	-0.79675	0.280049	-0.880273	0.196526	1.0768	[-0.1573 , 0.9484]	[-0.2553 , 0.9741]	[-0.2148 , 1.1006]
O14795	Protein unc-13 homolog B OS=Homo sapiens OX=9606 GN=UNC13B PE=1 SV=2	UNC13B	2	12	2	1		cell communication;cell organization and biogenesis;cellular homeostasis;regulation of biological process;response to stimulus;transport	cytoplasm;cytosol;Golgi;membrane	metal ion binding;protein binding	Synaptic vesicle cycle	Norepinephrine Neurotransmitter Release Cycle; Glutamate Neurotransmitter Release Cycle; Acetylcholine Neurotransmitter Release Cycle; Serotonin Neurotransmitter Release Cycle; Dopamine Neurotransmitter Release Cycle	Synaptic Vesicle Pathway; Monoamine Transport	2.0725 (df=5)	0.0772771	0.1176	0.959484	0.937535	0.932265	0.992245	0.151527	0.588578	0.999891	0.913327	0.388076	0.577473	1	0.0538045	0.879392	0.562807	0.231327	0.678071	-0.854345	0.913741	-0.882415	3.40289	-1.53242	0.235669	-1.56049	2.72482	1.76809	-0.0280702	4.25724	-1.79616	2.48915	4.28531	[-1.6842 , 3.0403]	[-3.5353 , 1.8266]	[-1.8966 , 3.7241]
O14802	DNA-directed RNA polymerase III subunit RPC1 OS=Homo sapiens OX=9606 GN=POLR3A PE=1 SV=2	POLR3A	9	62	8	1		defense response;metabolic process;regulation of biological process;response to stimulus	cytosol;membrane;nucleus	catalytic activity;DNA binding;metal ion binding	Metabolic pathways; Cytosolic DNA-sensing pathway; Epstein-Barr virus infection; Pyrimidine metabolism; RNA polymerase; Purine metabolism	RNA Polymerase III Abortive And Retractive Initiation; RNA Polymerase III Transcription Termination; RNA Polymerase III Transcription Initiation From Type 1 Promoter; RNA Polymerase III Transcription Initiation From Type 3 Promoter; Cytosolic sensors of pathogen-associated DNA ; RNA Polymerase III Chain Elongation; RNA Polymerase III Transcription Initiation From Type 2 Promoter		0.9466 (df=5)	0.455515	0.510269	0.999994	0.996714	0.671623	0.759514	0.990891	0.999265	0.760493	0.810175	0.985215	0.934664	0.922643	0.953839	0.999724	0.659423	0.668228	-0.0317192	-0.129655	-0.429907	-0.559417	0.248923	-0.0979363	-0.398188	-0.527698	0.280642	-0.300252	-0.429761	0.378578	-0.12951	0.67883	0.80834	[-0.7393 , 0.6759]	[-0.9164 , 0.6571]	[-1.2717 , 0.4119]
O14807	Ras-related protein M-Ras OS=Homo sapiens OX=9606 GN=MRAS PE=1 SV=2	MRAS	2	11	2	1		cell organization and biogenesis;development;regulation of biological process;response to stimulus	membrane	catalytic activity;nucleotide binding;protein binding	Proteoglycans in cancer; Rap1 signaling pathway; Regulation of actin cytoskeleton; MAPK signaling pathway; Tight junction; Ras signaling pathway; HTLV-I infection; Phospholipase D signaling pathway		MAPK Signaling Pathway; Regulation of Actin Cytoskeleton	1.3028 (df=4)	0.276731	0.337789	0.80032	0.690551	0.998399	0.999979		0.170491	0.967281	0.957203		0.640194	0.965748		0.998878			0.567853	-0.729135	0.174028	-0.0917572		-1.29699	-0.393825	-0.65961		0.903162	0.637378		-0.265785			[-0.861 , 1.9967]	[-2.294 , 0.8358]	[-1.4973 , 1.8454]
O14817	Tetraspanin-4 OS=Homo sapiens OX=9606 GN=TSPAN4 PE=1 SV=1	TSPAN4	2	33	2	1		cell organization and biogenesis;regulation of biological process;response to stimulus	membrane	protein binding				3.8688 (df=5)	0.0033537	0.00908853	0.0113045	0.696384	0.996259	0.996964	0.163055	0.604146	0.0175237	0.65696	0.998579	0.553899	0.997756	0.725761	0.974198	0.121403	0.668299	1.35194	0.633266	-0.230888	0.318613	1.62742	-0.718679	-1.58283	-1.03333	0.275476	-0.864154	-0.314652	0.994155	0.549502	1.85831	1.30881	[0.2062 , 2.4977]	[-0.6407 , 1.9072]	[-1.594 , 1.1322]
O14818	Proteasome subunit alpha type-7 OS=Homo sapiens OX=9606 GN=PSMA7 PE=1 SV=1	PSMA7	22	2070	15	1	Methyl [K27; K47; K52; K61; K157; K174; K189; K204; K227; K234]	metabolic process;regulation of biological process;response to stimulus;transport	cytoplasm;cytosol;nucleus;proteasome	catalytic activity;nucleotide binding;protein binding	Proteasome	Regulation of RAS by GAPs; CDT1 association with the CDC6:ORC:origin complex; Downstream TCR signaling; UCH proteinases; NIK-->noncanonical NF-kB signaling; Hh mutants that don't undergo autocatalytic processing are degraded by ERAD; SCF-beta-TrCP mediated degradation of Emi1; Cross-presentation of soluble exogenous antigens (endosomes); Separation of Sister Chromatids; Vpu mediated degradation o…	Proteasome Degradation	2.2384 (df=5)	0.0579879	0.0924486	0.999997	0.995788	0.0554061	0.999967	0.849912	0.991173	0.0528194	0.999997	0.824909	0.261277	0.9964	0.96685	0.340403	0.972765	0.901284	-0.0201378	0.0960403	0.583566	-0.0548158	0.342091	0.116178	0.603704	-0.034678	0.362228	0.487526	-0.150856	0.24605	-0.638382	-0.241475	0.396907	[-0.5174 , 0.4772]	[-0.4569 , 0.649]	[-0.0081 , 1.1752]
O14828	Secretory carrier-associated membrane protein 3 OS=Homo sapiens OX=9606 GN=SCAMP3 PE=1 SV=3	SCAMP3	13	713	13	1	Met-loss+Acetyl [N-Term]	transport	membrane	protein binding				2.3357 (df=5)	0.0490439	0.0809485	0.999998	0.0663188	0.680419	0.999203	0.976536	0.0659501	0.653012	0.999692	0.969004	0.904007	0.313971	0.907654	0.796178	0.999821	0.958299	-0.0212408	0.650176	0.365833	-0.127927	0.263914	0.671417	0.387074	-0.106686	0.285154	-0.284343	-0.778103	-0.386262	-0.49376	-0.101919	0.391841	[-0.6291 , 0.5866]	[-0.0257 , 1.326]	[-0.3573 , 1.089]
O14841	5-oxoprolinase OS=Homo sapiens OX=9606 GN=OPLAH PE=1 SV=3	OPLAH	21	283	21	1		metabolic process	cytosol	catalytic activity;nucleotide binding	Glutathione metabolism	Defective OPLAH causes 5-oxoprolinase deficiency (OPLAHD); Glutathione synthesis and recycling	Glutathione metabolism	24.4437 (df=5)	4.78908e-15	1.58845e-12	0.939436	0.988182	0.127539	0.999518	1.10099e-10	0.999963	0.532083	0.999938	1.10124e-10	0.50234	0.999999	1.10145e-10	0.77097	1.39033e-10	2.17738e-10	-0.158877	-0.121152	-0.517777	-0.0952635	-3.15518	0.0377244	-0.3589	0.0636131	-2.99631	-0.396624	0.0258887	-3.03403	0.422513	-2.63741	-3.05992	[-0.6609 , 0.3431]	[-0.6793 , 0.437]	[-1.115 , 0.0795]
O14867	Transcription regulator protein BACH1 OS=Homo sapiens OX=9606 GN=BACH1 PE=1 SV=2	BACH1	2	10	2	1		metabolic process;regulation of biological process;response to stimulus	cytoplasm;cytosol;nucleus	catalytic activity;DNA binding;protein binding			Integrated Cancer pathway	0.9719 (df=5)	0.439995	0.496585	0.997022	0.975381	0.383043	0.994989	0.999242	0.999634	0.671524	0.968548	1	0.868539	0.929335	0.999996	0.51376	0.940335	0.983975	0.170403	0.296708	0.827247	-0.322579	0.217272	0.126305	0.656844	-0.492982	0.0468691	0.530538	-0.619287	-0.0794363	-1.14983	-0.609975	0.539851	[-0.8858 , 1.2266]	[-0.8635 , 1.4569]	[-0.4141 , 2.0686]
O14874	[3-methyl-2-oxobutanoate dehydrogenase [lipoamide]] kinase, mitochondrial OS=Homo sapiens OX=9606 GN=BCKDK PE=1 SV=2	BCKDK	7	177	7	1		metabolic process	mitochondrion;organelle lumen	catalytic activity;nucleotide binding;protein binding		Branched-chain amino acid catabolism		3.3382 (df=5)	0.00850623	0.0193364	0.564819	0.911406	1	0.960994	0.00775444	0.99738	0.796834	0.489642	0.117794	0.96906	0.718052	0.0741695	0.963203	0.0202126	0.013525	-0.579597	-0.395466	-0.0329929	0.498953	-2.14125	0.184131	0.546604	1.07855	-1.56166	0.362473	0.894419	-1.74579	0.531946	-2.10826	-2.64021	[-1.6011 , 0.4419]	[-1.5312 , 0.7403]	[-1.2482 , 1.1823]
O14879	Interferon-induced protein with tetratricopeptide repeats 3 OS=Homo sapiens OX=9606 GN=IFIT3 PE=1 SV=1	IFIT3	17	337	16	1		defense response;regulation of biological process;response to stimulus	cytoplasm;cytosol;mitochondrion	protein binding		Interferon alpha/beta signaling		1.1456 (df=5)	0.34309	0.403015	0.999843	0.831965	0.999609	0.611133	0.998385	0.730466	0.999999	0.717548	0.999829	0.784251	0.22707	0.864366	0.801737	0.999969	0.945281	0.0298702	-0.156289	0.042823	0.316397	0.0827305	-0.18616	0.0129528	0.286526	0.0528604	0.199112	0.472686	0.23902	0.273574	0.0399076	-0.233666	[-0.3097 , 0.3694]	[-0.5338 , 0.2213]	[-0.3612 , 0.4468]
O14880	Microsomal glutathione S-transferase 3 OS=Homo sapiens OX=9606 GN=MGST3 PE=1 SV=1	MGST3	8	463	8	1	Methyl [K111; K149]	metabolic process;response to stimulus	endoplasmic reticulum;membrane	antioxidant activity;catalytic activity;protein binding	Platinum drug resistance; Metabolism of xenobiotics by cytochrome P450; Drug metabolism - cytochrome P450; Chemical carcinogenesis; Glutathione metabolism	Glutathione conjugation; Aflatoxin activation and detoxification	NRF2 pathway; Metapathway biotransformation	5.115 (df=5)	0.000387725	0.00154493	0.0508781	0.0421126	0.750469	0.979506	0.000374605	0.999249	0.896713	0.926907	0.0830475	0.789353	0.855958	0.171749	0.999942	0.0204503	0.0560864	-0.674298	-0.768254	-0.374824	-0.284568	-1.76799	-0.0939555	0.299474	0.38973	-1.0937	0.39343	0.483686	-0.99974	0.090256	-1.39317	-1.48343	[-1.3501 , 0.0016]	[-1.5197 , -0.0168]	[-1.1789 , 0.4292]
O14896	Interferon regulatory factor 6 OS=Homo sapiens OX=9606 GN=IRF6 PE=1 SV=1	IRF6	4	27	4	1		cell differentiation;cell proliferation;metabolic process;regulation of biological process;response to stimulus	cytoplasm;cytosol;nucleus	DNA binding;protein binding		Interferon alpha/beta signaling; Interferon gamma signaling	Apoptosis; Primary Focal Segmental Glomerulosclerosis FSGS; Hypothetical Craniofacial Development Pathway	1.4347 (df=5)	0.220554	0.278002	1	0.838718	0.33544	0.99999	0.970494	0.874081	0.387097	0.999978	0.967517	0.955478	0.951736	0.681395	0.69295	0.332561	0.996521	-0.0158304	-0.43289	-0.809099	0.081699	0.435465	-0.41706	-0.793268	0.0975294	0.451295	-0.376209	0.514589	0.868355	0.890798	1.24456	0.353766	[-0.9677 , 0.9361]	[-1.4913 , 0.6255]	[-1.973 , 0.3548]
O14907	Tax1-binding protein 3 OS=Homo sapiens OX=9606 GN=TAX1BP3 PE=1 SV=2	TAX1BP3	5	238	4	1	Met-loss+Acetyl [N-Term]; Methyl [K76]	regulation of biological process;response to stimulus	cytoplasm;cytoskeleton;cytosol;membrane;nucleus	protein binding		RHO GTPases Activate Rhotekin and Rhophilins		4.703 (df=5)	0.000786526	0.00276325	0.841076	0.999652	0.816542	0.930754	0.00313107	0.975804	0.259559	0.999838	0.000336877	0.741723	0.97885	0.00318668	0.550283	0.0740506	0.0051275	-0.16273	-0.0459596	0.201753	-0.224198	0.903036	0.11677	0.364483	-0.0614683	1.06577	0.247713	-0.178238	0.948995	-0.425951	0.701282	1.12723	[-0.5621 , 0.2367]	[-0.49 , 0.3981]	[-0.2734 , 0.6769]
O14908	PDZ domain-containing protein GIPC1 OS=Homo sapiens OX=9606 GN=GIPC1 PE=1 SV=2	GIPC1	14	291	13	1		cell communication;cellular component movement;regulation of biological process;response to stimulus;transport	cytoplasm;cytosol;membrane	protein binding			VEGFA-VEGFR2 Signaling Pathway	9.8754 (df=5)	1.96037e-07	2.95734e-06	0.0602225	0.860747	0.919952	0.0795687	5.48718e-06	0.744916	0.748455	0.000571925	0.00347414	1	0.0172017	0.000263724	0.0256653	0.000339692	1.58562e-07	-0.477517	-0.213789	-0.197663	0.786968	-1.59046	0.263728	0.279854	1.26449	-1.11294	0.016126	1.00076	-1.37667	0.984632	-1.3928	-2.37743	[-0.9672 , 0.0122]	[-0.7582 , 0.3307]	[-0.7802 , 0.3849]
O14920	Inhibitor of nuclear factor kappa-B kinase subunit beta OS=Homo sapiens OX=9606 GN=IKBKB PE=1 SV=1	IKBKB	24	402	22	1	Methyl [K310]	cell organization and biogenesis;defense response;metabolic process;regulation of biological process;response to stimulus	cytoplasm;cytosol;membrane;nucleus	catalytic activity;nucleotide binding;protein binding	Pancreatic cancer; Apoptosis; Shigellosis; NOD-like receptor signaling pathway; Prostate cancer; Influenza A; B cell receptor signaling pathway; Hepatitis C; Chronic myeloid leukemia; Non-alcoholic fatty liver disease (NAFLD); Hepatitis B; HTLV-I infection; Adipocytokine signaling pathway; T cell receptor signaling pathway; Type II diabetes mellitus; Epithelial cell signaling in Helicobacter pylo…	IRAK1 recruits IKK complex upon TLR7/8 or 9 stimulation; IKBKG deficiency causes anhidrotic ectodermal dysplasia with immunodeficiency (EDA-ID) (via TLR); Downstream TCR signaling; NOD1/2 Signaling Pathway; NF-kB activation through FADD/RIP-1 pathway mediated by caspase-8 and -10; TRAF6 mediated NF-kB activation; TICAM1, RIP1-mediated IKK complex recruitment ; TAK1 activates NFkB by phosphorylati…	Nucleotide-binding Oligomerization Domain (NOD) pathway; Osteopontin Signaling; Regulation of toll-like receptor signaling pathway; MicroRNAs in cardiomyocyte hypertrophy; Type II diabetes mellitus; IL-1 signaling pathway; RANKL/RANK (Receptor activator of NFKB (ligand)) Signaling Pathway; Leptin signaling pathway; TNF related weak inducer of apoptosis (TWEAK) Signaling Pathway; IL17 signaling pa…	8.329 (df=5)	2.04166e-06	2.08072e-05	0.939698	0.314268	0.931209	0.361791	3.20421e-05	0.0661147	0.999978	0.14042	4.88199e-06	0.106634	0.990074	0.00781422	0.153313	1.26657e-05	0.171184	0.185117	-0.461442	0.227526	-0.682313	-1.75223	-0.646558	0.0424096	-0.86743	-1.93735	0.688968	-0.220872	-1.29079	-0.90984	-1.97976	-1.06992	[-0.4004 , 0.7707]	[-1.1125 , 0.1896]	[-0.4691 , 0.9241]
O14925	Mitochondrial import inner membrane translocase subunit Tim23 OS=Homo sapiens OX=9606 GN=TIMM23 PE=1 SV=1	TIMM23	2	24	2	1		transport	membrane;mitochondrion	protein binding;transporter activity		Mitochondrial protein import; Metabolism of proteins		16.5485 (df=5)	3.14812e-11	2.1469e-09	0.133556	0.999954	0.892838	0.682429	4.73412e-11	0.379234	0.0316211	1	1.26028e-08	0.871396	0.803588	2.55839e-10	0.325471	3.89436e-11	4.09879e-06	-0.748462	-0.0676883	0.378751	-0.753698	-4.70599	0.680774	1.12721	-0.00523662	-3.95753	0.446439	-0.68601	-4.6383	-1.13245	-5.08474	-3.95229	[-1.6192 , 0.1222]	[-1.0558 , 0.9205]	[-0.6571 , 1.4146]
O14929	Histone acetyltransferase type B catalytic subunit OS=Homo sapiens OX=9606 GN=HAT1 PE=1 SV=1	HAT1	9	269	8	1		cell organization and biogenesis;metabolic process;regulation of biological process;response to stimulus	cytoplasm;nucleus	catalytic activity;protein binding	Alcoholism	HATs acetylate histones		6.1053 (df=5)	7.29881e-05	0.000393349	0.757986	0.295489	0.447274	0.343699	0.00292736	0.95373	0.0536703	0.829795	0.0362458	0.0113946	0.989441	0.176527	0.0358782	0.000118053	0.711913	-0.30804	-0.534985	0.500204	-0.790088	-1.51642	-0.226946	0.808243	-0.482049	-1.20838	1.03519	-0.255103	-0.98143	-1.29029	-2.01662	-0.726327	[-0.9752 , 0.3592]	[-1.2768 , 0.2069]	[-0.2936 , 1.294]
O14933	Ubiquitin/ISG15-conjugating enzyme E2 L6 OS=Homo sapiens OX=9606 GN=UBE2L6 PE=1 SV=4	UBE2L6	6	227	6	1	Methyl [K138]	metabolic process;regulation of biological process;response to stimulus	cytosol	catalytic activity;protein binding	Parkinson's disease; Ubiquitin mediated proteolysis	Termination of translesion DNA synthesis; ISG15 antiviral mechanism; Amyloid fiber formation; Negative regulators of DDX58/IFIH1 signaling; Antigen processing: Ubiquitination & Proteasome degradation	Parkin-Ubiquitin Proteasomal System pathway; Parkinsons Disease Pathway	1.8502 (df=5)	0.112012	0.159919	0.826771	0.20758	0.997631	0.950092	0.617478	0.852967	0.993302	0.620595	0.95636	0.643586	0.226404	0.999999	0.878889	0.850312	0.415501	-0.262045	-0.549038	-0.114844	0.325085	-0.581088	-0.286993	0.1472	0.58713	-0.319043	0.434194	0.874123	-0.0320501	0.439929	-0.466244	-0.906173	[-0.8896 , 0.3655]	[-1.2468 , 0.1487]	[-0.8614 , 0.6317]
O14936	Peripheral plasma membrane protein CASK OS=Homo sapiens OX=9606 GN=CASK PE=1 SV=3	CASK	17	328	17	1		metabolic process;regulation of biological process;transport	cytoplasm;cytoskeleton;cytosol;membrane;nucleus	catalytic activity;nucleotide binding;protein binding	Tight junction	Nephrin family interactions; Dopamine Neurotransmitter Release Cycle; Neurexins and neuroligins; Syndecan interactions	Parkin-Ubiquitin Proteasomal System pathway	2.3287 (df=5)	0.0496405	0.0817298	0.996086	0.999453	0.512401	0.181223	0.999999	0.999997	0.299077	0.326193	0.998914	0.440519	0.327881	0.999689	0.0172775	0.908279	0.413457	-0.0579712	-0.0427851	0.239986	-0.471283	0.0191139	0.0151862	0.297957	-0.413311	0.0770852	0.282771	-0.428498	0.061899	-0.711269	-0.220872	0.490397	[-0.397 , 0.281]	[-0.4197 , 0.3341]	[-0.1633 , 0.6433]
O14948	Transcription factor EC OS=Homo sapiens OX=9606 GN=TFEC PE=1 SV=1	TFEC	2	80	1	1		metabolic process;regulation of biological process;response to stimulus	nucleus	DNA binding;protein binding				6.0603 (df=5)	7.86629e-05	0.000420207	0.699768	0.000132016	0.984284	0.0252206	1	0.0163004	0.995017	0.207311	0.960421	0.0135302	0.999998	0.050655	0.136141	0.997956	0.154143	0.672831	2.44693	0.373711	2.53255	-0.00210686	1.77409	-0.29912	1.85972	-0.674938	-2.07321	0.085625	-2.44903	2.15884	-0.375818	-2.53466	[-0.6858 , 2.0315]	[0.9363 , 3.9576]	[-1.2427 , 1.9901]
O14949	Cytochrome b-c1 complex subunit 8 OS=Homo sapiens OX=9606 GN=UQCRQ PE=1 SV=4	UQCRQ	10	746	10	1		metabolic process;transport	membrane;mitochondrion	catalytic activity;transporter activity	Non-alcoholic fatty liver disease (NAFLD); Cardiac muscle contraction; Alzheimer's disease; Huntington's disease; Metabolic pathways; Oxidative phosphorylation; Parkinson's disease	Respiratory electron transport	Electron Transport Chain	10.9512 (df=5)	4.10587e-08	8.01085e-07	0.47058	0.00173128	0.000499309	0.94003	0.0824416	6.95532e-06	2.36742e-06	0.382955	0.00475119	0.993579	0.601144	0.999998	0.379311	0.999721	0.73689	0.553524	-1.37316	-1.59741	-0.485627	-1.433	-1.92669	-2.15093	-1.03915	-1.98652	-0.224242	0.887538	-0.0598355	1.11178	0.164407	-0.947373	[-0.3429 , 1.45]	[-2.3699 , -0.3764]	[-2.6639 , -0.5309]
O14950	Myosin regulatory light chain 12B OS=Homo sapiens OX=9606 GN=MYL12B PE=1 SV=2	MYL12B; MYL12A	16	2696	6	1	Methyl [K35; K51; K63]	regulation of biological process;response to stimulus	cytosol	metal ion binding;protein binding	Tight junction; Leukocyte transendothelial migration; Focal adhesion; Platelet activation; Regulation of actin cytoskeleton	RHO GTPases activate PAKs; EPHA-mediated growth cone collapse; RHO GTPases Activate ROCKs; Sema4D induced cell migration and growth-cone collapse; Smooth Muscle Contraction; RHO GTPases activate CIT; RHO GTPases activate PKNs	Human Thyroid Stimulating Hormone (TSH) signaling pathway	21.5457 (df=5)	9.26577e-14	1.63135e-11	0.990953	0.869594	0.486531	1	1.10123e-10	0.992717	0.816044	0.999763	1.10178e-10	0.986206	0.988382	1.11831e-10	0.888334	1.52875e-10	4.87679e-10	0.079631	0.166791	0.281748	0.0149193	2.30421	0.0871601	0.202117	-0.0647116	2.22458	0.114957	-0.151872	2.13742	-0.266828	2.02247	2.2893	[-0.3093 , 0.4686]	[-0.2657 , 0.5993]	[-0.181 , 0.7445]
O14964	Hepatocyte growth factor-regulated tyrosine kinase substrate OS=Homo sapiens OX=9606 GN=HGS PE=1 SV=1	HGS	25	1069	24	1		cell communication;cell organization and biogenesis;metabolic process;regulation of biological process;response to stimulus;transport	cytoplasm;cytosol;endosome;membrane;vacuole	catalytic activity;metal ion binding;protein binding	Endocytosis; Phagosome	Cargo recognition for clathrin-mediated endocytosis; Negative regulation of MET activity; Ub-specific processing proteases; EGFR downregulation; InlB-mediated entry of Listeria monocytogenes into host cell; Lysosome Vesicle Biogenesis; Endosomal Sorting Complex Required For Transport (ESCRT)	TGF-beta Signaling Pathway; VEGFA-VEGFR2 Signaling Pathway; EGF/EGFR Signaling Pathway	0.9182 (df=5)	0.473409	0.527641	0.996119	0.999732	0.918956	0.99992	0.69801	0.980066	0.742723	0.995769	0.862345	0.986141	1	0.632112	0.99807	0.364664	0.791471	0.129296	-0.0826204	-0.30671	-0.0997085	0.64486	-0.211917	-0.436007	-0.229005	0.515564	-0.22409	-0.0170881	0.72748	0.207002	0.95157	0.744568	[-0.6281 , 0.8867]	[-0.9248 , 0.7596]	[-1.2078 , 0.5944]
O14966	Ras-related protein Rab-7L1 OS=Homo sapiens OX=9606 GN=RAB29 PE=1 SV=1	RAB7L1; RAB29	7	313	6	1		cell differentiation;cell organization and biogenesis;metabolic process;regulation of biological process;response to stimulus;transport	cytoplasm;cytoskeleton;cytosol;endosome;Golgi;membrane;mitochondrion;vacuole	catalytic activity;nucleotide binding;protein binding		RAB geranylgeranylation		25.6337 (df=5)	1.50307e-15	6.09329e-13	0.561917	0.926584	0.883722	1.1012e-10	0.912103	0.995733	0.999684	1.10101e-10	1	0.999981	1.1012e-10	0.9991	1.10125e-10	0.999892	1.20778e-10	-0.5488	-0.356046	-0.429094	5.6755	-0.575129	0.192753	0.119706	6.2243	-0.0263295	-0.0730476	6.03155	-0.219083	6.10459	-0.146035	-6.25063	[-1.5134 , 0.4158]	[-1.4286 , 0.7165]	[-1.5767 , 0.7185]
O14967	Calmegin OS=Homo sapiens OX=9606 GN=CLGN PE=1 SV=1	CLGN	2	217	1	1		cell organization and biogenesis;metabolic process	endoplasmic reticulum;membrane	metal ion binding;protein binding				2.5077 (df=5)	0.0368372	0.063909	0.997594	0.965229	0.0434398	0.998909	0.934955	0.998741	0.128075	0.987634	0.840759	0.349511	0.952909	0.729394	0.20624	0.0659083	0.99805	0.149219	0.299905	1.18815	-0.213324	-0.525072	0.150685	1.03893	-0.362544	-0.674291	0.888242	-0.513229	-0.824977	-1.40147	-1.71322	-0.311748	[-0.8192 , 1.1176]	[-0.784 , 1.3838]	[0.0215 , 2.3548]
O14972	Vacuolar protein sorting-associated protein 26C OS=Homo sapiens OX=9606 GN=VPS26C PE=1 SV=1	DSCR3	7	141	7	1		transport	endosome;nucleus	transporter activity				3.6804 (df=5)	0.00466539	0.0118701	0.177543	0.828738	0.999998	0.52254	0.00539748	0.947332	0.44655	0.999444	0.220676	0.937222	0.948616	0.0767366	0.649591	0.0155668	0.660703	-0.685133	-0.389654	-0.0358788	-0.851915	-1.82145	0.295479	0.649254	-0.166781	-1.13631	0.353775	-0.46226	-1.43179	-0.816036	-1.78557	-0.969531	[-1.5271 , 0.1569]	[-1.3258 , 0.5465]	[-1.0376 , 0.9658]
O14974	Protein phosphatase 1 regulatory subunit 12A OS=Homo sapiens OX=9606 GN=PPP1R12A PE=1 SV=1	PPP1R12A	39	1374	2	1	Methyl [K285]	cell organization and biogenesis;metabolic process;regulation of biological process;response to stimulus	chromosome;cytoplasm;cytoskeleton;cytosol	enzyme regulator activity;protein binding;signal transducer activity	Focal adhesion; cAMP signaling pathway; cGMP-PKG signaling pathway; Proteoglycans in cancer; Oxytocin signaling pathway; Vascular smooth muscle contraction; Platelet activation; Regulation of actin cytoskeleton	RHO GTPases activate PAKs; RHO GTPases Activate ROCKs; Regulation of PLK1 Activity at G2/M Transition; RHO GTPases activate PKNs; RHO GTPases activate CIT	Focal Adhesion; Regulation of Actin Cytoskeleton	2.6578 (df=5)	0.0280362	0.0508839	0.823196	0.0898607	0.995728	0.999604	0.0579822	0.645518	0.995752	0.998653	0.28881	0.467309	0.752247	0.893313	1	0.197931	0.372337	0.19399	0.472032	0.0957204	0.0841892	0.776776	0.278042	-0.0982696	-0.109801	0.582786	-0.376312	-0.387843	0.304744	-0.0115312	0.681055	0.692587	[-0.2678 , 0.6558]	[-0.0415 , 0.9855]	[-0.4537 , 0.6451]
O14974-4	Isoform 4 of Protein phosphatase 1 regulatory subunit 12A OS=Homo sapiens OX=9606 GN=PPP1R12A	PPP1R12A	38	1385	1	1	Methyl [K285]	cell organization and biogenesis;metabolic process;regulation of biological process;response to stimulus	chromosome;cytoskeleton;cytosol	enzyme regulator activity;protein binding;signal transducer activity			Focal Adhesion; Regulation of Actin Cytoskeleton	0.9182 (df=4)	0.458433	0.51283	0.917031	0.960723	0.648824		0.932147	0.99999	0.972036		0.689722	0.967378		0.752854		0.467575		-0.384559	-0.342907	-0.709742		0.581068	0.0416518	-0.325183		0.965627	-0.366835		0.923975		1.29081		[-1.6664 , 0.8973]	[-1.7614 , 1.0756]	[-2.1612 , 0.7417]
O14975	Very long-chain acyl-CoA synthetase OS=Homo sapiens OX=9606 GN=SLC27A2 PE=1 SV=2	SLC27A2	1	2	1	1		metabolic process;transport	endoplasmic reticulum;membrane;mitochondrion;organelle lumen	catalytic activity;nucleotide binding;protein binding;transporter activity	Insulin resistance; Peroxisome; PPAR signaling pathway	Neutrophil degranulation; Synthesis of bile acids and bile salts via 24-hydroxycholesterol; Synthesis of bile acids and bile salts via 7alpha-hydroxycholesterol; Alpha-oxidation of phytanate	PPAR signaling pathway
O14976	Cyclin-G-associated kinase OS=Homo sapiens OX=9606 GN=GAK PE=1 SV=2	GAK	23	424	23	1	Met-loss+Acetyl [N-Term]	cell organization and biogenesis;metabolic process;regulation of biological process;transport	cytoplasm;cytosol;Golgi;membrane	catalytic activity;nucleotide binding;protein binding		Golgi Associated Vesicle Biogenesis; Clathrin-mediated endocytosis		5.9567 (df=5)	9.35095e-05	0.000481538	0.810318	0.950074	0.191898	0.00343717	0.454237	0.999895	0.811187	0.000326914	0.886572	0.746336	0.00102646	0.838551	4.0534e-05	0.999962	0.000547194	-0.564604	-0.442093	-1.2541	2.95554	-1.41517	0.122511	-0.689499	3.52015	-0.850563	-0.81201	3.39763	-0.973074	4.20964	-0.161064	-4.37071	[-1.8814 , 0.7522]	[-1.9062 , 1.022]	[-2.8207 , 0.3125]
O14979	Heterogeneous nuclear ribonucleoprotein D-like OS=Homo sapiens OX=9606 GN=HNRNPDL PE=1 SV=3	HNRNPDL; HNRPDL	18	1425	2	1	Methyl [K180; K204; K234; K250; K269]	metabolic process;regulation of biological process;response to stimulus	cytoplasm;cytosol;nucleus;spliceosomal complex	DNA binding;protein binding;RNA binding		Gene and protein expression by JAK-STAT signaling after Interleukin-12 stimulation; Interleukin-12 family signaling		3.4971 (df=5)	0.00643573	0.015377	0.579774	0.969744	0.925567	0.680086	0.0921416	0.985315	0.9988	0.169829	0.00750894	0.999931	0.418643	0.0380607	0.357195	0.0310554	0.940362	-0.267806	-0.142757	-0.189679	0.415586	0.751924	0.125048	0.0781263	0.683391	1.01973	-0.0469218	0.558343	0.894682	0.605265	0.941603	0.336339	[-0.7464 , 0.2108]	[-0.6749 , 0.3894]	[-0.7591 , 0.3797]
O14979-2	Isoform 2 of Heterogeneous nuclear ribonucleoprotein D-like OS=Homo sapiens OX=9606 GN=HNRNPDL	HNRNPDL; HNRPDL	17	1368	1	1	Methyl [K61; K85; K115; K131; K150]; Acetyl [N-Term]	metabolic process;regulation of biological process;response to stimulus	cytosol	DNA binding;protein binding;RNA binding
O14980	Exportin-1 OS=Homo sapiens OX=9606 GN=XPO1 PE=1 SV=1	XPO1	51	2878	51	1	Methyl [K722; K995; K1023]	cell organization and biogenesis;regulation of biological process;response to stimulus;transport	chromosome;cytoplasm;cytosol;membrane;nucleus	protein binding;RNA binding;transporter activity	Influenza A; HTLV-I infection; Epstein-Barr virus infection; RNA transport; Ribosome biogenesis in eukaryotes	Rev-mediated nuclear export of HIV RNA; Downregulation of TGF-beta receptor signaling; NEP/NS2 Interacts with the Cellular Export Machinery; Cyclin A/B1/B2 associated events during G2/M transition; Amplification of signal from unattached kinetochores via a MAD2 inhibitory signal; Deactivation of the beta-catenin transactivating complex; Separation of Sister Chromatids; Resolution of Sister Chroma…	eIF5A regulation in response to inhibition of the nuclear export system	8.7127 (df=5)	1.12921e-06	1.28748e-05	0.60566	0.964455	0.125755	0.923416	5.48391e-05	0.990709	0.00401346	0.420603	0.00204616	0.0425226	0.70847	0.000901438	0.978859	2.99753e-07	0.000241743	-0.136287	-0.0773112	0.258131	0.143717	-0.727095	0.0589759	0.394419	0.280004	-0.590808	0.335443	0.221028	-0.649784	-0.114414	-0.985227	-0.870813	[-0.3859 , 0.1134]	[-0.3549 , 0.2003]	[-0.0389 , 0.5551]
O14981	TATA-binding protein-associated factor 172 OS=Homo sapiens OX=9606 GN=BTAF1 PE=1 SV=2	BTAF1	17	119	17	1		regulation of biological process	nucleus	catalytic activity;DNA binding;nucleotide binding;protein binding				9.3223 (df=5)	4.4723e-07	5.85895e-06	0.231024	0.999263	0.655924	0.406399	2.7217e-06	0.593636	0.0170379	0.991336	0.000582855	0.557278	0.605092	2.12326e-05	0.0792435	2.64933e-07	0.0504097	-0.51898	-0.0907142	0.417499	-0.757363	-2.26231	0.428265	0.936478	-0.238383	-1.74333	0.508213	-0.666649	-2.1716	-1.17486	-2.67981	-1.50495	[-1.1949 , 0.1569]	[-0.8423 , 0.6608]	[-0.3866 , 1.2216]
O14983	Sarcoplasmic/endoplasmic reticulum calcium ATPase 1 OS=Homo sapiens OX=9606 GN=ATP2A1 PE=1 SV=1	ATP2A1	29	1333	10	1	Methyl [K120; K189; K728]	cell organization and biogenesis;cellular homeostasis;regulation of biological process;response to stimulus;transport	endoplasmic reticulum;membrane;mitochondrion	catalytic activity;metal ion binding;nucleotide binding;protein binding;transporter activity	Calcium signaling pathway; Pancreatic secretion; Alzheimer's disease; cGMP-PKG signaling pathway	Ion homeostasis; Pre-NOTCH Processing in Golgi; Ion transport by P-type ATPases; Reduction of cytosolic Ca++ levels	Alzheimers Disease	1.5599 (df=5)	0.181126	0.236689	0.912696	0.987581	0.999595	0.999998	0.301235	0.677599	0.994492	0.987363	0.0997133	0.962772	0.999811	0.617328	0.999751	0.279538	0.705175	-0.506473	0.354558	-0.18081	0.0964883	1.75369	0.861032	0.325663	0.602962	2.26016	-0.535369	-0.25807	1.39913	0.277298	1.9345	1.6572	[-1.9686 , 0.9556]	[-1.2637 , 1.9728]	[-1.8772 , 1.5156]
O15013	Rho guanine nucleotide exchange factor 10 OS=Homo sapiens OX=9606 GN=ARHGEF10 PE=1 SV=4	ARHGEF10	3	38	2	1		cell organization and biogenesis;regulation of biological process	cytosol	protein binding		G alpha (12/13) signalling events; NRAGE signals death through JNK; Signalling by NGF; Rho GTPase cycle		14.2655 (df=5)	4.89968e-10	1.9753e-08	0.212643	0.999993	0.955524	0.000848687	1.63413e-09	0.434846	0.905112	0.0587293	4.43425e-07	0.985781	0.00235522	8.88772e-09	0.0145757	1.18083e-07	0.060177	-0.480788	-0.0318558	-0.214595	-1.52627	-2.94282	0.448932	0.266194	-1.04549	-2.46203	-0.182739	-1.49442	-2.91097	-1.31168	-2.72823	-1.41655	[-1.0952 , 0.1336]	[-0.715 , 0.6513]	[-0.9455 , 0.5163]
O15018	PDZ domain-containing protein 2 OS=Homo sapiens OX=9606 GN=PDZD2 PE=1 SV=4	PDZD2	2	130	2	1			cytoplasm;endoplasmic reticulum;extracellular;nucleus	protein binding				7.7129 (df=5)	5.3656e-06	4.61043e-05	0.515623	0.999998	0.997764	0.487521	1.72306e-06	0.591629	0.921749	0.974018	0.000131319	0.996307	0.501155	4.35856e-06	0.751904	3.29374e-05	0.0307622	-0.368335	0.0257439	-0.112243	-0.647946	-2.11741	0.394079	0.256092	-0.279612	-1.74907	-0.137987	-0.67369	-2.14315	-0.535704	-2.00517	-1.46946	[-0.9891 , 0.2524]	[-0.6645 , 0.716]	[-0.8508 , 0.6263]
O15020	Spectrin beta chain, non-erythrocytic 2 OS=Homo sapiens OX=9606 GN=SPTBN2 PE=1 SV=3	SPTBN2	77	1863	60	1	Methyl [K375; K1423; K1424]	cell organization and biogenesis;cellular component movement;metabolic process;regulation of biological process;response to stimulus;transport	cytoplasm;cytoskeleton;cytosol;membrane	protein binding;structural molecule activity		Interaction between L1 and Ankyrins; COPI-mediated anterograde transport; MHC class II antigen presentation; RAF/MAP kinase cascade; NCAM signaling for neurite out-growth; Interleukin-20 family signaling		3.3005 (df=5)	0.00908802	0.020411	0.73078	0.984041	0.289088	0.190598	0.999986	0.993352	0.0232033	0.66123	0.98702	0.140394	0.467813	0.999807	0.00885884	0.663338	0.549027	0.309779	0.167286	-0.559758	0.892076	0.0598745	-0.142493	-0.869538	0.582296	-0.249905	-0.727044	0.724789	-0.107412	1.45183	0.619633	-0.832201	[-0.3388 , 0.9583]	[-0.5538 , 0.8884]	[-1.3313 , 0.2118]
O15021	Microtubule-associated serine/threonine-protein kinase 4 OS=Homo sapiens OX=9606 GN=MAST4 PE=1 SV=4		2	138	1	1								2.2572 (df=3)	0.0931597	0.137054		0.954925	0.1447	0.971313						0.087776	0.885255		0.803443				-0.235059	1.01394	0.320098						1.249	0.555157		-0.693846				[-1.4461 , 0.976]	[-0.2257 , 2.2536]
O15027	Protein transport protein Sec16A OS=Homo sapiens OX=9606 GN=SEC16A PE=1 SV=4		28	412	28	1								0.7847 (df=5)	0.563598	0.611899	0.999999	0.97787	0.959373	0.991869	0.799434	0.970404	0.949341	0.988968	0.832355	0.999991	0.999998	0.563715	1	0.526306	0.709895	-0.0121059	0.117618	0.144871	0.145399	-0.316858	0.129724	0.156977	0.157505	-0.304752	0.0272524	0.027781	-0.434477	0.000528598	-0.461729	-0.462258	[-0.4357 , 0.4115]	[-0.3534 , 0.5887]	[-0.3591 , 0.6489]
O15031	Plexin-B2 OS=Homo sapiens OX=9606 GN=PLXNB2 PE=1 SV=3	PLXNB2	35	552	33	1		cell proliferation;development;regulation of biological process;response to stimulus	cell surface;membrane	protein binding;receptor activity;signal transducer activity	Axon guidance			0.7987 (df=5)	0.55371	0.603229	0.999533	1	0.922141	0.730344	0.996455	0.999799	0.826639	0.626774	0.999675	0.946173	0.767003	0.997387	0.985806	0.886996	0.696895	0.076104	0.00263142	-0.277524	-0.56774	0.198937	-0.0734725	-0.353628	-0.643844	0.122833	-0.280155	-0.570371	0.196306	-0.290216	0.476461	0.766677	[-0.6163 , 0.7685]	[-0.7672 , 0.7724]	[-1.1012 , 0.5462]
O15037	Protein KHNYN OS=Homo sapiens OX=9606 GN=KHNYN PE=1 SV=3	KHNYN	4	10	4	1				RNA binding				1.6768 (df=5)	0.150597	0.203502	0.367603	0.920124	0.999994	0.997368	0.997509	0.0747399	0.655713	0.98789	0.975197	0.927098	0.909796	0.893694	0.999296	0.999447	1	-0.600753	0.324809	-0.047525	-0.250569	-0.225616	0.925562	0.553228	0.350184	0.375137	-0.372334	-0.575378	-0.550425	-0.203044	-0.178091	0.0249529	[-1.4914 , 0.2899]	[-0.6359 , 1.2855]	[-1.0984 , 1.0033]
O15040	Tectonin beta-propeller repeat-containing protein 2 OS=Homo sapiens OX=9606 GN=TECPR2 PE=1 SV=4	TECPR2	4	28	4	1		metabolic process		protein binding				2.9399 (df=4)	0.0255593	0.0471331	0.0943264	0.973889	0.976444	0.998439		0.0555875	0.0726287	0.415637		1	0.999972		0.999966			0.909364	-0.246801	-0.251543	-0.178357		-1.15616	-1.16091	-1.08772		-0.00474178	0.0684443		0.0731861			[-0.0942 , 1.913]	[-1.3858 , 0.8922]	[-1.4455 , 0.9424]
O15042	U2 snRNP-associated SURP motif-containing protein OS=Homo sapiens OX=9606 GN=U2SURP PE=1 SV=2	U2SURP	23	755	23	1		metabolic process	nucleus	protein binding;RNA binding	Spliceosome	mRNA Splicing - Major Pathway		5.8086 (df=5)	0.000119824	0.000594799	1	0.0845588	0.998703	0.967093	0.00447938	0.0879375	0.997648	0.975849	0.00606848	0.391752	0.159524	1.91191e-05	0.919184	0.00486795	0.221814	-0.0110722	0.432474	0.0676503	-0.196729	-0.920874	0.443547	0.0787225	-0.185657	-0.909802	-0.364824	-0.629203	-1.35335	-0.264379	-0.988524	-0.724145	[-0.4302 , 0.4081]	[-0.0335 , 0.8985]	[-0.431 , 0.5663]
O15047	Histone-lysine N-methyltransferase SETD1A OS=Homo sapiens OX=9606 GN=SETD1A PE=1 SV=3	SETD1A	8	110	5	1		cell organization and biogenesis;metabolic process;regulation of biological process	chromosome;nucleus	catalytic activity;protein binding;RNA binding	Lysine degradation	PKMTs methylate histone lysines; RUNX1 regulates genes involved in megakaryocyte differentiation and platelet function	Histone Modifications	2.1348 (df=5)	0.0692484	0.107102	0.939281	0.800316	0.694927	0.934764	0.0987167	0.998162	0.985972	0.690851	0.310211	0.999887	0.55156	0.517282	0.470252	0.657334	0.0748539	0.24979	0.381796	0.467232	-0.436248	1.2256	0.132006	0.217442	-0.686038	0.975805	0.085436	-0.818044	0.8438	-0.90348	0.758364	1.66184	[-0.539 , 1.0386]	[-0.4952 , 1.2588]	[-0.4712 , 1.4056]
O15056	Synaptojanin-2 OS=Homo sapiens OX=9606 GN=SYNJ2 PE=1 SV=3	SYNJ2	2	6	1	1		cell organization and biogenesis;metabolic process	cytoplasm;cytoskeleton;cytosol;membrane	catalytic activity;protein binding;RNA binding	Metabolic pathways; Phosphatidylinositol signaling system; Inositol phosphate metabolism	Synthesis of PIPs at the plasma membrane; Clathrin-mediated endocytosis
O15061	Synemin OS=Homo sapiens OX=9606 GN=SYNM PE=1 SV=2	SYNM	102	2931	102	1	Methyl [K301; K735; K785; K987; K1286]	cell organization and biogenesis	cytoplasm;cytoskeleton;membrane	protein binding;structural molecule activity				5.6768 (df=5)	0.000149514	0.000713542	0.960843	0.225588	0.0257991	0.186205	0.99497	0.0512878	0.00420036	0.445629	0.917557	0.93064	0.00648946	0.94863	0.00091101	0.639023	0.242345	0.132392	-0.398875	-0.598981	0.642275	-0.14381	-0.531267	-0.731374	0.509883	-0.276203	-0.200106	1.04115	0.255065	1.24126	0.455171	-0.786086	[-0.3322 , 0.597]	[-0.9155 , 0.1177]	[-1.1517 , -0.0462]
O15066	Kinesin-like protein KIF3B OS=Homo sapiens OX=9606 GN=KIF3B PE=1 SV=1	KIF3B	6	83	4	1		cell organization and biogenesis;cellular component movement;regulation of biological process;transport	cytoplasm;cytoskeleton;cytosol;membrane	catalytic activity;motor activity;nucleotide binding;protein binding		Translocation of GLUT4 to the plasma membrane; COPI-dependent Golgi-to-ER retrograde traffic; Kinesins; Intraflagellar transport; MHC class II antigen presentation		7.5204 (df=5)	7.28526e-06	5.91988e-05	1	0.948624	0.987388	0.991528	3.41648e-06	0.967399	0.98323	0.989049	5.55202e-06	0.767465	0.877702	9.54093e-05	0.999994	3.55636e-06	0.00010216	-0.0184171	-0.2501	0.193802	0.256194	-2.45253	-0.231683	0.212219	0.274611	-2.43411	0.443903	0.506294	-2.20243	0.0623916	-2.64633	-2.70872	[-0.7582 , 0.7214]	[-1.0727 , 0.5725]	[-0.6864 , 1.074]
O15067	Phosphoribosylformylglycinamidine synthase OS=Homo sapiens OX=9606 GN=PFAS PE=1 SV=4	PFAS	47	1247	47	1		metabolic process;response to stimulus	cytoplasm;cytosol	catalytic activity;metal ion binding;nucleotide binding	Metabolic pathways; Purine metabolism	Purine ribonucleoside monophosphate biosynthesis		14.251 (df=5)	4.64685e-10	1.91571e-08	0.339602	0.991688	0.0489668	0.000122372	1.87162e-05	0.838922	0.000310471	0.00890238	0.00190888	0.027372	0.00110409	0.00021134	2.32439e-07	3.35661e-08	0.999097	0.24483	0.0789857	-0.421648	0.986417	1.08557	-0.165844	-0.666478	0.741586	0.840744	-0.500634	0.907431	1.00659	1.40806	1.50722	0.099158	[-0.1086 , 0.5983]	[-0.314 , 0.472]	[-0.8421 , -0.0012]
O15075	Serine/threonine-protein kinase DCLK1 OS=Homo sapiens OX=9606 GN=DCLK1 PE=1 SV=2	DCLK1	27	700	27	1		cell differentiation;cell growth;cell organization and biogenesis;cellular component movement;development;metabolic process;regulation of biological process;response to stimulus;transport		catalytic activity;nucleotide binding;signal transducer activity				0.8576 (df=5)	0.51322	0.565192	0.859697	0.989625	0.999956	1	0.785343	0.602872	0.975486	0.988767	0.989222	0.981522	0.998433	0.592861	0.999999	0.890497	0.925304	-0.227135	0.135385	-0.0467174	-0.0116714	-0.440654	0.36252	0.180418	0.215464	-0.213519	-0.182103	-0.147056	-0.576039	0.0350461	-0.393936	-0.428982	[-0.8044 , 0.3501]	[-0.5064 , 0.7772]	[-0.7335 , 0.64]
O15078	Centrosomal protein of 290 kDa OS=Homo sapiens OX=9606 GN=CEP290 PE=1 SV=2	CEP290	6	465	6	1		cell organization and biogenesis;regulation of biological process;transport	cytoplasm;cytoskeleton;cytosol;extracellular;membrane;nucleus;organelle lumen	protein binding		Neutrophil degranulation; Regulation of PLK1 Activity at G2/M Transition; AURKA Activation by TPX2; Anchoring of the basal body to the plasma membrane; Recruitment of NuMA to mitotic centrosomes; Loss of Nlp from mitotic centrosomes; Recruitment of mitotic centrosome proteins and complexes		2.083 (df=5)	0.075636	0.115536	0.99199	0.932748	0.998443	0.280857	0.597333	0.99844	0.95131	0.155018	0.810963	0.848723	0.106194	0.934262	0.52941	0.503962	0.0553699	0.0658737	0.119309	-0.0553853	-0.414473	0.311967	0.0534349	-0.121259	-0.480347	0.246093	-0.174694	-0.533782	0.192658	-0.359088	0.367352	0.72644	[-0.2645 , 0.3963]	[-0.248 , 0.4867]	[-0.4484 , 0.3377]
O15083	ERC protein 2 OS=Homo sapiens OX=9606 GN=ERC2 PE=1 SV=3	ERC2	6	149	1	1		transport	cytoplasm;cytoskeleton	protein binding;transporter activity			Exercise-induced Circadian Regulation	3.3807 (df=4)	0.0135651	0.028249	0.937981	0.0623858	0.999913	0.0598302		0.339164	0.986004	0.198849		0.193751	0.918923		0.118424			-0.311546	-1.20276	-0.0634354	-1.78921		-0.891213	0.24811	-1.47767		1.13932	-0.586454		-1.72578			[-1.441 , 0.8179]	[-2.445 , 0.0395]	[-1.3368 , 1.2099]
O15084-1	Isoform 3 of Serine/threonine-protein phosphatase 6 regulatory ankyrin repeat subunit A OS=Homo sapiens OX=9606 GN=ANKRD28	ANKRD28	8	105	6	1		cell organization and biogenesis	cytosol;membrane	protein binding				1.1531 (df=5)	0.339302	0.3994	0.957733	0.999997	0.999558	1	0.407134	0.957367	0.998881	0.994975	0.180653	0.998895	1	0.5104	0.999887	0.371238	0.705791	-0.273559	0.0409329	-0.121866	0.0221416	1.05574	0.314492	0.151693	0.295701	1.3293	-0.162799	-0.0187912	1.01481	0.144008	1.17761	1.0336	[-1.2164 , 0.6693]	[-1.0074 , 1.0892]	[-1.2435 , 0.9998]
O15085	Rho guanine nucleotide exchange factor 11 OS=Homo sapiens OX=9606 GN=ARHGEF11 PE=1 SV=1	ARHGEF11	27	255	27	1		cell organization and biogenesis;cellular component movement;regulation of biological process;response to stimulus	cytoplasm;cytosol;membrane	enzyme regulator activity;protein binding	Pathways in cancer; Vascular smooth muscle contraction	G alpha (12/13) signalling events; NRAGE signals death through JNK; Sema4D induced cell migration and growth-cone collapse; Rho GTPase cycle; Signalling by NGF		7.2731 (df=5)	1.08194e-05	8.26691e-05	0.0929742	0.999704	0.551104	0.873852	8.81574e-06	0.106766	0.993799	0.997986	0.00360901	0.495442	0.816192	1.26865e-05	1	0.0023674	0.0170899	0.473811	-0.0576732	0.354255	0.339826	1.64803	-0.531484	-0.119556	-0.133985	1.17422	0.411928	0.397499	1.70571	-0.0144291	1.29378	1.30821	[-0.0444 , 0.992]	[-0.6338 , 0.5185]	[-0.2622 , 0.9708]
O15091	Mitochondrial ribonuclease P catalytic subunit OS=Homo sapiens OX=9606 GN=PRORP PE=1 SV=2	KIAA0391	10	51	10	1		metabolic process	mitochondrion;nucleus;organelle lumen	catalytic activity;protein binding		tRNA processing in the mitochondrion; rRNA processing in the mitochondrion		2.6419 (df=5)	0.0288245	0.0521141	0.21006	0.677193	0.997552	1	0.130527	0.993261	0.201049	0.731656	0.85041	0.561842	0.921612	0.676908	0.999928	0.103823	0.352469	-0.618909	-0.445129	0.145324	0.0354491	-1.16822	0.173781	0.764233	0.654358	-0.549307	0.590453	0.480578	-0.723087	-0.109875	-1.31354	-1.20366	[-1.4075 , 0.1697]	[-1.322 , 0.4317]	[-0.7929 , 1.0835]
O15111	Inhibitor of nuclear factor kappa-B kinase subunit alpha OS=Homo sapiens OX=9606 GN=CHUK PE=1 SV=2	CHUK	9	150	8	1		cell differentiation;defense response;metabolic process;regulation of biological process;response to stimulus	cytoplasm;cytosol;nucleus	catalytic activity;nucleotide binding;protein binding	Pathways in cancer; Chemokine signaling pathway; Epstein-Barr virus infection; Hepatitis C; Hepatitis B; mTOR signaling pathway; T cell receptor signaling pathway; HTLV-I infection; Shigellosis; Acute myeloid leukemia; RIG-I-like receptor signaling pathway; Chronic myeloid leukemia; Toll-like receptor signaling pathway; NOD-like receptor signaling pathway; Apoptosis; Chagas disease (American tryp…	IRAK1 recruits IKK complex upon TLR7/8 or 9 stimulation; IKBKG deficiency causes anhidrotic ectodermal dysplasia with immunodeficiency (EDA-ID) (via TLR); Downstream TCR signaling; NOD1/2 Signaling Pathway; NF-kB activation through FADD/RIP-1 pathway mediated by caspase-8 and -10; TRAF6 mediated NF-kB activation; TICAM1, RIP1-mediated IKK complex recruitment ; NIK-->noncanonical NF-kB signaling; …	Nucleotide-binding Oligomerization Domain (NOD) pathway; Osteopontin Signaling; Regulation of toll-like receptor signaling pathway; MicroRNAs in cardiomyocyte hypertrophy; IL-1 signaling pathway; RANKL/RANK (Receptor activator of NFKB (ligand)) Signaling Pathway; Leptin signaling pathway; TNF related weak inducer of apoptosis (TWEAK) Signaling Pathway; B Cell Receptor Signaling Pathway; TNF alpha…	2.4516 (df=5)	0.0401295	0.0686095	0.999996	0.997117	0.961568	0.942053	0.052723	0.999336	0.981054	0.925272	0.0483847	0.999253	0.856141	0.0360086	0.741165	0.022394	0.648073	0.0454211	0.189643	0.359087	-0.571525	-1.81273	0.144221	0.313666	-0.616946	-1.85815	0.169445	-0.761167	-2.00238	-0.930612	-2.17182	-1.24121	[-1.0185 , 1.1094]	[-0.9933 , 1.3726]	[-0.9067 , 1.6249]
O15116	U6 snRNA-associated Sm-like protein LSm1 OS=Homo sapiens OX=9606 GN=LSM1 PE=1 SV=1	LSM1	4	140	4	1		metabolic process;regulation of biological process	cytoplasm;cytosol;nucleus	protein binding;RNA binding	RNA degradation	mRNA decay by 5' to 3' exoribonuclease		2.2717 (df=5)	0.0547573	0.088243	0.212322	0.180601	0.981699	0.980553	0.132295	0.999654	0.840971	0.989624	0.85172	0.745958	0.969461	0.937352	0.999946	0.423496	0.733112	-0.686645	-0.790674	-0.249599	-0.36493	-1.29604	-0.104028	0.437046	0.321715	-0.609396	0.541075	0.425743	-0.505368	-0.115331	-1.04644	-0.931112	[-1.5637 , 0.1904]	[-1.7658 , 0.1845]	[-1.293 , 0.7938]
O15117	FYN-binding protein 1 OS=Homo sapiens OX=9606 GN=FYB1 PE=1 SV=2	FYB; FYB1	20	389	20	1	Methyl [K517]	cell organization and biogenesis;metabolic process;regulation of biological process;response to stimulus;transport	cytoplasm;cytoskeleton;cytosol;membrane;nucleus	protein binding	Rap1 signaling pathway	Generation of second messenger molecules; Signal regulatory protein family interactions	T-Cell antigen Receptor (TCR) Signaling Pathway	3.9711 (df=5)	0.00280465	0.00782919	0.928804	0.700594	0.178035	0.760125	0.188833	0.23254	0.0311215	0.971383	0.0572429	0.938878	0.265218	0.763029	0.07358	0.987049	0.0612973	0.378292	-0.631693	-1.11101	0.90714	-1.58269	-1.00999	-1.4893	0.528849	-1.96098	-0.479318	1.53883	-0.950993	2.01815	-0.471675	-2.48983	[-0.77 , 1.5266]	[-1.9085 , 0.6451]	[-2.4772 , 0.2552]
O15118	NPC intracellular cholesterol transporter 1 OS=Homo sapiens OX=9606 GN=NPC1 PE=1 SV=2	NPC1	16	298	16	1		cell organization and biogenesis;metabolic process;regulation of biological process;response to stimulus;transport	endoplasmic reticulum;endosome;extracellular;Golgi;membrane;vacuole	protein binding;receptor activity;signal transducer activity;transporter activity	Lysosome	LDL clearance	Irinotecan Pathway	1.2981 (df=5)	0.272675	0.333396	0.383962	0.739225	0.999991	0.969832	0.715708	0.999214	0.516663	0.999327	0.999749	0.786422	0.999998	0.996092	0.963761	0.723825	0.996405	-0.885411	-0.698842	0.0783183	-0.611538	-1.10923	0.186569	0.96373	0.273874	-0.223816	0.77716	0.0873044	-0.410385	-0.689856	-1.18755	-0.49769	[-2.2149 , 0.4441]	[-2.177 , 0.7793]	[-1.5033 , 1.66]
O15121	Sphingolipid delta(4)-desaturase DES1 OS=Homo sapiens OX=9606 GN=DEGS1 PE=1 SV=1	DEGS1	4	32	4	1		metabolic process;transport	endoplasmic reticulum;membrane;mitochondrion	catalytic activity	Sphingolipid metabolism; Metabolic pathways; Sphingolipid signaling pathway	Neutrophil degranulation; Sphingolipid de novo biosynthesis		1.9487 (df=5)	0.0954061	0.139935	0.997275	0.995837	0.7656	0.999616	0.189258	1	0.943644	0.99261	0.118713	0.967775	0.990476	0.125493	0.858349	0.0391584	0.622422	-0.143406	-0.170077	-0.493543	0.159956	1.21716	-0.0266709	-0.350137	0.303362	1.36056	-0.323466	0.330033	1.38723	0.653499	1.7107	1.0572	[-1.0497 , 0.7629]	[-1.1528 , 0.8127]	[-1.5743 , 0.5872]
O15126	Secretory carrier-associated membrane protein 1 OS=Homo sapiens OX=9606 GN=SCAMP1 PE=1 SV=2	SCAMP1	7	185	7	1		transport	endosome;Golgi;membrane	protein binding		Neutrophil degranulation		1.6292 (df=5)	0.161311	0.21515	0.734486	0.906289	0.804815	0.918576	0.985063	0.24526	0.999999	0.99997	0.692939	0.344892	0.614308	1	0.999998	0.711083	0.795737	-0.259504	0.21436	-0.280735	-0.319083	0.214048	0.473865	-0.0212312	-0.0595784	0.473552	-0.495096	-0.533443	-0.000312154	-0.0383472	0.494784	0.533131	[-0.8052 , 0.2862]	[-0.3924 , 0.8211]	[-0.93 , 0.3685]
O15127	Secretory carrier-associated membrane protein 2 OS=Homo sapiens OX=9606 GN=SCAMP2 PE=1 SV=2	SCAMP2	6	468	6	1		transport	endosome;Golgi;membrane	protein binding			Serotonin Transporter Activity; Monoamine Transport	3.2869 (df=5)	0.00930834	0.0208097	0.840132	1	0.999358	0.607458	0.0397662	0.873493	0.780587	0.949325	0.00593219	0.999884	0.626538	0.0665839	0.541879	0.119155	0.00845837	-0.169174	0.0127311	0.0578622	-0.387616	0.732378	0.181905	0.227036	-0.218442	0.901552	0.0451311	-0.400347	0.719647	-0.445478	0.674516	1.11999	[-0.5837 , 0.2454]	[-0.4482 , 0.4736]	[-0.4353 , 0.551]
O15143	Actin-related protein 2/3 complex subunit 1B OS=Homo sapiens OX=9606 GN=ARPC1B PE=1 SV=3	ARPC1B	33	4120	30	1	Methyl [K18; K82; K87; K110; K165; K188; K233; K289; K308; K326; K339; K367; K370]; Met-loss+Acetyl [N-Term]	cell organization and biogenesis;cellular component movement;regulation of biological process;response to stimulus	cytoplasm;cytoskeleton;cytosol	protein binding;structural molecule activity	Bacterial invasion of epithelial cells; Pathogenic Escherichia coli infection; Fc gamma R-mediated phagocytosis; Salmonella infection; Shigellosis; Regulation of actin cytoskeleton; Endocytosis	Regulation of actin dynamics for phagocytic cup formation; EPHB-mediated forward signaling; RHO GTPases Activate WASPs and WAVEs	Pathogenic Escherichia coli infection; Microglia Pathogen Phagocytosis Pathway	4.1962 (df=5)	0.0018935	0.00564646	0.995055	0.920644	0.0909296	0.998464	0.0618248	0.99604	0.0367732	0.980735	0.0307578	0.0197547	0.917421	0.0172174	0.763083	0.944123	0.429898	-0.0567514	-0.118856	0.344681	0.0761218	0.526389	-0.0621049	0.401433	0.132873	0.58314	0.463538	0.194978	0.645245	-0.268559	0.181707	0.450267	[-0.3725 , 0.259]	[-0.4699 , 0.2322]	[-0.031 , 0.7203]
O15144	Actin-related protein 2/3 complex subunit 2 OS=Homo sapiens OX=9606 GN=ARPC2 PE=1 SV=1	ARPC2	32	5239	32	1	Methyl [K18; K65; K77; K106; K117; K136; K179; K186; K210; K275]	cell organization and biogenesis;cellular component movement;regulation of biological process;response to stimulus	cytoplasm;cytoskeleton;cytosol;endosome;membrane	protein binding;structural molecule activity	Fc gamma R-mediated phagocytosis; Salmonella infection; Bacterial invasion of epithelial cells; Pathogenic Escherichia coli infection; Shigellosis; Regulation of actin cytoskeleton; Endocytosis	EPHB-mediated forward signaling; Clathrin-mediated endocytosis; RHO GTPases Activate WASPs and WAVEs; Regulation of actin dynamics for phagocytic cup formation	Pathogenic Escherichia coli infection	5.0204 (df=5)	0.000455808	0.00176635	0.999991	0.907181	0.0295864	0.0750621	0.999964	0.952346	0.0269713	0.0998167	0.999795	0.00532203	0.358928	0.964116	0.0002594	0.458763	0.218663	-0.0112346	-0.0893472	0.289414	-0.369678	0.0255865	-0.0781126	0.300649	-0.358443	0.0368211	0.378761	-0.28033	0.114934	-0.659092	-0.263828	0.395264	[-0.2393 , 0.2168]	[-0.3429 , 0.1642]	[0.0181 , 0.5607]
O15145	Actin-related protein 2/3 complex subunit 3 OS=Homo sapiens OX=9606 GN=ARPC3 PE=1 SV=3	ARPC3	16	2073	16	1	Methyl [K37; K50]	cell organization and biogenesis;cellular component movement;regulation of biological process;response to stimulus	cytoplasm;cytoskeleton;cytosol;membrane	protein binding;structural molecule activity	Shigellosis; Salmonella infection; Bacterial invasion of epithelial cells; Endocytosis; Fc gamma R-mediated phagocytosis; Regulation of actin cytoskeleton; Pathogenic Escherichia coli infection	EPHB-mediated forward signaling; Clathrin-mediated endocytosis; RHO GTPases Activate WASPs and WAVEs; Regulation of actin dynamics for phagocytic cup formation	Pathogenic Escherichia coli infection	10.9923 (df=5)	3.87172e-08	7.67716e-07	0.997542	0.206568	0.595858	0.999812	3.36315e-08	0.103523	0.389227	1	1.57936e-08	0.996465	0.55643	5.33915e-05	0.796239	2.26783e-05	1.03324e-05	-0.044404	0.250881	0.187797	-0.0448587	1.13001	0.295285	0.232201	-0.000454787	1.17441	-0.0630839	-0.295739	0.879126	-0.232655	0.94221	1.17487	[-0.3308 , 0.242]	[-0.0676 , 0.5694]	[-0.153 , 0.5286]
O15155	BET1 homolog OS=Homo sapiens OX=9606 GN=BET1 PE=1 SV=1	BET1	2	96	2	1		cell organization and biogenesis;transport	endoplasmic reticulum;Golgi;membrane	protein binding	SNARE interactions in vesicular transport	COPI-mediated anterograde transport; COPII (Coat Protein 2) Mediated Vesicle Transport		3.1522 (df=4)	0.0186238	0.0365516	0.951339	0.280813	0.311793	0.937194		0.682822	0.109721	0.996704		0.00894431	0.986108		0.298751			-0.168502	-0.528539	0.536766	-0.311116		-0.360037	0.705268	-0.142613		1.0653	0.217423		-0.847882			[-0.8223 , 0.4853]	[-1.2705 , 0.2134]	[-0.241 , 1.3145]
O15160	DNA-directed RNA polymerases I and III subunit RPAC1 OS=Homo sapiens OX=9606 GN=POLR1C PE=1 SV=1	POLR1C	10	286	10	1	Met-loss+Acetyl [N-Term]	metabolic process;regulation of biological process	cytosol;nucleus	catalytic activity;DNA binding;protein binding	Purine metabolism; Metabolic pathways; Cytosolic DNA-sensing pathway; Epstein-Barr virus infection; Pyrimidine metabolism; RNA polymerase	RNA Polymerase III Abortive And Retractive Initiation; RNA Polymerase III Transcription Termination; RNA Polymerase I Transcription Termination; RNA Polymerase I Chain Elongation; NoRC negatively regulates rRNA expression; RNA Polymerase III Transcription Initiation From Type 1 Promoter; RNA Polymerase III Transcription Initiation From Type 3 Promoter; RNA Polymerase I Promoter Escape; B-WICH com…		1.2441 (df=5)	0.296091	0.357534	0.99289	0.999993	0.961185	0.813786	0.300884	0.988708	0.999347	0.945059	0.510119	0.953538	0.802117	0.311154	0.989355	0.724164	0.986343	-0.102793	0.027633	-0.178967	-0.387087	-0.651328	0.130426	-0.0761734	-0.284294	-0.548534	-0.2066	-0.41472	-0.678961	-0.208121	-0.472361	-0.26424	[-0.6318 , 0.4262]	[-0.5606 , 0.6158]	[-0.8083 , 0.4504]
O15162	Phospholipid scramblase 1 OS=Homo sapiens OX=9606 GN=PLSCR1 PE=1 SV=1	PLSCR1	6	155	6	1		cell death;cell organization and biogenesis;defense response;metabolic process;regulation of biological process;response to stimulus	cytosol;Golgi;membrane;nucleus	DNA binding;metal ion binding;protein binding;transporter activity			EGF/EGFR Signaling Pathway	6.6104 (df=5)	3.17042e-05	0.000198256	1	0.173832	0.0472451	0.197295	0.171296	0.189281	0.0537997	0.218312	0.190682	0.987359	0.00546741	0.00440931	0.0016489	0.00131744	1	0.0111528	-0.813687	-1.07328	1.22264	1.25942	-0.82484	-1.08444	1.21149	1.24827	-0.259595	2.03633	2.07311	2.29592	2.33271	0.0367817	[-0.8843 , 0.9066]	[-1.8094 , 0.182]	[-2.1386 , -0.0079]
O15164	Transcription intermediary factor 1-alpha OS=Homo sapiens OX=9606 GN=TRIM24 PE=1 SV=3	TRIM24	1	2	1	1		metabolic process;regulation of biological process;response to stimulus	cytoplasm;cytosol;nucleus	catalytic activity;DNA binding;metal ion binding;protein binding		Signaling by cytosolic FGFR1 fusion mutants; Signaling by BRAF and RAF fusions
O15173	Membrane-associated progesterone receptor component 2 OS=Homo sapiens OX=9606 GN=PGRMC2 PE=1 SV=1	PGRMC2	14	1096	11	1		regulation of biological process;response to stimulus	membrane	protein binding;receptor activity;signal transducer activity				1.9577 (df=5)	0.0935319	0.137532	0.983876	0.976139	0.569049	0.391922	0.977804	0.779029	0.26823	0.208325	0.999469	0.953817	0.740471	0.859203	0.978023	0.514863	0.325649	0.0779975	-0.0947397	-0.225549	-0.380641	0.143812	-0.172737	-0.303547	-0.458639	0.0658147	-0.130809	-0.285902	0.238552	-0.155092	0.369361	0.524454	[-0.2574 , 0.4134]	[-0.4677 , 0.2782]	[-0.6246 , 0.1735]
O15194	CTD small phosphatase-like protein OS=Homo sapiens OX=9606 GN=CTDSPL PE=1 SV=2	CTDSPL	3	9	2	1		metabolic process;regulation of biological process	nucleus	catalytic activity;metal ion binding;protein binding
O15211	Ral guanine nucleotide dissociation stimulator-like 2 OS=Homo sapiens OX=9606 GN=RGL2 PE=1 SV=1	RGL2	6	70	6	1		regulation of biological process;response to stimulus		protein binding	Ras signaling pathway			10.3123 (df=5)	1.03229e-07	1.73964e-06	0.999701	0.378483	1	0.960255	3.88511e-07	0.273922	0.999939	0.919461	1.13462e-06	0.552035	0.998472	7.56759e-09	0.968532	2.96685e-06	1.0063e-05	-0.0820039	0.608288	-0.00935149	0.401102	-2.95614	0.690292	0.0726524	0.483106	-2.87413	-0.617639	-0.207186	-3.56443	0.410453	-2.94679	-3.35724	[-0.8995 , 0.7355]	[-0.3007 , 1.5173]	[-0.982 , 0.9632]
O15212	Prefoldin subunit 6 OS=Homo sapiens OX=9606 GN=PFDN6 PE=1 SV=1	PFDN6	15	771	14	1	Methyl [K66]	cell organization and biogenesis;metabolic process	cytoplasm	catalytic activity;protein binding		Prefoldin mediated transfer of substrate to CCT/TriC		11.2573 (df=5)	2.65712e-08	5.57156e-07	1	0.805146	0.764898	6.24072e-08	0.309337	0.811242	0.798695	8.47149e-08	0.31447	0.217303	6.97144e-06	0.836903	1.24341e-08	0.0712056	0.0108174	-0.00488582	0.219922	-0.249115	1.7678	0.559095	0.224808	-0.244229	1.77268	0.563981	-0.469037	1.54787	0.339173	2.01691	0.80821	-1.2087	[-0.4626 , 0.4528]	[-0.2889 , 0.7288]	[-0.7936 , 0.2954]
O15213	WD repeat-containing protein 46 OS=Homo sapiens OX=9606 GN=WDR46 PE=1 SV=3	WDR46	10	180	10	1		metabolic process	nucleus	protein binding;RNA binding		Major pathway of rRNA processing in the nucleolus and cytosol; rRNA modification in the nucleus and cytosol		6.6789 (df=5)	2.83414e-05	0.000180618	0.890957	0.475975	0.947857	0.922912	0.000135916	0.0919474	0.507894	0.999277	1.53291e-05	0.980243	0.331474	0.0136823	0.67898	0.00370143	0.000469196	0.219692	-0.408386	-0.216972	0.344652	-1.65842	-0.628078	-0.436664	0.12496	-1.87811	0.191415	0.753038	-1.25003	0.561624	-1.44145	-2.00307	[-0.378 , 0.8174]	[-1.0729 , 0.2562]	[-0.928 , 0.4941]
O15217	Glutathione S-transferase A4 OS=Homo sapiens OX=9606 GN=GSTA4 PE=1 SV=1	GSTA4	6	65	6	1		metabolic process	cytoplasm;cytosol	catalytic activity;protein binding	Drug metabolism - cytochrome P450; Platinum drug resistance; Metabolism of xenobiotics by cytochrome P450; Chemical carcinogenesis; Glutathione metabolism	Glutathione conjugation	NRF2 pathway; Metapathway biotransformation	2.4482 (df=5)	0.0403679	0.0688718	0.999993	0.973327	0.997289	1	0.0327932	0.989385	0.993276	1	0.0296018	0.895752	0.998509	0.0132355	0.99923	0.122083	0.162596	0.0296799	0.184895	-0.12014	0.0239904	-1.15416	0.155215	-0.14982	-0.00568948	-1.18384	-0.305035	-0.160904	-1.33905	0.14413	-1.03402	-1.17815	[-0.6085 , 0.6678]	[-0.5247 , 0.8944]	[-0.8794 , 0.6391]
O15218	G-protein coupled receptor 182 OS=Homo sapiens OX=9606 GN=GPR182 PE=2 SV=1	GPR182	1	8	1	1		regulation of biological process;response to stimulus	membrane	receptor activity;signal transducer activity			Myometrial Relaxation and Contraction Pathways
O15226	NF-kappa-B-repressing factor OS=Homo sapiens OX=9606 GN=NKRF PE=1 SV=2	NKRF	12	89	12	1		metabolic process;regulation of biological process	nucleus	DNA binding;protein binding;RNA binding				0.5938 (df=5)	0.704734	0.74023	0.693455	0.997647	0.994267	0.823784	0.999264	0.960322	0.985427	0.999047	0.996428	0.999998	0.94852	1	0.969265	1	0.984599	0.247857	0.0848782	0.109688	0.357851	0.102894	-0.162978	-0.138169	0.109995	-0.144963	0.0248094	0.272973	0.0180154	0.248164	-0.00679402	-0.254958	[-0.2491 , 0.7448]	[-0.4677 , 0.6375]	[-0.4816 , 0.701]
O15228	Dihydroxyacetone phosphate acyltransferase OS=Homo sapiens OX=9606 GN=GNPAT PE=1 SV=1	GNPAT	6	34	6	1		cell organization and biogenesis;metabolic process;response to stimulus	membrane;mitochondrion;organelle lumen	catalytic activity;protein binding	Glycerophospholipid metabolism; Peroxisome	Synthesis of PA; Plasmalogen biosynthesis	Triacylglyceride Synthesis	6.2402 (df=5)	5.83504e-05	0.00032803	0.994453	0.887075	0.705713	0.999632	0.000165461	0.654205	0.449044	1	0.000654151	0.998895	0.93008	3.04854e-05	0.834134	1.75894e-05	0.0146249	-0.128352	0.287428	0.407764	-0.125169	-1.91224	0.41578	0.536117	0.00318322	-1.78389	0.120336	-0.412597	-2.19967	-0.532933	-2.32	-1.78707	[-0.8251 , 0.5684]	[-0.4873 , 1.0622]	[-0.4212 , 1.2367]
O15229	Kynurenine 3-monooxygenase OS=Homo sapiens OX=9606 GN=KMO PE=1 SV=2	KMO	4	18	4	1		metabolic process;response to stimulus	cytosol;membrane;mitochondrion	catalytic activity;nucleotide binding	Metabolic pathways; Tryptophan metabolism	Tryptophan catabolism	Selenium Micronutrient Network; NAD Biosynthesis II (from tryptophan)	3.0444 (df=3)	0.0354377	0.0619968	0.533818		0.429292	0.405427			0.0601295	0.885914					0.082658			-0.350945		0.452776	-0.670717			0.803721	-0.319771					-1.12349			[-1.0364 , 0.3345]		[-0.3316 , 1.2372]
O15230	Laminin subunit alpha-5 OS=Homo sapiens OX=9606 GN=LAMA5 PE=1 SV=8	LAMA5	101	3300	96	1	Methyl [K2451]	cell differentiation;cell organization and biogenesis;cell proliferation;cellular component movement;regulation of biological process;response to stimulus;transport	extracellular;membrane;nucleus	catalytic activity;motor activity;protein binding;structural molecule activity	Metabolic pathways; Pathways in cancer; Small cell lung cancer; Toxoplasmosis; Amoebiasis; PI3K-Akt signaling pathway; ECM-receptor interaction; Focal adhesion	ECM proteoglycans; Laminin interactions; Degradation of the extracellular matrix; MET activates PTK2 signaling; Interleukin-4 and 13 signaling; Non-integrin membrane-ECM interactions	Alpha 6 Beta 4 signaling pathway; Primary Focal Segmental Glomerulosclerosis FSGS; Focal Adhesion; Focal Adhesion-PI3K-Akt-mTOR-signaling pathway; Inflammatory Response Pathway	1.2427 (df=5)	0.296739	0.358079	0.775534	0.928324	0.965364	0.203266	1	0.999936	0.999713	0.653144	0.973597	0.999999	0.601641	0.991142	0.59067	0.995254	0.486151	0.155632	0.126604	0.113652	0.468069	-0.000367299	-0.0290276	-0.04198	0.312437	-0.155999	-0.0129523	0.341465	-0.126971	0.354417	-0.114019	-0.468436	[-0.1894 , 0.5007]	[-0.2571 , 0.5103]	[-0.2969 , 0.5242]
O15231-3	Isoform 3 of Zinc finger protein 185 OS=Homo sapiens OX=9606 GN=ZNF185	ZNF185	20	440	20	1			cytoplasm;cytoskeleton	metal ion binding;protein binding				3.7748 (df=5)	0.00395401	0.0103674	1	1	0.0163387	0.606758	0.830764	1	0.0213137	0.619947	0.838935	0.0461974	0.632708	0.87557	0.00689509	0.913392	0.269486	-0.000309293	-0.0147848	-0.828469	0.572656	-0.435562	-0.0144755	-0.82816	0.572965	-0.435253	-0.813685	0.587441	-0.420777	1.40113	0.392907	-1.00822	[-0.6123 , 0.6117]	[-0.6952 , 0.6657]	[-1.5566 , -0.1004]
O15234	Protein CASC3 OS=Homo sapiens OX=9606 GN=CASC3 PE=1 SV=2	CASC3	3	70	3	1		metabolic process;regulation of biological process;transport	cytoplasm;cytosol;membrane;nucleus	protein binding;RNA binding	mRNA surveillance pathway; RNA transport	mRNA 3'-end processing; mRNA Splicing - Major Pathway; Cleavage of Growing Transcript in the Termination Region ; Regulation of expression of SLITs and ROBOs; Transport of Mature mRNA derived from an Intron-Containing Transcript; Nonsense Mediated Decay (NMD) enhanced by the Exon Junction Complex (EJC)		3.8283 (df=5)	0.00368111	0.00977477	0.998528	0.71494	0.0694177	0.863858	0.0471082	0.904383	0.161031	0.745786	0.0898418	0.741238	0.365294	0.393877	0.0541955	0.953142	0.0260471	0.130828	0.506747	1.09242	-0.621651	1.6071	0.375919	0.961593	-0.752479	1.47628	0.585674	-1.1284	1.10036	-1.71407	0.514683	2.22875	[-0.8096 , 1.0713]	[-0.5354 , 1.5489]	[-0.0507 , 2.2355]
O15235	28S ribosomal protein S12, mitochondrial OS=Homo sapiens OX=9606 GN=MRPS12 PE=1 SV=1	MRPS12	5	111	5	1		cell organization and biogenesis;metabolic process	membrane;mitochondrion;ribosome	protein binding;RNA binding;structural molecule activity	Ribosome	Mitochondrial translation initiation; Mitochondrial translation elongation; Mitochondrial translation termination		2.4507 (df=5)	0.0401958	0.0686906	0.958631	0.0198348	0.638422	0.999999	0.999817	0.161791	0.964654	0.992807	0.999922	0.75352	0.305637	0.502297	0.892632	0.975694	0.999801	0.204993	0.88046	0.446541	-0.0355563	0.110597	0.675467	0.241549	-0.240549	-0.0943958	-0.433918	-0.916016	-0.769863	-0.482098	-0.335945	0.146153	[-0.5051 , 0.9151]	[0.0909 , 1.67]	[-0.3983 , 1.2914]
O15239	NADH dehydrogenase [ubiquinone] 1 alpha subcomplex subunit 1 OS=Homo sapiens OX=9606 GN=NDUFA1 PE=1 SV=1	NDUFA1	2	19	2	1		cell organization and biogenesis;metabolic process;transport	cytosol;membrane;mitochondrion	catalytic activity	Non-alcoholic fatty liver disease (NAFLD); Parkinson's disease; Metabolic pathways; Alzheimer's disease; Oxidative phosphorylation; Huntington's disease	Complex I biogenesis	Electron Transport Chain	2.8821 (df=5)	0.0194161	0.0378113	0.309613	0.865729	0.715995	0.370652	0.0125673	0.970499	0.998891	0.98256	0.284535	0.999466	0.84785	0.117392	0.943018	0.219784	0.86706	0.851677	0.501234	0.668199	1.31793	2.28906	-0.350442	-0.183478	0.466252	1.43738	0.166964	0.816695	1.78782	0.64973	1.62086	0.97113	[-0.3462 , 2.0495]	[-0.7908 , 1.7932]	[-0.7089 , 2.0453]
O15240	Neurosecretory protein VGF OS=Homo sapiens OX=9606 GN=VGF PE=1 SV=2	VGF	14	43	14	1		defense response;metabolic process;regulation of biological process;reproduction;response to stimulus;transport	extracellular;organelle lumen	protein binding		Post-translational protein phosphorylation; Regulation of Insulin-like Growth Factor (IGF) transport and uptake by Insulin-like Growth Factor Binding Proteins (IGFBPs)		6.4473 (df=5)	4.14456e-05	0.000248412	0.999333	0.994266	0.996243	0.999989	1.04507e-05	0.99992	0.972856	1	3.10465e-05	0.944326	0.999964	0.000113157	0.997432	1.47199e-05	0.00175658	-0.073196	-0.127694	0.124859	-0.0547574	-1.9536	-0.0544982	0.198055	0.0184386	-1.8804	0.252553	0.0729367	-1.82591	-0.179616	-2.07846	-1.89884	[-0.6922 , 0.5458]	[-0.816 , 0.5606]	[-0.6116 , 0.8613]
O15243	Leptin receptor gene-related protein OS=Homo sapiens OX=9606 GN=LEPROT PE=1 SV=1	LEPROT	2	9	2	1		regulation of biological process;transport	endosome;Golgi;membrane	protein binding
O15247	Chloride intracellular channel protein 2 OS=Homo sapiens OX=9606 GN=CLIC2 PE=1 SV=3	CLIC2	19	441	16	1	Met-loss+Acetyl [N-Term]	metabolic process;regulation of biological process;response to stimulus;transport	cytoplasm;membrane;nucleus	antioxidant activity;catalytic activity;protein binding;transporter activity		Ion homeostasis; Stimuli-sensing channels		1.4555 (df=5)	0.213296	0.270541	0.909011	0.673457	0.999988	1	0.253538	0.993844	0.921307	0.985191	0.618658	0.729894	0.919831	0.851849	1	0.285091	0.505764	-0.189905	-0.306965	0.0338668	0.0250063	-0.697663	-0.11706	0.223772	0.214912	-0.507758	0.340832	0.331972	-0.390698	-0.00886051	-0.73153	-0.72267	[-0.7316 , 0.3518]	[-0.9092 , 0.2953]	[-0.6105 , 0.6783]
O15254	Peroxisomal acyl-coenzyme A oxidase 3 OS=Homo sapiens OX=9606 GN=ACOX3 PE=1 SV=2	ACOX3	13	91	12	1	Met-loss+Acetyl [N-Term]	metabolic process	membrane;mitochondrion;organelle lumen	catalytic activity;nucleotide binding;protein binding	alpha-Linolenic acid metabolism; Peroxisome; Fatty acid metabolism; PPAR signaling pathway; Metabolic pathways; Biosynthesis of unsaturated fatty acids; Fatty acid degradation; cAMP signaling pathway	Beta-oxidation of pristanoyl-CoA	PPAR signaling pathway	3.1713 (df=5)	0.0114045	0.0245121	0.609009	0.685734	0.974736	0.0982905	0.760267	1	0.335314	0.538558	0.231911	0.398333	0.595244	0.258334	0.0486829	0.973236	0.0333498	0.42991	0.441824	-0.241894	1.22843	-0.62399	0.0119142	-0.671803	0.798516	-1.0539	-0.683718	0.786602	-1.06581	1.47032	-0.382097	-1.85242	[-0.3601 , 1.22]	[-0.4366 , 1.3202]	[-1.1818 , 0.698]
O15258	Protein RER1 OS=Homo sapiens OX=9606 GN=RER1 PE=1 SV=1	RER1	5	285	5	1	Met-loss+Acetyl [N-Term]	cell organization and biogenesis;regulation of biological process;transport	cell surface;Golgi;membrane	protein binding				3.2517 (df=5)	0.00990169	0.0218352	0.914377	0.999955	0.975454	0.273152	0.0432954	0.891653	0.633852	0.639047	0.185034	0.995808	0.265608	0.0462892	0.146246	0.0213174	0.988126	-0.147309	0.0323611	0.129811	-0.539331	-0.746019	0.17967	0.277119	-0.392022	-0.59871	0.0974495	-0.571692	-0.77838	-0.669141	-0.875829	-0.206688	[-0.5741 , 0.2795]	[-0.4422 , 0.5069]	[-0.3779 , 0.6375]
O15260	Surfeit locus protein 4 OS=Homo sapiens OX=9606 GN=SURF4 PE=1 SV=3	SURF4	7	620	7	1	Methyl [K22]	cell organization and biogenesis;regulation of biological process;transport	endoplasmic reticulum;Golgi;membrane	protein binding		COPI-dependent Golgi-to-ER retrograde traffic; Neutrophil degranulation		2.6554 (df=5)	0.0281535	0.0510653	0.998123	0.616655	0.342467	0.576362	0.0436436	0.856756	0.593422	0.744609	0.0894447	0.996372	0.991718	0.43936	0.999923	0.694066	0.908265	0.0678433	0.27809	0.380633	0.446006	0.80863	0.210246	0.31279	0.378163	0.740787	0.102543	0.167916	0.53054	0.065373	0.427997	0.362624	[-0.3952 , 0.5309]	[-0.2368 , 0.793]	[-0.1703 , 0.9315]
O15263	Beta-defensin 4A OS=Homo sapiens OX=9606 GN=DEFB4A PE=1 SV=1	DEFB4A; DEFB4B	2	11	2	1		defense response;regulation of biological process;response to stimulus	extracellular;organelle lumen	protein binding		Beta defensins		2.2217 (df=2)	0.121316	0.170693		0.252026		0.221527							0.775998						0.656304		1.13372							0.47742						[-0.3336 , 1.6462]
O15264	Mitogen-activated protein kinase 13 OS=Homo sapiens OX=9606 GN=MAPK13 PE=1 SV=1	MAPK13	10	154	9	1		metabolic process;regulation of biological process;response to stimulus	cytoplasm;cytosol;nucleus	catalytic activity;nucleotide binding;protein binding;signal transducer activity	Chagas disease (American trypanosomiasis); Leishmaniasis; Salmonella infection; GnRH signaling pathway; Epstein-Barr virus infection; Pertussis; Hepatitis C; Osteoclast differentiation; Adrenergic signaling in cardiomyocytes; Fc epsilon RI signaling pathway; Shigellosis; T cell receptor signaling pathway; Rap1 signaling pathway; Leukocyte transendothelial migration; Signaling pathways regulating …	NOD1/2 Signaling Pathway; DSCAM interactions; p38MAPK events; VEGFA-VEGFR2 Pathway	Regulation of toll-like receptor signaling pathway; Parkinsons Disease Pathway; Retinoblastoma (RB) in Cancer; Rac1/Pak1/p38/MMP-2 pathway; Photodynamic therapy-induced NFE2L2 (NRF2) survival signaling; MAPK Signaling Pathway; RIG-I-like Receptor Signaling; Angiopoietin Like Protein 8 Regulatory Pathway; Oxidative Damage; Insulin Signaling; Toll-like receptor signaling pathway	4.665 (df=5)	0.000839794	0.00292226	0.771769	0.0727053	0.999891	0.30838	0.00159497	0.645318	0.957105	0.789272	0.021307	0.285136	0.999798	0.279219	0.490285	0.00720989	0.657738	-0.184214	-0.428911	-0.0395294	-0.496846	-0.966194	-0.244697	0.144685	-0.312631	-0.78198	0.389381	-0.0679349	-0.537283	-0.457316	-0.926665	-0.469348	[-0.5906 , 0.2221]	[-0.8807 , 0.0229]	[-0.523 , 0.4439]
O15269	Serine palmitoyltransferase 1 OS=Homo sapiens OX=9606 GN=SPTLC1 PE=1 SV=1	SPTLC1	13	417	13	1		metabolic process	endoplasmic reticulum;membrane	catalytic activity;protein binding	Sphingolipid signaling pathway; Metabolic pathways; Sphingolipid metabolism	Sphingolipid de novo biosynthesis	Sphingolipid Metabolism	1.7429 (df=5)	0.133878	0.18502	0.180195	1	0.999693	0.921928	0.99995	0.342618	0.239158	0.998786	0.625695	0.99962	0.944299	0.999921	0.880528	1	0.941917	-0.272182	-0.00625231	0.0402609	-0.194101	0.0401675	0.265929	0.312443	0.0780811	0.312349	0.0465132	-0.187848	0.0464198	-0.234362	-9.34091e-05	0.234268	[-0.6077 , 0.0633]	[-0.3793 , 0.3668]	[-0.3589 , 0.4394]
O15270	Serine palmitoyltransferase 2 OS=Homo sapiens OX=9606 GN=SPTLC2 PE=1 SV=1	SPTLC2	12	165	12	1		metabolic process	endoplasmic reticulum;membrane;mitochondrion	catalytic activity	Sphingolipid signaling pathway; Sphingolipid metabolism; Metabolic pathways	Sphingolipid de novo biosynthesis	Sphingolipid Metabolism	6.3406 (df=5)	4.94154e-05	0.000285047	0.999994	0.999728	0.95457	0.985948	2.25639e-05	0.999983	0.933187	0.992521	4.02181e-05	0.909597	0.99764	0.000124101	0.853793	1.15646e-05	0.0101394	-0.0253725	-0.0612303	0.196536	-0.216552	-1.70361	-0.0358577	0.221909	-0.191179	-1.67824	0.257767	-0.155322	-1.64238	-0.413088	-1.90015	-1.48706	[-0.585 , 0.5343]	[-0.6835 , 0.561]	[-0.4693 , 0.8623]
O15294	UDP-N-acetylglucosamine--peptide N-acetylglucosaminyltransferase 110 kDa subunit OS=Homo sapiens OX=9606 GN=OGT PE=1 SV=3	OGT	23	360	23	1		cell death;cell organization and biogenesis;metabolic process;regulation of biological process;response to stimulus	cytoplasm;cytosol;membrane;mitochondrion;nucleus	catalytic activity;protein binding	Other types of O-glycan biosynthesis; Insulin resistance	HATs acetylate histones; UCH proteinases	Ectoderm Differentiation	0.8206 (df=5)	0.538448	0.589064	0.995599	0.917198	0.99977	0.83916	0.948541	0.995169	0.982807	0.94966	0.849901	0.882293	0.995307	0.691548	0.794279	0.987332	0.600116	-0.0949395	-0.206048	0.0612612	-0.379838	0.282602	-0.111108	0.156201	-0.284899	0.377542	0.267309	-0.17379	0.48865	-0.4411	0.221341	0.66244	[-0.6364 , 0.4466]	[-0.8081 , 0.396]	[-0.583 , 0.7055]
O15296	Polyunsaturated fatty acid lipoxygenase ALOX15B OS=Homo sapiens OX=9606 GN=ALOX15B PE=1 SV=3	ALOX15B	20	341	20	1	Methyl [K43]	cell death;metabolic process;regulation of biological process	cytoplasm;cytoskeleton;cytosol;membrane;nucleus	catalytic activity;metal ion binding;protein binding	Metabolic pathways; Serotonergic synapse; Arachidonic acid metabolism	Synthesis of 15-eicosatetraenoic acid derivatives	Selenium Micronutrient Network; Eicosanoid Synthesis	1.7017 (df=5)	0.143284	0.195649	0.998505	0.313923	0.985926	0.683412	0.999962	0.56881	0.999623	0.544887	1	0.857603	0.0920706	0.883903	0.482078	0.999878	0.794528	-0.093009	-0.524709	-0.178645	0.575889	-0.0755162	-0.4317	-0.0856362	0.668898	0.0174928	0.346064	1.1006	0.449193	0.754534	0.103129	-0.651405	[-0.7586 , 0.5726]	[-1.2648 , 0.2154]	[-0.9705 , 0.6132]
O15305	Phosphomannomutase 2 OS=Homo sapiens OX=9606 GN=PMM2 PE=1 SV=1	PMM2	12	344	10	1	Met-loss+Acetyl [N-Term]	metabolic process;transport	cytoplasm;cytosol;nucleus	catalytic activity;protein binding	Fructose and mannose metabolism; Amino sugar and nucleotide sugar metabolism; Metabolic pathways	Defective PMM2 causes PMM2-CDG (CDG-1a); Synthesis of GDP-mannose		2.8917 (df=5)	0.0186239	0.0365516	0.996393	0.843476	0.995951	0.399036	0.114298	0.979034	0.947937	0.261076	0.22161	0.69384	0.121539	0.522011	0.6955	0.0845016	0.0106877	-0.100159	-0.268796	0.122116	0.672024	-0.903587	-0.168637	0.222275	0.772182	-0.803429	0.390912	0.94082	-0.634791	0.549907	-1.0257	-1.57561	[-0.6961 , 0.4958]	[-0.9314 , 0.3938]	[-0.5868 , 0.8311]
O15321	Transmembrane 9 superfamily member 1 OS=Homo sapiens OX=9606 GN=TM9SF1 PE=2 SV=2	TM9SF1	5	73	5	1		metabolic process	membrane;vacuole					4.1975 (df=5)	0.00188942	0.00563769	0.220784	0.328955	0.999265	0.244108	0.0023469	1	0.659627	0.950446	0.114886	0.72347	0.958206	0.142598	0.459183	0.0124621	0.77115	-0.500618	-0.501671	-0.0925958	-0.838761	-1.49119	-0.00105308	0.408023	-0.338142	-0.990574	0.409076	-0.337089	-0.989521	-0.746165	-1.3986	-0.652432	[-1.1458 , 0.1445]	[-1.219 , 0.2156]	[-0.8601 , 0.6749]
O15327	Inositol polyphosphate 4-phosphatase type II OS=Homo sapiens OX=9606 GN=INPP4B PE=1 SV=4	INPP4B	11	104	11	1		metabolic process;regulation of biological process;response to stimulus	cytoplasm;cytosol	catalytic activity;protein binding	Inositol phosphate metabolism; Metabolic pathways; Phosphatidylinositol signaling system	Synthesis of PIPs at the plasma membrane; Synthesis of PIPs at the early endosome membrane; Synthesis of IP2, IP, and Ins in the cytosol	VEGFA-VEGFR2 Signaling Pathway	2.5191 (df=5)	0.0356969	0.0623457	0.0123987	0.7835	0.837771	0.723832	0.999981	0.527444	0.583343	0.992368	0.473903	1	0.994619	0.987464	0.99466	0.989932	0.931398	-0.759225	-0.321969	-0.316511	-0.53649	-0.064218	0.437256	0.442714	0.222735	0.695007	0.00545802	-0.214521	0.257751	-0.219979	0.252293	0.472272	[-1.4084 , -0.11]	[-1.0438 , 0.3998]	[-1.0888 , 0.4558]
O15335	Chondroadherin OS=Homo sapiens OX=9606 GN=CHAD PE=1 SV=2	CHAD	7	15	7	1		regulation of biological process;response to stimulus	cytoplasm;extracellular	enzyme regulator activity;protein binding	ECM-receptor interaction; PI3K-Akt signaling pathway; Focal adhesion		Focal Adhesion; Focal Adhesion-PI3K-Akt-mTOR-signaling pathway	3.1063 (df=5)	0.0127827	0.0268961	0.890453	0.0811105	0.35433	0.998432	0.0252507	0.532658	0.894744	0.99994	0.133264	0.996082	0.791493	0.765619	0.945803	0.566758	0.286077	0.346509	0.977716	0.765792	0.227963	1.7548	0.631207	0.419283	-0.118545	1.40829	-0.211924	-0.749753	0.777081	-0.537828	0.989005	1.52683	[-0.595 , 1.2881]	[-0.0692 , 2.0246]	[-0.3544 , 1.8859]
O15344	E3 ubiquitin-protein ligase Midline-1 OS=Homo sapiens OX=9606 GN=MID1 PE=1 SV=1	MID1	4	22	4	1		cell organization and biogenesis;regulation of biological process;response to stimulus	cytoplasm;cytoskeleton;cytosol	catalytic activity;metal ion binding;protein binding	Ubiquitin mediated proteolysis	Interferon gamma signaling		1.2604 (df=4)	0.29313	0.354689	0.960453	0.863246	0.996702	0.552599		0.995059	0.897784	0.332857		0.781911	0.259358		0.761547			-0.209128	-0.355065	0.126858	0.794168		-0.145937	0.335986	1.0033		0.481923	1.14923		0.667311			[-1.0704 , 0.6521]	[-1.3674 , 0.6572]	[-0.8854 , 1.1392]
O15347	High mobility group protein B3 OS=Homo sapiens OX=9606 GN=HMGB3 PE=1 SV=4	HMGB3	12	236	8	1		defense response;development;metabolic process;regulation of biological process;response to stimulus	chromosome;cytoplasm;nucleus	DNA binding;protein binding;RNA binding				0.7172 (df=5)	0.612275	0.655964	0.993206	0.999963	0.784684	0.949089	0.977994	0.999642	0.965867	0.837537	0.998714	0.912446	0.929424	0.992501	0.566832	0.999985	0.81517	0.0958091	0.036343	0.263806	-0.259193	0.213066	-0.0594661	0.167997	-0.355003	0.117257	0.227463	-0.295536	0.176723	-0.523	-0.0507404	0.472259	[-0.4021 , 0.5937]	[-0.5173 , 0.59]	[-0.3286 , 0.8562]
O15355	Protein phosphatase 1G OS=Homo sapiens OX=9606 GN=PPM1G PE=1 SV=1	PPM1G	15	434	15	1	Methyl [K104]	metabolic process;regulation of biological process	cytoplasm;membrane;nucleus	catalytic activity;metal ion binding;protein binding			mRNA Processing	1.1506 (df=5)	0.340535	0.400594	0.864597	0.933102	0.99826	0.502417	0.889456	1	0.762544	0.890145	0.998495	0.84516	0.887343	0.997844	0.415338	0.80264	0.995253	-0.141775	-0.131219	0.0624293	-0.374804	-0.230308	0.0105553	0.204204	-0.233029	-0.0885331	0.193649	-0.243585	-0.0990883	-0.437233	-0.292737	0.144496	[-0.5056 , 0.2221]	[-0.5358 , 0.2733]	[-0.3704 , 0.4953]
O15357	Phosphatidylinositol 3,4,5-trisphosphate 5-phosphatase 2 OS=Homo sapiens OX=9606 GN=INPPL1 PE=1 SV=2	INPPL1	18	285	16	1		cell organization and biogenesis;metabolic process;regulation of biological process;response to stimulus;transport	cytoplasm;cytoskeleton;cytosol;Golgi;membrane	catalytic activity;protein binding	Phosphatidylinositol signaling system; Fc gamma R-mediated phagocytosis; Insulin signaling pathway; Inositol phosphate metabolism; B cell receptor signaling pathway	Synthesis of IP3 and IP4 in the cytosol; Synthesis of PIPs at the plasma membrane; Interleukin receptor SHC signaling	EGF/EGFR Signaling Pathway; Insulin Signaling	10.1683 (df=5)	1.27406e-07	2.07518e-06	0.989742	0.999794	0.985268	0.999963	7.61255e-08	0.967092	0.999991	0.999983	2.35272e-08	0.961022	0.99929	6.4362e-07	0.999865	9.96911e-08	2.32267e-05	0.139381	-0.0685123	0.179596	0.0747304	-2.54103	-0.207894	0.0402144	-0.0646508	-2.68041	0.248108	0.143243	-2.47252	-0.104865	-2.72062	-2.61576	[-0.523 , 0.8018]	[-0.805 , 0.668]	[-0.6085 , 0.9677]
O15371	Eukaryotic translation initiation factor 3 subunit D OS=Homo sapiens OX=9606 GN=EIF3D PE=1 SV=1	EIF3D	23	1418	23	1	Methyl [K53]	cell organization and biogenesis;metabolic process;regulation of biological process	cytoplasm;cytosol;membrane	protein binding;RNA binding	RNA transport	Formation of the ternary complex, and subsequently, the 43S complex; L13a-mediated translational silencing of Ceruloplasmin expression; Translation initiation complex formation; GTP hydrolysis and joining of the 60S ribosomal subunit; Formation of a pool of free 40S subunits; Ribosomal scanning and start codon recognition	Translation Factors	1.2662 (df=5)	0.286301	0.347149	0.967487	0.988944	0.99948	0.894479	0.553371	0.785094	0.999447	0.661059	0.839011	0.962365	0.988787	0.365984	0.838626	0.76335	0.294331	-0.0794346	0.069254	-0.0389179	0.182067	-0.286506	0.148689	0.0405167	0.261502	-0.207071	-0.108172	0.112813	-0.35576	0.220985	-0.247588	-0.468573	[-0.3706 , 0.2118]	[-0.2545 , 0.393]	[-0.3854 , 0.3075]
O15372	Eukaryotic translation initiation factor 3 subunit H OS=Homo sapiens OX=9606 GN=EIF3H PE=1 SV=1	EIF3H	19	1141	19	1		cell organization and biogenesis;metabolic process;regulation of biological process	cytoplasm;cytosol;membrane	protein binding;RNA binding	Measles; RNA transport	Formation of the ternary complex, and subsequently, the 43S complex; L13a-mediated translational silencing of Ceruloplasmin expression; Translation initiation complex formation; GTP hydrolysis and joining of the 60S ribosomal subunit; Formation of a pool of free 40S subunits; Ribosomal scanning and start codon recognition	Translation Factors	1.1814 (df=5)	0.325364	0.386109	0.957059	0.945029	0.205234	0.968674	0.826592	0.999994	0.636984	0.999715	0.979775	0.773829	0.99996	0.990565	0.975371	0.999295	0.999457	0.137292	0.161995	0.442425	0.21874	0.337855	0.0247035	0.305133	0.0814482	0.200563	0.28043	0.0567447	0.175859	-0.223685	-0.10457	0.119115	[-0.3341 , 0.6087]	[-0.3621 , 0.6861]	[-0.1184 , 1.0032]
O15379	Histone deacetylase 3 OS=Homo sapiens OX=9606 GN=HDAC3 PE=1 SV=2	HDAC3	5	19	4	1		cell organization and biogenesis;metabolic process;regulation of biological process;response to stimulus	cytoplasm;cytosol;Golgi;membrane;nucleus	catalytic activity;protein binding	Alcoholism; Viral carcinogenesis; Thyroid hormone signaling pathway	NOTCH1 Intracellular Domain Regulates Transcription; Transcriptional regulation of white adipocyte differentiation; RORA activates gene expression; Activation of anterior HOX genes in hindbrain development during early embryogenesis; Constitutive Signaling by NOTCH1 HD+PEST Domain Mutants; PPARA activates gene expression; RUNX2 regulates osteoblast differentiation; Association of TriC/CCT with ta…	Cell Cycle; Neural Crest Differentiation; Initiation of transcription and translation elongation at the HIV-1 LTR	5.9534 (df=4)	0.000328955	0.00135081	0.374532	0.00179597	0.728956	0.959256		0.17176	0.0668952	0.995007		0.000293944	0.336872		0.611983			-0.700236	-1.75678	0.555307	-0.442544		-1.05655	1.25554	0.257691		2.31209	1.31424		-0.997851			[-1.7808 , 0.3803]	[-3.0105 , -0.5031]	[-0.6984 , 1.809]
O15381	Nuclear valosin-containing protein-like OS=Homo sapiens OX=9606 GN=NVL PE=1 SV=1	NVL	2	52	1	1		metabolic process;regulation of biological process;response to stimulus	membrane;nucleus	catalytic activity;nucleotide binding;protein binding;RNA binding	Ribosome biogenesis in eukaryotes			1.4709 (df=3)	0.231503	0.289521	0.387216		0.273226	0.712494			0.958955	0.999452					0.995805			0.438663		0.605823	0.491946			0.16716	0.0532826					-0.113877			[-0.2865 , 1.1638]		[-0.2728 , 1.4844]
O15382	Branched-chain-amino-acid aminotransferase, mitochondrial OS=Homo sapiens OX=9606 GN=BCAT2 PE=1 SV=2	BCAT2	15	381	15	1		metabolic process	cytoplasm;mitochondrion;organelle lumen	catalytic activity	Valine, leucine and isoleucine degradation; Valine, leucine and isoleucine biosynthesis; Metabolic pathways; Pantothenate and CoA biosynthesis; Cysteine and methionine metabolism; 2-Oxocarboxylic acid metabolism; Biosynthesis of amino acids	Branched-chain amino acid catabolism		5.5529 (df=5)	0.000184266	0.000843587	0.999999	0.451602	0.959734	0.0280284	0.0300713	0.438018	0.948475	0.0362506	0.0292202	0.968332	0.0012902	0.456173	0.0115863	0.191177	9.83044e-05	0.020087	-0.45494	-0.222409	1.20048	-1.19079	-0.475027	-0.242496	1.18039	-1.21088	0.232531	1.65542	-0.735854	1.42289	-0.968385	-2.39128	[-0.6317 , 0.6718]	[-1.1796 , 0.2697]	[-0.9978 , 0.553]
O15389	Sialic acid-binding Ig-like lectin 5 OS=Homo sapiens OX=9606 GN=SIGLEC5 PE=1 SV=1	SIGLEC5	3	9	3	1		transport	membrane	protein binding		Neutrophil degranulation; Immunoregulatory interactions between a Lymphoid and a non-Lymphoid cell		0.0733 (df=3)	0.973848	0.976927										0.98803	0.97489	0.996671	0.997502	0.999999	0.998292										0.185052	0.344648	0.172633	0.159596	-0.0124189	-0.172015
O15397	Importin-8 OS=Homo sapiens OX=9606 GN=IPO8 PE=1 SV=2	IPO8	12	93	11	1		regulation of biological process;response to stimulus;transport	cytoplasm;cytosol;nucleus	protein binding;transporter activity		Transcriptional regulation by small RNAs		4.89 (df=5)	0.000570028	0.00211787	0.350856	0.0197271	0.674484	0.994503	0.000559663	0.720398	0.999964	0.989165	0.0281734	0.722404	0.668525	0.288377	0.997427	0.0341057	0.0488075	-0.747305	-1.35193	-0.660072	-0.343754	-2.78039	-0.604621	0.0872335	0.403551	-2.03309	0.691855	1.00817	-1.42846	0.316317	-2.12032	-2.43664	[-1.837 , 0.3424]	[-2.5636 , -0.1403]	[-1.9565 , 0.6364]
O15400	Syntaxin-7 OS=Homo sapiens OX=9606 GN=STX7 PE=1 SV=4	STX7	19	1414	18	1	Methyl [K24; K55; K106; K138]; Met-loss+Acetyl [N-Term]	cell organization and biogenesis;regulation of biological process;transport	endosome;membrane;vacuole	protein binding	Phagosome; SNARE interactions in vesicular transport			2.2362 (df=5)	0.0582079	0.0926981	0.907842	0.999562	0.789286	0.992713	0.190449	0.835139	0.300111	1	0.052555	0.945554	0.976798	0.335663	0.753216	0.764089	0.23128	-0.11248	0.0385569	0.168307	-0.107175	0.439923	0.151037	0.280787	0.00530485	0.552403	0.129751	-0.145732	0.401366	-0.275483	0.271615	0.547098	[-0.4322 , 0.2073]	[-0.317 , 0.3941]	[-0.2121 , 0.5487]
O15403	Monocarboxylate transporter 7 OS=Homo sapiens OX=9606 GN=SLC16A6 PE=1 SV=2	SLC16A6	2	4	2	1		transport	membrane	transporter activity				3.2962 (df=5)	0.00977159	0.0216202	0.431858	0.817328	0.277428	0.928974	0.00441351	0.996913	0.993862	0.999999	0.0980502	0.935816	0.999953	0.0559636	0.997764	0.27754	0.281365	1.01941	0.72544	1.39268	0.928302	3.63987	-0.293971	0.373271	-0.0911091	2.62046	0.667242	0.202862	2.91443	-0.46438	2.24719	2.71157	[-0.581 , 2.6198]	[-0.9919 , 2.4428]	[-0.5099 , 3.2952]
O15427	Monocarboxylate transporter 4 OS=Homo sapiens OX=9606 GN=SLC16A3 PE=1 SV=1	SLC16A3	8	117	8	1		cellular component movement;metabolic process;transport	membrane	protein binding;RNA binding;transporter activity	Central carbon metabolism in cancer	Proton-coupled monocarboxylate transport; Basigin interactions; Pyruvate metabolism		4.917 (df=5)	0.000544226	0.00204001	0.999999	0.767645	0.987354	0.136702	0.00982752	0.832417	0.993911	0.164722	0.00959538	0.994199	0.630392	0.00116272	0.410432	0.00611138	0.000206383	-0.0211548	-0.331915	-0.171646	-0.961949	1.34339	-0.31076	-0.150491	-0.940795	1.36455	0.160269	-0.630035	1.67531	-0.790304	1.51504	2.30534	[-0.676 , 0.6337]	[-1.06 , 0.3962]	[-0.9507 , 0.6074]
O15431	High affinity copper uptake protein 1 OS=Homo sapiens OX=9606 GN=SLC31A1 PE=1 SV=1	SLC31A1	1	6	1	1		cellular homeostasis;response to stimulus;transport	cytoplasm;endosome;membrane	protein binding;transporter activity	Mineral absorption; Platinum drug resistance	Metal ion SLC transporters	Copper homeostasis	0.0077 (df=1)	0.931532	0.939515														0.931532															-0.0600868
O15438	ATP-binding cassette sub-family C member 3 OS=Homo sapiens OX=9606 GN=ABCC3 PE=1 SV=3	ABCC3	4	38	2	1		transport	membrane	catalytic activity;nucleotide binding;transporter activity	ABC transporters; Bile secretion; Antifolate resistance	ABC-family proteins mediated transport; Recycling of bile acids and salts	Fluoropyrimidine Activity; Codeine and Morphine Metabolism; Drug Induction of Bile Acid Pathway; Constitutive Androstane Receptor Pathway; NRF2 pathway; Nuclear Receptors in Lipid Metabolism and Toxicity; Photodynamic therapy-induced NFE2L2 (NRF2) survival signaling
O15439	ATP-binding cassette sub-family C member 4 OS=Homo sapiens OX=9606 GN=ABCC4 PE=1 SV=3	ABCC4	4	17	4	1		cell organization and biogenesis;metabolic process;regulation of biological process;response to stimulus;transport	membrane	catalytic activity;nucleotide binding;transporter activity	cAMP signaling pathway; Antifolate resistance; ABC transporters; Bile secretion	Platelet degranulation ; ABC-family proteins mediated transport	Fluoropyrimidine Activity; Drug Induction of Bile Acid Pathway; Ectoderm Differentiation; NRF2 pathway; Photodynamic therapy-induced NFE2L2 (NRF2) survival signaling; TYROBP Causal Network	0.7591 (df=4)	0.555418	0.604638	0.984834	0.731565	0.999984		0.945512	0.948357	0.984388		0.829772	0.783971		0.563903		0.970092		-0.203398	-0.521857	0.0414105		0.46718	-0.318459	0.244808		0.670577	0.563267		0.989037		0.425769		[-1.2942 , 0.8874]	[-1.7059 , 0.6622]	[-1.2291 , 1.3119]
O15446	DNA-directed RNA polymerase I subunit RPA34 OS=Homo sapiens OX=9606 GN=POLR1G PE=1 SV=1	CD3EAP	5	22	5	1		metabolic process;regulation of biological process;response to stimulus	chromosome;cytosol;mitochondrion;nucleus	catalytic activity;RNA binding		RNA Polymerase I Chain Elongation; NoRC negatively regulates rRNA expression; RNA Polymerase I Transcription Termination; RNA Polymerase I Promoter Escape; B-WICH complex positively regulates rRNA expression; RNA Polymerase I Transcription Initiation		5.6642 (df=5)	0.000160202	0.000753703	0.682814	0.0154169	0.999998	0.163411	0.121165	0.417154	0.776474	0.66373	0.0178559	0.050039	0.999895	0.000585643	0.205484	0.194008	0.00378879	0.441896	1.08821	-0.0365438	1.21323	-1.41165	0.646314	-0.478439	0.771334	-1.85354	-1.12475	0.12502	-2.49986	1.24977	-1.3751	-2.62488	[-0.4346 , 1.3184]	[0.1378 , 2.0387]	[-1.0535 , 0.9804]
O15455	Toll-like receptor 3 OS=Homo sapiens OX=9606 GN=TLR3 PE=1 SV=1	TLR3	1	6	1	1		cell death;defense response;metabolic process;regulation of biological process;response to stimulus	cell surface;cytoplasm;endoplasmic reticulum;endosome;membrane	protein binding;receptor activity;RNA binding;signal transducer activity	Herpes simplex infection; Influenza A; Hepatitis B; Hepatitis C; Toll-like receptor signaling pathway	TRAF3 deficiency - HSE; TICAM1-dependent activation of IRF3/IRF7; TLR3 deficiency - HSE; TLR3-mediated TICAM1-dependent programmed cell death; IRAK2 mediated activation of TAK1 complex upon TLR7/8 or 9 stimulation; TICAM1, RIP1-mediated IKK complex recruitment ; TRAF6-mediated induction of TAK1 complex within TLR4 complex; Trafficking and processing of endosomal TLR; RIP-mediated NFkB activation …	Regulation of toll-like receptor signaling pathway; Toll-like Receptor Signaling; Toll-like receptor signaling pathway
O15460	Prolyl 4-hydroxylase subunit alpha-2 OS=Homo sapiens OX=9606 GN=P4HA2 PE=1 SV=1	P4HA2	19	294	18	1		metabolic process	cytosol;endoplasmic reticulum;organelle lumen	catalytic activity;metal ion binding;protein binding	Arginine and proline metabolism; Metabolic pathways	Collagen biosynthesis and modifying enzymes	Amino Acid metabolism	1.0426 (df=5)	0.398305	0.45749	0.988685	0.999549	0.367547	1	1	0.95588	0.723995	0.999707	0.999215	0.323139	0.999824	0.999954	0.835835	0.805134	1	-0.108496	0.0612186	-0.405674	-0.0208258	-0.00118228	0.169715	-0.297177	0.0876703	0.107314	-0.466892	-0.0820443	-0.0624008	0.384848	0.404491	0.0196435	[-0.6132 , 0.3962]	[-0.4999 , 0.6223]	[-1.0061 , 0.1947]
O15479	Melanoma-associated antigen B2 OS=Homo sapiens OX=9606 GN=MAGEB2 PE=1 SV=3	MAGEB2	8	38	6	1				protein binding				2.26 (df=5)	0.0562535	0.0901761	0.972329	0.992022	0.994907	1	0.0670197	0.999998	0.999999	0.999433	0.0220386	1	0.999829	0.037027	0.999857	0.0501422	0.298205	0.2877	0.242073	0.241408	0.0507331	-1.79586	-0.0456264	-0.0462917	-0.236967	-2.08356	-0.00066526	-0.19134	-2.03794	-0.190675	-2.03727	-1.8466	[-0.8083 , 1.3837]	[-0.9745 , 1.4587]	[-1.0948 , 1.5776]
O15484	Calpain-5 OS=Homo sapiens OX=9606 GN=CAPN5 PE=1 SV=2	CAPN5	14	108	14	1		metabolic process;regulation of biological process;response to stimulus	cell surface;cytoplasm	catalytic activity;protein binding		Degradation of the extracellular matrix	Integrin-mediated Cell Adhesion	1.9166 (df=5)	0.100223	0.145632	0.850764	0.968435	0.950249	0.993454	0.325266	0.481684	0.46431	0.999996	0.757171	0.999995	0.911396	0.157354	0.888066	0.14872	0.860011	-0.237184	0.178485	0.212675	-0.194059	-0.713409	0.415669	0.449859	0.0431246	-0.476225	0.0341895	-0.372545	-0.891894	-0.406734	-0.926084	-0.51935	[-0.8297 , 0.3554]	[-0.4803 , 0.8373]	[-0.4923 , 0.9176]
O15488	Glycogenin-2 OS=Homo sapiens OX=9606 GN=GYG2 PE=1 SV=2	GYG2	7	82	1	1	Met-loss+Acetyl [N-Term]	metabolic process	cytosol;organelle lumen	catalytic activity	Metabolic pathways; Starch and sucrose metabolism	Glycogen storage disease type 0 (liver GYS2); Glycogen storage disease type IV (GBE1); Glycogen storage disease type II (GAA); Glycogen breakdown (glycogenolysis); Lysosomal glycogen catabolism; Glycogen synthesis; Myoclonic epilepsy of Lafora	Glycogen Metabolism	0.5857 (df=5)	0.710816	0.745448	0.992998	0.99888	0.998582	0.788999	1	0.953823	0.956069	0.932284	0.999701	1	0.688197	0.999808	0.694488	0.99972	0.926454	-0.146712	0.110845	0.124561	-0.575303	-0.0145074	0.257557	0.271273	-0.428591	0.132205	0.0137156	-0.686148	-0.125353	-0.699864	-0.139068	0.560795	[-0.9043 , 0.6108]	[-0.7315 , 0.9532]	[-0.7767 , 1.0258]
O15488-2	Isoform Beta of Glycogenin-2 OS=Homo sapiens OX=9606 GN=GYG2	GYG2	7	82	1	1	Met-loss+Acetyl [N-Term]	metabolic process	cytosol;organelle lumen	catalytic activity			Glycogen Metabolism
O15498	Synaptobrevin homolog YKT6 OS=Homo sapiens OX=9606 GN=YKT6 PE=1 SV=1	YKT6	13	823	13	1	Methyl [K96]	cell organization and biogenesis;transport	cytoplasm;cytosol;endoplasmic reticulum;endosome;Golgi;membrane;mitochondrion	catalytic activity;protein binding	SNARE interactions in vesicular transport	COPI-mediated anterograde transport; Intra-Golgi traffic; COPII (Coat Protein 2) Mediated Vesicle Transport		2.9777 (df=5)	0.0160194	0.0324073	0.979115	1	0.744349	0.14742	0.04397	0.9898	0.975523	0.342029	0.132072	0.822322	0.193364	0.0657316	0.727342	0.430675	0.998826	0.121917	0.0026423	0.276482	0.716525	0.863055	-0.119274	0.154565	0.594608	0.741138	0.273839	0.713883	0.860412	0.440043	0.586573	0.14653	[-0.3728 , 0.6166]	[-0.5474 , 0.5527]	[-0.3121 , 0.865]
O15504	Nucleoporin NUP42 OS=Homo sapiens OX=9606 GN=NUP42 PE=1 SV=1	NUPL2	3	63	3	1		cell organization and biogenesis;metabolic process;regulation of biological process;transport	cytosol;membrane;nucleus	metal ion binding;protein binding;RNA binding;transporter activity	RNA transport	Rev-mediated nuclear export of HIV RNA; ISG15 antiviral mechanism; NEP/NS2 Interacts with the Cellular Export Machinery; tRNA processing in the nucleus; Transcriptional regulation by small RNAs; Nuclear Pore Complex (NPC) Disassembly; Regulation of Glucokinase by Glucokinase Regulatory Protein; Vpr-mediated nuclear import of PICs; Regulation of HSF1-mediated heat shock response; snRNP Assembly; S…		8.2646 (df=5)	2.25678e-06	2.24687e-05	0.986887	0.999817	0.999998	0.881446	1.18625e-06	0.962778	0.998151	0.693733	3.36079e-07	0.999536	0.950547	7.98022e-06	0.886869	5.64821e-06	0.00522521	0.172311	-0.0783159	0.0337367	-0.500351	-2.6866	-0.250627	-0.138574	-0.672662	-2.85891	0.112053	-0.422035	-2.60828	-0.534087	-2.72033	-2.18625	[-0.6036 , 0.9482]	[-0.941 , 0.7843]	[-0.8893 , 0.9568]
O15511	Actin-related protein 2/3 complex subunit 5 OS=Homo sapiens OX=9606 GN=ARPC5 PE=1 SV=3	ARPC5	11	1248	10	1	Methyl [K3; K23; K60; K93; K131]; Met-loss+Acetyl [N-Term]	cell organization and biogenesis;cellular component movement;regulation of biological process;response to stimulus;transport	cytoplasm;cytoskeleton;cytosol;endosome;extracellular;organelle lumen	protein binding;structural molecule activity	Bacterial invasion of epithelial cells; Endocytosis; Salmonella infection; Fc gamma R-mediated phagocytosis; Regulation of actin cytoskeleton; Pathogenic Escherichia coli infection; Shigellosis	EPHB-mediated forward signaling; Neutrophil degranulation; Clathrin-mediated endocytosis; RHO GTPases Activate WASPs and WAVEs; Regulation of actin dynamics for phagocytic cup formation	Pathogenic Escherichia coli infection; Regulation of Actin Cytoskeleton	9.7675 (df=5)	2.30004e-07	3.36791e-06	0.000288825	0.455681	0.415132	1	0.00238777	0.263194	5.23083e-06	0.0970606	0.797933	0.0199458	0.848406	0.107283	0.852021	8.35764e-05	0.0340623	1.37584	0.617908	-0.684969	-0.0270177	2.05077	-0.757928	-2.0608	-1.40285	0.674933	-1.30288	-0.644926	1.43286	0.657951	2.73574	2.07779	[0.4874 , 2.2642]	[-0.3699 , 1.6057]	[-1.7419 , 0.372]
O15523	ATP-dependent RNA helicase DDX3Y OS=Homo sapiens OX=9606 GN=DDX3Y PE=1 SV=2	DDX3Y	44	3812	9	1	Methyl [K416; K562]	metabolic process;regulation of biological process	cytoplasm;cytosol;membrane;nucleus	catalytic activity;DNA binding;nucleotide binding;RNA binding			RIG-I-like Receptor Signaling	4.025 (df=5)	0.00255263	0.0072336	0.782356	0.994331	0.999999	0.999092	0.000791506	0.989819	0.923806	0.875004	0.0115277	0.999011	0.983508	0.00505404	0.998662	0.00290827	0.00814685	0.256049	0.117927	0.0212123	-0.123903	1.42979	-0.138122	-0.234837	-0.379953	1.17374	-0.0967147	-0.24183	1.31186	-0.145116	1.40858	1.55369	[-0.317 , 0.8291]	[-0.5193 , 0.7551]	[-0.6606 , 0.703]
O15525	Transcription factor MafG OS=Homo sapiens OX=9606 GN=MAFG PE=1 SV=1	MAFG	6	184	5	1		cellular homeostasis;coagulation;metabolic process;regulation of biological process;response to stimulus	nucleus	DNA binding;protein binding		Factors involved in megakaryocyte development and platelet production	Quercetin and Nf-kB/ AP-1 Induced Cell Apoptosis; NRF2 pathway	9.6698 (df=5)	2.65924e-07	3.81227e-06	0.337428	0.997783	0.999944	0.179932	1.45895e-07	0.764235	0.434773	0.849102	2.77005e-05	0.993146	0.364228	1.83723e-06	0.196343	6.44085e-07	0.0319777	-0.37021	-0.0899754	0.0453393	-0.742658	-1.99957	0.280235	0.415549	-0.372448	-1.62936	0.135315	-0.652683	-1.9096	-0.787998	-2.04491	-1.25691	[-0.9036 , 0.1632]	[-0.6831 , 0.5031]	[-0.5893 , 0.6799]
O15530	3-phosphoinositide-dependent protein kinase 1 OS=Homo sapiens OX=9606 GN=PDPK1 PE=1 SV=1	PDPK1	8	135	8	1		cell organization and biogenesis;cellular component movement;metabolic process;regulation of biological process;response to stimulus	cytoplasm;cytosol;membrane;nucleus	catalytic activity;enzyme regulator activity;nucleotide binding;protein binding	Choline metabolism in cancer; Toxoplasmosis; Neurotrophin signaling pathway; Insulin resistance; T cell receptor signaling pathway; Aldosterone-regulated sodium reabsorption; Focal adhesion; Prostate cancer; FoxO signaling pathway; Fc epsilon RI signaling pathway; AMPK signaling pathway; Non-small cell lung cancer; PI3K-Akt signaling pathway; Proteoglycans in cancer; PPAR signaling pathway; Hepat…	Downstream TCR signaling; Activation of AKT2; CTLA4 inhibitory signaling; G beta:gamma signalling through PI3Kgamma; Regulation of TP53 Degradation; Integrin alphaIIb beta3 signaling; FCERI mediated NF-kB activation; Constitutive Signaling by AKT1 E17K in Cancer; PIP3 activates AKT signaling; GPVI-mediated activation cascade; CD28 dependent PI3K/Akt signaling; VEGFR2 mediated vascular permeabilit…	MicroRNAs in cardiomyocyte hypertrophy; Integrin-mediated Cell Adhesion; Human Thyroid Stimulating Hormone (TSH) signaling pathway; Signaling Pathways in Glioblastoma; B Cell Receptor Signaling Pathway; Interleukin-11 Signaling Pathway; Brain-Derived Neurotrophic Factor (BDNF) signaling pathway; Cardiac Hypertrophic Response; Focal Adhesion; VEGFA-VEGFR2 Signaling Pathway; Angiopoietin Like Prote…	6.4318 (df=5)	4.25174e-05	0.000252852	0.999146	0.99511	0.147975	0.994348	3.72724e-05	0.999964	0.298813	0.976135	0.000109563	0.482273	0.96013	0.000336703	0.308928	0.03117	0.000635897	0.0749599	0.120116	0.604645	-0.191191	1.78947	0.0451556	0.529685	-0.266151	1.71451	0.484529	-0.311307	1.66935	-0.795836	1.18482	1.98066	[-0.5275 , 0.6775]	[-0.5498 , 0.79]	[-0.1121 , 1.3214]
O15533	Tapasin OS=Homo sapiens OX=9606 GN=TAPBP PE=1 SV=1	TAPBP	15	1564	15	1	Methyl [K40]	cell organization and biogenesis;metabolic process;regulation of biological process;response to stimulus;transport	endoplasmic reticulum;membrane	catalytic activity;protein binding;transporter activity	Antigen processing and presentation	ER-Phagosome pathway; Antigen Presentation: Folding, assembly and peptide loading of class I MHC		1.1035 (df=5)	0.364861	0.424218	0.439036	0.481021	0.999749	0.98716	0.884083	0.999997	0.81614	0.998101	1	0.809315	0.996533	1	0.998361	0.961648	0.999355	-0.258283	-0.276817	-0.046863	-0.154348	-0.260852	-0.0185344	0.21142	0.103934	-0.00256886	0.229954	0.122469	0.0159655	-0.107485	-0.213989	-0.106503	[-0.6652 , 0.1486]	[-0.7293 , 0.1756]	[-0.531 , 0.4373]
O15534	Period circadian protein homolog 1 OS=Homo sapiens OX=9606 GN=PER1 PE=1 SV=2	PER1	2	11	2	1		cell organization and biogenesis;metabolic process;regulation of biological process;response to stimulus	cytoplasm;cytosol;nucleus	DNA binding;protein binding	Herpes simplex infection; Circadian entrainment; Circadian rhythm	BMAL1:CLOCK,NPAS2 activates circadian gene expression	Melatonin metabolism and effects; Exercise-induced Circadian Regulation	1.0659 (df=4)	0.379535	0.438825	0.8776	1	0.754696	0.825358		0.919073	0.994603	0.491202		0.810239	0.841147		0.396519			-0.402853	-0.00761075	-0.608721	0.752523		0.395242	-0.205868	1.15538		-0.60111	0.760134		1.36124			[-1.5928 , 0.7871]	[-1.3088 , 1.2936]	[-2.0341 , 0.8166]
O15540	Fatty acid-binding protein, brain OS=Homo sapiens OX=9606 GN=FABP7 PE=1 SV=3	FABP7	12	503	11	1	Methyl [K10; K22; K38; K49; K91]; Met-loss+Acetyl [N-Term]	cell differentiation;cell proliferation;metabolic process;regulation of biological process;response to stimulus;transport	cytoplasm;cytosol;nucleus	transporter activity	PPAR signaling pathway	Triglyceride catabolism	PPAR signaling pathway	2.9983 (df=5)	0.0154494	0.0314549	0.915034	0.831951	0.120433	0.997643	0.919506	0.999692	0.0169288	0.999993	0.998633	0.0158282	0.999554	0.999956	0.321713	0.120125	0.998314	-0.337375	-0.450762	1.0204	-0.25821	-0.570954	-0.113388	1.35777	0.0791647	-0.233579	1.47116	0.192552	-0.120192	-1.27861	-1.59135	-0.312744	[-1.3167 , 0.642]	[-1.5397 , 0.6381]	[-0.1447 , 2.1855]
O15541	E3 ubiquitin-protein ligase RNF113A OS=Homo sapiens OX=9606 GN=RNF113A PE=1 SV=1	RNF113A	5	19	5	1		metabolic process	spliceosomal complex	metal ion binding;protein binding				2.4229 (df=5)	0.0426378	0.0721205	0.938866	0.991022	0.0646299	0.924447	0.990805	0.999906	0.383063	0.663642	0.865942	0.341692	0.786083	0.934574	0.0815157	0.177261	0.999712	0.347019	0.247064	1.22459	-0.608842	-0.374037	-0.0999549	0.877566	-0.955861	-0.721056	0.977521	-0.855906	-0.621101	-1.83343	-1.59862	0.234805	[-0.7485 , 1.4426]	[-0.9636 , 1.4578]	[-0.0438 , 2.493]
O15553	Pyrin OS=Homo sapiens OX=9606 GN=MEFV PE=1 SV=1	MEFV	2	2	2	1		defense response;regulation of biological process;response to stimulus	cytoplasm;cytoskeleton;cytosol;nucleus;vacuole	metal ion binding;protein binding	NOD-like receptor signaling pathway	The NLRP3 inflammasome	Nucleotide-binding Oligomerization Domain (NOD) pathway
O43143	Pre-mRNA-splicing factor ATP-dependent RNA helicase DHX15 OS=Homo sapiens OX=9606 GN=DHX15 PE=1 SV=2	DHX15	49	3450	48	1	Methyl [K277; K384; K463; K515; K760]	metabolic process;response to stimulus	cytoplasm;nucleus;spliceosomal complex	catalytic activity;nucleotide binding;protein binding;RNA binding	Spliceosome	mRNA Splicing - Major Pathway	mRNA Processing	4.5469 (df=5)	0.00103008	0.00344449	0.736444	0.728754	1	0.846409	0.00628586	0.99999	0.882135	0.999115	0.000483955	0.860562	0.999838	0.000619306	0.893831	0.0135145	0.00501243	-0.196276	-0.220276	-0.00640754	-0.286469	0.883463	-0.0240001	0.189869	-0.090193	1.07974	0.213869	-0.0661929	1.10374	-0.280062	0.889871	1.16993	[-0.61 , 0.2175]	[-0.6803 , 0.2398]	[-0.4986 , 0.4858]
O43148	mRNA cap guanine-N7 methyltransferase OS=Homo sapiens OX=9606 GN=RNMT PE=1 SV=1	RNMT	14	376	14	1		metabolic process	nucleus	catalytic activity;protein binding;RNA binding	mRNA surveillance pathway	RNA Pol II CTD phosphorylation and interaction with CE during HIV infection; RNA Pol II CTD phosphorylation and interaction with CE; mRNA Capping	mRNA Processing	1.0953 (df=5)	0.369257	0.428373	0.952981	0.496698	1	0.547209	0.999846	0.932258	0.986787	0.854012	0.99987	0.708372	0.995469	0.958877	0.654908	0.999958	0.880762	-0.198964	-0.448511	-0.0171034	-0.661458	-0.100555	-0.249547	0.181861	-0.462494	0.0984095	0.431408	-0.212947	0.347956	-0.644355	-0.0834515	0.560903	[-0.8675 , 0.4695]	[-1.1918 , 0.2948]	[-0.8124 , 0.7782]
O43149	Zinc finger ZZ-type and EF-hand domain-containing protein 1 OS=Homo sapiens OX=9606 GN=ZZEF1 PE=1 SV=6	ZZEF1	23	188	23	1				metal ion binding				5.525 (df=5)	0.000193155	0.000875434	0.36916	0.0506559	1	0.570642	0.000324474	0.877281	0.572964	0.996316	0.0175606	0.138512	0.999911	0.14507	0.63642	0.00101174	0.255169	-0.26222	-0.431366	0.00540428	-0.376321	-1.02553	-0.169146	0.267625	-0.1141	-0.763307	0.436771	0.0550458	-0.594161	-0.381725	-1.03093	-0.649207	[-0.6509 , 0.1264]	[-0.8635 , 7e-04]	[-0.457 , 0.4678]
O43150	Arf-GAP with SH3 domain, ANK repeat and PH domain-containing protein 2 OS=Homo sapiens OX=9606 GN=ASAP2 PE=1 SV=3	ASAP2	8	181	5	1		regulation of biological process	cytoplasm;Golgi;membrane	enzyme regulator activity;metal ion binding;protein binding	Fc gamma R-mediated phagocytosis; Endocytosis			7.9891 (df=5)	3.47108e-06	3.24005e-05	0.979121	0.00357485	0.452128	0.99279	2.49038e-05	0.0341487	0.838956	0.924777	0.000163586	0.627224	0.0546546	0.121138	0.535468	0.00711624	0.000441639	-0.283376	-1.6673	-0.85846	0.384535	-3.48384	-1.38392	-0.575084	0.667911	-3.20046	0.808839	2.05183	-1.81654	1.243	-2.62538	-3.86838	[-1.4333 , 0.8666]	[-2.9459 , -0.3887]	[-2.2265 , 0.5096]
O43156	TELO2-interacting protein 1 homolog OS=Homo sapiens OX=9606 GN=TTI1 PE=1 SV=3	TTI1	9	64	9	1		regulation of biological process	cytoplasm	protein binding	mTOR signaling pathway			4.3352 (df=5)	0.00148683	0.00465772	0.868752	0.998071	0.185481	0.260913	0.268494	0.727495	0.0224504	0.667035	0.0712454	0.494706	0.193665	0.480138	0.00888581	0.996479	0.0155995	-0.229606	0.0973706	0.570108	-0.759972	0.754416	0.326977	0.799715	-0.530366	0.984023	0.472737	-0.857343	0.657045	-1.33008	0.184308	1.51439	[-0.8239 , 0.3647]	[-0.5634 , 0.7582]	[-0.1369 , 1.2772]
O43157	Plexin-B1 OS=Homo sapiens OX=9606 GN=PLXNB1 PE=1 SV=3	PLXNB1	3	72	2	1		cell growth;cell organization and biogenesis;cellular component movement;regulation of biological process;response to stimulus	extracellular;membrane	enzyme regulator activity;protein binding;receptor activity;signal transducer activity	Axon guidance	Sema4D mediated inhibition of cell attachment and migration; G alpha (12/13) signalling events; Sema4D induced cell migration and growth-cone collapse
O43159	Ribosomal RNA-processing protein 8 OS=Homo sapiens OX=9606 GN=RRP8 PE=1 SV=2	RRP8	6	81	6	1		cell communication;cell organization and biogenesis;metabolic process;regulation of biological process;response to stimulus	cytosol;membrane;nucleus	catalytic activity;protein binding;RNA binding		SIRT1 negatively regulates rRNA expression		1.5525 (df=5)	0.182674	0.238244	0.898038	0.999758	0.927643	0.767102	0.508176	0.987002	0.471203	0.980576	0.874492	0.87625	0.883226	0.675783	0.439877	0.234883	0.999559	-0.258119	-0.0763542	0.281264	-0.55946	-0.732513	0.181765	0.539384	-0.301341	-0.474394	0.357619	-0.483106	-0.656159	-0.840725	-1.01378	-0.173053	[-0.9729 , 0.4566]	[-0.8711 , 0.7184]	[-0.5691 , 1.1316]
O43164	E3 ubiquitin-protein ligase Praja-2 OS=Homo sapiens OX=9606 GN=PJA2 PE=1 SV=4	PJA2	2	6	2	1		metabolic process;regulation of biological process;response to stimulus	cytoplasm;cytoskeleton;endoplasmic reticulum;Golgi;membrane	catalytic activity;metal ion binding;protein binding		Antigen processing: Ubiquitination & Proteasome degradation		2.4782 (df=2)	0.109265	0.156397											0.114884	0.977148			0.193389											1.88455	-0.199954			-2.08451
O43169	Cytochrome b5 type B OS=Homo sapiens OX=9606 GN=CYB5B PE=1 SV=3		8	385	7	1	Met-loss+Acetyl [N-Term]							3.8523 (df=5)	0.00345195	0.00929822	0.604642	0.999994	0.999986	0.99799	0.00184477	0.805762	0.858621	0.759312	0.037025	1	0.996243	0.00472812	0.99596	0.00692277	0.0123414	-0.296646	-0.0277374	-0.0348913	0.138432	-1.27726	0.268908	0.261754	0.435078	-0.980611	-0.00715382	0.16617	-1.24952	0.173324	-1.24237	-1.41569	[-0.8395 , 0.2462]	[-0.6313 , 0.5758]	[-0.6807 , 0.6109]
O43172	U4/U6 small nuclear ribonucleoprotein Prp4 OS=Homo sapiens OX=9606 GN=PRPF4 PE=1 SV=2	PRPF4	19	494	19	1		metabolic process	nucleus;spliceosomal complex	protein binding;RNA binding	Spliceosome	mRNA Splicing - Major Pathway	mRNA Processing	1.5907 (df=5)	0.171723	0.226389	0.999998	0.999777	0.996685	0.996901	0.127293	0.999143	0.998955	0.994712	0.11913	0.984911	0.999753	0.233428	0.975101	0.0969135	0.612507	0.0215442	-0.0598919	0.111972	-0.159198	-0.848246	-0.0814361	0.0904278	-0.180742	-0.86979	0.171864	-0.0993058	-0.788354	-0.27117	-0.960218	-0.689048	[-0.5485 , 0.5916]	[-0.6937 , 0.5739]	[-0.5662 , 0.7902]
O43175	D-3-phosphoglycerate dehydrogenase OS=Homo sapiens OX=9606 GN=PHGDH PE=1 SV=4	PHGDH	42	3837	42	1	Methyl [K8; K33; K58; K69; K91; K129; K289; K364; K380; K384; K394]	metabolic process	cytosol	catalytic activity;nucleotide binding	Carbon metabolism; Biosynthesis of amino acids; Metabolic pathways; Glycine, serine and threonine metabolism	Serine biosynthesis	Trans-sulfuration and one carbon metabolism	1.6589 (df=5)	0.153689	0.206722	0.866402	0.851743	0.681658	0.999979	0.969553	0.999992	0.182587	0.96302	0.712057	0.198886	0.950188	0.688715	0.968982	0.999926	0.997	0.269849	0.308796	-0.417787	-0.0699634	-0.320416	0.0389464	-0.687637	-0.339813	-0.590266	-0.726583	-0.378759	-0.629212	0.347824	0.0973709	-0.250453	[-0.4252 , 0.9649]	[-0.4641 , 1.0816]	[-1.2447 , 0.4092]
O43181	NADH dehydrogenase [ubiquinone] iron-sulfur protein 4, mitochondrial OS=Homo sapiens OX=9606 GN=NDUFS4 PE=1 SV=1	NDUFS4	6	343	6	1	Methyl [K73]	cell organization and biogenesis;metabolic process;regulation of biological process;response to stimulus;transport	membrane;mitochondrion	catalytic activity	Non-alcoholic fatty liver disease (NAFLD); Parkinson's disease; Metabolic pathways; Alzheimer's disease; Oxidative phosphorylation; Huntington's disease	Complex I biogenesis	Electron Transport Chain; Oxidative phosphorylation	1.9296 (df=5)	0.0980588	0.142935	1	0.996653	0.999657	0.38112	0.277153	0.998479	0.999306	0.373696	0.272175	0.983712	0.273439	0.19349	0.595038	0.479477	0.99999	0.013852	0.110449	-0.0736942	-0.68785	-0.75591	0.0965967	-0.0875463	-0.701702	-0.769762	-0.184143	-0.798299	-0.866359	-0.614156	-0.682216	-0.0680597	[-0.5866 , 0.6143]	[-0.5572 , 0.7781]	[-0.788 , 0.6407]
O43189-2	Isoform 1 of PHD finger protein 1 OS=Homo sapiens OX=9606 GN=PHF1	PHF1	6	65	6	1		cell organization and biogenesis;metabolic process;regulation of biological process;response to stimulus	cytoplasm;nucleus	metal ion binding;protein binding				2.9288 (df=5)	0.0174513	0.0346509	0.999795	1	0.999997	0.84828	0.0124378	0.999736	0.999998	0.776845	0.00886581	0.999989	0.886543	0.0224597	0.853825	0.0211314	0.52108	0.0524772	-0.0108881	0.027159	-0.389765	-1.13318	-0.0633653	-0.0253182	-0.442242	-1.18565	0.0380471	-0.378876	-1.12229	-0.416924	-1.16034	-0.743412	[-0.5124 , 0.6174]	[-0.639 , 0.6172]	[-0.6449 , 0.6992]
O43236	Septin-4 OS=Homo sapiens OX=9606 GN=SEPTIN4 PE=1 SV=1	44443	9	195	7	1		cell death;cell differentiation;cell division;cell organization and biogenesis;regulation of biological process	cytoplasm;cytoskeleton;mitochondrion;nucleus	catalytic activity;metal ion binding;nucleotide binding;protein binding;structural molecule activity	Apoptosis - multiple species; Apoptosis			2.9509 (df=5)	0.016789	0.0335549	0.825096	0.99932	0.856001	0.70112	0.137605	0.726627	0.285401	0.978879	0.0256095	0.974461	0.611257	0.269016	0.309753	0.622785	0.0369997	-0.159161	0.0501741	0.179216	-0.322468	0.557659	0.209335	0.338377	-0.163307	0.71682	0.129042	-0.372642	0.507485	-0.501684	0.378443	0.880127	[-0.5393 , 0.2209]	[-0.3724 , 0.4728]	[-0.273 , 0.6314]
O43237	Cytoplasmic dynein 1 light intermediate chain 2 OS=Homo sapiens OX=9606 GN=DYNC1LI2 PE=1 SV=1	DYNC1LI2	21	675	19	1	Methyl [K457]	cell organization and biogenesis;cellular component movement;response to stimulus;transport	chromosome;cytoplasm;cytoskeleton;cytosol;endosome;membrane;vacuole	catalytic activity;motor activity;nucleotide binding;protein binding	Phagosome; Vasopressin-regulated water reabsorption; Salmonella infection	COPI-independent Golgi-to-ER retrograde traffic; Amplification of signal from unattached kinetochores via a MAD2 inhibitory signal; Separation of Sister Chromatids; Resolution of Sister Chromatid Cohesion; RHO GTPases Activate Formins; COPI-mediated anterograde transport; MHC class II antigen presentation; HSP90 chaperone cycle for steroid hormone receptors (SHR)		1.5757 (df=5)	0.175938	0.231028	0.995985	0.584105	0.979668	0.786092	0.982131	0.344053	0.877814	0.919629	0.998692	0.977987	0.233987	0.561294	0.56308	0.87977	0.99723	-0.0509461	0.183597	0.0863508	-0.225953	-0.120968	0.234543	0.137297	-0.175007	-0.0700217	-0.097246	-0.40955	-0.304565	-0.312304	-0.207319	0.104985	[-0.3473 , 0.2454]	[-0.1459 , 0.5131]	[-0.2662 , 0.4389]
O43240	Kallikrein-10 OS=Homo sapiens OX=9606 GN=KLK10 PE=1 SV=3	KLK10	6	150	6	1		metabolic process	extracellular	catalytic activity				32.2569 (df=5)	4.01986e-18	4.19042e-15	0.292387	0.343297	0.808769	0.988571	1.10065e-10	0.999997	0.995833	0.991236	1.10088e-10	0.992809	0.987334	1.10102e-10	0.999922	1.10103e-10	1.1057e-10	-0.625354	-0.663737	-0.442112	-0.319654	-6.37507	-0.0383824	0.183242	0.3057	-5.74972	0.221625	0.344083	-5.71134	0.122458	-5.93296	-6.05542	[-1.49 , 0.2393]	[-1.6251 , 0.2976]	[-1.4708 , 0.5866]
O43242	26S proteasome non-ATPase regulatory subunit 3 OS=Homo sapiens OX=9606 GN=PSMD3 PE=1 SV=2	PSMD3	43	2720	42	1	Methyl [K76; K223; K385; K425; K440]	metabolic process;regulation of biological process;response to stimulus;transport	cytosol;extracellular;membrane;nucleus;organelle lumen;proteasome	catalytic activity;enzyme regulator activity;protein binding	Epstein-Barr virus infection; Proteasome	Regulation of RAS by GAPs; CDT1 association with the CDC6:ORC:origin complex; Downstream TCR signaling; UCH proteinases; NIK-->noncanonical NF-kB signaling; Hh mutants that don't undergo autocatalytic processing are degraded by ERAD; SCF-beta-TrCP mediated degradation of Emi1; Neutrophil degranulation; Cross-presentation of soluble exogenous antigens (endosomes); Separation of Sister Chromatids; …	Proteasome Degradation; Parkin-Ubiquitin Proteasomal System pathway	5.6329 (df=5)	0.000161002	0.000756491	0.835056	0.998476	0.96767	0.000317736	0.956876	0.700426	0.499792	2.78403e-05	0.99999	0.999029	0.00174396	0.895556	0.00597538	0.786006	0.00124941	-0.0897472	0.0339953	0.0706433	0.575884	-0.109029	0.123743	0.160391	0.665631	-0.019282	0.036648	0.541889	-0.143025	0.505241	-0.179673	-0.684913	[-0.3077 , 0.1282]	[-0.2083 , 0.2763]	[-0.1887 , 0.33]
O43251	RNA binding protein fox-1 homolog 2 OS=Homo sapiens OX=9606 GN=RBFOX2 PE=1 SV=3	RBFOX2	3	58	3	1		cell organization and biogenesis;cellular component movement;metabolic process;regulation of biological process;response to stimulus	cytoplasm;cytosol;nucleus	protein binding;RNA binding		FGFR2 alternative splicing		1.4399 (df=5)	0.218755	0.276264	0.999809	0.362173	0.995508	0.632443	0.999995	0.27974	0.979612	0.549204	0.999748	0.831162	0.99985	0.881582	0.87767	0.999943	0.882408	-0.0471071	0.383694	0.106466	0.463728	0.0388878	0.430801	0.153573	0.510835	0.0859948	-0.277227	0.0800342	-0.344806	0.357262	-0.0675786	-0.42484	[-0.5617 , 0.4675]	[-0.1816 , 0.949]	[-0.4984 , 0.7113]
O43252	Bifunctional 3'-phosphoadenosine 5'-phosphosulfate synthase 1 OS=Homo sapiens OX=9606 GN=PAPSS1 PE=1 SV=2	PAPSS1	29	654	26	1		metabolic process	cytosol	catalytic activity;nucleotide binding;protein binding	Sulfur metabolism; Purine metabolism; Metabolic pathways; Selenocompound metabolism	Transport and synthesis of PAPS; Signaling by BRAF and RAF fusions; Metabolism of ingested H2SeO4 and H2SeO3 into H2Se	Sulfation Biotransformation Reaction	1.3621 (df=5)	0.246995	0.306101	0.989351	0.628063	0.902955	0.999597	0.985637	0.324019	0.995828	1	0.913961	0.223773	0.808177	0.999453	0.998942	0.795645	0.975093	-0.0812048	0.227301	-0.162345	-0.0700204	0.148836	0.308505	-0.0811407	0.0111844	0.23004	-0.389646	-0.297321	-0.078465	0.0923251	0.311181	0.218856	[-0.464 , 0.3016]	[-0.1983 , 0.6529]	[-0.6177 , 0.293]
O43264	Centromere/kinetochore protein zw10 homolog OS=Homo sapiens OX=9606 GN=ZW10 PE=1 SV=3	ZW10	12	266	12	1	Met-loss+Acetyl [N-Term]	cell division;cell organization and biogenesis;regulation of biological process;transport	chromosome;cytoplasm;cytoskeleton;cytosol;endoplasmic reticulum;membrane;nucleus	DNA binding;protein binding		COPI-dependent Golgi-to-ER retrograde traffic; Amplification of signal from unattached kinetochores via a MAD2 inhibitory signal; Separation of Sister Chromatids; Resolution of Sister Chromatid Cohesion; RHO GTPases Activate Formins		5.1238 (df=5)	0.000381941	0.00152546	0.870676	0.943649	0.513793	0.955215	0.00145215	0.999999	0.107562	0.999953	0.0140588	0.192432	0.999842	0.0168627	0.405728	7.33842e-05	0.144404	-0.284197	-0.255349	0.522216	-0.372799	-1.76789	0.0288485	0.806413	-0.0886015	-1.4837	0.777565	-0.11745	-1.51254	-0.895015	-2.29011	-1.39509	[-1.0228 , 0.4544]	[-1.0766 , 0.5659]	[-0.3565 , 1.4009]
O43278	Kunitz-type protease inhibitor 1 OS=Homo sapiens OX=9606 GN=SPINT1 PE=1 SV=2	SPINT1	3	14	3	1		cell organization and biogenesis;regulation of biological process;response to stimulus	extracellular;membrane	enzyme regulator activity;protein binding	Transcriptional misregulation in cancer	MET Receptor Activation; Signaling by MST1		0.2583 (df=5)	0.934455	0.941942	0.94108	1	0.999995	1	0.990826	0.973686	0.988837	0.992275	0.999997	0.999999	1	0.993561	0.999995	0.996551	0.995454	0.26129	0.00875195	0.0434248	-0.0246376	0.322258	-0.252538	-0.217865	-0.285927	0.0609689	0.0346728	-0.0333896	0.313506	-0.0680624	0.278834	0.346896	[-0.5705 , 1.0931]	[-0.9352 , 0.9527]	[-0.9461 , 1.033]
O43281	Embryonal Fyn-associated substrate OS=Homo sapiens OX=9606 GN=EFS PE=1 SV=1	EFS	2	6	2	1		regulation of biological process;response to stimulus	cytoplasm	protein binding				6.9817 (df=2)	0.00569612	0.0139146											0.932261	0.0044472			0.0369978											-0.297677	-3.08083			-2.78315
O43283	Mitogen-activated protein kinase kinase kinase 13 OS=Homo sapiens OX=9606 GN=MAP3K13 PE=1 SV=1	MAP3K13	2	17	1	1		metabolic process;regulation of biological process;response to stimulus	cytoplasm;membrane	catalytic activity;metal ion binding;nucleotide binding;protein binding;signal transducer activity	MAPK signaling pathway		MAPK Signaling Pathway; Angiopoietin Like Protein 8 Regulatory Pathway; Insulin Signaling	1.8465 (df=5)	0.112711	0.160666	0.788212	0.972188	0.684053	0.685032	0.996653	0.427377	0.999024	0.252465	0.999809	0.363899	0.939568	0.937279	0.205154	0.996174	0.663969	0.790348	-0.521786	1.0693	-1.54052	0.506317	-1.31213	0.278953	-2.33087	-0.284031	1.59109	-1.01874	1.0281	-2.60983	-0.562985	2.04684	[-0.9933 , 2.574]	[-2.505 , 1.4614]	[-1.0528 , 3.1914]
O43290	U4/U6.U5 tri-snRNP-associated protein 1 OS=Homo sapiens OX=9606 GN=SART1 PE=1 SV=1	SART1	26	657	25	1		cell organization and biogenesis;metabolic process;regulation of biological process;response to stimulus	cytoplasm;cytosol;Golgi;nucleus;spliceosomal complex	protein binding;RNA binding	Spliceosome	mRNA Splicing - Major Pathway		4.4655 (df=5)	0.00118596	0.00387509	0.783351	0.999816	0.309931	0.847723	0.0228404	0.950859	0.0319922	0.405133	0.00251119	0.297014	0.795417	0.0225863	0.999875	0.579566	0.625188	0.339239	0.0768411	-0.643702	-0.525183	-1.43289	-0.262397	-0.982941	-0.864421	-1.77213	-0.720543	-0.602024	-1.50974	0.118519	-0.789192	-0.907712	[-0.4211 , 1.0996]	[-0.7686 , 0.9223]	[-1.5483 , 0.2609]
O43292	Glycosylphosphatidylinositol anchor attachment 1 protein OS=Homo sapiens OX=9606 GN=GPAA1 PE=1 SV=3	GPAA1	11	233	10	1		cell organization and biogenesis;metabolic process	endoplasmic reticulum;membrane	catalytic activity;protein binding	Glycosylphosphatidylinositol (GPI)-anchor biosynthesis; Metabolic pathways	Attachment of GPI anchor to uPAR		4.2158 (df=5)	0.00183	0.00549302	0.977674	0.999999	0.997999	0.85678	0.000437566	0.993591	0.999976	0.979065	0.00236949	0.999536	0.901158	0.00115873	0.968459	0.00364914	0.135191	-0.178524	-0.0229841	-0.126044	-0.484473	-1.84879	0.15554	0.0524804	-0.305949	-1.67027	-0.10306	-0.461489	-1.82581	-0.358429	-1.72275	-1.36432	[-0.892 , 0.535]	[-0.8163 , 0.7703]	[-0.9749 , 0.7228]
O43293	Death-associated protein kinase 3 OS=Homo sapiens OX=9606 GN=DAPK3 PE=1 SV=1	DAPK3	4	21	4	1		cell death;cell differentiation;cell organization and biogenesis;metabolic process;regulation of biological process;response to stimulus	cytoplasm;membrane;nucleus	catalytic activity;nucleotide binding;protein binding	Pathways in cancer; Bladder cancer	Ligand-independent caspase activation via DCC	Bladder Cancer	6.0447 (df=5)	8.21727e-05	0.000435134	0.554752	0.450009	0.999931	0.999424	3.92242e-05	0.999529	0.615545	0.789087	0.00126986	0.506026	0.69808	0.00369026	0.999979	8.2278e-05	0.000724431	-0.521477	-0.636484	0.0805828	0.179217	-2.97095	-0.115008	0.60206	0.700694	-2.44947	0.717067	0.815702	-2.33446	0.0986346	-3.05153	-3.15017	[-1.4323 , 0.3893]	[-1.6492 , 0.3762]	[-1.003 , 1.1641]
O43294	Transforming growth factor beta-1-induced transcript 1 protein OS=Homo sapiens OX=9606 GN=TGFB1I1 PE=1 SV=2	TGFB1I1	12	182	12	1	Acetyl [N-Term]	cell differentiation;metabolic process;regulation of biological process;response to stimulus	cytoplasm;cytoskeleton;nucleus	metal ion binding;protein binding			Androgen receptor signaling pathway; Serotonin Transporter Activity; TGF-beta Signaling Pathway; Monoamine Transport	0.6593 (df=5)	0.655254	0.695677	0.99929	0.955289	0.986812	0.890688	0.994447	0.864936	0.94113	0.805743	0.999467	0.999993	0.996356	0.903309	0.992308	0.942023	0.815974	-0.0720045	0.196558	0.159044	0.379398	-0.19005	0.268563	0.231049	0.451402	-0.118046	-0.0375138	0.18284	-0.386608	0.220353	-0.349094	-0.569448	[-0.6732 , 0.5292]	[-0.4719 , 0.865]	[-0.5562 , 0.8743]
O43299	AP-5 complex subunit zeta-1 OS=Homo sapiens OX=9606 GN=AP5Z1 PE=1 SV=2	AP5Z1	6	79	6	1		metabolic process;response to stimulus;transport	cytoplasm;nucleus	protein binding				2.421 (df=5)	0.0423195	0.0717318	0.995248	0.683961	0.999899	0.105265	1	0.422843	0.986383	0.213835	0.999896	0.906447	0.0132658	0.927311	0.116671	0.999942	0.372171	-0.1312	0.4125	0.0704112	-1.13188	-0.0276778	0.5437	0.201611	-1.00068	0.103522	-0.342089	-1.54438	-0.440178	-1.20229	-0.098089	1.1042	[-0.8674 , 0.605]	[-0.406 , 1.231]	[-0.8054 , 0.9462]
O43301	Heat shock 70 kDa protein 12A OS=Homo sapiens OX=9606 GN=HSPA12A PE=1 SV=2	HSPA12A	27	564	24	1				nucleotide binding		Regulation of HSF1-mediated heat shock response		10.5243 (df=5)	7.58664e-08	1.31184e-06	0.301244	0.962914	0.924904	1	2.18059e-07	0.104006	0.0948676	0.831996	4.64185e-05	0.999967	0.995994	9.39184e-08	0.989193	1.10967e-07	8.53249e-05	-0.25157	0.109699	0.139303	0.000871877	-1.29568	0.361269	0.390873	0.252442	-1.04411	0.0296039	-0.108827	-1.40537	-0.138431	-1.43498	-1.29655	[-0.6023 , 0.0991]	[-0.2802 , 0.4996]	[-0.2779 , 0.5565]
O43312	Protein MTSS 1 OS=Homo sapiens OX=9606 GN=MTSS1 PE=1 SV=2	MTSS1	3	27	3	1		cell differentiation;cell organization and biogenesis;cell proliferation;cellular component movement;regulation of biological process;response to stimulus	cytoplasm;cytoskeleton	protein binding				7.8212 (df=5)	4.78317e-06	4.20147e-05	0.996668	0.689216	0.857013	0.999077	1.61267e-05	0.920314	0.97881	0.987106	6.97871e-06	0.99996	0.806551	1.05694e-06	0.885177	3.62488e-06	0.00387619	0.153026	0.508952	0.429488	-0.197345	-2.81951	0.355926	0.276462	-0.350372	-2.97253	-0.0794642	-0.706297	-3.32846	-0.626833	-3.24899	-2.62216	[-0.7735 , 1.0796]	[-0.5074 , 1.5253]	[-0.657 , 1.516]
O43314	Inositol hexakisphosphate and diphosphoinositol-pentakisphosphate kinase 2 OS=Homo sapiens OX=9606 GN=PPIP5K2 PE=1 SV=3	PPIP5K2	20	184	13	1		metabolic process	cytoplasm;cytosol	catalytic activity;nucleotide binding	Phosphatidylinositol signaling system	Synthesis of pyrophosphates in the cytosol		2.7296 (df=5)	0.024733	0.0459112	0.834524	0.0453229	0.992597	0.795024	0.997879	0.461533	0.639994	0.992614	0.870044	0.0387517	0.990532	0.232666	0.632585	1	0.771576	0.395213	1.07992	-0.223618	0.721909	-0.247298	0.684703	-0.618831	0.326695	-0.642512	-1.30353	-0.358008	-1.32722	0.945527	-0.0236803	-0.969207	[-0.5637 , 1.3542]	[0.0137 , 2.1461]	[-1.3645 , 0.9172]
O43318	Mitogen-activated protein kinase kinase kinase 7 OS=Homo sapiens OX=9606 GN=MAP3K7 PE=1 SV=1	MAP3K7	4	41	3	1		cell death;cell organization and biogenesis;metabolic process;regulation of biological process;response to stimulus	cytoplasm;cytosol;membrane;nucleus	catalytic activity;metal ion binding;nucleotide binding;protein binding;signal transducer activity	RIG-I-like receptor signaling pathway; Adherens junction; MAPK signaling pathway; NOD-like receptor signaling pathway; Toll-like receptor signaling pathway; Wnt signaling pathway; Epstein-Barr virus infection; T cell receptor signaling pathway; NF-kappa B signaling pathway; Herpes simplex infection; Leishmaniasis; Measles; Osteoclast differentiation; AMPK signaling pathway; TNF signaling pathway;…	Downstream TCR signaling; NOD1/2 Signaling Pathway; TRAF6-mediated induction of TAK1 complex within TLR4 complex; TAK1 activates NFkB by phosphorylation and activation of IKKs complex; TNFR1-induced NFkappaB signaling pathway; Activated TLR4 signalling; Interleukin-1 family signaling; activated TAK1 mediates p38 MAPK activation; TICAM1,TRAF6-dependent induction of TAK1 complex; IRAK2 mediated act…	Regulation of toll-like receptor signaling pathway; IL-1 signaling pathway; RANKL/RANK (Receptor activator of NFKB (ligand)) Signaling Pathway; TNF related weak inducer of apoptosis (TWEAK) Signaling Pathway; IL17 signaling pathway; B Cell Receptor Signaling Pathway; TNF alpha Signaling Pathway; EBV LMP1 signaling; Structural Pathway of Interleukin 1 (IL-1); Cardiac Hypertrophic Response; NLR Pro…	4.3427 (df=4)	0.00316194	0.00867393	0.137714	0.795361	0.994289	0.0606396		0.0194668	0.542556	0.678249		0.684742	0.0134461		0.171555			-0.524209	0.27683	-0.106794	-1.03523		0.801039	0.417415	-0.511019		-0.383624	-1.31206		-0.928434			[-1.1446 , 0.0962]	[-0.413 , 0.9667]	[-0.8449 , 0.6313]
O43324	Eukaryotic translation elongation factor 1 epsilon-1 OS=Homo sapiens OX=9606 GN=EEF1E1 PE=1 SV=1	EEF1E1	11	545	10	1	Met-loss+Acetyl [N-Term]; Methyl [K12]	metabolic process;regulation of biological process	cytoplasm;cytosol;nucleus	catalytic activity;protein binding		Cytosolic tRNA aminoacylation; SeMet incorporation into proteins		2.7992 (df=5)	0.0219	0.0417134	0.997677	0.255063	0.963331	0.0834328	1	0.133416	0.853479	0.0478992	0.999958	0.876924	0.820189	0.724162	0.359751	0.991993	0.279649	-0.0671366	0.365222	0.146281	0.699234	-0.0157482	0.432359	0.213418	0.766371	0.0513884	-0.218941	0.334012	-0.380971	0.552953	-0.162029	-0.714982	[-0.5054 , 0.3711]	[-0.122 , 0.8525]	[-0.3751 , 0.6676]
O43361	Zinc finger protein 749 OS=Homo sapiens OX=9606 GN=ZNF749 PE=1 SV=2	ZNF749	2	20	1	1		metabolic process;regulation of biological process	nucleus	DNA binding;metal ion binding		Generic Transcription Pathway		3.7565 (df=4)	0.0097449	0.0215853						0.996234	0.999878	0.777192	0.0120902	0.991048	0.667575	0.0321913	0.869747	0.0164398	0.00611381						0.169599	-0.0748052	-0.760006	2.43817	-0.244404	-0.929605	2.26858	-0.6852	2.51298	3.19818
O43390	Heterogeneous nuclear ribonucleoprotein R OS=Homo sapiens OX=9606 GN=HNRNPR PE=1 SV=1	HNRNPR	38	4996	2	1	Methyl [K103; K187; K224; K255; K268; K285; K359; K584]	metabolic process;regulation of biological process	cytoplasm;endoplasmic reticulum;nucleus;spliceosomal complex	protein binding;RNA binding		mRNA Splicing - Major Pathway	mRNA Processing	5.5628 (df=5)	0.000181215	0.000833184	0.148375	0.147751	0.611372	0.41387	0.213267	0.999883	0.997034	0.0182427	0.00561514	0.986881	0.0165858	0.00529422	0.0731165	0.0283942	0.999666	-0.371069	-0.41291	-0.284272	0.489937	0.590631	-0.0418411	0.086797	0.861007	0.9617	0.128638	0.902848	1.00354	0.77421	0.874903	0.100694	[-0.8112 , 0.069]	[-0.9023 , 0.0764]	[-0.8079 , 0.2393]
O43390-2	Isoform 2 of Heterogeneous nuclear ribonucleoprotein R OS=Homo sapiens OX=9606 GN=HNRNPR	HNRNPR	37	4673	1	1	Methyl [K103; K187; K224; K255; K268; K362; K587]	metabolic process;regulation of biological process	endoplasmic reticulum;spliceosomal complex	protein binding;RNA binding			mRNA Processing
O43395	U4/U6 small nuclear ribonucleoprotein Prp3 OS=Homo sapiens OX=9606 GN=PRPF3 PE=1 SV=2	PRPF3	14	466	14	1		cell organization and biogenesis;metabolic process	cytosol;nucleus;spliceosomal complex	protein binding;RNA binding	Spliceosome	mRNA Splicing - Major Pathway	mRNA Processing	1.8095 (df=5)	0.119874	0.169159	0.942169	0.864953	0.168902	0.876714	0.998872	0.999633	0.609634	0.588963	0.999991	0.831638	0.501762	0.999429	0.118116	0.843867	0.859228	0.130139	0.180048	0.406716	-0.271042	0.0940396	0.0499089	0.276577	-0.401182	-0.0360996	0.226668	-0.451091	-0.0860085	-0.677758	-0.312676	0.365082	[-0.2857 , 0.546]	[-0.2824 , 0.6425]	[-0.0881 , 0.9015]
O43396	Thioredoxin-like protein 1 OS=Homo sapiens OX=9606 GN=TXNL1 PE=1 SV=3	TXNL1	17	1160	16	1		cellular homeostasis;metabolic process;regulation of biological process;response to stimulus;transport	cytoplasm;cytosol;nucleus;proteasome	antioxidant activity;catalytic activity				3.452 (df=5)	0.00696509	0.0163791	0.999964	0.994713	0.999961	0.344237	0.0253618	0.983565	0.99934	0.300016	0.03853	0.999784	0.610741	0.0155014	0.511438	0.034663	0.00193001	0.0222772	-0.0692694	-0.0270314	-0.404444	0.636534	-0.0915467	-0.0493086	-0.426722	0.614257	0.042238	-0.335175	0.705804	-0.377413	0.663566	1.04098	[-0.3194 , 0.364]	[-0.4492 , 0.3107]	[-0.4336 , 0.3795]
O43399	Tumor protein D54 OS=Homo sapiens OX=9606 GN=TPD52L2 PE=1 SV=2	TPD52L2	16	1212	4	1	Methyl [K55; K90]; Acetyl [N-Term]	regulation of biological process	cytoplasm	protein binding;RNA binding				8.7412 (df=5)	1.08083e-06	1.24202e-05	0.0137945	7.65073e-06	0.0703321	0.98798	0.000144882	0.193613	1	0.776238	0.0867106	0.306743	0.0768134	0.873344	0.836988	0.117978	0.0281959	-0.454677	-0.814791	-0.445845	-0.146856	-1.0862	-0.360114	0.00883279	0.307821	-0.63152	0.368947	0.667935	-0.271406	0.298989	-0.640352	-0.939341	[-0.8475 , -0.0618]	[-1.2516 , -0.378]	[-0.9132 , 0.0215]
O43399-3	Isoform 3 of Tumor protein D54 OS=Homo sapiens OX=9606 GN=TPD52L2	TPD52L2	13	938	1	1	Methyl [K55; K90]; Acetyl [N-Term]			RNA binding				2.6295 (df=1)	0.116964	0.165634				0.116964															0.929455
O43402	ER membrane protein complex subunit 8 OS=Homo sapiens OX=9606 GN=EMC8 PE=1 SV=1	EMC8	5	121	5	1			cytoplasm;cytosol;membrane;mitochondrion;nucleus	protein binding				1.5575 (df=5)	0.181194	0.236694	0.818454	0.990113	0.999774	0.603974	0.853399	0.996533	0.976167	0.212279	0.435952	0.999818	0.415001	0.678347	0.566165	0.80951	0.999434	0.329341	0.180567	0.0877239	-0.729984	-0.531722	-0.148775	-0.241617	-1.05933	-0.861063	-0.0928427	-0.910551	-0.712289	-0.817708	-0.619446	0.198262	[-0.4487 , 1.1074]	[-0.6845 , 1.0456]	[-0.8379 , 1.0134]
O43405	Cochlin OS=Homo sapiens OX=9606 GN=COCH PE=1 SV=1	COCH	5	13	5	1		defense response;regulation of biological process;response to stimulus	extracellular	protein binding				5.8011 (df=3)	0.00166376	0.00508821		0.53254	0.907465		0.00709473					0.961496		0.000837609		0.00471762			0.592706	0.331759		-2.26702					-0.260947		-2.85972		-2.59878			[-0.5673 , 1.7527]	[-0.9791 , 1.6427]
O43414	ERI1 exoribonuclease 3 OS=Homo sapiens OX=9606 GN=ERI3 PE=1 SV=2	ERI3	9	175	9	1		metabolic process		catalytic activity;metal ion binding;RNA binding				3.8678 (df=5)	0.00335977	0.00910032	0.0788175	0.996418	0.796599	0.179153	0.092409	0.0580047	0.918188	0.972704	0.895316	0.621488	0.120939	0.0611739	0.742925	0.567619	0.999906	-0.449798	0.0894828	-0.24973	-0.66825	-0.75303	0.539281	0.200068	-0.218451	-0.303232	-0.339213	-0.757732	-0.842513	-0.418519	-0.5033	-0.0847805	[-0.9293 , 0.0297]	[-0.4437 , 0.6227]	[-0.8202 , 0.3208]
O43426	Synaptojanin-1 OS=Homo sapiens OX=9606 GN=SYNJ1 PE=1 SV=2	SYNJ1	13	94	12	1		cell organization and biogenesis;metabolic process;response to stimulus;transport	cytoplasm;cytosol;membrane	catalytic activity;RNA binding	Metabolic pathways; Phosphatidylinositol signaling system; Inositol phosphate metabolism	Synthesis of PIPs at the plasma membrane; Synthesis of IP3 and IP4 in the cytosol; Clathrin-mediated endocytosis; Synthesis of IP2, IP, and Ins in the cytosol	EGF/EGFR Signaling Pathway	23.7075 (df=5)	9.96891e-15	2.69419e-12	0.91509	0.996054	0.592277	0.00819401	1.1022e-10	0.750361	0.171334	0.0494606	1.12735e-10	0.904308	0.00540097	1.10332e-10	0.000606113	1.10139e-10	0.000232644	-0.206241	0.114049	0.393931	-1.249	-3.3424	0.32029	0.600171	-1.04276	-3.13616	0.279882	-1.36305	-3.45645	-1.64293	-3.73633	-2.0934	[-0.805 , 0.3925]	[-0.5517 , 0.7798]	[-0.3184 , 1.1063]
O43427	Acidic fibroblast growth factor intracellular-binding protein OS=Homo sapiens OX=9606 GN=FIBP PE=1 SV=3	FIBP	7	119	7	1		regulation of biological process;response to stimulus	membrane;mitochondrion;nucleus	protein binding				1.6718 (df=5)	0.150489	0.203431	0.920649	0.932936	0.456126	0.999447	0.974284	0.485095	0.113189	0.999886	0.777754	0.957145	0.945819	0.999994	0.679464	0.996964	0.959921	-0.198981	0.212098	0.437248	-0.114754	0.260595	0.411079	0.636229	0.0842273	0.459576	0.22515	-0.326852	0.0484964	-0.552002	-0.176653	0.375349	[-0.7867 , 0.3888]	[-0.4414 , 0.8656]	[-0.262 , 1.1365]
O43432	Eukaryotic translation initiation factor 4 gamma 3 OS=Homo sapiens OX=9606 GN=EIF4G3 PE=1 SV=2	EIF4G3	24	476	16	1		metabolic process;regulation of biological process	cytosol	protein binding;RNA binding	RNA transport; Viral myocarditis	ISG15 antiviral mechanism	Translation Factors	4.4449 (df=5)	0.001229	0.00398931	0.0573505	0.854011	0.525479	0.988083	0.357441	0.743676	0.00177739	0.216919	0.999569	0.126788	0.774561	0.8473	0.995507	0.0470285	0.340379	0.932637	0.420212	-0.664684	-0.354439	1.11124	-0.512424	-1.59732	-1.28708	0.178605	-1.0849	-0.774652	0.691029	0.310244	1.77593	1.46568	[-0.0173 , 1.8826]	[-0.636 , 1.4764]	[-1.7949 , 0.4655]
O43447	Peptidyl-prolyl cis-trans isomerase H OS=Homo sapiens OX=9606 GN=PPIH PE=1 SV=1	PPIH	14	466	12	1	Methyl [K38]; Met-loss+Acetyl [N-Term]	cell organization and biogenesis;metabolic process;regulation of biological process	cytoplasm;nucleus;spliceosomal complex	catalytic activity;protein binding	Spliceosome	mRNA Splicing - Major Pathway		4.5916 (df=5)	0.00095333	0.00324159	0.939822	0.0659884	0.999994	0.917699	0.00126754	0.398467	0.988958	0.99751	0.00879106	0.225692	0.969815	0.260547	0.95978	0.00477943	0.169777	-0.201867	-0.68383	-0.03481	-0.374549	-1.54382	-0.481964	0.167057	-0.172682	-1.34195	0.64902	0.309282	-0.859986	-0.339739	-1.50901	-1.16927	[-0.8407 , 0.437]	[-1.3941 , 0.0265]	[-0.7948 , 0.7252]
O43448	Voltage-gated potassium channel subunit beta-3 OS=Homo sapiens OX=9606 GN=KCNAB3 PE=1 SV=2	KCNAB3	2	100	1	1		regulation of biological process;transport	cytoplasm;membrane	transporter activity		Voltage gated Potassium channels	Metapathway biotransformation	2.6064 (df=5)	0.0315051	0.0561811	0.998713	0.999924	0.999934	0.894465	0.0256426	0.999997	0.994879	0.806211	0.015599	0.998986	0.867434	0.0324756	0.955076	0.0737698	0.691007	0.117795	0.0765027	-0.076463	-0.580433	-1.57571	-0.0412922	-0.194258	-0.698228	-1.69351	-0.152966	-0.656936	-1.65222	-0.50397	-1.49925	-0.995281	[-0.7548 , 0.9904]	[-0.9338 , 1.0868]	[-1.1144 , 0.9615]
O43451	Maltase-glucoamylase, intestinal OS=Homo sapiens OX=9606 GN=MGAM PE=1 SV=5	MGAM	13	20	11	1		metabolic process;transport	membrane	catalytic activity	Starch and sucrose metabolism; Metabolic pathways; Carbohydrate digestion and absorption; Galactose metabolism	Digestion of dietary carbohydrate; Neutrophil degranulation		0.9126 (df=5)	0.47704	0.530796	0.999995	0.480501	0.874291	0.999998	0.987009	0.588255	0.923224	0.999973	0.993019	0.995982	0.834647	0.996569	0.964114	0.999997	0.992047	-0.0426138	-0.663377	-0.442798	0.061832	-0.370671	-0.620763	-0.400184	0.104446	-0.328057	0.220579	0.725209	0.292706	0.50463	0.0721271	-0.432503	[-1.0174 , 0.9321]	[-1.7472 , 0.4204]	[-1.6024 , 0.7169]
O43464	Serine protease HTRA2, mitochondrial OS=Homo sapiens OX=9606 GN=HTRA2 PE=1 SV=2	HTRA2	11	321	10	1	Methyl [K156; K237]	cell death;cell organization and biogenesis;metabolic process;regulation of biological process;response to stimulus	chromosome;cytoskeleton;cytosol;endoplasmic reticulum;membrane;mitochondrion;nucleus	catalytic activity;protein binding	Apoptosis; Parkinson's disease; Apoptosis - multiple species		Parkinsons Disease Pathway; Nanomaterial induced apoptosis	2.4089 (df=5)	0.0432142	0.0729771	0.999275	0.603358	0.999313	0.998168	0.137735	0.438345	1	0.989155	0.222744	0.560168	0.99217	0.0147946	0.989571	0.305251	0.227805	-0.0909152	0.45984	-0.10698	0.189056	-1.10881	0.550755	-0.0160647	0.279972	-1.0179	-0.56682	-0.270783	-1.56865	0.296036	-1.00183	-1.29787	[-0.8468 , 0.665]	[-0.3806 , 1.3003]	[-1.0063 , 0.7923]
O43488	Aflatoxin B1 aldehyde reductase member 2 OS=Homo sapiens OX=9606 GN=AKR7A2 PE=1 SV=3	AKR7A2	14	1474	12	1	Methyl [K236; K278]	metabolic process	cytoplasm;cytosol;Golgi	catalytic activity;protein binding	Metabolism of xenobiotics by cytochrome P450	Aflatoxin activation and detoxification	Aflatoxin B1 metabolism; Metapathway biotransformation	4.6396 (df=5)	0.000877428	0.0030344	1	0.999981	0.105976	0.0215583	0.962096	0.999993	0.131091	0.0232424	0.960978	0.240168	0.0253773	0.948617	0.000170517	0.155264	0.441884	-0.0027784	-0.0178614	-0.297985	0.530664	0.135767	-0.015083	-0.295207	0.533443	0.138546	-0.280124	0.548526	0.153629	0.82865	0.433753	-0.394897	[-0.2826 , 0.2771]	[-0.329 , 0.2933]	[-0.6309 , 0.0349]
O43491	Band 4.1-like protein 2 OS=Homo sapiens OX=9606 GN=EPB41L2 PE=1 SV=1	EPB41L2	56	2692	49	1	Methyl [K256]	cell division;cell organization and biogenesis;transport	cytoplasm;cytoskeleton;cytosol;membrane;nucleus	protein binding;structural molecule activity	Tight junction	Neurexins and neuroligins		7.9512 (df=5)	3.6841e-06	3.39859e-05	2.33332e-05	0.0422916	0.968702	0.999997	0.00325556	0.591052	0.0107668	0.031736	0.964942	0.467871	0.381698	0.467436	0.989713	0.0361077	0.0360539	0.693476	0.444803	0.125939	-0.0269363	0.882494	-0.248673	-0.567536	-0.720412	0.189018	-0.318864	-0.471739	0.437691	-0.152875	0.756555	0.90943	[0.302 , 1.085]	[0.0095 , 0.8801]	[-0.3398 , 0.5917]
O43493	Trans-Golgi network integral membrane protein 2 OS=Homo sapiens OX=9606 GN=TGOLN2 PE=1 SV=4		9	111	9	1								6.53 (df=5)	3.61731e-05	0.000221253	0.102734	0.639752	0.669667	0.700806	0.00403605	0.967563	0.00695148	0.0479791	0.24527	0.0966581	0.198058	0.101049	0.99897	0.000380844	0.00177948	0.51353	0.334993	-0.347512	-0.484423	1.26475	-0.178537	-0.861042	-0.997953	0.751222	-0.682505	-0.819416	0.929759	-0.136911	1.61226	1.74918	[-0.0573 , 1.0843]	[-0.2996 , 0.9696]	[-1.0266 , 0.3316]
O43504	Ragulator complex protein LAMTOR5 OS=Homo sapiens OX=9606 GN=LAMTOR5 PE=1 SV=1	LAMTOR5	2	31	2	1	Acetyl [N-Term]	cell organization and biogenesis;regulation of biological process;response to stimulus	cytoplasm;cytosol;membrane;vacuole	protein binding;structural molecule activity	Hepatitis B; mTOR signaling pathway	Energy dependent regulation of mTOR by LKB1-AMPK; Regulation of PTEN gene transcription; mTORC1-mediated signalling; TP53 Regulates Metabolic Genes; Macroautophagy		2.4971 (df=4)	0.0500041	0.0822172	0.177499	0.137646	0.886469	0.967604		0.991938	0.91549	0.311843		0.785295	0.227346		0.75553			-0.773661	-0.959663	-0.398053	0.37615		-0.186002	0.375608	1.14981		0.561611	1.33581		0.774203			[-1.7405 , 0.1932]	[-2.0961 , 0.1768]	[-1.6022 , 0.8061]
O43505	Beta-1,4-glucuronyltransferase 1 OS=Homo sapiens OX=9606 GN=B4GAT1 PE=1 SV=1	B3GNT1; B4GAT1	5	52	5	1		cellular component movement;metabolic process	Golgi;membrane	catalytic activity;metal ion binding;protein binding	Glycosaminoglycan biosynthesis - keratan sulfate; Metabolic pathways; Glycosphingolipid biosynthesis - lacto and neolacto series	Keratan sulfate biosynthesis; O-linked glycosylation		3.4617 (df=5)	0.00684748	0.016186	0.992392	0.0849231	0.313186	0.693579	0.327578	0.287	0.637601	0.492992	0.545566	0.998375	0.0352728	0.999779	0.0916197	0.993154	0.0876249	0.163088	0.852909	0.698163	-0.707696	0.993803	0.689821	0.535075	-0.870784	0.830715	-0.154746	-1.5606	0.140894	-1.40586	0.29564	1.7015	[-0.6641 , 0.9902]	[-0.0668 , 1.7726]	[-0.2859 , 1.6822]
O43516	WAS/WASL-interacting protein family member 1 OS=Homo sapiens OX=9606 GN=WIPF1 PE=1 SV=3	WIPF1	14	561	14	1		cell organization and biogenesis;cellular component movement;regulation of biological process;response to stimulus	cytoplasm;cytoskeleton;cytosol	protein binding	Endocytosis	Regulation of actin dynamics for phagocytic cup formation; RHO GTPases Activate WASPs and WAVEs		1.5151 (df=5)	0.193965	0.250197	0.950256	0.706008	0.739191	0.883451	0.549485	0.989015	0.989092	0.611884	0.858608	1	0.397164	0.979998	0.412719	0.984908	0.281043	0.334958	0.607041	0.624518	-0.712762	1.09631	0.272083	0.289559	-1.04772	0.76135	0.0174761	-1.3198	0.489267	-1.33728	0.471791	1.80907	[-0.7753 , 1.4453]	[-0.6275 , 1.8415]	[-0.6964 , 1.9454]
O43548	Protein-glutamine gamma-glutamyltransferase 5 OS=Homo sapiens OX=9606 GN=TGM5 PE=1 SV=4	TGM5	6	71	5	1	Met-loss+Acetyl [N-Term]	cell death;metabolic process	cytoplasm;membrane	catalytic activity;metal ion binding		Formation of the cornified envelope		0.6542 (df=5)	0.659151	0.699204	0.953398	0.999636	0.999892	0.999516	0.613774	0.997336	0.99684	0.96364	0.895304	1	0.996247	0.776528	0.99756	0.779193	0.687184	0.167354	0.0654211	0.0547269	-0.107035	0.523694	-0.101932	-0.112627	-0.274389	0.356341	-0.0106943	-0.172456	0.458273	-0.161762	0.468967	0.630729	[-0.3961 , 0.7309]	[-0.5611 , 0.692]	[-0.6157 , 0.7251]
O43556	Epsilon-sarcoglycan OS=Homo sapiens OX=9606 GN=SGCE PE=1 SV=6	SGCE	4	69	4	1		cell organization and biogenesis	cytoplasm;cytoskeleton;Golgi;membrane					5.4656 (df=5)	0.000213577	0.000950289	0.979444	0.456127	0.921277	0.510619	4.74942e-05	0.861642	0.999024	0.782247	0.000297248	0.986672	0.994851	0.00655807	0.924187	0.00195829	0.135454	-0.211225	-0.598041	-0.345751	-0.879622	-2.52377	-0.386816	-0.134526	-0.668397	-2.31255	0.25229	-0.281581	-1.92573	-0.533871	-2.17802	-1.64415	[-1.0714 , 0.6489]	[-1.5544 , 0.3584]	[-1.3691 , 0.6776]
O43566	Regulator of G-protein signaling 14 OS=Homo sapiens OX=9606 GN=RGS14 PE=1 SV=4	RGS14	6	37	6	1		cell division;cell organization and biogenesis;regulation of biological process;response to stimulus;transport	cytoplasm;cytoskeleton;membrane;nucleus	enzyme regulator activity;protein binding;signal transducer activity;structural molecule activity	Rap1 signaling pathway	G alpha (i) signalling events	Myometrial Relaxation and Contraction Pathways; Calcium Regulation in the Cardiac Cell	1.2855 (df=5)	0.27802	0.338965	0.995643	0.994443	0.99439	0.931324	0.447276	1	0.934456	0.987038	0.293678	0.934513	0.992464	0.308858	0.822537	0.753171	0.273295	-0.100261	-0.117417	0.125892	-0.321018	0.619622	-0.0171568	0.226152	-0.220757	0.719883	0.243309	-0.2036	0.737039	-0.44691	0.49373	0.94064	[-0.6733 , 0.4728]	[-0.7546 , 0.5198]	[-0.5559 , 0.8077]
O43567	E3 ubiquitin-protein ligase RNF13 OS=Homo sapiens OX=9606 GN=RNF13 PE=1 SV=1	RNF13	3	12	3	1		metabolic process	cytosol;endoplasmic reticulum;endosome;Golgi;membrane;nucleus;vacuole	catalytic activity;metal ion binding;protein binding				0.9625 (df=4)	0.435174	0.492106		0.999426	0.643425	0.991706	0.675993					0.830157	0.980861	0.796947	0.726303	0.997076	0.676637		-0.0904863	-0.58376	0.296273	-0.804595					-0.493273	0.38676	-0.714109	0.880033	-0.220836	-1.10087		[-1.2295 , 1.0486]	[-1.7763 , 0.6088]
O43583	Density-regulated protein OS=Homo sapiens OX=9606 GN=DENR PE=1 SV=2	DENR	8	376	8	1	Met-loss+Acetyl [N-Term]; Methyl [K197]	cell organization and biogenesis;metabolic process	ribosome	protein binding;RNA binding				6.7154 (df=5)	2.66983e-05	0.000172557	0.999868	0.805784	0.66402	0.537715	4.07209e-05	0.915091	0.806304	0.46082	9.23786e-05	0.999697	0.172402	0.00183602	0.126348	0.00522711	2.24908e-05	0.0466587	0.263805	0.336568	-0.548441	1.62492	0.217147	0.28991	-0.595099	1.57826	0.0727629	-0.812246	1.36112	-0.885009	1.28835	2.17336	[-0.5029 , 0.5962]	[-0.3472 , 0.8748]	[-0.3172 , 0.9903]
O43586	Proline-serine-threonine phosphatase-interacting protein 1 OS=Homo sapiens OX=9606 GN=PSTPIP1 PE=1 SV=1	PSTPIP1	8	62	7	1		defense response;regulation of biological process;response to stimulus;transport	cytoplasm;cytoskeleton;cytosol;membrane	protein binding	NOD-like receptor signaling pathway	The NLRP3 inflammasome	T-Cell antigen Receptor (TCR) Signaling Pathway	3.2689 (df=5)	0.00960663	0.0213588	0.999328	0.822995	0.995417	0.0440226	0.511082	0.94865	0.999928	0.0285586	0.654926	0.992746	0.00753754	0.946262	0.032805	0.796613	0.00647904	0.0788557	0.311106	0.140102	-1.16155	0.680677	0.232251	0.061246	-1.24041	0.601821	-0.171005	-1.47266	0.369571	-1.30165	0.540575	1.84223	[-0.587 , 0.7448]	[-0.4293 , 1.0515]	[-0.6521 , 0.9323]
O43592	Exportin-T OS=Homo sapiens OX=9606 GN=XPOT PE=1 SV=2	XPOT	22	509	22	1	Methyl [K29]	transport	cytoplasm;cytosol;nucleus	protein binding;RNA binding	RNA transport	tRNA processing in the nucleus		7.9278 (df=5)	3.82236e-06	3.5084e-05	0.831966	0.567369	0.377589	5.85426e-05	0.998268	0.993931	0.94206	4.61597e-06	0.99976	0.99905	2.54406e-06	0.989459	1.58237e-06	0.95382	0.00120671	-0.264514	-0.402188	-0.509147	1.85487	-0.15796	-0.137674	-0.244633	2.11939	0.106554	-0.106959	2.25706	0.244228	2.36402	0.351187	-2.01283	[-0.9035 , 0.3745]	[-1.1127 , 0.3083]	[-1.2694 , 0.2511]
O43593	Lysine-specific demethylase hairless OS=Homo sapiens OX=9606 GN=HR PE=1 SV=5	HR	2	32	1	1		cell organization and biogenesis;metabolic process;regulation of biological process	chromosome;nucleus	catalytic activity;DNA binding;metal ion binding				0.4907 (df=5)	0.782314	0.809493	0.972491	0.993859	0.999685	0.999586	0.960711	0.841609	0.941924	0.999994	0.998926	0.99995	0.987815	0.868859	0.996764	0.929285	0.998642	-0.357803	0.291311	0.164454	-0.25088	-0.667102	0.649114	0.522256	0.106923	-0.3093	-0.126858	-0.542191	-0.958414	-0.415334	-0.831556	-0.416222	[-1.7217 , 1.0061]	[-1.2566 , 1.8392]	[-1.4582 , 1.7871]
O43597	Protein sprouty homolog 2 OS=Homo sapiens OX=9606 GN=SPRY2 PE=1 SV=1	SPRY2	2	3	2	1		cell organization and biogenesis;development;regulation of biological process	cytoplasm;cytoskeleton;cytosol;membrane;nucleus	enzyme regulator activity;protein binding	MicroRNAs in cancer	Spry regulation of FGF signaling; EGFR downregulation	Signaling Pathways in Glioblastoma; Ectoderm Differentiation; EGF/EGFR Signaling Pathway
O43598	2'-deoxynucleoside 5'-phosphate N-hydrolase 1 OS=Homo sapiens OX=9606 GN=DNPH1 PE=1 SV=1	C6orf108; DNPH1	11	536	11	1		cell differentiation;cell proliferation;metabolic process;regulation of biological process	cytoplasm;cytosol;nucleus	catalytic activity;protein binding		Purine catabolism		1.663 (df=5)	0.152667	0.205704	0.890594	0.903743	0.972764	0.999822	0.471625	0.384919	0.587324	0.999207	0.170731	0.999968	0.948083	0.891441	0.977178	0.847442	0.608661	0.277059	-0.297878	-0.234592	0.116606	-0.797113	-0.574937	-0.511651	-0.160453	-1.07417	0.0632858	0.414484	-0.499235	0.351199	-0.56252	-0.913719	[-0.476 , 1.0302]	[-1.1352 , 0.5395]	[-1.1305 , 0.6614]
O43615	Mitochondrial import inner membrane translocase subunit TIM44 OS=Homo sapiens OX=9606 GN=TIMM44 PE=1 SV=2	TIMM44	23	956	23	1	Methyl [K293]	transport	membrane;mitochondrion;organelle lumen	nucleotide binding;protein binding		Mitochondrial protein import; Metabolism of proteins		7.4131 (df=5)	8.6461e-06	6.80589e-05	0.700559	0.927166	0.999084	0.158795	5.65158e-06	0.999527	0.640556	0.623402	0.000203204	0.858936	0.528093	0.000178716	0.141326	1.16599e-05	0.176438	0.159116	0.118467	-0.0483005	0.459177	1.04319	-0.0406491	-0.207417	0.30006	0.884074	-0.166768	0.340709	0.924723	0.507477	1.09149	0.584013	[-0.1625 , 0.4807]	[-0.2391 , 0.476]	[-0.4309 , 0.3343]
O43617	Trafficking protein particle complex subunit 3 OS=Homo sapiens OX=9606 GN=TRAPPC3 PE=1 SV=1	TRAPPC3	8	407	8	1		cell organization and biogenesis;transport	cytosol;endoplasmic reticulum;Golgi;membrane	protein binding		RAB GEFs exchange GTP for GDP on RABs; COPII (Coat Protein 2) Mediated Vesicle Transport		3.4865 (df=5)	0.00655659	0.0156198	0.927089	0.00173962	0.9887	0.997279	0.846268	0.0350296	0.999972	0.999999	0.990338	0.0628849	0.331866	0.753321	1	0.982913	0.993778	0.13806	0.637898	0.106522	0.113204	0.288516	0.499839	-0.0315375	-0.0248553	0.150456	-0.531376	-0.524694	-0.349383	0.00668221	0.181994	0.175311	[-0.2785 , 0.5547]	[0.1747 , 1.1011]	[-0.3891 , 0.6021]
O43633	Charged multivesicular body protein 2a OS=Homo sapiens OX=9606 GN=CHMP2A PE=1 SV=1	CHMP2A	12	453	12	1		cell communication;cell organization and biogenesis;metabolic process;regulation of biological process;response to stimulus;transport	chromosome;cytosol;endosome;membrane	protein binding	Endocytosis	Budding and maturation of HIV virion; Macroautophagy; Endosomal Sorting Complex Required For Transport (ESCRT); Lysosome Vesicle Biogenesis		5.7784 (df=5)	0.000126034	0.000622238	0.564443	0.999771	0.00389893	0.872379	0.90649	0.847579	4.03944e-05	0.999989	0.369057	0.00591002	0.947367	0.858991	0.0107617	0.683708	0.5657	0.57713	0.107415	-1.56653	0.668884	-0.615985	-0.469715	-2.14366	0.0917543	-1.19311	-1.67394	0.56147	-0.7234	2.23541	0.950543	-1.28487	[-0.4396 , 1.5939]	[-1.0231 , 1.2379]	[-2.7762 , -0.3569]
O43639	Cytoplasmic protein NCK2 OS=Homo sapiens OX=9606 GN=NCK2 PE=1 SV=2	NCK2	12	159	11	1	Met-loss+Acetyl [N-Term]	cell organization and biogenesis;cellular component movement;regulation of biological process;response to stimulus	cytoplasm;cytosol;endoplasmic reticulum;membrane	protein binding;structural molecule activity	ErbB signaling pathway; Pathogenic Escherichia coli infection; Axon guidance; T cell receptor signaling pathway	Nephrin family interactions; Ephrin signaling; Activation of RAC1; VEGFA-VEGFR2 Pathway; Regulation of cortical dendrite branching; Downstream signal transduction	Pathogenic Escherichia coli infection; Brain-Derived Neurotrophic Factor (BDNF) signaling pathway; EGF/EGFR Signaling Pathway	1.3267 (df=5)	0.260931	0.32122	0.73336	0.81426	0.994425	0.453703	0.412032	1	0.989837	0.915055	0.8912	0.993054	0.925618	0.904402	0.758373	0.721602	1	-0.276557	-0.275178	-0.127418	-0.624459	-0.647577	0.0013789	0.149139	-0.347902	-0.37102	0.14776	-0.349281	-0.372399	-0.497041	-0.520159	-0.0231175	[-0.8573 , 0.3042]	[-0.9209 , 0.3706]	[-0.8184 , 0.5636]
O43660	Pleiotropic regulator 1 OS=Homo sapiens OX=9606 GN=PLRG1 PE=1 SV=1	PLRG1	16	476	16	1		cell organization and biogenesis;metabolic process;regulation of biological process	membrane;nucleus;spliceosomal complex	catalytic activity;protein binding	Spliceosome	mRNA Splicing - Major Pathway		2.6978 (df=5)	0.0261466	0.0479859	0.86576	0.940634	0.138007	0.887698	0.164136	0.999999	0.666316	0.523706	0.517805	0.6792	0.605598	0.518753	0.108918	0.988285	0.0884242	0.146	0.131516	0.381874	-0.238731	0.53277	-0.0144836	0.235875	-0.384731	0.386771	0.250358	-0.370247	0.401254	-0.620605	0.150896	0.771501	[-0.2296 , 0.5216]	[-0.2861 , 0.5491]	[-0.065 , 0.8287]
O43665	Regulator of G-protein signaling 10 OS=Homo sapiens OX=9606 GN=RGS10 PE=1 SV=3		9	161	9	1								2.6341 (df=5)	0.0292208	0.0527	0.259014	0.92183	0.999913	0.968462	0.0238922	0.933439	0.6271	0.99696	0.413528	0.988838	0.999991	0.16005	0.991783	0.0668043	0.442474	-0.341735	-0.17163	-0.0425331	-0.212711	-0.858267	0.170105	0.299202	0.129024	-0.516532	0.129097	-0.0410812	-0.686637	-0.170178	-0.815734	-0.645556	[-0.7994 , 0.116]	[-0.6805 , 0.3373]	[-0.587 , 0.502]
O43670	BUB3-interacting and GLEBS motif-containing protein ZNF207 OS=Homo sapiens OX=9606 GN=ZNF207 PE=1 SV=1	ZNF207	7	457	7	1		cell division;cell organization and biogenesis;regulation of biological process	chromosome;cytoplasm;cytoskeleton;nucleus	DNA binding;metal ion binding;protein binding;RNA binding				3.5958 (df=5)	0.00541126	0.0133489	0.939915	0.999994	0.74344	0.898046	0.0214694	0.984481	0.992014	0.620749	0.00482584	0.868971	0.886382	0.0267557	0.437056	0.00292513	0.553811	0.173657	0.0282379	0.307615	-0.340652	-1.04305	-0.145419	0.133958	-0.514309	-1.21671	0.279377	-0.36889	-1.07129	-0.648267	-1.35066	-0.702398	[-0.3761 , 0.7234]	[-0.583 , 0.6395]	[-0.3465 , 0.9617]
O43674	NADH dehydrogenase [ubiquinone] 1 beta subcomplex subunit 5, mitochondrial OS=Homo sapiens OX=9606 GN=NDUFB5 PE=1 SV=1	NDUFB5	5	343	5	1		cell organization and biogenesis;metabolic process;transport	membrane;mitochondrion	catalytic activity	Parkinson's disease; Oxidative phosphorylation; Non-alcoholic fatty liver disease (NAFLD); Alzheimer's disease; Huntington's disease; Metabolic pathways	Complex I biogenesis	Electron Transport Chain; Oxidative phosphorylation	3.2131 (df=5)	0.0105975	0.0231112	0.472241	0.774733	0.999893	0.980865	0.0971934	0.0603082	0.534584	0.999389	0.614573	0.945833	0.677217	0.0159381	0.965959	0.108098	0.667611	0.504468	-0.410762	-0.0791757	0.339215	1.27454	-0.91523	-0.583643	-0.165252	0.770072	0.331586	0.749977	1.6853	0.418391	1.35371	0.935324	[-0.3137 , 1.3227]	[-1.3205 , 0.499]	[-1.0526 , 0.8942]
O43676	NADH dehydrogenase [ubiquinone] 1 beta subcomplex subunit 3 OS=Homo sapiens OX=9606 GN=NDUFB3 PE=1 SV=3	NDUFB3	3	208	3	1		cell organization and biogenesis;metabolic process;transport	membrane;mitochondrion	catalytic activity;transporter activity	Metabolic pathways; Alzheimer's disease; Non-alcoholic fatty liver disease (NAFLD); Parkinson's disease; Oxidative phosphorylation; Huntington's disease	Complex I biogenesis	Electron Transport Chain	1.6128 (df=5)	0.165693	0.22011	0.997314	0.194998	0.727755	0.988519	0.961683	0.437656	0.921847	0.94891	0.993765	0.981209	0.333989	0.986949	0.678245	0.999994	0.871328	-0.113181	-0.63563	-0.40871	0.26519	-0.348564	-0.52245	-0.295529	0.378371	-0.235384	0.226921	0.90082	0.287066	0.673899	0.0601452	-0.613754	[-0.8298 , 0.6034]	[-1.4324 , 0.1611]	[-1.2613 , 0.4438]
O43678	NADH dehydrogenase [ubiquinone] 1 alpha subcomplex subunit 2 OS=Homo sapiens OX=9606 GN=NDUFA2 PE=1 SV=3	NDUFA2	9	447	9	1	Methyl [K46]	cell organization and biogenesis;metabolic process;transport	membrane;mitochondrion	catalytic activity	Metabolic pathways; Parkinson's disease; Oxidative phosphorylation; Non-alcoholic fatty liver disease (NAFLD); Alzheimer's disease; Huntington's disease	Complex I biogenesis	Electron Transport Chain; Oxidative phosphorylation	3.2605 (df=5)	0.00974946	0.0215853	0.855783	0.666989	0.50142	0.436987	0.84925	0.148524	0.0965522	0.851982	0.996394	0.999539	0.0892599	0.331956	0.0608608	0.245248	0.994961	-0.131315	0.188984	0.236762	-0.361326	-0.228111	0.320298	0.368077	-0.230011	-0.0967967	0.0477786	-0.55031	-0.417095	-0.598088	-0.464874	0.133214	[-0.4625 , 0.1999]	[-0.1793 , 0.5572]	[-0.1573 , 0.6308]
O43681	ATPase GET3 OS=Homo sapiens OX=9606 GN=GET3 PE=1 SV=2	ASNA1	17	879	16	1	Met-loss+Acetyl [N-Term]	transport	cytoplasm;endoplasmic reticulum;membrane;nucleus	catalytic activity;metal ion binding;nucleotide binding;protein binding;transporter activity		XBP1(S) activates chaperone genes		3.4544 (df=5)	0.00693573	0.0163382	0.275893	0.0220198	0.999576	0.99996	0.398604	0.810907	0.319238	0.71219	0.985724	0.0399429	0.26487	0.999986	1	0.364616	0.583687	-0.414189	-0.69129	0.072286	0.0645351	-0.636083	-0.277101	0.486475	0.478724	-0.221894	0.763576	0.755825	0.0552067	-0.00775092	-0.708369	-0.700618	[-0.978 , 0.1496]	[-1.3182 , -0.0644]	[-0.5985 , 0.7431]
O43684	Mitotic checkpoint protein BUB3 OS=Homo sapiens OX=9606 GN=BUB3 PE=1 SV=1	BUB3	17	1052	17	1	Methyl [K216]	cell division;cell organization and biogenesis;metabolic process;regulation of biological process	chromosome;cytosol;nucleus	protein binding	Cell cycle; HTLV-I infection	Inactivation of APC/C via direct inhibition of the APC/C complex; Amplification of signal from unattached kinetochores via a MAD2 inhibitory signal; Separation of Sister Chromatids; Resolution of Sister Chromatid Cohesion; RHO GTPases Activate Formins; Cdc20:Phospho-APC/C mediated degradation of Cyclin A; APC-Cdc20 mediated degradation of Nek2A	Cell Cycle	1.3563 (df=5)	0.249221	0.308493	0.994911	0.985389	0.707678	0.670222	0.99879	0.99997	0.456022	0.850284	0.999999	0.436843	0.91363	1	0.206239	0.795332	0.957346	-0.0592463	-0.0828629	0.191293	-0.2875	-0.0751665	-0.0236166	0.250539	-0.228254	-0.0159202	0.274156	-0.204637	0.00769637	-0.478793	-0.266459	0.212333	[-0.3869 , 0.2684]	[-0.4471 , 0.2814]	[-0.1985 , 0.5811]
O43704	Sulfotransferase family cytosolic 1B member 1 OS=Homo sapiens OX=9606 GN=SULT1B1 PE=1 SV=2	SULT1B1	2	5	2	1		cell differentiation;metabolic process	cytoplasm;cytosol	catalytic activity;protein binding		Cytosolic sulfonation of small molecules	Sulfation Biotransformation Reaction; Metapathway biotransformation
O43707	Alpha-actinin-4 OS=Homo sapiens OX=9606 GN=ACTN4 PE=1 SV=2	ACTN4	112	20110	68	1	Methyl [K122; K140; K166; K193; K214; K233; K255; K273; K300; K350; K378; K417; K432; K450; K518; K521; K535; K592; K622; K643; K691; K701; K723; K791; K853; K859; K899]	cell organization and biogenesis;cellular component movement;regulation of biological process;response to stimulus;transport	cytoplasm;cytoskeleton;cytosol;extracellular;nucleus;organelle lumen	DNA binding;metal ion binding;protein binding;RNA binding	Adherens junction; Arrhythmogenic right ventricular cardiomyopathy (ARVC); Leukocyte transendothelial migration; Focal adhesion; Amoebiasis; Systemic lupus erythematosus; Regulation of actin cytoskeleton; Tight junction; Viral carcinogenesis	Platelet degranulation ; Nephrin family interactions	Arrhythmogenic Right Ventricular Cardiomyopathy; Primary Focal Segmental Glomerulosclerosis FSGS; Striated Muscle Contraction	1.9884 (df=5)	0.0888076	0.131928	0.999994	0.999943	0.996372	0.0792753	0.720117	0.999548	0.991704	0.071909	0.684826	0.99981	0.145382	0.829735	0.242274	0.91965	0.910572	-0.0106644	0.0187112	0.0469496	0.377099	0.194656	0.0293756	0.057614	0.387763	0.20532	0.0282384	0.358387	0.175944	0.330149	0.147706	-0.182443	[-0.2452 , 0.2238]	[-0.242 , 0.2795]	[-0.232 , 0.3259]
O43708	Maleylacetoacetate isomerase OS=Homo sapiens OX=9606 GN=GSTZ1 PE=1 SV=3	GSTZ1	9	297	9	1		metabolic process	cytoplasm;cytosol;mitochondrion	antioxidant activity;catalytic activity;protein binding	Tyrosine metabolism; Metabolic pathways	Glutathione conjugation; Phenylalanine and tyrosine catabolism	Metapathway biotransformation	2.1306 (df=5)	0.0697436	0.107717	0.999185	0.647035	0.991213	0.989496	0.0361906	0.850647	0.999745	0.9986	0.0688138	0.974116	0.999234	0.381851	0.999964	0.15773	0.43119	-0.0646703	-0.305735	-0.127015	-0.190457	-0.937997	-0.241065	-0.0623447	-0.125787	-0.873326	0.17872	0.115278	-0.632261	-0.0634423	-0.810982	-0.74754	[-0.5895 , 0.4601]	[-0.8892 , 0.2778]	[-0.7514 , 0.4973]
O43709	Probable 18S rRNA (guanine-N(7))-methyltransferase OS=Homo sapiens OX=9606 GN=BUD23 PE=1 SV=2	WBSCR22; BUD23	6	73	5	1		cell organization and biogenesis;metabolic process;regulation of biological process	cytoplasm;nucleus	catalytic activity;protein binding;RNA binding		Major pathway of rRNA processing in the nucleolus and cytosol; rRNA modification in the nucleus and cytosol		2.2626 (df=5)	0.0556188	0.0893353	0.998887	0.3325	0.241292	0.999809	0.838254	0.576879	0.444314	1	0.727433	0.999734	0.917117	0.172632	0.847426	0.128089	0.869592	0.118887	0.701237	0.817836	0.142068	-0.635601	0.58235	0.698949	0.0231815	-0.754488	0.116599	-0.559169	-1.33684	-0.675768	-1.45344	-0.777669	[-0.7858 , 1.0236]	[-0.3046 , 1.7071]	[-0.2585 , 1.8941]
O43719	HIV Tat-specific factor 1 OS=Homo sapiens OX=9606 GN=HTATSF1 PE=1 SV=1	HTATSF1	21	426	21	1	Met-loss+Acetyl [N-Term]	metabolic process;regulation of biological process	nucleus;spliceosomal complex	RNA binding				3.6041 (df=5)	0.00533376	0.0132068	0.999893	0.0160206	0.293125	0.966737	0.688717	0.0384498	0.435641	0.93872	0.780646	0.944407	0.0660053	0.985902	0.301161	1	0.50866	0.0274588	0.427642	0.290065	-0.158734	0.290177	0.400183	0.262606	-0.186193	0.262718	-0.137577	-0.586376	-0.137465	-0.448799	0.000112412	0.448912	[-0.3099 , 0.3648]	[0.0526 , 0.8027]	[-0.1113 , 0.6914]
O43739	Cytohesin-3 OS=Homo sapiens OX=9606 GN=CYTH3 PE=1 SV=2	CYTH3	9	219	7	1		regulation of biological process;transport	cytoplasm;cytosol;membrane	protein binding	Endocytosis; Phospholipase D signaling pathway	Intra-Golgi traffic	Insulin Signaling	2.723 (df=5)	0.0250185	0.0463116	0.767722	1	0.659741	0.969094	0.033951	0.854714	0.99893	0.63925	0.223695	0.748154	0.975238	0.050951	0.538679	0.430502	0.0443705	-0.200676	5.05153e-06	-0.27086	0.203652	-0.792964	0.200681	-0.0701841	0.404328	-0.592288	-0.270865	0.203647	-0.792969	0.474512	-0.522104	-0.996616	[-0.6409 , 0.2396]	[-0.4895 , 0.4895]	[-0.7946 , 0.2529]
O43741	5'-AMP-activated protein kinase subunit beta-2 OS=Homo sapiens OX=9606 GN=PRKAB2 PE=1 SV=1	LOC101060511; PRKAB2	2	9	2	1		cell communication;metabolic process;regulation of biological process;response to stimulus;transport	cytosol	catalytic activity;protein binding	Insulin signaling pathway; Insulin resistance; Oxytocin signaling pathway; Longevity regulating pathway; Non-alcoholic fatty liver disease (NAFLD); Glucagon signaling pathway; Hypertrophic cardiomyopathy (HCM); FoxO signaling pathway; Adipocytokine signaling pathway; Longevity regulating pathway - multiple species; Circadian rhythm; AMPK signaling pathway	Translocation of GLUT4 to the plasma membrane; Energy dependent regulation of mTOR by LKB1-AMPK; Import of palmitoyl-CoA into the mitochondrial matrix; TP53 Regulates Metabolic Genes; Regulation of TP53 Activity through Phosphorylation; Macroautophagy; AMPK inhibits chREBP transcriptional activation activity; Activation of PPARGC1A (PGC-1alpha) by phosphorylation	AMP-activated Protein Kinase (AMPK) Signaling; Target Of Rapamycin (TOR) Signaling; Energy Metabolism; Sterol Regulatory Element-Binding Proteins (SREBP) signalling; Angiopoietin Like Protein 8 Regulatory Pathway
O43747	AP-1 complex subunit gamma-1 OS=Homo sapiens OX=9606 GN=AP1G1 PE=1 SV=5	AP1G1	31	1384	31	1	Methyl [K334]	cell organization and biogenesis;regulation of biological process;transport	cytoplasm;cytosol;endosome;Golgi;membrane	protein binding;transporter activity	Lysosome	Nef mediated downregulation of MHC class I complex cell surface expression; MHC class II antigen presentation; Golgi Associated Vesicle Biogenesis; Lysosome Vesicle Biogenesis		1.4628 (df=5)	0.210836	0.268166	0.979321	0.874983	0.999781	0.877384	0.325506	0.997531	0.999541	0.662515	0.596396	0.982421	0.512142	0.8056	0.835736	0.5244	0.158917	-0.113381	-0.195468	-0.0516266	0.300065	-0.555038	-0.0820864	0.0617546	0.413446	-0.441657	0.143841	0.495532	-0.359571	0.351691	-0.503412	-0.855103	[-0.5745 , 0.3477]	[-0.7081 , 0.3172]	[-0.6002 , 0.4969]
O43752	Syntaxin-6 OS=Homo sapiens OX=9606 GN=STX6 PE=1 SV=1	STX6	9	119	9	1		cell organization and biogenesis;regulation of biological process;transport	cytosol;endosome;Golgi;membrane	protein binding	SNARE interactions in vesicular transport	Intra-Golgi traffic; Retrograde transport at the Trans-Golgi-Network		2.442 (df=5)	0.040807	0.0694718	0.497394	0.179474	0.987941	0.999741	0.0957313	0.973051	0.963076	0.788499	0.595695	0.711078	0.517157	0.89396	0.984646	0.324603	0.221268	-0.407985	-0.610725	-0.175483	0.113102	-1.05645	-0.20274	0.232502	0.521087	-0.648461	0.435241	0.723827	-0.445721	0.288586	-0.880962	-1.16955	[-1.0845 , 0.2686]	[-1.363 , 0.1415]	[-0.9804 , 0.6294]
O43759	Synaptogyrin-1 OS=Homo sapiens OX=9606 GN=SYNGR1 PE=1 SV=2	SYNGR1	4	146	4	1	Acetyl [N-Term]	cell organization and biogenesis;regulation of biological process;transport	membrane	protein binding		Neutrophil degranulation		7.0513 (df=5)	1.54681e-05	0.000110118	0.113277	0.101897	0.572613	0.904508	2.09582e-06	0.999681	0.99555	0.997253	0.00094705	0.976991	0.988094	0.00308761	0.999999	0.000719958	0.0062688	-0.562178	-0.63624	-0.425676	-0.386898	-2.14914	-0.0740621	0.136502	0.17528	-1.58697	0.210564	0.249342	-1.5129	0.0387781	-1.72347	-1.76225	[-1.1973 , 0.073]	[-1.3425 , 0.07]	[-1.1813 , 0.33]
O43760	Synaptogyrin-2 OS=Homo sapiens OX=9606 GN=SYNGR2 PE=1 SV=1	SYNGR2	6	377	6	1	Acetyl [N-Term]	cell organization and biogenesis;transport	membrane	protein binding				1.5553 (df=5)	0.181848	0.237336	0.723199	0.999484	0.865128	0.908917	0.958907	0.63788	0.224675	0.459987	0.575956	0.974841	0.971693	0.990937	0.99993	1	0.999992	-0.252392	0.0653108	0.242473	0.315074	0.258944	0.317702	0.494865	0.567466	0.511336	0.177162	0.249763	0.193633	0.0726011	0.0164708	-0.0561303	[-0.776 , 0.2712]	[-0.5169 , 0.6475]	[-0.3805 , 0.8654]
O43765	Small glutamine-rich tetratricopeptide repeat-containing protein alpha OS=Homo sapiens OX=9606 GN=SGTA PE=1 SV=1	SGTA	10	352	9	1		metabolic process;regulation of biological process	cytoplasm;cytosol;membrane;nucleus	protein binding				5.0759 (df=5)	0.000414543	0.00163598	0.516688	0.546922	0.950493	0.99918	0.00452146	0.0275279	0.993341	0.756424	0.0884282	0.241359	0.982127	0.000226222	0.946197	0.0537304	0.0265863	-0.821577	0.888893	-0.496873	0.293422	-3.04277	1.71047	0.324705	1.115	-2.22119	-1.38577	-0.595471	-3.93166	0.790295	-2.54589	-3.33619	[-2.2076 , 0.5644]	[-0.6521 , 2.4299]	[-2.1458 , 1.152]
O43768	Alpha-endosulfine OS=Homo sapiens OX=9606 GN=ENSA PE=1 SV=1	ENSA	9	398	8	1		cell division;regulation of biological process;response to stimulus;transport	cytoplasm	enzyme regulator activity;protein binding		MASTL Facilitates Mitotic Progression		1.6908 (df=5)	0.145856	0.198232	0.134799	0.450637	0.999749	0.999639	0.999991	0.998531	0.488627	0.863243	0.784793	0.787775	0.959136	0.918962	0.999999	1	0.999996	0.419551	0.341478	0.0562912	0.0874395	0.0410831	-0.0780732	-0.36326	-0.332111	-0.378468	-0.285187	-0.254038	-0.300395	0.0311483	-0.0152081	-0.0463565	[-0.0692 , 0.9084]	[-0.202 , 0.885]	[-0.5252 , 0.6378]
O43772	Mitochondrial carnitine/acylcarnitine carrier protein OS=Homo sapiens OX=9606 GN=SLC25A20 PE=1 SV=1	SLC25A20	11	653	11	1		transport	cytosol;membrane;mitochondrion	transporter activity		Import of palmitoyl-CoA into the mitochondrial matrix	Fatty Acid Beta Oxidation; Mitochondrial LC-Fatty Acid Beta-Oxidation	1.7412 (df=5)	0.134244	0.185351	0.999994	0.991219	0.821812	0.798337	0.449942	0.997337	0.885287	0.766016	0.418164	0.990105	0.616593	0.293237	0.37033	0.14056	0.998039	-0.0173623	-0.0867101	-0.19204	0.287237	0.413597	-0.0693478	-0.174678	0.304599	0.43096	-0.10533	0.373947	0.500308	0.479277	0.605637	0.126361	[-0.4008 , 0.3661]	[-0.513 , 0.3396]	[-0.6482 , 0.2641]
O43776	Asparagine--tRNA ligase, cytoplasmic OS=Homo sapiens OX=9606 GN=NARS1 PE=1 SV=1	NARS	31	2149	30	1	Methyl [K50; K490]	metabolic process	cytoplasm;cytosol;mitochondrion	catalytic activity;nucleotide binding	Aminoacyl-tRNA biosynthesis	Cytosolic tRNA aminoacylation	Photodynamic therapy-induced unfolded protein response	9.9789 (df=5)	1.68264e-07	2.61796e-06	0.999293	0.996627	0.748922	6.90005e-06	0.0117455	0.97135	0.9029	4.06165e-06	0.00726603	0.574555	6.79384e-05	0.0445366	9.81443e-07	0.00157037	0.621475	-0.0489564	0.0753728	-0.227321	1.31535	0.82519	0.124329	-0.178365	1.3643	0.874146	-0.302694	1.23997	0.749817	1.54267	1.05251	-0.490157	[-0.458 , 0.3601]	[-0.3795 , 0.5302]	[-0.714 , 0.2594]
O43790	Keratin, type II cuticular Hb6 OS=Homo sapiens OX=9606 GN=KRT86 PE=1 SV=1	KRT86	79	11413	6	1	Methyl [K103; K132; K137; K191; K192; K193; K213; K222; K262; K279; K319; K340; K377; K379; K396]; Met-loss [N-Term]	cell death;regulation of biological process;transport	cytosol	catalytic activity;motor activity;protein binding;structural molecule activity		Formation of the cornified envelope		0.6345 (df=5)	0.673944	0.711688	0.999414	0.997661	0.99999	0.518735	0.999999	0.999992	0.999994	0.658863	0.999767	0.999872	0.747719	0.999208	0.663089	0.999978	0.729863	0.0917727	0.135958	0.0474598	0.80916	-0.0403328	0.0441853	-0.0443129	0.717388	-0.132106	-0.0884982	0.673202	-0.176291	0.761701	-0.0877926	-0.849493	[-0.7052 , 0.8888]	[-0.7502 , 1.0221]	[-0.9008 , 0.9957]
O43795	Unconventional myosin-Ib OS=Homo sapiens OX=9606 GN=MYO1B PE=1 SV=3	MYO1B	52	1933	45	1	Methyl [K192]	cell organization and biogenesis;cellular component movement;transport	cytoplasm;endosome;membrane	catalytic activity;motor activity;nucleotide binding;protein binding				1.961 (df=5)	0.0930097	0.136932	0.986229	0.995081	0.344556	0.991922	0.431281	0.88858	0.1381	0.931565	0.241619	0.740901	0.999906	0.697129	0.974634	0.997978	0.921016	0.0862576	-0.0766928	-0.315221	-0.131678	-0.421251	-0.16295	-0.401478	-0.217935	-0.507509	-0.238528	-0.0549848	-0.344558	0.183543	-0.10603	-0.289573	[-0.2979 , 0.4705]	[-0.5039 , 0.3505]	[-0.7723 , 0.1419]
O43805	Sjoegren syndrome nuclear autoantigen 1 OS=Homo sapiens OX=9606 GN=SSNA1 PE=1 SV=2	SSNA1	2	35	2	1		cell organization and biogenesis;cellular component movement;metabolic process;regulation of biological process;transport	cytoplasm;cytoskeleton;cytosol;nucleus	protein binding		Regulation of PLK1 Activity at G2/M Transition; AURKA Activation by TPX2; Anchoring of the basal body to the plasma membrane; Recruitment of NuMA to mitotic centrosomes; Loss of Nlp from mitotic centrosomes; Recruitment of mitotic centrosome proteins and complexes		2.7803 (df=5)	0.0229774	0.0434031	0.381789	1	0.723004	0.999607	0.584611	0.445785	0.0344225	0.95599	0.0698043	0.816021	0.999311	0.655082	0.827077	0.990992	0.659366	-0.825047	0.03619	0.701205	-0.219308	1.1522	0.861237	1.52625	0.605739	1.97724	0.665015	-0.255498	1.11601	-0.920512	0.450991	1.3715	[-2.0625 , 0.4125]	[-1.33 , 1.4024]	[-0.755 , 2.1574]
O43808	Peroxisomal membrane protein PMP34 OS=Homo sapiens OX=9606 GN=SLC25A17 PE=1 SV=1	SLC25A17	2	14	2	1		metabolic process;transport	cytoplasm;membrane;mitochondrion	protein binding;transporter activity	Peroxisome	Alpha-oxidation of phytanate		1.3549 (df=2)	0.270476	0.33093			0.350437	0.481813									0.965586					-0.485038	-0.628824									-0.143786					[-1.3299 , 0.3598]
O43809	Cleavage and polyadenylation specificity factor subunit 5 OS=Homo sapiens OX=9606 GN=NUDT21 PE=1 SV=1	NUDT21	16	1062	15	1	Methyl [K122; K182]	cell organization and biogenesis;metabolic process	nucleus	catalytic activity;protein binding;RNA binding	mRNA surveillance pathway	Cleavage of Growing Transcript in the Termination Region ; Processing of Intronless Pre-mRNAs; mRNA 3'-end processing; mRNA Splicing - Major Pathway	mRNA Processing	1.3759 (df=5)	0.241754	0.300474	1	0.710513	0.57757	0.998107	0.956056	0.732667	0.602058	0.998318	0.959445	0.999787	0.791955	0.541787	0.699261	0.446416	0.999478	-0.00178375	0.341852	0.419254	-0.158283	-0.3158	0.343636	0.421037	-0.156499	-0.314016	0.0774013	-0.500135	-0.657652	-0.577536	-0.735053	-0.157517	[-0.6303 , 0.6267]	[-0.3569 , 1.0407]	[-0.3285 , 1.167]
O43813	Glutathione S-transferase LANCL1 OS=Homo sapiens OX=9606 GN=LANCL1 PE=1 SV=1	LANCL1	16	775	16	1		regulation of biological process;response to stimulus	cytoplasm;membrane	metal ion binding;protein binding;receptor activity;signal transducer activity				5.278 (df=5)	0.000293638	0.00122819	0.8308	0.999909	0.997578	0.705298	0.000846306	0.7963	0.993774	0.291154	7.77419e-05	0.990621	0.824586	0.00285859	0.589487	0.000930755	0.274561	-0.146617	0.0309892	-0.0649933	0.298487	0.878013	0.177607	0.0816241	0.445104	1.02463	-0.0959825	0.267498	0.847024	0.36348	0.943006	0.579526	[-0.5001 , 0.2069]	[-0.362 , 0.424]	[-0.4855 , 0.3556]
O43815	Striatin OS=Homo sapiens OX=9606 GN=STRN PE=1 SV=4	STRN	24	470	21	1		cell organization and biogenesis;regulation of biological process;response to stimulus	cytoplasm;membrane	protein binding				0.4684 (df=5)	0.798775	0.823842	0.999857	0.9527	0.991833	0.980642	0.996377	0.989013	0.999153	0.958632	0.988529	0.999946	0.832257	0.916077	0.907006	0.961335	0.999982	0.0675583	0.25935	0.186423	-0.325304	-0.225907	0.191791	0.118865	-0.392862	-0.293466	-0.0729265	-0.584653	-0.485257	-0.511727	-0.41233	0.0993964	[-0.715 , 0.8502]	[-0.6108 , 1.1295]	[-0.7446 , 1.1175]
O43818	U3 small nucleolar RNA-interacting protein 2 OS=Homo sapiens OX=9606 GN=RRP9 PE=1 SV=1	RRP9	15	360	15	1		metabolic process	nucleus	protein binding;RNA binding		Major pathway of rRNA processing in the nucleolus and cytosol; rRNA modification in the nucleus and cytosol		1.2153 (df=5)	0.309247	0.370781	0.997674	0.998921	0.951773	0.991329	0.41078	1	0.996598	0.999487	0.282501	0.99711	0.99948	0.330186	1	0.19933	0.399584	0.0617979	0.0585467	0.143663	0.140354	-0.450132	-0.00325118	0.0818648	0.0785559	-0.51193	0.085116	0.0818071	-0.508679	-0.00330894	-0.593795	-0.590486	[-0.3415 , 0.4651]	[-0.3898 , 0.5069]	[-0.3361 , 0.6234]
O43819	Protein SCO2 homolog, mitochondrial OS=Homo sapiens OX=9606 GN=SCO2 PE=1 SV=3	SCO2	7	185	7	1		cell organization and biogenesis;cellular homeostasis;metabolic process;regulation of biological process;transport	membrane;mitochondrion;organelle lumen	antioxidant activity;catalytic activity;metal ion binding;protein binding	Central carbon metabolism in cancer	TP53 Regulates Metabolic Genes; Respiratory electron transport	Copper homeostasis	3.3799 (df=5)	0.00790557	0.0182015	0.574043	0.520819	0.996286	0.999837	0.00383909	0.999889	0.95436	0.836094	0.0693588	0.913453	0.780474	0.1263	0.993506	0.0242456	0.0296857	0.285136	0.332827	0.101977	-0.0771318	1.12762	0.0476912	-0.183159	-0.362268	0.842487	-0.23085	-0.409959	0.794796	-0.179109	1.02565	1.20475	[-0.2217 , 0.792]	[-0.2307 , 0.8964]	[-0.501 , 0.705]
O43822	Cilia- and flagella-associated protein 410 OS=Homo sapiens OX=9606 GN=CFAP410 PE=1 SV=1	C21orf2	3	13	2	1		cell organization and biogenesis;regulation of biological process;response to stimulus	cytoplasm;cytoskeleton;membrane;mitochondrion	protein binding				4.4626 (df=4)	0.00361304	0.00963257						0.997598	0.229028	0.962061	0.0436479	0.186183	0.991398	0.0897123	0.307429	0.00154171	0.438454						-0.147639	0.992646	-0.485403	-2.09021	1.14028	-0.337764	-1.94257	-1.47805	-3.08286	-1.60481
O43823	A-kinase anchor protein 8 OS=Homo sapiens OX=9606 GN=AKAP8 PE=1 SV=1	AKAP8	7	128	7	1		cell organization and biogenesis;defense response;metabolic process;regulation of biological process;response to stimulus;transport	chromosome;cytoplasm;Golgi;membrane;mitochondrion;nucleus	DNA binding;metal ion binding;protein binding;RNA binding			G Protein Signaling Pathways	3.6255 (df=5)	0.00513645	0.0128579	0.697782	0.0576001	0.744095	0.984849	0.0191735	0.657587	0.999989	0.669808	0.172179	0.845519	0.168808	0.761991	0.666226	0.276815	0.037246	0.211159	0.464142	0.237856	-0.167403	0.816964	0.252983	0.0266966	-0.378562	0.605805	-0.226286	-0.631545	0.352822	-0.405259	0.579108	0.984367	[-0.2143 , 0.6366]	[-0.0089 , 0.9372]	[-0.2683 , 0.744]
O43824	Putative GTP-binding protein 6 OS=Homo sapiens OX=9606 GN=GTPBP6 PE=2 SV=4		3	36	3	1								3.8292 (df=5)	0.00367527	0.00976281	0.882275	0.824602	0.210225	0.99602	0.168038	0.286794	0.0289808	1	0.470243	0.916183	0.846857	0.0420015	0.458277	0.00697713	0.702311	-0.378896	0.480395	0.943405	-0.327228	-1.57022	0.859291	1.3223	0.0516675	-1.19133	0.463009	-0.807624	-2.05062	-1.27063	-2.51363	-1.243	[-1.3899 , 0.6321]	[-0.667 , 1.6278]	[-0.2594 , 2.1462]
O43827	Angiopoietin-related protein 7 OS=Homo sapiens OX=9606 GN=ANGPTL7 PE=1 SV=1	ANGPTL7	3	10	3	1		response to stimulus	extracellular	protein binding				6.7557 (df=2)	0.00403524	0.0105425								0.0326876	0.120471						0.00316067								2.08113	-1.74981						-3.83094
O43837	Isocitrate dehydrogenase [NAD] subunit beta, mitochondrial OS=Homo sapiens OX=9606 GN=IDH3B PE=1 SV=2	IDH3B	22	1041	22	1	Methyl [K146; K187]	metabolic process	mitochondrion;nucleus;organelle lumen	catalytic activity;metal ion binding;nucleotide binding	2-Oxocarboxylic acid metabolism; Carbon metabolism; Metabolic pathways; Biosynthesis of amino acids; Citrate cycle (TCA cycle)	Citric acid cycle (TCA cycle)	TCA Cycle	3.1777 (df=5)	0.0112765	0.0243085	0.993068	0.999323	0.0103318	0.999897	0.95846	0.999987	0.0501012	0.993465	0.856117	0.0600028	0.997914	0.911971	0.15306	0.0394451	0.99712	0.188504	0.12865	1.38103	-0.135151	-0.483622	-0.0598543	1.19252	-0.323655	-0.672126	1.25238	-0.263801	-0.612271	-1.51618	-1.86465	-0.34847	[-0.7869 , 1.164]	[-0.9559 , 1.2132]	[0.2205 , 2.5415]
O43847	Nardilysin OS=Homo sapiens OX=9606 GN=NRDC PE=1 SV=3		22	439	22	1								4.3389 (df=5)	0.00147735	0.00463266	0.999917	0.31481	0.998859	0.941989	0.00391416	0.467436	0.993311	0.906107	0.00699653	0.300197	0.277013	0.199304	0.990902	0.00439435	0.00669563	-0.0317987	-0.323908	0.0646344	0.220959	-0.913454	-0.292109	0.096433	0.252757	-0.881655	0.388542	0.544866	-0.589546	0.156324	-0.978088	-1.13441	[-0.443 , 0.3794]	[-0.7811 , 0.1333]	[-0.4246 , 0.5539]
O43852	Calumenin OS=Homo sapiens OX=9606 GN=CALU PE=1 SV=2	CALU	31	3216	7	1	Methyl [K70; K94; K130; K189; K202; K243; K255; K281]	metabolic process	endoplasmic reticulum;extracellular;Golgi;membrane;organelle lumen	metal ion binding;protein binding		Platelet degranulation ; Post-translational protein phosphorylation; Regulation of Insulin-like Growth Factor (IGF) transport and uptake by Insulin-like Growth Factor Binding Proteins (IGFBPs)	NOTCH1 regulation of human endothelial cell calcification	4.8214 (df=5)	0.000641428	0.00234025	0.999897	0.985327	0.620684	0.00130247	1	0.957185	0.765144	0.000980054	0.999971	0.362393	0.00982665	0.999137	9.87261e-05	0.898994	0.0289382	-0.0265367	0.0832108	-0.21037	0.792777	0.009217	0.109748	-0.183834	0.819314	0.0357537	-0.293581	0.709567	-0.0739938	1.00315	0.219587	-0.78356	[-0.3552 , 0.3021]	[-0.2822 , 0.4487]	[-0.6014 , 0.1807]
O43852-4	Isoform 4 of Calumenin OS=Homo sapiens OX=9606 GN=CALU	CALU	27	2695	3	1	Methyl [K78; K197; K210; K251; K263; K289]	metabolic process	endoplasmic reticulum;extracellular;Golgi;membrane;organelle lumen	metal ion binding;protein binding			NOTCH1 regulation of human endothelial cell calcification	3.7542 (df=5)	0.00409937	0.0106909	0.694863	1	0.950321	0.965061	0.013928	0.789734	0.999447	1	0.00104528	0.963793	0.9695	0.0237545	0.999969	0.00527407	0.0218467	0.355146	-0.00664204	0.255908	0.339486	-1.41501	-0.361788	-0.0992378	-0.01566	-1.77016	0.26255	0.346128	-1.40837	0.0835778	-1.67092	-1.7545	[-0.3581 , 1.0684]	[-0.7997 , 0.7864]	[-0.5926 , 1.1044]
O43854	EGF-like repeat and discoidin I-like domain-containing protein 3 OS=Homo sapiens OX=9606 GN=EDIL3 PE=1 SV=1	EDIL3	2	5	2	1		development;regulation of biological process	extracellular	metal ion binding;protein binding
O43861	Probable phospholipid-transporting ATPase IIB OS=Homo sapiens OX=9606 GN=ATP9B PE=2 SV=4	ATP9B	2	8	1	1		cell organization and biogenesis;transport	endosome;Golgi;membrane	catalytic activity;metal ion binding;nucleotide binding;transporter activity		Ion transport by P-type ATPases		1.9661 (df=4)	0.10868	0.155833	0.579366	0.822063	0.949062	0.343224		0.999177	0.283191	0.824285		0.500183	0.768838		0.186513			-0.309601	-0.251723	0.179596	-0.718772		0.0578775	0.489197	-0.409172		0.431319	-0.467049		-0.898368			[-0.8952 , 0.276]	[-0.9108 , 0.4073]	[-0.5095 , 0.8687]
O43865	S-adenosylhomocysteine hydrolase-like protein 1 OS=Homo sapiens OX=9606 GN=AHCYL1 PE=1 SV=2	AHCYL1	23	852	13	1		metabolic process;regulation of biological process;response to stimulus;transport	cytoplasm;cytosol;endoplasmic reticulum;membrane	catalytic activity;nucleotide binding;protein binding;RNA binding	Metabolic pathways; Cysteine and methionine metabolism	Ion homeostasis; FCERI mediated Ca+2 mobilization; PLC beta mediated events; DAG and IP3 signaling; Signaling by GPCR; Regulation of insulin secretion; VEGFR2 mediated cell proliferation; CLEC7A (Dectin-1) induces NFAT activation; Antigen activates B Cell Receptor (BCR) leading to generation of second messengers; Role of phospholipids in phagocytosis	Trans-sulfuration and one carbon metabolism; One carbon metabolism and related pathways	2.7221 (df=5)	0.0250598	0.0463762	0.982424	0.934651	0.998634	0.992214	0.0390952	0.99961	0.999975	0.926701	0.0141497	0.997998	0.868079	0.0113869	0.968241	0.0359145	0.426296	0.171466	0.259348	0.118002	-0.245934	-1.28065	0.0878824	-0.0534634	-0.4174	-1.45212	-0.141346	-0.505282	-1.54	-0.363936	-1.39865	-1.03472	[-0.5519 , 0.8948]	[-0.5449 , 1.0636]	[-0.7425 , 0.9785]
O43866	CD5 antigen-like OS=Homo sapiens OX=9606 GN=CD5L PE=1 SV=1	CD5L	13	400	11	1		cell death;defense response;response to stimulus;transport	cytoplasm;extracellular;membrane	receptor activity				3.8927 (df=5)	0.0032166	0.00879412	0.309418	0.228774	0.768176	0.998659	0.00269753	0.999117	0.998542	0.608982	0.0985475	0.981972	0.496159	0.200693	0.825301	0.0771416	0.0172886	0.336904	0.404928	0.256465	-0.110913	1.08234	0.0680238	-0.0804397	-0.447817	0.745432	-0.148463	-0.515841	0.677409	-0.367377	0.825872	1.19325	[-0.1363 , 0.8101]	[-0.1212 , 0.9311]	[-0.3065 , 0.8195]
O43895	Xaa-Pro aminopeptidase 2 OS=Homo sapiens OX=9606 GN=XPNPEP2 PE=1 SV=3	XPNPEP2	3	18	3	1		metabolic process	extracellular;membrane	catalytic activity;metal ion binding	Protein digestion and absorption	Post-translational modification: synthesis of GPI-anchored proteins		1.717 (df=5)	0.139876	0.191389	0.999752	0.996023	0.996593	0.988809	0.0900988	0.999888	0.981241	0.997462	0.134907	0.954618	0.999732	0.211131	0.947992	0.067798	0.543947	-0.0892954	-0.176359	0.182612	-0.340156	-1.60425	-0.0870633	0.271907	-0.25086	-1.51495	0.358971	-0.163797	-1.42789	-0.522768	-1.78686	-1.26409	[-1.014 , 0.8354]	[-1.2045 , 0.8518]	[-0.9175 , 1.2827]
O43896	Kinesin-like protein KIF1C OS=Homo sapiens OX=9606 GN=KIF1C PE=1 SV=3	KIF1C	2	26	1	1		cellular component movement;transport	cytoplasm;cytoskeleton;endoplasmic reticulum;Golgi	catalytic activity;motor activity;nucleotide binding;protein binding;RNA binding		COPI-dependent Golgi-to-ER retrograde traffic; Kinesins
O43913	Origin recognition complex subunit 5 OS=Homo sapiens OX=9606 GN=ORC5 PE=1 SV=1	ORC5	3	42	3	1		metabolic process	cytosol;nucleus	DNA binding;nucleotide binding;protein binding	Cell cycle	M/G1 Transition; CDT1 association with the CDC6:ORC:origin complex; Regulation of DNA replication; Activation of ATR in response to replication stress; Activation of the pre-replicative complex; CDC6 association with the ORC:origin complex; Association of licensing factors with the pre-replicative complex; E2F-enabled inhibition of pre-replication complex formation; Assembly of the ORC complex at…	Cell Cycle; G1 to S cell cycle control; DNA Replication	6.4774 (df=5)	3.94419e-05	0.000238251	0.79873	0.879994	0.00636836	0.989878	0.000215327	1	0.139867	0.764206	0.00358817	0.186678	0.806076	0.00518707	0.0533041	0.393816	0.00178883	0.439375	0.42216	1.48908	-0.362465	2.72201	-0.0172149	1.0497	-0.801841	2.28264	1.06691	-0.784626	2.29985	-1.85154	1.23294	3.08448	[-0.5675 , 1.4463]	[-0.6974 , 1.5417]	[0.2912 , 2.687]
O43920	NADH dehydrogenase [ubiquinone] iron-sulfur protein 5 OS=Homo sapiens OX=9606 GN=NDUFS5 PE=1 SV=3	NDUFS5	7	354	7	1		cell organization and biogenesis;metabolic process;transport	membrane;mitochondrion	catalytic activity	Parkinson's disease; Metabolic pathways; Alzheimer's disease; Non-alcoholic fatty liver disease (NAFLD); Oxidative phosphorylation; Huntington's disease	Complex I biogenesis	Electron Transport Chain; Oxidative phosphorylation	24.8378 (df=5)	3.25119e-15	1.12971e-12	1	0.999771	0.999955	0.996807	1.10105e-10	0.999489	0.999868	0.997998	1.10114e-10	1	0.988883	1.10117e-10	0.99272	1.10136e-10	4.67241e-10	-0.0149477	0.0692233	0.053174	-0.184171	-4.04707	0.084171	0.0681216	-0.169223	-4.03213	-0.0160494	-0.253394	-4.1163	-0.237345	-4.10025	-3.8629	[-0.6702 , 0.6403]	[-0.6594 , 0.7978]	[-0.7264 , 0.8328]
O43924	Retinal rod rhodopsin-sensitive cGMP 3',5'-cyclic phosphodiesterase subunit delta OS=Homo sapiens OX=9606 GN=PDE6D PE=1 SV=1	PDE6D	2	40	2	1		regulation of biological process;response to stimulus	cytoplasm;cytoskeleton;cytosol;membrane	catalytic activity;enzyme regulator activity;protein binding	Purine metabolism	ARL13B-mediated ciliary trafficking of INPP5E		2.1997 (df=5)	0.0619697	0.0977292	0.699917	0.991303	0.993588	0.977512	0.13426	0.450706	0.987431	0.631958	0.573612	0.916173	0.999461	0.0770347	0.905787	0.372415	0.138431	-0.575822	0.262461	-0.26292	0.500086	-1.71399	0.838283	0.312903	1.07591	-1.13817	-0.525381	0.237625	-1.97646	0.763006	-1.45108	-2.21408	[-1.7388 , 0.5872]	[-1.0306 , 1.5555]	[-1.6465 , 1.1207]
O43927	C-X-C motif chemokine 13 OS=Homo sapiens OX=9606 GN=CXCL13 PE=1 SV=1	CXCL13	4	29	4	1		cell communication;cellular component movement;cellular homeostasis;defense response;regulation of biological process;response to stimulus	extracellular	protein binding	Chemokine signaling pathway; Cytokine-cytokine receptor interaction	Chemokine receptors bind chemokines; G alpha (i) signalling events	Allograft Rejection; Chemokine signaling pathway	7.4269 (df=5)	8.67516e-06	6.80923e-05	0.0300096	0.929906	0.996989	0.455386	5.70941e-06	0.48323	0.306551	1	0.00330881	0.998904	0.860848	0.000122491	0.735093	7.03885e-05	0.032215	-1.00376	-0.343718	-0.18131	-1.01153	-3.36491	0.660044	0.822452	-0.00776501	-2.36115	0.162408	-0.667809	-3.02119	-0.830217	-3.1836	-2.35338	[-1.9462 , -0.0614]	[-1.3915 , 0.7041]	[-1.3025 , 0.9398]
O43929	Origin recognition complex subunit 4 OS=Homo sapiens OX=9606 GN=ORC4 PE=1 SV=2	ORC4	5	32	5	1		metabolic process	cytosol;nucleus	DNA binding;nucleotide binding;protein binding	Cell cycle	M/G1 Transition; CDT1 association with the CDC6:ORC:origin complex; Regulation of DNA replication; Activation of ATR in response to replication stress; Activation of the pre-replicative complex; CDC6 association with the ORC:origin complex; Association of licensing factors with the pre-replicative complex; E2F-enabled inhibition of pre-replication complex formation; Assembly of the ORC complex at…	Cell Cycle; G1 to S cell cycle control; DNA Replication	0.9159 (df=5)	0.474892	0.529052	0.995939	0.999863	0.819329	0.929842	0.894908	0.983675	0.968746	0.818941	0.973563	0.769919	0.973939	0.853002	0.550706	0.999963	0.630311	-0.129238	0.071353	-0.377087	0.422287	-0.468329	0.200591	-0.247848	0.551526	-0.339091	-0.44844	0.350934	-0.539682	0.799374	-0.0912422	-0.890616	[-0.8791 , 0.6206]	[-0.7624 , 0.9051]	[-1.2692 , 0.515]
O43933	Peroxisome biogenesis factor 1 OS=Homo sapiens OX=9606 GN=PEX1 PE=1 SV=1	PEX1	5	362	4	1		cell organization and biogenesis;metabolic process;response to stimulus;transport	cytoplasm;cytosol;membrane	catalytic activity;nucleotide binding;protein binding;RNA binding	Peroxisome			3.0001 (df=4)	0.0257126	0.0473441		0.449731	0.808505	0.594253	0.362748					0.131667	0.122071	0.0636142	0.966804	0.818359	0.99389		0.566176	-0.367324	-0.704926	-0.978441					-0.9335	-1.2711	-1.54462	-0.337603	-0.611117	-0.273515		[-0.379 , 1.5114]	[-1.3125 , 0.5779]
O60216	Double-strand-break repair protein rad21 homolog OS=Homo sapiens OX=9606 GN=RAD21 PE=1 SV=2	RAD21	18	438	18	1		cell death;cell division;cell organization and biogenesis;metabolic process;regulation of biological process;response to stimulus	chromosome;cytosol;membrane;nucleus	protein binding	Cell cycle	Meiotic synapsis; Separation of Sister Chromatids; Resolution of Sister Chromatid Cohesion; Cohesin Loading onto Chromatin; Establishment of Sister Chromatid Cohesion; SUMOylation of DNA damage response and repair proteins		1.8135 (df=5)	0.119079	0.16824	0.831788	0.295115	0.978677	0.985099	0.634768	0.920943	0.541824	1	0.960618	0.157573	0.985492	0.999977	0.887963	0.41234	0.983882	-0.198518	-0.384556	0.141229	-0.187946	-0.436399	-0.186038	0.339747	0.0105721	-0.237882	0.525785	0.19661	-0.0518434	-0.329175	-0.577629	-0.248454	[-0.6779 , 0.2809]	[-0.9176 , 0.1485]	[-0.4291 , 0.7116]
O60218	Aldo-keto reductase family 1 member B10 OS=Homo sapiens OX=9606 GN=AKR1B10 PE=1 SV=2	AKR1B10	17	231	17	1	Methyl [K155]; Met-loss+Acetyl [N-Term]	metabolic process	cytosol;extracellular;vacuole	catalytic activity;protein binding	Metabolic pathways; Galactose metabolism; Fructose and mannose metabolism; Pentose and glucuronate interconversions; Glycerolipid metabolism	Signaling by GPCR; Retinoid metabolism and transport	Metapathway biotransformation	1.5729 (df=5)	0.176746	0.231922	0.99787	0.506652	0.905735	0.996399	0.962752	0.311194	0.987122	0.976846	0.993379	0.165631	0.990131	0.436881	0.873585	0.999999	0.913452	-0.0837421	0.37019	-0.234321	0.160475	-0.26897	0.453932	-0.150579	0.244217	-0.185228	-0.604511	-0.209715	-0.639161	0.394796	-0.0346494	-0.429445	[-0.6404 , 0.4729]	[-0.2487 , 0.9891]	[-0.8966 , 0.4279]
O60220	Mitochondrial import inner membrane translocase subunit Tim8 A OS=Homo sapiens OX=9606 GN=TIMM8A PE=1 SV=1	TIMM8A	2	49	2	1		transport	membrane;mitochondrion	metal ion binding;protein binding		Mitochondrial protein import; Metabolism of proteins		7.246 (df=5)	1.13009e-05	8.57204e-05	0.804904	0.999488	0.210727	0.340908	3.99412e-06	0.969724	0.838303	0.802287	9.94683e-05	0.476211	0.524744	2.82867e-05	0.998639	0.00483115	0.0750999	-0.391792	-0.112837	-0.845514	-1.0758	-2.98415	0.278955	-0.453722	-0.684012	-2.59235	-0.732677	-0.962967	-2.87131	-0.230291	-2.13863	-1.90834	[-1.298 , 0.5144]	[-1.1204 , 0.8948]	[-1.9236 , 0.2326]
O60229	Kalirin OS=Homo sapiens OX=9606 GN=KALRN PE=1 SV=3		5	162	2	1								2.9608 (df=5)	0.0165009	0.0331608	0.739467	0.999518	0.94873	0.996176	0.00439543	0.948127	0.999816	0.999645	0.0524751	0.994853	0.999787	0.0146365	0.999998	0.0532838	0.136587	-0.482921	-0.12567	-0.369412	-0.298333	-2.24841	0.35725	0.113508	0.184588	-1.76549	-0.243742	-0.172662	-2.12274	0.0710795	-1.879	-1.95008	[-1.5047 , 0.5389]	[-1.2618 , 1.0104]	[-1.585 , 0.8462]
O60231	Pre-mRNA-splicing factor ATP-dependent RNA helicase DHX16 OS=Homo sapiens OX=9606 GN=DHX16 PE=1 SV=2	DHX16	18	157	16	1		metabolic process	cytoplasm;nucleus;spliceosomal complex	catalytic activity;nucleotide binding;protein binding;RNA binding	Spliceosome	mRNA Splicing - Major Pathway	mRNA Processing	2.7288 (df=5)	0.0247655	0.0459597	0.590308	0.027738	0.999524	0.999948	0.385802	0.5814	0.913865	0.866672	0.921637	0.183272	0.284429	0.999999	0.998693	0.608591	0.567486	0.279059	0.601925	0.0661265	-0.0608025	0.57466	0.322866	-0.212933	-0.339862	0.295601	-0.535799	-0.662728	-0.0272651	-0.126929	0.508534	0.635463	[-0.2246 , 0.7828]	[0.0419 , 1.162]	[-0.5331 , 0.6654]
O60232	Protein ZNRD2 OS=Homo sapiens OX=9606 GN=ZNRD2 PE=1 SV=1	SSSCA1	4	44	4	1		cell division		protein binding				2.0977 (df=5)	0.0737665	0.113107	0.98591	0.951213	0.999134	0.881192	0.150912	0.713188	0.947306	0.980979	0.0678132	0.998443	0.612592	0.477532	0.811505	0.331947	0.0796934	-0.204989	0.303291	0.134842	-0.586174	1.30991	0.50828	0.339831	-0.381185	1.5149	-0.168449	-0.889465	1.00662	-0.721016	1.17507	1.89608	[-1.1134 , 0.7034]	[-0.7068 , 1.3133]	[-0.9459 , 1.2156]
O60234	Glia maturation factor gamma OS=Homo sapiens OX=9606 GN=GMFG PE=1 SV=1	GMFG	15	828	11	1	Methyl [K17; K119; K137]; Met-loss+Acetyl [N-Term]	metabolic process;regulation of biological process;transport	extracellular;organelle lumen	enzyme regulator activity;protein binding		Neutrophil degranulation		3.607 (df=5)	0.00530667	0.0131513	0.638964	0.978592	0.999268	0.024815	0.968134	0.987366	0.599347	0.00173154	0.556687	0.937955	0.0106345	0.836648	0.0836318	0.995767	0.449788	-0.305391	-0.159298	0.0828944	1.07951	0.269316	0.146093	0.388286	1.3849	0.574707	0.242192	1.23881	0.428614	0.996618	0.186422	-0.810196	[-0.8835 , 0.2727]	[-0.8021 , 0.4835]	[-0.6049 , 0.7707]
O60237	Protein phosphatase 1 regulatory subunit 12B OS=Homo sapiens OX=9606 GN=PPP1R12B PE=1 SV=2	PPP1R12B	4	61	4	1		regulation of biological process;response to stimulus	cytoplasm;cytosol	enzyme regulator activity;protein binding	Proteoglycans in cancer; Oxytocin signaling pathway; Regulation of actin cytoskeleton; Focal adhesion; Vascular smooth muscle contraction	RHO GTPases activate PAKs; RHO GTPases Activate ROCKs; RHO GTPases activate PKNs; RHO GTPases activate CIT		3.2192 (df=5)	0.0105362	0.0230049	0.932767	0.957009	0.999648	0.984218	0.00212848	1	0.996723	0.999996	0.0144005	0.997528	0.999998	0.0228972	0.998056	0.0104161	0.127605	0.289389	0.294613	0.109928	0.353812	2.076	0.00522321	-0.179462	0.0644229	1.78661	-0.184685	0.0591997	1.78138	0.243885	1.96607	1.72218	[-0.602 , 1.1808]	[-0.717 , 1.3063]	[-0.9506 , 1.1704]
O60240	Perilipin-1 OS=Homo sapiens OX=9606 GN=PLIN1 PE=1 SV=2	PLIN1	38	4172	38	1	Methyl [K5; K39; K60; K111; K186; K210; K341; K377]; Met-loss+Acetyl [N-Term]	metabolic process	cytosol;endoplasmic reticulum		Regulation of lipolysis in adipocytes; PPAR signaling pathway	Triglyceride catabolism; Transcriptional regulation of white adipocyte differentiation	Adipogenesis; PPAR signaling pathway	2.7329 (df=5)	0.0245894	0.0456794	0.0400446	0.999811	0.892879	0.997601	0.797608	0.0558414	0.717251	0.262936	0.997113	0.840299	0.999822	0.74116	0.879633	0.996226	0.768716	0.426462	-0.0421298	0.180418	-0.109698	0.310873	-0.468592	-0.246044	-0.53616	-0.115589	0.222548	-0.067568	0.353003	-0.290116	0.130455	0.420571	[0.0119 , 0.841]	[-0.503 , 0.4188]	[-0.3127 , 0.6736]
O60244	Mediator of RNA polymerase II transcription subunit 14 OS=Homo sapiens OX=9606 GN=MED14 PE=1 SV=2	MED14	4	27	4	1		metabolic process;regulation of biological process;response to stimulus	membrane;nucleus	protein binding;receptor activity	Thyroid hormone signaling pathway	Transcriptional regulation of white adipocyte differentiation; PPARA activates gene expression; Generic Transcription Pathway		8.0491 (df=5)	3.15938e-06	2.99402e-05	0.466637	0.922418	0.728084	0.91244	1.25593e-05	0.988963	0.0612469	0.32982	0.000885603	0.300708	0.62223	0.000369779	1	1.5831e-06	7.39818e-05	-0.841061	-0.508065	0.773912	0.80856	-4.24794	0.332996	1.61497	1.64962	-3.40687	1.28198	1.31662	-3.73987	0.0346478	-5.02185	-5.0565	[-2.1985 , 0.5164]	[-2.0174 , 1.0012]	[-0.8411 , 2.3889]
O60245	Protocadherin-7 OS=Homo sapiens OX=9606 GN=PCDH7 PE=1 SV=2	PCDH7	10	49	10	1		transport	membrane	metal ion binding		Platelet degranulation		5.9948 (df=5)	8.77419e-05	0.000458963	0.999999	0.0319495	0.981258	1	0.010626	0.0341882	0.989544	1	0.0140656	0.0205743	0.385296	2.13309e-05	0.998464	0.0756236	0.100994	-0.0197879	0.83887	-0.204168	-0.0182153	-1.45318	0.858657	-0.18438	0.00157255	-1.43339	-1.04304	-0.857085	-2.29205	0.185952	-1.24901	-1.43497	[-0.7334 , 0.6938]	[0.0455 , 1.6323]	[-1.0531 , 0.6448]
O60256	Phosphoribosyl pyrophosphate synthase-associated protein 2 OS=Homo sapiens OX=9606 GN=PRPSAP2 PE=1 SV=1	PRPSAP2	18	706	16	1		metabolic process;regulation of biological process		catalytic activity;enzyme regulator activity;metal ion binding;protein binding				3.846 (df=5)	0.00349037	0.00938092	0.0384703	0.991469	0.735144	0.997312	0.999717	0.0230745	0.0034485	0.795091	0.339951	0.97412	0.966565	0.999999	0.775656	0.989156	0.992245	-0.322294	0.0700552	0.176205	-0.0844844	0.0530744	0.39235	0.4985	0.23781	0.375369	0.10615	-0.15454	-0.0169809	-0.26069	-0.123131	0.137559	[-0.634 , -0.0106]	[-0.2765 , 0.4166]	[-0.1946 , 0.5471]
O60259	Kallikrein-8 OS=Homo sapiens OX=9606 GN=KLK8 PE=1 SV=1	KLK8	2	7	1	1		cell death;cell organization and biogenesis;cell proliferation;metabolic process;regulation of biological process;response to stimulus	cytoplasm;extracellular	catalytic activity;protein binding		Formation of the cornified envelope	Spinal Cord Injury
O60262	Guanine nucleotide-binding protein G(I)/G(S)/G(O) subunit gamma-7 OS=Homo sapiens OX=9606 GN=GNG7 PE=1 SV=1	GNG7	5	166	5	1	Met-loss+Acetyl [N-Term]	regulation of biological process;response to stimulus	membrane	signal transducer activity	Morphine addiction; Serotonergic synapse; Cholinergic synapse; GABAergic synapse; Olfactory transduction; Ras signaling pathway; Pathways in cancer; PI3K-Akt signaling pathway; Circadian entrainment; Chemokine signaling pathway; Glutamatergic synapse; Alcoholism; Dopaminergic synapse; Retrograde endocannabinoid signaling	G alpha (z) signalling events; Activation of G protein gated Potassium channels; Cooperation of PDCL (PhLP1) and TRiC/CCT in G-protein beta folding; Glucagon-type ligand receptors; Thromboxane signalling through TP receptor; ADP signalling through P2Y purinoceptor 1; G beta:gamma signalling through PI3Kgamma; Vasopressin regulates renal water homeostasis via Aquaporins; G-protein activation; Inhi…	Myometrial Relaxation and Contraction Pathways; G Protein Signaling Pathways; Chemokine signaling pathway; Focal Adhesion-PI3K-Akt-mTOR-signaling pathway; Calcium Regulation in the Cardiac Cell	4.7626 (df=5)	0.000709709	0.0025486	0.670216	0.034446	0.215136	0.999975	0.00156593	0.560345	0.918192	0.905389	0.0276841	0.99506	0.323073	0.371559	0.584545	0.212182	0.0198544	0.278455	0.634341	0.5056	-0.0568436	1.29622	0.355886	0.227145	-0.335299	1.01777	-0.128741	-0.691185	0.661883	-0.562444	0.790624	1.35307	[-0.266 , 0.8229]	[0.029 , 1.2397]	[-0.1421 , 1.1533]
O60264	SWI/SNF-related matrix-associated actin-dependent regulator of chromatin subfamily A member 5 OS=Homo sapiens OX=9606 GN=SMARCA5 PE=1 SV=1	SMARCA5	54	1257	39	1		cell organization and biogenesis;metabolic process;regulation of biological process	chromosome;nucleus	catalytic activity;DNA binding;nucleotide binding;protein binding		Recruitment and ATM-mediated phosphorylation of repair and signaling proteins at DNA double strand breaks; NoRC negatively regulates rRNA expression; B-WICH complex positively regulates rRNA expression; Deposition of new CENPA-containing nucleosomes at the centromere		1.7403 (df=5)	0.13445	0.18553	0.999562	0.999831	0.797056	0.941031	0.135517	0.994876	0.922178	0.978583	0.211385	0.742322	0.905773	0.125172	1	0.667888	0.826082	-0.0426607	0.0390592	-0.204681	-0.212173	-0.578648	0.0817199	-0.16202	-0.169512	-0.535987	-0.24374	-0.251232	-0.617707	-0.00749178	-0.373967	-0.366475	[-0.436 , 0.3506]	[-0.3982 , 0.4763]	[-0.6726 , 0.2632]
O60271	C-Jun-amino-terminal kinase-interacting protein 4 OS=Homo sapiens OX=9606 GN=SPAG9 PE=1 SV=4	SPAG9	38	965	33	1		cell differentiation;cell organization and biogenesis;regulation of biological process;transport	cytoplasm;cytosol	protein binding;structural molecule activity		CDO in myogenesis		3.6126 (df=5)	0.00525469	0.0130598	0.747285	0.359686	0.141083	0.991456	1	0.0294594	0.00856522	0.999951	0.979046	0.992838	0.482309	0.79203	0.278065	0.565355	0.998588	0.137705	-0.222578	-0.297923	0.102071	0.0115222	-0.360283	-0.435628	-0.0356341	-0.126183	-0.0753454	0.324649	0.2341	0.399994	0.309445	-0.0905489	[-0.1565 , 0.4319]	[-0.5497 , 0.1045]	[-0.6479 , 0.0521]
O60282	Kinesin heavy chain isoform 5C OS=Homo sapiens OX=9606 GN=KIF5C PE=1 SV=1	KIF5C	18	901	4	1	Methyl [K238; K253; K846]	cell organization and biogenesis;cellular component movement;transport	cytoplasm;cytoskeleton	catalytic activity;motor activity;nucleotide binding;protein binding	Endocytosis; Dopaminergic synapse	Insulin processing		1.5805 (df=5)	0.174579	0.229532	0.99919	0.978772	0.632258	0.939657	0.738305	0.912587	0.827933	0.873162	0.621079	0.344227	0.99802	0.953099	0.440822	0.21698	0.999256	-0.102962	0.230079	-0.52932	0.453865	0.679371	0.33304	-0.426358	0.556827	0.782333	-0.759399	0.223787	0.449293	0.983185	1.20869	0.225506	[-0.9395 , 0.7336]	[-0.7001 , 1.1602]	[-1.5246 , 0.4659]
O60287	Nucleolar pre-ribosomal-associated protein 1 OS=Homo sapiens OX=9606 GN=URB1 PE=1 SV=4	URB1	4	45	4	1			nucleus	RNA binding				9.4991 (df=5)	3.43043e-07	4.77747e-06	0.0126712	0.0656436	0.0957041	0.999966	0.00731896	0.999878	1.03851e-05	0.275697	0.615856	0.000109024	0.403775	0.552913	0.646597	4.23429e-05	0.0519459	0.834656	0.766113	-0.774378	-0.0791185	1.50692	-0.0685423	-1.60903	-0.913774	0.672262	-1.54049	-0.845232	0.740804	0.69526	2.2813	1.58604	[0.1195 , 1.5498]	[-0.0291 , 1.5613]	[-1.6252 , 0.0765]
O60294	tRNA wybutosine-synthesizing protein 4 OS=Homo sapiens OX=9606 GN=LCMT2 PE=1 SV=3	LCMT2	2	4	1	1		metabolic process	cytoplasm;cytosol	catalytic activity;protein binding		Synthesis of wybutosine at G37 of tRNA(Phe)
O60306	RNA helicase aquarius OS=Homo sapiens OX=9606 GN=AQR PE=1 SV=4	AQR	25	303	24	1		metabolic process;response to stimulus	membrane;nucleus;spliceosomal complex	catalytic activity;DNA binding;nucleotide binding;protein binding;RNA binding	Spliceosome	Dual incision in TC-NER; Formation of TC-NER Pre-Incision Complex; mRNA Splicing - Major Pathway; Gap-filling DNA repair synthesis and ligation in TC-NER		5.1551 (df=5)	0.0003621	0.00145739	0.360874	0.999381	0.63757	0.607819	0.00423842	0.727462	0.0287218	0.998113	0.11845	0.547197	0.783637	0.0146329	0.14812	0.000355722	0.558347	-0.51799	-0.0986825	0.479641	-0.712376	-1.68198	0.419307	0.997631	-0.194386	-1.16399	0.578324	-0.613693	-1.5833	-1.19202	-2.16162	-0.969606	[-1.2801 , 0.2441]	[-0.946 , 0.7487]	[-0.427 , 1.3863]
O60313-2	Isoform 2 of Dynamin-like 120 kDa protein, mitochondrial OS=Homo sapiens OX=9606 GN=OPA1	OPA1	49	2132	49	1	Methyl [K265; K389; K424; K871]	cell death;cell organization and biogenesis;cellular component movement;cellular homeostasis;metabolic process;regulation of biological process;response to stimulus;transport	cytosol;membrane;mitochondrion	catalytic activity;metal ion binding;nucleotide binding;protein binding				1.4665 (df=5)	0.209595	0.266961	0.999998	0.968109	0.955035	0.606131	0.743017	0.983816	0.974506	0.581755	0.719025	0.999998	0.350857	0.476269	0.33791	0.458077	0.99998	0.0109734	0.0948026	0.109991	-0.29397	-0.253498	0.0838292	0.0990174	-0.304943	-0.264471	0.0151882	-0.388772	-0.3483	-0.40396	-0.363488	0.0404721	[-0.303 , 0.3249]	[-0.2543 , 0.4439]	[-0.2635 , 0.4835]
O60315	Zinc finger E-box-binding homeobox 2 OS=Homo sapiens OX=9606 GN=ZEB2 PE=1 SV=1	ZEB2	4	43	4	1		cell growth;cell organization and biogenesis;cell proliferation;cellular component movement;metabolic process;regulation of biological process	cytosol;nucleus	DNA binding;enzyme regulator activity;metal ion binding;protein binding	MicroRNAs in cancer		TGF-beta Signaling Pathway; TGF-beta Receptor Signaling	1.8832 (df=5)	0.106308	0.152973	1	0.999862	1	0.713959	0.0997543	0.999751	1	0.711843	0.103894	0.999932	0.843089	0.193581	0.774212	0.153651	0.935695	0.0180002	-0.10422	0.002028	-0.895753	-1.6627	-0.12222	-0.0159722	-0.913753	-1.6807	0.106248	-0.791533	-1.55848	-0.897781	-1.66473	-0.76695	[-1.0671 , 1.1031]	[-1.3209 , 1.1124]	[-1.2734 , 1.2774]
O60318	Germinal-center associated nuclear protein OS=Homo sapiens OX=9606 GN=MCM3AP PE=1 SV=2	MCM3AP	2	5	2	1		transport	cytoplasm;cytosol;membrane;nucleus	catalytic activity;DNA binding				3.4205 (df=1)	0.0746096	0.114183							0.0746096															0.852369
O60331	Phosphatidylinositol 4-phosphate 5-kinase type-1 gamma OS=Homo sapiens OX=9606 GN=PIP5K1C PE=1 SV=2	PIP5K1C	3	30	1	1		cell organization and biogenesis;cellular component movement;metabolic process;regulation of biological process;response to stimulus;transport	cytoplasm;cytosol;membrane;nucleus	catalytic activity;nucleotide binding;protein binding	Choline metabolism in cancer; Endocytosis; Fc gamma R-mediated phagocytosis; Inositol phosphate metabolism; Phospholipase D signaling pathway; Metabolic pathways; Regulation of actin cytoskeleton; Focal adhesion; Phosphatidylinositol signaling system	SEMA3A-Plexin repulsion signaling by inhibiting Integrin adhesion; PI5P, PP2A and IER3 Regulate PI3K/AKT Signaling; Clathrin-mediated endocytosis; Synthesis of PIPs at the plasma membrane	B Cell Receptor Signaling Pathway; Focal Adhesion; Regulation of Actin Cytoskeleton
O60333-2	Isoform 2 of Kinesin-like protein KIF1B OS=Homo sapiens OX=9606 GN=KIF1B	KIF1B	6	24	5	1		cell communication;cell death;cellular component movement;regulation of biological process;response to stimulus;transport	membrane;mitochondrion	catalytic activity;motor activity;nucleotide binding;protein binding				1.2108 (df=5)	0.311465	0.372523	0.997758	0.633283	0.575375	0.99913	0.672558	0.873617	0.819894	0.991266	0.829091	0.999978	0.823923	0.997337	0.779175	0.999497	0.743924	0.113953	0.442725	0.500977	-0.176711	0.656043	0.328772	0.387023	-0.290665	0.542089	0.0582514	-0.619437	0.213317	-0.677688	0.155066	0.832754	[-0.6357 , 0.8636]	[-0.3908 , 1.2762]	[-0.3909 , 1.3928]
O60341	Lysine-specific histone demethylase 1A OS=Homo sapiens OX=9606 GN=KDM1A PE=1 SV=2	KDM1A	14	186	14	1		cell organization and biogenesis;coagulation;development;metabolic process;regulation of biological process;response to stimulus	nucleus	catalytic activity;DNA binding;nucleotide binding;protein binding		Activated PKN1 stimulates transcription of AR (androgen receptor) regulated genes KLK2 and KLK3; Regulation of PTEN gene transcription; HDACs deacetylate histones; HDMs demethylate histones; Factors involved in megakaryocyte development and platelet production	Androgen receptor signaling pathway	14.0799 (df=5)	5.79934e-10	2.25095e-08	0.529581	0.996599	0.999451	0.999359	2.85354e-10	0.374406	0.889733	0.772866	2.40316e-08	0.980394	1	3.78547e-10	0.994842	6.76176e-09	1.82171e-07	-0.303331	0.0955442	-0.0699564	0.104159	-2.39658	0.398875	0.233375	0.40749	-2.09325	-0.165501	0.00861463	-2.49212	0.174115	-2.32662	-2.50074	[-0.821 , 0.2143]	[-0.48 , 0.6711]	[-0.6858 , 0.5459]
O60343	TBC1 domain family member 4 OS=Homo sapiens OX=9606 GN=TBC1D4 PE=1 SV=2	TBC1D4	15	140	14	1		cell organization and biogenesis;regulation of biological process;response to stimulus;transport	cytoplasm;cytosol;membrane	enzyme regulator activity;protein binding	Thyroid hormone signaling pathway; Insulin resistance	Translocation of GLUT4 to the plasma membrane	Insulin Signaling	10.1698 (df=5)	1.27118e-07	2.07512e-06	0.0745656	0.000333573	0.598004	0.974812	1.6708e-07	0.388039	0.981983	0.957748	0.000162096	0.192377	0.326267	0.0189459	0.999421	8.52716e-05	0.000630821	-0.617689	-1.11492	-0.427313	-0.288192	-2.4363	-0.497231	0.190376	0.329497	-1.81862	0.687607	0.826728	-1.32138	0.139121	-2.00899	-2.14811	[-1.2708 , 0.0354]	[-1.8411 , -0.3888]	[-1.2043 , 0.3497]
O60427	Acyl-CoA (8-3)-desaturase OS=Homo sapiens OX=9606 GN=FADS1 PE=1 SV=3	FADS1	4	61	2	1		cell communication;metabolic process;regulation of biological process;response to stimulus;transport	endoplasmic reticulum;membrane;mitochondrion	catalytic activity	Biosynthesis of unsaturated fatty acids; Fatty acid metabolism	PPARA activates gene expression; Linoleic acid (LA) metabolism; alpha-linolenic acid (ALA) metabolism		11.4324 (df=5)	2.18547e-08	4.71816e-07	0.73766	0.999999	1	0.430937	4.26063e-09	0.869588	0.862607	0.900989	1.46595e-07	1	0.521677	1.96349e-08	0.514504	3.06105e-08	0.000478263	-0.435116	-0.0286835	0.00432351	-1.00754	-4.27114	0.406433	0.43944	-0.572428	-3.83603	0.033007	-0.97886	-4.24246	-1.01187	-4.27547	-3.2636	[-1.354 , 0.4837]	[-1.0503 , 0.993]	[-1.0888 , 1.0975]
O60437	Periplakin OS=Homo sapiens OX=9606 GN=PPL PE=1 SV=4	PPL	118	2899	115	1	Methyl [K680]	cell death;cell organization and biogenesis;metabolic process;response to stimulus	cytoplasm;cytoskeleton;cytosol;membrane;mitochondrion;nucleus	protein binding;structural molecule activity		Butyrophilin (BTN) family interactions; Formation of the cornified envelope		5.19 (df=5)	0.000341156	0.00138763	0.413356	0.0776532	0.999998	0.999821	0.000496809	0.914227	0.569294	0.961356	0.0215959	0.164703	0.703756	0.146807	0.999604	0.00126334	0.0257697	0.176889	0.284857	-0.0114201	0.0422725	0.700567	0.107968	-0.18831	-0.134617	0.523678	-0.296277	-0.242584	0.41571	0.0536927	0.711987	0.658295	[-0.0956 , 0.4494]	[-0.0182 , 0.5879]	[-0.3356 , 0.3128]
O60443	Gasdermin-E OS=Homo sapiens OX=9606 GN=GSDME PE=1 SV=2	DFNA5; GSDME	15	224	15	1	Methyl [K39]	cell death;cell differentiation;regulation of biological process	cytoplasm;cytosol;membrane					2.5531 (df=5)	0.0336453	0.0593162	0.687698	0.498413	0.999833	0.999975	0.0382709	0.998128	0.696311	0.984998	0.279327	0.522604	0.941794	0.48043	0.99946	0.0447977	0.254746	-0.432831	-0.577713	0.0914397	-0.089678	-1.53089	-0.144882	0.52427	0.343153	-1.09806	0.669153	0.488035	-0.953182	-0.181118	-1.62233	-1.44122	[-1.2952 , 0.4296]	[-1.5366 , 0.3812]	[-0.9346 , 1.1174]
O60447	Ecotropic viral integration site 5 protein homolog OS=Homo sapiens OX=9606 GN=EVI5 PE=1 SV=3	EVI5	2	127	1	1		cell division;cell proliferation;development;metabolic process;regulation of biological process;transport	cytoplasm;cytoskeleton;cytosol;nucleus	catalytic activity;enzyme regulator activity;motor activity;protein binding
O60449-2	Isoform 2 of Lymphocyte antigen 75 OS=Homo sapiens OX=9606 GN=LY75	LY75-CD302; LY75; CD302	17	118	17	1		defense response;regulation of biological process;response to stimulus;transport	membrane	receptor activity;signal transducer activity				3.3189 (df=5)	0.00879966	0.0199123	0.976345	0.978837	0.840981	0.468175	0.0681262	0.75992	0.496034	0.752896	0.0242005	0.997181	0.267981	0.243141	0.157124	0.456284	0.00831758	-0.137348	0.148898	0.26265	-0.575174	0.890838	0.286246	0.399998	-0.437826	1.02819	0.113752	-0.724072	0.74194	-0.837824	0.628188	1.46601	[-0.6791 , 0.4044]	[-0.4535 , 0.7513]	[-0.3819 , 0.9072]
O60462	Neuropilin-2 OS=Homo sapiens OX=9606 GN=NRP2 PE=1 SV=3	NRP2	19	193	18	1		cell growth;cellular component movement;regulation of biological process;response to stimulus	extracellular;membrane	catalytic activity;metal ion binding;protein binding;receptor activity;signal transducer activity			VEGFA-VEGFR2 Signaling Pathway	0.7228 (df=5)	0.608188	0.652352	0.999781	0.959872	0.985079	0.99056	0.866227	0.992653	0.998193	0.974449	0.79724	0.999998	0.884963	0.606427	0.921351	0.680376	0.998496	0.0478094	0.161812	0.138068	-0.180034	-0.338367	0.114003	0.0902588	-0.227844	-0.386176	-0.0237442	-0.341847	-0.500179	-0.318103	-0.476435	-0.158332	[-0.46 , 0.5556]	[-0.4028 , 0.7264]	[-0.4661 , 0.7422]
O60476	Mannosyl-oligosaccharide 1,2-alpha-mannosidase IB OS=Homo sapiens OX=9606 GN=MAN1A2 PE=1 SV=1	MAN1A2	3	5	3	1		metabolic process	endoplasmic reticulum;Golgi;membrane	catalytic activity;metal ion binding	Metabolic pathways; N-Glycan biosynthesis; Protein processing in endoplasmic reticulum	Progressive trimming of alpha-1,2-linked mannose residues from Man9/8/7GlcNAc2 to produce Man5GlcNAc2; Intra-Golgi traffic		1.8846 (df=2)	0.172057	0.226744										0.148206	0.828882		0.64475												-0.970198	-0.376661		0.593537
O60478	Integral membrane protein GPR137B OS=Homo sapiens OX=9606 GN=GPR137B PE=1 SV=1	GPR137B	2	14	2	1			membrane;vacuole					0.6157 (df=3)	0.607488	0.651696	0.977971	0.998469			0.539493	0.997206			0.71248			0.648897				-0.172552	-0.0748966			-0.934932	0.097655			-0.76238			-0.860035				[-1.3089 , 0.9638]	[-1.2956 , 1.1459]
O60486	Plexin-C1 OS=Homo sapiens OX=9606 GN=PLXNC1 PE=1 SV=1	PLXNC1	20	232	18	1		regulation of biological process;response to stimulus	membrane	protein binding;receptor activity;signal transducer activity	Axon guidance	Other semaphorin interactions		0.7136 (df=5)	0.614941	0.65824	0.997492	0.858845	0.999999	0.987167	0.614609	0.979177	0.99971	0.998999	0.786035	0.946277	0.999999	0.968102	0.994155	0.722346	0.979108	-0.108774	-0.306194	-0.0236045	-0.264985	-0.648814	-0.19742	0.0851694	-0.156212	-0.54004	0.282589	0.0412082	-0.34262	-0.241381	-0.625209	-0.383828	[-0.8075 , 0.5899]	[-1.0831 , 0.4707]	[-0.8548 , 0.8076]
O60488	Long-chain-fatty-acid--CoA ligase 4 OS=Homo sapiens OX=9606 GN=ACSL4 PE=1 SV=2	ACSL4	18	489	14	1	Methyl [K587; K690]	cell differentiation;metabolic process;regulation of biological process;response to stimulus;transport	cytoplasm;endoplasmic reticulum;membrane;mitochondrion	catalytic activity;nucleotide binding	Fatty acid biosynthesis; Fatty acid metabolism; Fatty acid degradation; Metabolic pathways; PPAR signaling pathway; Peroxisome; Adipocytokine signaling pathway	Synthesis of very long-chain fatty acyl-CoAs	Fatty Acid Beta Oxidation; Fatty Acid Biosynthesis; Mitochondrial LC-Fatty Acid Beta-Oxidation; PPAR signaling pathway	5.3787 (df=5)	0.00024748	0.001073	0.965414	0.0329718	0.999434	0.701712	0.106949	0.00533078	0.92159	0.929688	0.293255	0.207812	0.0193252	0.000498481	0.634801	0.102397	0.946098	-0.22331	0.945054	0.109733	-0.684111	-1.23733	1.16836	0.333043	-0.460801	-1.01402	-0.835322	-1.62917	-2.18238	-0.793844	-1.34706	-0.553216	[-1.0302 , 0.5836]	[0.0479 , 1.8422]	[-0.8502 , 1.0697]
O60493	Sorting nexin-3 OS=Homo sapiens OX=9606 GN=SNX3 PE=1 SV=3	SNX3	19	1734	15	1	Met-loss+Acetyl [N-Term]	cell organization and biogenesis;metabolic process;regulation of biological process;response to stimulus;transport	cytoplasm;cytosol;endosome;membrane	protein binding	Endocytosis	WNT ligand biogenesis and trafficking; Ub-specific processing proteases		13.8011 (df=5)	8.33975e-10	3.08909e-08	0.991894	0.276732	0.590045	0.961789	1.04502e-09	0.112895	0.323873	0.996734	4.30123e-10	0.999307	0.295423	1.63092e-06	0.470304	1.09779e-06	1.22902e-07	-0.0514235	0.209945	0.169596	-0.125046	1.13538	0.261368	0.22102	-0.0736228	1.1868	-0.0403485	-0.334991	0.925434	-0.294642	0.965783	1.26043	[-0.3087 , 0.2058]	[-0.0761 , 0.496]	[-0.1364 , 0.4756]
O60496	Docking protein 2 OS=Homo sapiens OX=9606 GN=DOK2 PE=1 SV=2	DOK2	13	288	13	1		cellular component movement;regulation of biological process;response to stimulus	cytosol	protein binding;signal transducer activity		RET signaling; Tie2 Signaling	Rac1/Pak1/p38/MMP-2 pathway; IL-4 Signaling Pathway; EGF/EGFR Signaling Pathway	5.4875 (df=5)	0.000205792	0.000922396	0.921267	0.38812	0.0358522	0.998912	0.0244021	0.0790473	0.00405633	0.999964	0.00494167	0.873889	0.630233	0.452104	0.203896	0.919501	0.0776745	-0.138508	0.30245	0.508607	-0.0920115	0.766926	0.440957	0.647115	0.0464964	0.905433	0.206157	-0.394461	0.464476	-0.600619	0.258319	0.858937	[-0.5484 , 0.2714]	[-0.1533 , 0.7582]	[0.0209 , 0.9963]
O60499	Syntaxin-10 OS=Homo sapiens OX=9606 GN=STX10 PE=1 SV=1	STX10	1	30	1	1		cell organization and biogenesis;regulation of biological process;transport	cytosol;Golgi;membrane	protein binding	SNARE interactions in vesicular transport	Retrograde transport at the Trans-Golgi-Network		0.3265 (df=5)	0.895593	0.909933	0.883215	0.999924	0.995099	0.99993	0.995588	0.975256	0.998981	0.956609	0.999993	0.999701	0.999348	0.999284	0.994306	0.999995	0.993186	-0.439962	-0.0966624	-0.25137	0.146861	-0.344932	0.3433	0.188592	0.586824	0.0950301	-0.154708	0.243524	-0.24827	0.398232	-0.0935622	-0.491794	[-1.6164 , 0.7365]	[-1.3724 , 1.179]	[-1.6542 , 1.1515]
O60502	Protein O-GlcNAcase OS=Homo sapiens OX=9606 GN=OGA PE=1 SV=2	MGEA5	22	350	21	1		metabolic process	cytoplasm;cytosol;membrane;nucleus	catalytic activity	Insulin resistance			2.8159 (df=5)	0.0212685	0.0407553	0.714039	0.740334	0.998622	0.256648	0.850809	0.115444	0.971417	0.0433603	0.368536	0.648596	0.822644	0.999828	0.215216	0.763386	0.96988	-0.244534	0.263469	-0.0820335	0.644488	0.344689	0.508003	0.162501	0.889022	0.589223	-0.345503	0.381018	0.0812193	0.726521	0.426722	-0.299799	[-0.7464 , 0.2574]	[-0.2946 , 0.8215]	[-0.6792 , 0.5151]
O60504	Vinexin OS=Homo sapiens OX=9606 GN=SORBS3 PE=1 SV=2	SORBS3	22	431	21	1		cell organization and biogenesis;regulation of biological process	cytoplasm;cytoskeleton;cytosol;nucleus	protein binding;structural molecule activity		Smooth Muscle Contraction		2.6447 (df=5)	0.0286825	0.0519088	0.408726	0.0579457	0.999813	0.789587	0.170532	0.874019	0.786337	0.999973	0.801255	0.25996	0.994556	0.995529	0.908928	0.327041	0.957125	-0.401466	-0.671486	-0.0667874	-0.467418	-0.86716	-0.27002	0.334679	-0.0659523	-0.465694	0.604699	0.204068	-0.195674	-0.400631	-0.800373	-0.399742	[-1.0175 , 0.2146]	[-1.3564 , 0.0134]	[-0.7997 , 0.6661]
O60506	Heterogeneous nuclear ribonucleoprotein Q OS=Homo sapiens OX=9606 GN=SYNCRIP PE=1 SV=2	SYNCRIP	37	4089	25	1	Methyl [K42; K91; K100; K184; K221; K252; K265; K282; K356; K363; K576]	cell differentiation;metabolic process;regulation of biological process;response to stimulus	cytoplasm;endoplasmic reticulum;membrane;nucleus;spliceosomal complex	protein binding;RNA binding				15.1531 (df=5)	1.47179e-10	7.53595e-09	0.378822	0.0402914	0.14624	1.29134e-07	0.873221	0.833056	0.966115	1.36858e-09	0.238064	0.999639	2.44137e-10	0.051257	1.04204e-09	0.105016	0.00145857	-0.328253	-0.560839	-0.493512	1.84739	0.3222	-0.232586	-0.165259	2.17564	0.650453	0.0673271	2.40823	0.883039	2.3409	0.815712	-1.52519	[-0.8189 , 0.1624]	[-1.1064 , -0.0153]	[-1.0772 , 0.0902]
O60508	Pre-mRNA-processing factor 17 OS=Homo sapiens OX=9606 GN=CDC40 PE=1 SV=1	CDC40	9	81	9	1		cell organization and biogenesis;metabolic process;transport	cytoplasm;nucleus;spliceosomal complex	protein binding;RNA binding	Spliceosome	Cleavage of Growing Transcript in the Termination Region ; Transport of Mature mRNA derived from an Intron-Containing Transcript; mRNA 3'-end processing; mRNA Splicing - Major Pathway	mRNA Processing	3.436 (df=5)	0.00716362	0.0167482	0.977092	0.389161	0.999974	0.130864	0.260771	0.818692	0.998133	0.317408	0.117008	0.6822	0.835003	0.0195998	0.242168	0.284236	0.00666895	0.251557	0.736791	0.0726652	1.48	-1.27834	0.485234	-0.178892	1.22844	-1.5299	-0.664126	0.743207	-2.01513	1.40733	-1.35101	-2.75834	[-0.748 , 1.2511]	[-0.3746 , 1.8482]	[-1.1165 , 1.2618]
O60513	Beta-1,4-galactosyltransferase 4 OS=Homo sapiens OX=9606 GN=B4GALT4 PE=1 SV=1	B4GALT4	3	66	2	1		metabolic process	Golgi;membrane	catalytic activity;metal ion binding	Glycosaminoglycan biosynthesis - keratan sulfate; Glycosphingolipid biosynthesis - lacto and neolacto series; Metabolic pathways	Keratan sulfate biosynthesis; N-Glycan antennae elongation
O60518	Ran-binding protein 6 OS=Homo sapiens OX=9606 GN=RANBP6 PE=1 SV=2	RANBP6	8	278	4	1	Methyl [K713]; Met-loss+Acetyl [N-Term]	transport	cytoplasm;membrane;nucleus	protein binding;transporter activity				2.2803 (df=5)	0.0543317	0.0877509	0.581959	0.18239	0.212839	0.721263	0.978683	0.963593	0.950317	0.998143	0.562451	0.999996	0.999997	0.277509	0.999955	0.273349	0.574374	-0.499541	-0.785235	-0.835002	-0.723112	0.3705	-0.285694	-0.335461	-0.223571	0.870041	-0.0497674	0.0621225	1.15573	0.11189	1.2055	1.09361	[-1.3948 , 0.3957]	[-1.756 , 0.1856]	[-1.9026 , 0.2326]
O60524	Nuclear export mediator factor NEMF OS=Homo sapiens OX=9606 GN=NEMF PE=1 SV=4	NEMF	20	503	20	1		transport	nucleus					1.9503 (df=5)	0.094696	0.139034	0.999019	0.998103	0.999713	0.999269	0.0763151	0.999999	1	0.993191	0.048645	0.999999	0.990915	0.0555289	0.995601	0.0800135	0.44245	0.0677647	0.0864178	0.0626699	-0.109417	-0.855981	0.0186531	-0.00509478	-0.177182	-0.923746	-0.0237479	-0.195835	-0.942399	-0.172087	-0.918651	-0.746564	[-0.4615 , 0.5971]	[-0.5021 , 0.6749]	[-0.567 , 0.6924]
O60547	GDP-mannose 4,6 dehydratase OS=Homo sapiens OX=9606 GN=GMDS PE=1 SV=1	GMDS	16	416	16	1		metabolic process;regulation of biological process;response to stimulus	cytoplasm;cytosol	catalytic activity;nucleotide binding;protein binding	Fructose and mannose metabolism; Amino sugar and nucleotide sugar metabolism; Metabolic pathways	GDP-fucose biosynthesis		2.3947 (df=5)	0.0442843	0.0744397	0.786485	0.998979	0.0409809	0.999887	0.964149	0.97267	0.438868	0.99573	0.634211	0.172649	1	0.914818	0.537228	0.0917287	0.964627	0.329492	0.106485	0.905321	0.104776	-0.355214	-0.223007	0.575828	-0.224717	-0.684706	0.798835	-0.00170969	-0.461699	-0.800545	-1.26053	-0.459989	[-0.4123 , 1.0713]	[-0.7183 , 0.9313]	[0.0228 , 1.7878]
[truncated: 7,307 more rows]
[truncated: 36 more columns]

## Sheet: GSEA results for prim vs met
ID	NES_Paired	NES_Full	p.adjust_Paired	p.adjust_Full	core_enrichment_Paired	core_enrichment_Full	core_enrichment_both	pvalue_Paired	pvalue_Full	setSize_Paired	setSize_Full	enrichmentScore_Paired	enrichmentScore_Full	qvalues_Paired	qvalues_Full	rank_Paired	rank_Full	leading_edge_Paired	leading_edge_Full	Sign.p_Paired	Sign.p_Full	Sign.p_both	Sign.padj_Paired	Sign.padj_Full	Sign.padj_both	Summarized.p	Significance
[truncated: 4,776 more rows]

[truncated: 2 more sheets: GSEA results for stage, Therapy subgroups]
